# Supplementary material for: Overflow metabolism originates from growth optimization and cell heterogeneity
Source: eLife. 2025 Jun 5;13:RP94586. doi: 10.7554/eLife.94586 (PMC12140630; doi:10.7554/eLife.94586)
Supplement: Source data 1. [file elife-94586-data1.xlsx]

## Sheet: Fig. 1C
	Theoretical results		Experimental data
			Group A sources minimum media-WT		Glucose / lactose Inducible strain		Group A sources rich media-WT		Glucose-limited chemostat-WT
	Obtained from analytical results combining Eqs. S47 and S160		Reference: Nature 528, 99-104 (2015)						Reference: FEMS Microbiology Reviews 1, 85-116 (1996)
	Growth rate (1/h)	Jacetate (mM /OD600/h)†	Growth rate (1/h)	Jacetate (mM /OD600/h)	Growth rate (1/h)	Jacetate (mM /OD600/h)	Growth rate (1/h)	Jacetate (mM /OD600/h)	Growth rate (1/h)	Jacetate* (mM /OD600/h)
	0	0	1.01	2.32	0.58	0	1.09	3.78	0.94	1.56
	0.01313	5.24833e-18	1.03	2.84	0.64	0.02	1.16	4.15	0.88	1.22
	0.02626	2.62416e-17	0.72	0.07	0.82	0.62	1.04	3.06	0.82	0.81
	0.03939	1.10215e-16	0.99	2.67	0.95	2.06	0.78	0.58	0.81	0.68
	0.05253	3.67383e-16	0.55	-0.01	0.35	-0.01	0.8	-0.01	0.72	0
	0.06566	1.19399e-15	0.56	-0.01	0.55	-0.01	1.26	4.18
	0.07879	3.6056e-15	0.69	0	0.65	-0.01
	0.09192	1.05072e-14	0.78	-0.09	0.76	-0.01			* The conversion factor is 0.3 due to a calibration factor of 0.6 as specified in Appendix 11.
	0.10505	2.95376e-14	0.72	0	0.87	0.96
	0.11818	8.063e-14	0.93	1.44	0.92	2.3
	0.13131	2.1442e-13	0.45	0
	0.14444	5.56735e-13	1.14	4.07
	0.15758	1.4138e-12
	0.17071	3.51614e-12							†Jacetate (mM /OD600/h) is identical to Jacetate(M) in Eq. S160.
	0.18384	8.57328e-12
	0.19697	2.05108e-11
	0.2101	4.81799e-11
	0.22323	1.11183e-10
	0.23636	2.52169e-10
	0.24949	5.62343e-10
	0.26263	1.2334e-09
	0.27576	2.66151e-09
	0.28889	5.65164e-09
	0.30202	1.18124e-08
	0.31515	2.43055e-08
	0.32828	4.92428e-08
	0.34141	9.82473e-08
	0.35455	1.93062e-07
	0.36768	3.73703e-07
	0.38081	7.1262e-07
	0.39394	1.33887e-06
	0.40707	2.47861e-06
	0.4202	4.52176e-06
	0.43333	8.12972e-06
	0.44646	1.44061e-05
	0.4596	2.51626e-05
	0.47273	4.33246e-05
	0.48586	7.35386e-05
	0.49899	0.000123064
	0.51212	0.000203052
	0.52525	0.000330352
	0.53838	0.000529994
	0.55152	0.00083853
	0.56465	0.00131
	0.57778	0.00201
	0.59091	0.00306
	0.60404	0.00458
	0.61717	0.00676
	0.6303	0.00986
	0.64343	0.01418
	0.65657	0.02012
	0.6697	0.02818
	0.68283	0.03895
	0.69596	0.05314
	0.70909	0.07158
	0.72222	0.09518
	0.73535	0.12498
	0.74848	0.16206
	0.76162	0.20754
	0.77475	0.26256
	0.78788	0.32817
	0.80101	0.40532
	0.81414	0.49478
	0.82727	0.59706
	0.8404	0.71238
	0.85354	0.84062
	0.86667	0.98129
	0.8798	1.13348
	0.89293	1.29594
	0.90606	1.46704
	0.91919	1.64488
	0.93232	1.82734
	0.94545	2.01214
	0.95859	2.19701
	0.97172	2.37971
	0.98485	2.55816
	0.99798	2.73051
	1.01111	2.89523
	1.02424	3.05112
	1.03737	3.19732
	1.05051	3.33337
	1.06364	3.45912
	1.07677	3.57477
	1.0899	3.68073
	1.10303	3.77764
	1.11616	3.8663
	1.12929	3.94758
	1.14242	4.02238
	1.15556	4.09163
	1.16869	4.15619
	1.18182	4.21686
	1.19495	4.27438
	1.20808	4.32937
	1.22121	4.38237
	1.23434	4.43384
	1.24747	4.48414
	1.26061	4.53357
	1.27374	4.58235
	1.28687	4.63067
	1.3	4.67865

## Sheet: Fig. 1D
	Theoretical results			Experimental data
	Obtained from analytical results combining Eqs. S47 and S160			Reference: Nature 528, 99-104 (2015)
	Growth rate (1/h)	Jacetate (mM /OD600/h)	JCO2, r (mM /OD600/h)‡	Growth rate† (1/h)	Jacetate* (mM /OD600/h)	JCO2, r* (mM /OD600/h)
	0	0	0	0.81	0.36	6.95
	0.01313	5.24833e-18	0.14182	0.87	1.1	5.65
	0.02626	2.62416e-17	0.28364	0.96	2.5	4.01
	0.03939	1.10215e-16	0.42545	1.03	2.65	2.84
	0.05253	3.67383e-16	0.56727
	0.06566	1.19399e-15	0.70909
	0.07879	3.6056e-15	0.85091
	0.09192	1.05072e-14	0.99273
	0.10505	2.95376e-14	1.13455		† A factor calibration of 1.03/0.97 was multiplied on the reference data. *A factor calibration of 2.84/3.24 was multiplied on the reference data. See the footnote to Appendix 1-table 2 for details. ‡ JCO2, r (mM /OD600/h) is identical to JCO2, r(M) in Eq. S160.
	0.11818	8.063e-14	1.27636
	0.13131	2.1442e-13	1.41818
	0.14444	5.56735e-13	1.56
	0.15758	1.4138e-12	1.70182
	0.17071	3.51614e-12	1.84364
	0.18384	8.57328e-12	1.98545
	0.19697	2.05108e-11	2.12727
	0.2101	4.81799e-11	2.26909
	0.22323	1.11183e-10	2.41091
	0.23636	2.52169e-10	2.55273
	0.24949	5.62343e-10	2.69455
	0.26263	1.2334e-09	2.83636
	0.27576	2.66151e-09	2.97818
	0.28889	5.65164e-09	3.12
	0.30202	1.18124e-08	3.26182
	0.31515	2.43055e-08	3.40364
	0.32828	4.92428e-08	3.54545
	0.34141	9.82473e-08	3.68727
	0.35455	1.93062e-07	3.82909
	0.36768	3.73703e-07	3.97091
	0.38081	7.1262e-07	4.11273
	0.39394	1.33887e-06	4.25454
	0.40707	2.47861e-06	4.39636
	0.4202	4.52176e-06	4.53817
	0.43333	8.12972e-06	4.67998
	0.44646	1.44061e-05	4.82177
	0.4596	2.51626e-05	4.96356
	0.47273	4.33246e-05	5.10532
	0.48586	7.35386e-05	5.24705
	0.49899	0.000123064	5.38872
	0.51212	0.000203052	5.5303
	0.52525	0.000330352	5.67174
	0.53838	0.000529994	5.81296
	0.55152	0.00083853	5.95385
	0.56465	0.00131	6.09426
	0.57778	0.00201	6.23396
	0.59091	0.00306	6.37265
	0.60404	0.00458	6.5099
	0.61717	0.00676	6.64517
	0.6303	0.00986	6.7777
	0.64343	0.01418	6.90656
	0.65657	0.02012	7.03055
	0.6697	0.02818	7.14819
	0.68283	0.03895	7.25769
	0.69596	0.05314	7.35693
	0.70909	0.07158	7.44344
	0.72222	0.09518	7.51445
	0.73535	0.12498	7.56688
	0.74848	0.16206	7.59747
	0.76162	0.20754	7.60283
	0.77475	0.26256	7.57959
	0.78788	0.32817	7.52457
	0.80101	0.40532	7.43494
	0.81414	0.49478	7.3084
	0.82727	0.59706	7.14338
	0.8404	0.71238	6.93923
	0.85354	0.84062	6.69631
	0.86667	0.98129	6.41614
	0.8798	1.13348	6.10137
	0.89293	1.29594	5.75582
	0.90606	1.46704	5.38433
	0.91919	1.64488	4.99262
	0.93232	1.82734	4.58708
	0.94545	2.01214	4.17448
	0.95859	2.19701	3.7617
	0.97172	2.37971	3.35543
	0.98485	2.55816	2.9619
	0.99798	2.73051	2.58664
	1.01111	2.89523	2.2343
	1.02424	3.05112	1.90847
	1.03737	3.19732	1.61168
	1.05051	3.33337	1.34535
	1.06364	3.45912	1.1099
	1.07677	3.57477	0.90479
	1.0899	3.68073	0.72873
	1.10303	3.77764	0.5798
	1.11616	3.8663	0.45564
	1.12929	3.94758	0.35364
	1.14242	4.02238	0.27104
	1.15556	4.09163	0.20512
	1.16869	4.15619	0.15326
	1.18182	4.21686	0.11305
	1.19495	4.27438	0.08232
	1.20808	4.32937	0.05917
	1.22121	4.38237	0.04197
	1.23434	4.43384	0.02939
	1.24747	4.48414	0.02031
	1.26061	4.53357	0.01385
	1.27374	4.58235	0.00932
	1.28687	4.63067	0.00619
	1.3	4.67865	0.00405

## Sheet: Fig. 1E
	Relative substrate quality	Growth rate	Energy efficiency
	Normalized κA (%)*	λ (1/h)	εf (1/s)	εr (1/s)
	The variable	Obtained from Eq. S36	Obtained from Eq. S31
	0.01	0.03326	0.000246279	0.000529118
	0.01003	0.03336	0.000247034	0.000530728
	0.01006	0.03346	0.000247792	0.000532342
	0.01009	0.03356	0.000248553	0.000533962			* The κA for G6p at saturated concentration was set to be 100%
	0.01012	0.03366	0.000249315	0.000535586
	0.01015	0.03376	0.00025008	0.000537216
	0.01019	0.03386	0.000250848	0.00053885
	0.01022	0.03396	0.000251617	0.000540489
	0.01025	0.03406	0.000252389	0.000542133
	0.01028	0.03416	0.000253164	0.000543782
	0.01031	0.03426	0.00025394	0.000545436
	0.01034	0.03436	0.000254719	0.000547095
	0.01038	0.03447	0.000255501	0.000548759
	0.01041	0.03457	0.000256285	0.000550427
	0.01044	0.03467	0.000257071	0.000552101
	0.01047	0.03477	0.00025786	0.00055378
	0.0105	0.03488	0.000258651	0.000555464
	0.01054	0.03498	0.000259444	0.000557153
	0.01057	0.03509	0.00026024	0.000558847
	0.0106	0.03519	0.000261039	0.000560547
	0.01063	0.03529	0.000261839	0.000562251
	0.01067	0.0354	0.000262643	0.00056396
	0.0107	0.0355	0.000263448	0.000565675
	0.01073	0.03561	0.000264257	0.000567395
	0.01076	0.03572	0.000265067	0.00056912
	0.0108	0.03582	0.000265881	0.00057085
	0.01083	0.03593	0.000266696	0.000572585
	0.01086	0.03604	0.000267514	0.000574325
	0.0109	0.03614	0.000268335	0.000576071
	0.01093	0.03625	0.000269158	0.000577822
	0.01097	0.03636	0.000269984	0.000579578
	0.011	0.03647	0.000270812	0.00058134
	0.01103	0.03657	0.000271643	0.000583106
	0.01107	0.03668	0.000272476	0.000584879
	0.0111	0.03679	0.000273312	0.000586656
	0.01113	0.0369	0.00027415	0.000588439
	0.01117	0.03701	0.000274991	0.000590227
	0.0112	0.03712	0.000275835	0.00059202
	0.01124	0.03723	0.000276681	0.000593819
	0.01127	0.03734	0.000277529	0.000595623
	0.01131	0.03745	0.000278381	0.000597433
	0.01134	0.03756	0.000279235	0.000599248
	0.01138	0.03767	0.000280091	0.000601068
	0.01141	0.03779	0.00028095	0.000602894
	0.01145	0.0379	0.000281812	0.000604726
	0.01148	0.03801	0.000282676	0.000606563
	0.01152	0.03812	0.000283543	0.000608405
	0.01155	0.03824	0.000284413	0.000610253
	0.01159	0.03835	0.000285285	0.000612107
	0.01162	0.03846	0.00028616	0.000613966
	0.01166	0.03858	0.000287038	0.000615831
	0.0117	0.03869	0.000287918	0.000617701
	0.01173	0.03881	0.000288801	0.000619577
	0.01177	0.03892	0.000289687	0.000621458
	0.0118	0.03904	0.000290576	0.000623345
	0.01184	0.03915	0.000291467	0.000625238
	0.01188	0.03927	0.000292361	0.000627136
	0.01191	0.03938	0.000293257	0.000629041
	0.01195	0.0395	0.000294157	0.00063095
	0.01199	0.03962	0.000295059	0.000632866
	0.01202	0.03974	0.000295964	0.000634787
	0.01206	0.03985	0.000296871	0.000636714
	0.0121	0.03997	0.000297782	0.000638647
	0.01213	0.04009	0.000298695	0.000640586
	0.01217	0.04021	0.000299611	0.00064253
	0.01221	0.04033	0.00030053	0.000644481
	0.01225	0.04045	0.000301451	0.000646437
	0.01228	0.04057	0.000302376	0.000648399
	0.01232	0.04069	0.000303303	0.000650366
	0.01236	0.04081	0.000304233	0.00065234
	0.0124	0.04093	0.000305166	0.00065432
	0.01244	0.04105	0.000306102	0.000656305
	0.01247	0.04117	0.000307041	0.000658297
	0.01251	0.04129	0.000307982	0.000660294
	0.01255	0.04141	0.000308927	0.000662298
	0.01259	0.04153	0.000309874	0.000664307
	0.01263	0.04166	0.000310824	0.000666322
	0.01267	0.04178	0.000311777	0.000668344
	0.01271	0.0419	0.000312733	0.000670371
	0.01275	0.04203	0.000313692	0.000672405
	0.01279	0.04215	0.000314654	0.000674445
	0.01282	0.04228	0.000315619	0.00067649
	0.01286	0.0424	0.000316586	0.000678542
	0.0129	0.04253	0.000317557	0.0006806
	0.01294	0.04265	0.000318531	0.000682665
	0.01298	0.04278	0.000319507	0.000684735
	0.01302	0.0429	0.000320487	0.000686811
	0.01306	0.04303	0.00032147	0.000688894
	0.0131	0.04316	0.000322455	0.000690983
	0.01314	0.04329	0.000323444	0.000693078
	0.01318	0.04341	0.000324436	0.00069518
	0.01322	0.04354	0.00032543	0.000697287
	0.01327	0.04367	0.000326428	0.000699402
	0.01331	0.0438	0.000327429	0.000701522
	0.01335	0.04393	0.000328433	0.000703649
	0.01339	0.04406	0.00032944	0.000705782
	0.01343	0.04419	0.00033045	0.000707921
	0.01347	0.04432	0.000331463	0.000710067
	0.01351	0.04445	0.000332479	0.000712219
	0.01355	0.04458	0.000333498	0.000714378
	0.01359	0.04471	0.00033452	0.000716543
	0.01364	0.04484	0.000335546	0.000718714
	0.01368	0.04497	0.000336575	0.000720892
	0.01372	0.04511	0.000337606	0.000723077
	0.01376	0.04524	0.000338641	0.000725268
	0.01381	0.04537	0.000339679	0.000727466
	0.01385	0.04551	0.000340721	0.00072967
	0.01389	0.04564	0.000341765	0.00073188
	0.01393	0.04577	0.000342813	0.000734098
	0.01398	0.04591	0.000343864	0.000736322
	0.01402	0.04604	0.000344918	0.000738552
	0.01406	0.04618	0.000345975	0.000740789
	0.01411	0.04631	0.000347035	0.000743033
	0.01415	0.04645	0.000348099	0.000745284
	0.01419	0.04659	0.000349166	0.000747541
	0.01424	0.04672	0.000350236	0.000749805
	0.01428	0.04686	0.00035131	0.000752076
	0.01432	0.047	0.000352387	0.000754354
	0.01437	0.04714	0.000353467	0.000756638
	0.01441	0.04728	0.00035455	0.000758929
	0.01446	0.04742	0.000355637	0.000761227
	0.0145	0.04755	0.000356727	0.000763532
	0.01455	0.04769	0.00035782	0.000765844
	0.01459	0.04783	0.000358917	0.000768162
	0.01463	0.04797	0.000360017	0.000770488
	0.01468	0.04812	0.00036112	0.00077282
	0.01473	0.04826	0.000362227	0.000775159
	0.01477	0.0484	0.000363337	0.000777506
	0.01482	0.04854	0.000364451	0.000779859
	0.01486	0.04868	0.000365568	0.000782219
	0.01491	0.04883	0.000366688	0.000784587
	0.01495	0.04897	0.000367812	0.000786961
	0.015	0.04911	0.000368939	0.000789343
	0.01505	0.04926	0.00037007	0.000791731
	0.01509	0.0494	0.000371204	0.000794127
	0.01514	0.04955	0.000372341	0.00079653
	0.01518	0.04969	0.000373482	0.000798939
	0.01523	0.04984	0.000374627	0.000801357
	0.01528	0.04998	0.000375775	0.000803781
	0.01532	0.05013	0.000376926	0.000806212
	0.01537	0.05028	0.000378081	0.000808651
	0.01542	0.05042	0.00037924	0.000811097
	0.01547	0.05057	0.000380402	0.00081355
	0.01551	0.05072	0.000381567	0.000816011
	0.01556	0.05087	0.000382737	0.000818479
	0.01561	0.05102	0.000383909	0.000820954
	0.01566	0.05117	0.000385086	0.000823437
	0.01571	0.05132	0.000386266	0.000825926
	0.01575	0.05147	0.000387449	0.000828424
	0.0158	0.05162	0.000388636	0.000830929
	0.01585	0.05177	0.000389827	0.000833441
	0.0159	0.05192	0.000391021	0.00083596
	0.01595	0.05207	0.000392219	0.000838488
	0.016	0.05222	0.000393421	0.000841022
	0.01605	0.05238	0.000394627	0.000843564
	0.0161	0.05253	0.000395836	0.000846114
	0.01615	0.05268	0.000397048	0.000848671
	0.0162	0.05284	0.000398265	0.000851236
	0.01625	0.05299	0.000399485	0.000853809
	0.0163	0.05315	0.000400709	0.000856389
	0.01635	0.0533	0.000401936	0.000858977
	0.0164	0.05346	0.000403168	0.000861572
	0.01645	0.05361	0.000404403	0.000864175
	0.0165	0.05377	0.000405642	0.000866786
	0.01655	0.05393	0.000406884	0.000869405
	0.0166	0.05408	0.000408131	0.000872031
	0.01665	0.05424	0.000409381	0.000874666
	0.0167	0.0544	0.000410635	0.000877308
	0.01675	0.05456	0.000411893	0.000879958
	0.0168	0.05472	0.000413155	0.000882615
	0.01686	0.05488	0.00041442	0.000885281
	0.01691	0.05504	0.00041569	0.000887954
	0.01696	0.0552	0.000416963	0.000890636
	0.01701	0.05536	0.00041824	0.000893325
	0.01706	0.05552	0.000419521	0.000896022
	0.01712	0.05568	0.000420806	0.000898728
	0.01717	0.05584	0.000422095	0.000901441
	0.01722	0.05601	0.000423388	0.000904162
	0.01727	0.05617	0.000424685	0.000906892
	0.01733	0.05633	0.000425985	0.000909629
	0.01738	0.0565	0.00042729	0.000912375
	0.01743	0.05666	0.000428599	0.000915129
	0.01749	0.05683	0.000429912	0.000917891
	0.01754	0.05699	0.000431228	0.000920661
	0.0176	0.05716	0.000432549	0.000923439
	0.01765	0.05732	0.000433874	0.000926226
	0.0177	0.05749	0.000435202	0.00092902
	0.01776	0.05766	0.000436535	0.000931823
	0.01781	0.05783	0.000437872	0.000934635
	0.01787	0.05799	0.000439213	0.000937454
	0.01792	0.05816	0.000440558	0.000940282
	0.01798	0.05833	0.000441907	0.000943118
	0.01803	0.0585	0.00044326	0.000945963
	0.01809	0.05867	0.000444618	0.000948816
	0.01814	0.05884	0.000445979	0.000951678
	0.0182	0.05901	0.000447345	0.000954548
	0.01826	0.05918	0.000448715	0.000957426
	0.01831	0.05936	0.000450089	0.000960313
	0.01837	0.05953	0.000451467	0.000963209
	0.01843	0.0597	0.000452849	0.000966113
	0.01848	0.05987	0.000454236	0.000969026
	0.01854	0.06005	0.000455627	0.000971947
	0.0186	0.06022	0.000457022	0.000974877
	0.01865	0.0604	0.000458421	0.000977815
	0.01871	0.06057	0.000459825	0.000980763
	0.01877	0.06075	0.000461233	0.000983718
	0.01883	0.06092	0.000462645	0.000986683
	0.01888	0.0611	0.000464061	0.000989657
	0.01894	0.06128	0.000465482	0.000992639
	0.019	0.06145	0.000466907	0.00099563
	0.01906	0.06163	0.000468337	0.000998629
	0.01912	0.06181	0.000469771	0.001
	0.01918	0.06199	0.000471209	0.001
	0.01924	0.06217	0.000472651	0.00101
	0.01929	0.06235	0.000474098	0.00101
	0.01935	0.06253	0.00047555	0.00101
	0.01941	0.06271	0.000477005	0.00102
	0.01947	0.06289	0.000478466	0.00102
	0.01953	0.06307	0.00047993	0.00102
	0.01959	0.06326	0.000481399	0.00103
	0.01965	0.06344	0.000482873	0.00103
	0.01971	0.06362	0.000484351	0.00103
	0.01977	0.06381	0.000485834	0.00104
	0.01984	0.06399	0.000487321	0.00104
	0.0199	0.06418	0.000488813	0.00104
	0.01996	0.06436	0.000490309	0.00104
	0.02002	0.06455	0.000491809	0.00105
	0.02008	0.06473	0.000493315	0.00105
	0.02014	0.06492	0.000494825	0.00105
	0.0202	0.06511	0.000496339	0.00106
	0.02027	0.0653	0.000497858	0.00106
	0.02033	0.06548	0.000499382	0.00106
	0.02039	0.06567	0.00050091	0.00107
	0.02045	0.06586	0.000502443	0.00107
	0.02052	0.06605	0.000503981	0.00107
	0.02058	0.06624	0.000505524	0.00108
	0.02064	0.06643	0.000507071	0.00108
	0.02071	0.06663	0.000508622	0.00108
	0.02077	0.06682	0.000510179	0.00109
	0.02083	0.06701	0.00051174	0.00109
	0.0209	0.0672	0.000513306	0.00109
	0.02096	0.0674	0.000514877	0.0011
	0.02103	0.06759	0.000516453	0.0011
	0.02109	0.06779	0.000518033	0.0011
	0.02116	0.06798	0.000519618	0.00111
	0.02122	0.06818	0.000521208	0.00111
	0.02129	0.06837	0.000522803	0.00111
	0.02135	0.06857	0.000524403	0.00112
	0.02142	0.06877	0.000526007	0.00112
	0.02148	0.06896	0.000527617	0.00112
	0.02155	0.06916	0.000529231	0.00113
	0.02162	0.06936	0.00053085	0.00113
	0.02168	0.06956	0.000532474	0.00113
	0.02175	0.06976	0.000534103	0.00114
	0.02182	0.06996	0.000535738	0.00114
	0.02188	0.07016	0.000537377	0.00114
	0.02195	0.07036	0.000539021	0.00115
	0.02202	0.07057	0.00054067	0.00115
	0.02209	0.07077	0.000542324	0.00115
	0.02215	0.07097	0.000543983	0.00116
	0.02222	0.07117	0.000545647	0.00116
	0.02229	0.07138	0.000547316	0.00116
	0.02236	0.07158	0.00054899	0.00117
	0.02243	0.07179	0.00055067	0.00117
	0.0225	0.07199	0.000552354	0.00117
	0.02257	0.0722	0.000554044	0.00118
	0.02264	0.07241	0.000555739	0.00118
	0.0227	0.07262	0.000557439	0.00119
	0.02277	0.07282	0.000559144	0.00119
	0.02284	0.07303	0.000560854	0.00119
	0.02292	0.07324	0.000562569	0.0012
	0.02299	0.07345	0.00056429	0.0012
	0.02306	0.07366	0.000566016	0.0012
	0.02313	0.07387	0.000567747	0.00121
	0.0232	0.07408	0.000569484	0.00121
	0.02327	0.07429	0.000571225	0.00121
	0.02334	0.07451	0.000572972	0.00122
	0.02341	0.07472	0.000574725	0.00122
	0.02348	0.07493	0.000576482	0.00122
	0.02356	0.07515	0.000578245	0.00123
	0.02363	0.07536	0.000580014	0.00123
	0.0237	0.07558	0.000581787	0.00124
	0.02378	0.07579	0.000583566	0.00124
	0.02385	0.07601	0.000585351	0.00124
	0.02392	0.07623	0.000587141	0.00125
	0.024	0.07644	0.000588936	0.00125
	0.02407	0.07666	0.000590737	0.00125
	0.02414	0.07688	0.000592543	0.00126
	0.02422	0.0771	0.000594355	0.00126
	0.02429	0.07732	0.000596173	0.00127
	0.02437	0.07754	0.000597995	0.00127
	0.02444	0.07776	0.000599824	0.00127
	0.02452	0.07798	0.000601658	0.00128
	0.02459	0.07821	0.000603497	0.00128
	0.02467	0.07843	0.000605342	0.00128
	0.02474	0.07865	0.000607193	0.00129
	0.02482	0.07888	0.000609049	0.00129
	0.0249	0.0791	0.000610911	0.0013
	0.02497	0.07933	0.000612779	0.0013
	0.02505	0.07955	0.000614652	0.0013
	0.02513	0.07978	0.000616531	0.00131
	0.0252	0.08	0.000618416	0.00131
	0.02528	0.08023	0.000620306	0.00132
	0.02536	0.08046	0.000622203	0.00132
	0.02544	0.08069	0.000624104	0.00132
	0.02552	0.08092	0.000626012	0.00133
	0.02559	0.08115	0.000627926	0.00133
	0.02567	0.08138	0.000629845	0.00134
	0.02575	0.08161	0.00063177	0.00134
	0.02583	0.08184	0.000633701	0.00134
	0.02591	0.08207	0.000635638	0.00135
	0.02599	0.08231	0.000637581	0.00135
	0.02607	0.08254	0.000639529	0.00136
	0.02615	0.08277	0.000641484	0.00136
	0.02623	0.08301	0.000643444	0.00136
	0.02631	0.08324	0.000645411	0.00137
	0.02639	0.08348	0.000647383	0.00137
	0.02647	0.08372	0.000649362	0.00138
	0.02655	0.08395	0.000651346	0.00138
	0.02664	0.08419	0.000653337	0.00138
	0.02672	0.08443	0.000655333	0.00139
	0.0268	0.08467	0.000657336	0.00139
	0.02688	0.08491	0.000659344	0.0014
	0.02697	0.08515	0.000661359	0.0014
	0.02705	0.08539	0.00066338	0.00141
	0.02713	0.08563	0.000665407	0.00141
	0.02722	0.08587	0.00066744	0.00141
	0.0273	0.08611	0.000669479	0.00142
	0.02738	0.08636	0.000671525	0.00142
	0.02747	0.0866	0.000673576	0.00143
	0.02755	0.08685	0.000675634	0.00143
	0.02764	0.08709	0.000677698	0.00143
	0.02772	0.08734	0.000679769	0.00144
	0.02781	0.08758	0.000681845	0.00144
	0.02789	0.08783	0.000683928	0.00145
	0.02798	0.08808	0.000686018	0.00145
	0.02806	0.08833	0.000688113	0.00146
	0.02815	0.08857	0.000690215	0.00146
	0.02824	0.08882	0.000692324	0.00147
	0.02832	0.08907	0.000694439	0.00147
	0.02841	0.08933	0.00069656	0.00147
	0.0285	0.08958	0.000698688	0.00148
	0.02859	0.08983	0.000700822	0.00148
	0.02867	0.09008	0.000702962	0.00149
	0.02876	0.09034	0.000705109	0.00149
	0.02885	0.09059	0.000707263	0.0015
	0.02894	0.09084	0.000709423	0.0015
	0.02903	0.0911	0.00071159	0.0015
	0.02912	0.09136	0.000713763	0.00151
	0.02921	0.09161	0.000715943	0.00151
	0.0293	0.09187	0.000718129	0.00152
	0.02939	0.09213	0.000720322	0.00152
	0.02948	0.09239	0.000722522	0.00153
	0.02957	0.09265	0.000724728	0.00153
	0.02966	0.09291	0.000726941	0.00154
	0.02975	0.09317	0.000729161	0.00154
	0.02984	0.09343	0.000731387	0.00155
	0.02993	0.09369	0.000733621	0.00155
	0.03003	0.09395	0.000735861	0.00155
	0.03012	0.09422	0.000738107	0.00156
	0.03021	0.09448	0.000740361	0.00156
	0.0303	0.09474	0.000742622	0.00157
	0.0304	0.09501	0.000744889	0.00157
	0.03049	0.09528	0.000747163	0.00158
	0.03058	0.09554	0.000749444	0.00158
	0.03068	0.09581	0.000751732	0.00159
	0.03077	0.09608	0.000754027	0.00159
	0.03087	0.09635	0.000756329	0.0016
	0.03096	0.09662	0.000758638	0.0016
	0.03106	0.09689	0.000760953	0.00161
	0.03115	0.09716	0.000763276	0.00161
	0.03125	0.09743	0.000765606	0.00162
	0.03134	0.0977	0.000767943	0.00162
	0.03144	0.09797	0.000770287	0.00163
	0.03154	0.09825	0.000772638	0.00163
	0.03163	0.09852	0.000774996	0.00164
	0.03173	0.09879	0.000777362	0.00164
	0.03183	0.09907	0.000779734	0.00165
	0.03193	0.09935	0.000782114	0.00165
	0.03203	0.09962	0.000784501	0.00166
	0.03212	0.0999	0.000786895	0.00166
	0.03222	0.10018	0.000789296	0.00166
	0.03232	0.10046	0.000791705	0.00167
	0.03242	0.10074	0.000794121	0.00167
	0.03252	0.10102	0.000796544	0.00168
	0.03262	0.1013	0.000798975	0.00168
	0.03272	0.10158	0.000801413	0.00169
	0.03282	0.10186	0.000803858	0.00169
	0.03292	0.10215	0.000806311	0.0017
	0.03302	0.10243	0.000808771	0.0017
	0.03313	0.10271	0.000811239	0.00171
	0.03323	0.103	0.000813714	0.00172
	0.03333	0.10328	0.000816196	0.00172
	0.03343	0.10357	0.000818686	0.00173
	0.03354	0.10386	0.000821184	0.00173
	0.03364	0.10415	0.000823689	0.00174
	0.03374	0.10444	0.000826202	0.00174
	0.03385	0.10473	0.000828722	0.00175
	0.03395	0.10502	0.00083125	0.00175
	0.03405	0.10531	0.000833786	0.00176
	0.03416	0.1056	0.000836329	0.00176
	0.03426	0.10589	0.00083888	0.00177
	0.03437	0.10618	0.000841439	0.00177
	0.03448	0.10648	0.000844005	0.00178
	0.03458	0.10677	0.000846579	0.00178
	0.03469	0.10707	0.000849161	0.00179
	0.03479	0.10736	0.000851751	0.00179
	0.0349	0.10766	0.000854349	0.0018
	0.03501	0.10796	0.000856954	0.0018
	0.03512	0.10825	0.000859567	0.00181
	0.03522	0.10855	0.000862189	0.00181
	0.03533	0.10885	0.000864818	0.00182
	0.03544	0.10915	0.000867455	0.00182
	0.03555	0.10945	0.0008701	0.00183
	0.03566	0.10976	0.000872753	0.00184
	0.03577	0.11006	0.000875414	0.00184
	0.03588	0.11036	0.000878083	0.00185
	0.03599	0.11067	0.000880761	0.00185
	0.0361	0.11097	0.000883446	0.00186
	0.03621	0.11128	0.000886139	0.00186
	0.03632	0.11158	0.000888841	0.00187
	0.03644	0.11189	0.000891551	0.00187
	0.03655	0.1122	0.000894269	0.00188
	0.03666	0.11251	0.000896995	0.00189
	0.03677	0.11281	0.000899729	0.00189
	0.03689	0.11312	0.000902472	0.0019
	0.037	0.11344	0.000905223	0.0019
	0.03711	0.11375	0.000907982	0.00191
	0.03723	0.11406	0.000910749	0.00191
	0.03734	0.11437	0.000913525	0.00192
	0.03746	0.11469	0.000916309	0.00192
	0.03757	0.115	0.000919102	0.00193
	0.03769	0.11532	0.000921903	0.00194
	0.0378	0.11563	0.000924713	0.00194
	0.03792	0.11595	0.000927531	0.00195
	0.03804	0.11627	0.000930358	0.00195
	0.03815	0.11658	0.000933193	0.00196
	0.03827	0.1169	0.000936036	0.00196
	0.03839	0.11722	0.000938889	0.00197
	0.03851	0.11754	0.000941749	0.00198
	0.03862	0.11786	0.000944619	0.00198
	0.03874	0.11819	0.000947497	0.00199
	0.03886	0.11851	0.000950384	0.00199
	0.03898	0.11883	0.000953279	0.002
	0.0391	0.11916	0.000956184	0.00201
	0.03922	0.11948	0.000959097	0.00201
	0.03934	0.11981	0.000962019	0.00202
	0.03946	0.12014	0.000964949	0.00202
	0.03959	0.12046	0.000967889	0.00203
	0.03971	0.12079	0.000970837	0.00204
	0.03983	0.12112	0.000973794	0.00204
	0.03995	0.12145	0.00097676	0.00205
	0.04007	0.12178	0.000979736	0.00205
	0.0402	0.12211	0.00098272	0.00206
	0.04032	0.12244	0.000985713	0.00207
	0.04045	0.12278	0.000988715	0.00207
	0.04057	0.12311	0.000991726	0.00208
	0.04069	0.12345	0.000994746	0.00208
	0.04082	0.12378	0.000997776	0.00209
	0.04095	0.12412	0.001	0.0021
	0.04107	0.12445	0.001	0.0021
	0.0412	0.12479	0.00101	0.00211
	0.04132	0.12513	0.00101	0.00211
	0.04145	0.12547	0.00101	0.00212
	0.04158	0.12581	0.00102	0.00213
	0.04171	0.12615	0.00102	0.00213
	0.04184	0.12649	0.00102	0.00214
	0.04196	0.12683	0.00103	0.00215
	0.04209	0.12718	0.00103	0.00215
	0.04222	0.12752	0.00103	0.00216
	0.04235	0.12787	0.00103	0.00217
	0.04248	0.12821	0.00104	0.00217
	0.04261	0.12856	0.00104	0.00218
	0.04274	0.12891	0.00104	0.00218
	0.04288	0.12925	0.00105	0.00219
	0.04301	0.1296	0.00105	0.0022
	0.04314	0.12995	0.00105	0.0022
	0.04327	0.1303	0.00106	0.00221
	0.04341	0.13066	0.00106	0.00222
	0.04354	0.13101	0.00106	0.00222
	0.04367	0.13136	0.00107	0.00223
	0.04381	0.13171	0.00107	0.00224
	0.04394	0.13207	0.00107	0.00224
	0.04408	0.13242	0.00108	0.00225
	0.04421	0.13278	0.00108	0.00226
	0.04435	0.13314	0.00108	0.00226
	0.04449	0.1335	0.00109	0.00227
	0.04462	0.13385	0.00109	0.00228
	0.04476	0.13421	0.00109	0.00228
	0.0449	0.13457	0.0011	0.00229
	0.04504	0.13494	0.0011	0.0023
	0.04517	0.1353	0.0011	0.0023
	0.04531	0.13566	0.00111	0.00231
	0.04545	0.13602	0.00111	0.00232
	0.04559	0.13639	0.00111	0.00232
	0.04573	0.13675	0.00112	0.00233
	0.04587	0.13712	0.00112	0.00234
	0.04601	0.13749	0.00112	0.00234
	0.04616	0.13785	0.00113	0.00235
	0.0463	0.13822	0.00113	0.00236
	0.04644	0.13859	0.00113	0.00236
	0.04658	0.13896	0.00114	0.00237
	0.04673	0.13933	0.00114	0.00238
	0.04687	0.13971	0.00114	0.00238
	0.04701	0.14008	0.00115	0.00239
	0.04716	0.14045	0.00115	0.0024
	0.0473	0.14083	0.00115	0.00241
	0.04745	0.1412	0.00116	0.00241
	0.04759	0.14158	0.00116	0.00242
	0.04774	0.14196	0.00116	0.00243
	0.04789	0.14233	0.00117	0.00243
	0.04804	0.14271	0.00117	0.00244
	0.04818	0.14309	0.00118	0.00245
	0.04833	0.14347	0.00118	0.00246
	0.04848	0.14385	0.00118	0.00246
	0.04863	0.14424	0.00119	0.00247
	0.04878	0.14462	0.00119	0.00248
	0.04893	0.145	0.00119	0.00248
	0.04908	0.14539	0.0012	0.00249
	0.04923	0.14577	0.0012	0.0025
	0.04938	0.14616	0.0012	0.00251
	0.04953	0.14655	0.00121	0.00251
	0.04969	0.14694	0.00121	0.00252
	0.04984	0.14733	0.00122	0.00253
	0.04999	0.14772	0.00122	0.00254
	0.05015	0.14811	0.00122	0.00254
	0.0503	0.1485	0.00123	0.00255
	0.05045	0.14889	0.00123	0.00256
	0.05061	0.14928	0.00123	0.00257
	0.05077	0.14968	0.00124	0.00257
	0.05092	0.15007	0.00124	0.00258
	0.05108	0.15047	0.00125	0.00259
	0.05124	0.15087	0.00125	0.0026
	0.05139	0.15126	0.00125	0.0026
	0.05155	0.15166	0.00126	0.00261
	0.05171	0.15206	0.00126	0.00262
	0.05187	0.15246	0.00126	0.00263
	0.05203	0.15286	0.00127	0.00263
	0.05219	0.15327	0.00127	0.00264
	0.05235	0.15367	0.00128	0.00265
	0.05251	0.15407	0.00128	0.00266
	0.05267	0.15448	0.00128	0.00266
	0.05283	0.15488	0.00129	0.00267
	0.053	0.15529	0.00129	0.00268
	0.05316	0.1557	0.0013	0.00269
	0.05332	0.15611	0.0013	0.00269
	0.05349	0.15652	0.0013	0.0027
	0.05365	0.15693	0.00131	0.00271
	0.05382	0.15734	0.00131	0.00272
	0.05398	0.15775	0.00132	0.00273
	0.05415	0.15816	0.00132	0.00273
	0.05431	0.15857	0.00132	0.00274
	0.05448	0.15899	0.00133	0.00275
	0.05465	0.1594	0.00133	0.00276
	0.05482	0.15982	0.00134	0.00277
	0.05499	0.16024	0.00134	0.00277
	0.05515	0.16066	0.00134	0.00278
	0.05532	0.16108	0.00135	0.00279
	0.05549	0.1615	0.00135	0.0028
	0.05566	0.16192	0.00136	0.00281
	0.05584	0.16234	0.00136	0.00281
	0.05601	0.16276	0.00136	0.00282
	0.05618	0.16318	0.00137	0.00283
	0.05635	0.16361	0.00137	0.00284
	0.05653	0.16403	0.00138	0.00285
	0.0567	0.16446	0.00138	0.00286
	0.05687	0.16489	0.00138	0.00286
	0.05705	0.16531	0.00139	0.00287
	0.05723	0.16574	0.00139	0.00288
	0.0574	0.16617	0.0014	0.00289
	0.05758	0.1666	0.0014	0.0029
	0.05775	0.16704	0.00141	0.00291
	0.05793	0.16747	0.00141	0.00291
	0.05811	0.1679	0.00141	0.00292
	0.05829	0.16834	0.00142	0.00293
	0.05847	0.16877	0.00142	0.00294
	0.05865	0.16921	0.00143	0.00295
	0.05883	0.16964	0.00143	0.00296
	0.05901	0.17008	0.00144	0.00296
	0.05919	0.17052	0.00144	0.00297
	0.05937	0.17096	0.00144	0.00298
	0.05956	0.1714	0.00145	0.00299
	0.05974	0.17184	0.00145	0.003
	0.05992	0.17229	0.00146	0.00301
	0.06011	0.17273	0.00146	0.00302
	0.06029	0.17317	0.00147	0.00303
	0.06048	0.17362	0.00147	0.00303
	0.06066	0.17407	0.00148	0.00304
	0.06085	0.17451	0.00148	0.00305
	0.06104	0.17496	0.00148	0.00306
	0.06123	0.17541	0.00149	0.00307
	0.06141	0.17586	0.00149	0.00308
	0.0616	0.17631	0.0015	0.00309
	0.06179	0.17676	0.0015	0.0031
	0.06198	0.17722	0.00151	0.0031
	0.06217	0.17767	0.00151	0.00311
	0.06236	0.17812	0.00152	0.00312
	0.06256	0.17858	0.00152	0.00313
	0.06275	0.17904	0.00153	0.00314
	0.06294	0.17949	0.00153	0.00315
	0.06313	0.17995	0.00153	0.00316
	0.06333	0.18041	0.00154	0.00317
	0.06352	0.18087	0.00154	0.00318
	0.06372	0.18133	0.00155	0.00319
	0.06391	0.18179	0.00155	0.0032
	0.06411	0.18226	0.00156	0.0032
	0.06431	0.18272	0.00156	0.00321
	0.06451	0.18319	0.00157	0.00322
	0.0647	0.18365	0.00157	0.00323
	0.0649	0.18412	0.00158	0.00324
	0.0651	0.18459	0.00158	0.00325
	0.0653	0.18505	0.00159	0.00326
	0.0655	0.18552	0.00159	0.00327
	0.06571	0.18599	0.0016	0.00328
	0.06591	0.18647	0.0016	0.00329
	0.06611	0.18694	0.00161	0.0033
	0.06631	0.18741	0.00161	0.00331
	0.06652	0.18789	0.00162	0.00332
	0.06672	0.18836	0.00162	0.00333
	0.06693	0.18884	0.00163	0.00334
	0.06713	0.18931	0.00163	0.00335
	0.06734	0.18979	0.00164	0.00335
	0.06755	0.19027	0.00164	0.00336
	0.06776	0.19075	0.00165	0.00337
	0.06796	0.19123	0.00165	0.00338
	0.06817	0.19171	0.00166	0.00339
	0.06838	0.1922	0.00166	0.0034
	0.06859	0.19268	0.00167	0.00341
	0.0688	0.19316	0.00167	0.00342
	0.06902	0.19365	0.00168	0.00343
	0.06923	0.19414	0.00168	0.00344
	0.06944	0.19462	0.00169	0.00345
	0.06965	0.19511	0.00169	0.00346
	0.06987	0.1956	0.0017	0.00347
	0.07008	0.19609	0.0017	0.00348
	0.0703	0.19658	0.00171	0.00349
	0.07052	0.19708	0.00171	0.0035
	0.07073	0.19757	0.00172	0.00351
	0.07095	0.19806	0.00172	0.00352
	0.07117	0.19856	0.00173	0.00353
	0.07139	0.19905	0.00173	0.00354
	0.07161	0.19955	0.00174	0.00355
	0.07183	0.20005	0.00174	0.00356
	0.07205	0.20055	0.00175	0.00357
	0.07227	0.20105	0.00175	0.00358
	0.07249	0.20155	0.00176	0.00359
	0.07271	0.20205	0.00176	0.0036
	0.07294	0.20255	0.00177	0.00361
	0.07316	0.20306	0.00177	0.00362
	0.07339	0.20356	0.00178	0.00363
	0.07361	0.20407	0.00179	0.00364
	0.07384	0.20457	0.00179	0.00365
	0.07407	0.20508	0.0018	0.00366
	0.07429	0.20559	0.0018	0.00368
	0.07452	0.2061	0.00181	0.00369
	0.07475	0.20661	0.00181	0.0037
	0.07498	0.20712	0.00182	0.00371
	0.07521	0.20763	0.00182	0.00372
	0.07544	0.20814	0.00183	0.00373
	0.07568	0.20866	0.00183	0.00374
	0.07591	0.20917	0.00184	0.00375
	0.07614	0.20969	0.00185	0.00376
	0.07638	0.21021	0.00185	0.00377
	0.07661	0.21072	0.00186	0.00378
	0.07685	0.21124	0.00186	0.00379
	0.07708	0.21176	0.00187	0.0038
	0.07732	0.21228	0.00187	0.00381
	0.07756	0.21281	0.00188	0.00382
	0.0778	0.21333	0.00188	0.00383
	0.07804	0.21385	0.00189	0.00385
	0.07828	0.21438	0.0019	0.00386
	0.07852	0.2149	0.0019	0.00387
	0.07876	0.21543	0.00191	0.00388
	0.079	0.21596	0.00191	0.00389
	0.07924	0.21648	0.00192	0.0039
	0.07949	0.21701	0.00192	0.00391
	0.07973	0.21754	0.00193	0.00392
	0.07998	0.21808	0.00194	0.00393
	0.08022	0.21861	0.00194	0.00394
	0.08047	0.21914	0.00195	0.00396
	0.08072	0.21968	0.00195	0.00397
	0.08097	0.22021	0.00196	0.00398
	0.08122	0.22075	0.00197	0.00399
	0.08146	0.22128	0.00197	0.004
	0.08172	0.22182	0.00198	0.00401
	0.08197	0.22236	0.00198	0.00402
	0.08222	0.2229	0.00199	0.00403
	0.08247	0.22344	0.002	0.00405
	0.08273	0.22398	0.002	0.00406
	0.08298	0.22453	0.00201	0.00407
	0.08324	0.22507	0.00201	0.00408
	0.08349	0.22562	0.00202	0.00409
	0.08375	0.22616	0.00203	0.0041
	0.08401	0.22671	0.00203	0.00411
	0.08426	0.22726	0.00204	0.00413
	0.08452	0.22781	0.00204	0.00414
	0.08478	0.22835	0.00205	0.00415
	0.08504	0.22891	0.00206	0.00416
	0.08531	0.22946	0.00206	0.00417
	0.08557	0.23001	0.00207	0.00418
	0.08583	0.23056	0.00208	0.0042
	0.0861	0.23112	0.00208	0.00421
	0.08636	0.23167	0.00209	0.00422
	0.08663	0.23223	0.00209	0.00423
	0.08689	0.23279	0.0021	0.00424
	0.08716	0.23334	0.00211	0.00426
	0.08743	0.2339	0.00211	0.00427
	0.0877	0.23446	0.00212	0.00428
	0.08797	0.23503	0.00213	0.00429
	0.08824	0.23559	0.00213	0.0043
	0.08851	0.23615	0.00214	0.00432
	0.08878	0.23671	0.00215	0.00433
	0.08905	0.23728	0.00215	0.00434
	0.08933	0.23785	0.00216	0.00435
	0.0896	0.23841	0.00216	0.00436
	0.08988	0.23898	0.00217	0.00438
	0.09015	0.23955	0.00218	0.00439
	0.09043	0.24012	0.00218	0.0044
	0.09071	0.24069	0.00219	0.00441
	0.09099	0.24126	0.0022	0.00443
	0.09127	0.24183	0.0022	0.00444
	0.09155	0.24241	0.00221	0.00445
	0.09183	0.24298	0.00222	0.00446
	0.09211	0.24356	0.00222	0.00448
	0.0924	0.24413	0.00223	0.00449
	0.09268	0.24471	0.00224	0.0045
	0.09297	0.24529	0.00224	0.00451
	0.09325	0.24587	0.00225	0.00453
	0.09354	0.24645	0.00226	0.00454
	0.09383	0.24703	0.00226	0.00455
	0.09411	0.24761	0.00227	0.00456
	0.0944	0.2482	0.00228	0.00458
	0.09469	0.24878	0.00228	0.00459
	0.09499	0.24937	0.00229	0.0046
	0.09528	0.24995	0.0023	0.00461
	0.09557	0.25054	0.00231	0.00463
	0.09587	0.25113	0.00231	0.00464
	0.09616	0.25172	0.00232	0.00465
	0.09646	0.25231	0.00233	0.00467
	0.09675	0.2529	0.00233	0.00468
	0.09705	0.25349	0.00234	0.00469
	0.09735	0.25408	0.00235	0.00471
	0.09765	0.25467	0.00235	0.00472
	0.09795	0.25527	0.00236	0.00473
	0.09825	0.25586	0.00237	0.00474
	0.09855	0.25646	0.00238	0.00476
	0.09885	0.25706	0.00238	0.00477
	0.09916	0.25766	0.00239	0.00478
	0.09946	0.25826	0.0024	0.0048
	0.09977	0.25886	0.0024	0.00481
	0.10008	0.25946	0.00241	0.00482
	0.10038	0.26006	0.00242	0.00484
	0.10069	0.26066	0.00243	0.00485
	0.101	0.26127	0.00243	0.00486
	0.10131	0.26187	0.00244	0.00488
	0.10163	0.26248	0.00245	0.00489
	0.10194	0.26308	0.00246	0.00491
	0.10225	0.26369	0.00246	0.00492
	0.10257	0.2643	0.00247	0.00493
	0.10288	0.26491	0.00248	0.00495
	0.1032	0.26552	0.00248	0.00496
	0.10352	0.26613	0.00249	0.00497
	0.10383	0.26674	0.0025	0.00499
	0.10415	0.26736	0.00251	0.005
	0.10447	0.26797	0.00251	0.00501
	0.10479	0.26859	0.00252	0.00503
	0.10512	0.2692	0.00253	0.00504
	0.10544	0.26982	0.00254	0.00506
	0.10576	0.27044	0.00255	0.00507
	0.10609	0.27106	0.00255	0.00508
	0.10642	0.27168	0.00256	0.0051
	0.10674	0.2723	0.00257	0.00511
	0.10707	0.27292	0.00258	0.00513
	0.1074	0.27354	0.00258	0.00514
	0.10773	0.27417	0.00259	0.00515
	0.10806	0.27479	0.0026	0.00517
	0.1084	0.27542	0.00261	0.00518
	0.10873	0.27604	0.00261	0.0052
	0.10906	0.27667	0.00262	0.00521
	0.1094	0.2773	0.00263	0.00523
	0.10974	0.27793	0.00264	0.00524
	0.11007	0.27856	0.00265	0.00525
	0.11041	0.27919	0.00265	0.00527
	0.11075	0.27982	0.00266	0.00528
	0.11109	0.28045	0.00267	0.0053
	0.11143	0.28109	0.00268	0.00531
	0.11178	0.28172	0.00269	0.00533
	0.11212	0.28236	0.00269	0.00534
	0.11246	0.28299	0.0027	0.00536
	0.11281	0.28363	0.00271	0.00537
	0.11316	0.28427	0.00272	0.00539
	0.11351	0.28491	0.00273	0.0054
	0.11386	0.28555	0.00273	0.00541
	0.11421	0.28619	0.00274	0.00543
	0.11456	0.28683	0.00275	0.00544
	0.11491	0.28747	0.00276	0.00546
	0.11526	0.28812	0.00277	0.00547
	0.11562	0.28876	0.00278	0.00549
	0.11597	0.28941	0.00278	0.0055
	0.11633	0.29005	0.00279	0.00552
	0.11669	0.2907	0.0028	0.00553
	0.11705	0.29135	0.00281	0.00555
	0.11741	0.292	0.00282	0.00556
	0.11777	0.29265	0.00283	0.00558
	0.11813	0.2933	0.00283	0.00559
	0.11849	0.29395	0.00284	0.00561
	0.11886	0.2946	0.00285	0.00563
	0.11922	0.29526	0.00286	0.00564
	0.11959	0.29591	0.00287	0.00566
	0.11996	0.29657	0.00288	0.00567
	0.12033	0.29722	0.00289	0.00569
	0.1207	0.29788	0.00289	0.0057
	0.12107	0.29854	0.0029	0.00572
	0.12144	0.2992	0.00291	0.00573
	0.12181	0.29986	0.00292	0.00575
	0.12219	0.30052	0.00293	0.00576
	0.12256	0.30118	0.00294	0.00578
	0.12294	0.30184	0.00295	0.0058
	0.12332	0.30251	0.00296	0.00581
	0.1237	0.30317	0.00296	0.00583
	0.12408	0.30384	0.00297	0.00584
	0.12446	0.3045	0.00298	0.00586
	0.12484	0.30517	0.00299	0.00587
	0.12523	0.30584	0.003	0.00589
	0.12561	0.3065	0.00301	0.00591
	0.126	0.30717	0.00302	0.00592
	0.12639	0.30784	0.00303	0.00594
	0.12678	0.30851	0.00304	0.00595
	0.12717	0.30919	0.00304	0.00597
	0.12756	0.30986	0.00305	0.00599
	0.12795	0.31053	0.00306	0.006
	0.12834	0.31121	0.00307	0.00602
	0.12874	0.31188	0.00308	0.00604
	0.12913	0.31256	0.00309	0.00605
	0.12953	0.31324	0.0031	0.00607
	0.12993	0.31391	0.00311	0.00608
	0.13033	0.31459	0.00312	0.0061
	0.13073	0.31527	0.00313	0.00612
	0.13113	0.31595	0.00314	0.00613
	0.13153	0.31663	0.00315	0.00615
	0.13194	0.31732	0.00316	0.00617
	0.13234	0.318	0.00316	0.00618
	0.13275	0.31868	0.00317	0.0062
	0.13316	0.31937	0.00318	0.00622
	0.13357	0.32005	0.00319	0.00623
	0.13398	0.32074	0.0032	0.00625
	0.13439	0.32143	0.00321	0.00627
	0.13481	0.32212	0.00322	0.00628
	0.13522	0.3228	0.00323	0.0063
	0.13564	0.32349	0.00324	0.00632
	0.13605	0.32418	0.00325	0.00633
	0.13647	0.32488	0.00326	0.00635
	0.13689	0.32557	0.00327	0.00637
	0.13731	0.32626	0.00328	0.00638
	0.13774	0.32695	0.00329	0.0064
	0.13816	0.32765	0.0033	0.00642
	0.13858	0.32834	0.00331	0.00644
	0.13901	0.32904	0.00332	0.00645
	0.13944	0.32974	0.00333	0.00647
	0.13987	0.33044	0.00334	0.00649
	0.1403	0.33113	0.00335	0.00651
	0.14073	0.33183	0.00336	0.00652
	0.14116	0.33253	0.00337	0.00654
	0.1416	0.33323	0.00338	0.00656
	0.14203	0.33394	0.00339	0.00657
	0.14247	0.33464	0.0034	0.00659
	0.14291	0.33534	0.00341	0.00661
	0.14335	0.33605	0.00342	0.00663
	0.14379	0.33675	0.00343	0.00664
	0.14423	0.33746	0.00344	0.00666
	0.14467	0.33816	0.00345	0.00668
	0.14512	0.33887	0.00346	0.0067
	0.14556	0.33958	0.00347	0.00672
	0.14601	0.34029	0.00348	0.00673
	0.14646	0.341	0.00349	0.00675
	0.14691	0.34171	0.0035	0.00677
	0.14736	0.34242	0.00351	0.00679
	0.14782	0.34313	0.00352	0.00681
	0.14827	0.34385	0.00353	0.00682
	0.14873	0.34456	0.00354	0.00684
	0.14918	0.34527	0.00355	0.00686
	0.14964	0.34599	0.00356	0.00688
	0.1501	0.3467	0.00357	0.0069
	0.15057	0.34742	0.00358	0.00691
	0.15103	0.34814	0.0036	0.00693
	0.15149	0.34886	0.00361	0.00695
	0.15196	0.34958	0.00362	0.00697
	0.15243	0.3503	0.00363	0.00699
	0.1529	0.35102	0.00364	0.00701
	0.15337	0.35174	0.00365	0.00702
	0.15384	0.35246	0.00366	0.00704
	0.15431	0.35318	0.00367	0.00706
	0.15479	0.3539	0.00368	0.00708
	0.15526	0.35463	0.00369	0.0071
	0.15574	0.35535	0.0037	0.00712
	0.15622	0.35608	0.00371	0.00714
	0.1567	0.35681	0.00373	0.00715
	0.15718	0.35753	0.00374	0.00717
	0.15766	0.35826	0.00375	0.00719
	0.15815	0.35899	0.00376	0.00721
	0.15864	0.35972	0.00377	0.00723
	0.15912	0.36045	0.00378	0.00725
	0.15961	0.36118	0.00379	0.00727
	0.1601	0.36191	0.0038	0.00729
	0.1606	0.36264	0.00381	0.00731
	0.16109	0.36337	0.00383	0.00732
	0.16159	0.36411	0.00384	0.00734
	0.16208	0.36484	0.00385	0.00736
	0.16258	0.36558	0.00386	0.00738
	0.16308	0.36631	0.00387	0.0074
	0.16358	0.36705	0.00388	0.00742
	0.16409	0.36779	0.00389	0.00744
	0.16459	0.36852	0.00391	0.00746
	0.1651	0.36926	0.00392	0.00748
	0.1656	0.37	0.00393	0.0075
	0.16611	0.37074	0.00394	0.00752
	0.16663	0.37148	0.00395	0.00754
	0.16714	0.37222	0.00396	0.00756
	0.16765	0.37296	0.00398	0.00758
	0.16817	0.37371	0.00399	0.0076
	0.16868	0.37445	0.004	0.00762
	0.1692	0.37519	0.00401	0.00764
	0.16972	0.37594	0.00402	0.00766
	0.17025	0.37668	0.00403	0.00768
	0.17077	0.37743	0.00405	0.0077
	0.17129	0.37818	0.00406	0.00772
	0.17182	0.37892	0.00407	0.00774
	0.17235	0.37967	0.00408	0.00776
	0.17288	0.38042	0.00409	0.00778
	0.17341	0.38117	0.00411	0.0078
	0.17395	0.38192	0.00412	0.00782
	0.17448	0.38267	0.00413	0.00784
	0.17502	0.38342	0.00414	0.00786
	0.17556	0.38417	0.00416	0.00788
	0.1761	0.38492	0.00417	0.0079
	0.17664	0.38568	0.00418	0.00792
	0.17718	0.38643	0.00419	0.00794
	0.17773	0.38718	0.0042	0.00796
	0.17827	0.38794	0.00422	0.00798
	0.17882	0.38869	0.00423	0.008
	0.17937	0.38945	0.00424	0.00802
	0.17992	0.39021	0.00425	0.00804
	0.18048	0.39096	0.00427	0.00806
	0.18103	0.39172	0.00428	0.00808
	0.18159	0.39248	0.00429	0.0081
	0.18215	0.39324	0.0043	0.00812
	0.18271	0.394	0.00432	0.00814
	0.18327	0.39476	0.00433	0.00816
	0.18383	0.39552	0.00434	0.00819
	0.1844	0.39628	0.00436	0.00821
	0.18496	0.39704	0.00437	0.00823
	0.18553	0.39781	0.00438	0.00825
	0.1861	0.39857	0.00439	0.00827
	0.18668	0.39933	0.00441	0.00829
	0.18725	0.4001	0.00442	0.00831
	0.18783	0.40086	0.00443	0.00833
	0.1884	0.40163	0.00445	0.00835
	0.18898	0.40239	0.00446	0.00838
	0.18957	0.40316	0.00447	0.0084
	0.19015	0.40393	0.00449	0.00842
	0.19073	0.40469	0.0045	0.00844
	0.19132	0.40546	0.00451	0.00846
	0.19191	0.40623	0.00452	0.00848
	0.1925	0.407	0.00454	0.0085
	0.19309	0.40777	0.00455	0.00853
	0.19368	0.40854	0.00456	0.00855
	0.19428	0.40931	0.00458	0.00857
	0.19488	0.41008	0.00459	0.00859
	0.19548	0.41086	0.00461	0.00861
	0.19608	0.41163	0.00462	0.00863
	0.19668	0.4124	0.00463	0.00866
	0.19729	0.41318	0.00465	0.00868
	0.19789	0.41395	0.00466	0.0087
	0.1985	0.41473	0.00467	0.00872
	0.19911	0.4155	0.00469	0.00874
	0.19973	0.41628	0.0047	0.00877
	0.20034	0.41705	0.00471	0.00879
	0.20096	0.41783	0.00473	0.00881
	0.20157	0.41861	0.00474	0.00883
	0.20219	0.41938	0.00476	0.00885
	0.20282	0.42016	0.00477	0.00888
	0.20344	0.42094	0.00478	0.0089
	0.20407	0.42172	0.0048	0.00892
	0.20469	0.4225	0.00481	0.00894
	0.20532	0.42328	0.00483	0.00897
	0.20595	0.42406	0.00484	0.00899
	0.20659	0.42484	0.00485	0.00901
	0.20722	0.42562	0.00487	0.00903
	0.20786	0.42641	0.00488	0.00906
	0.2085	0.42719	0.0049	0.00908
	0.20914	0.42797	0.00491	0.0091
	0.20978	0.42876	0.00493	0.00912
	0.21043	0.42954	0.00494	0.00915
	0.21108	0.43032	0.00495	0.00917
	0.21173	0.43111	0.00497	0.00919
	0.21238	0.43189	0.00498	0.00922
	0.21303	0.43268	0.005	0.00924
	0.21369	0.43347	0.00501	0.00926
	0.21434	0.43425	0.00503	0.00929
	0.215	0.43504	0.00504	0.00931
	0.21566	0.43583	0.00506	0.00933
	0.21633	0.43662	0.00507	0.00936
	0.21699	0.4374	0.00509	0.00938
	0.21766	0.43819	0.0051	0.0094
	0.21833	0.43898	0.00512	0.00942
	0.219	0.43977	0.00513	0.00945
	0.21967	0.44056	0.00515	0.00947
	0.22035	0.44135	0.00516	0.0095
	0.22103	0.44214	0.00518	0.00952
	0.22171	0.44293	0.00519	0.00954
	0.22239	0.44373	0.00521	0.00957
	0.22307	0.44452	0.00522	0.00959
	0.22376	0.44531	0.00524	0.00961
	0.22445	0.4461	0.00525	0.00964
	0.22514	0.4469	0.00527	0.00966
	0.22583	0.44769	0.00528	0.00968
	0.22653	0.44848	0.0053	0.00971
	0.22722	0.44928	0.00531	0.00973
	0.22792	0.45007	0.00533	0.00976
	0.22862	0.45087	0.00534	0.00978
	0.22933	0.45166	0.00536	0.0098
	0.23003	0.45246	0.00538	0.00983
	0.23074	0.45326	0.00539	0.00985
	0.23145	0.45405	0.00541	0.00988
	0.23216	0.45485	0.00542	0.0099
	0.23287	0.45565	0.00544	0.00993
	0.23359	0.45644	0.00545	0.00995
	0.23431	0.45724	0.00547	0.00997
	0.23503	0.45804	0.00549	0.01
	0.23575	0.45884	0.0055	0.01002
	0.23648	0.45964	0.00552	0.01005
	0.23721	0.46044	0.00553	0.01007
	0.23794	0.46124	0.00555	0.0101
	0.23867	0.46204	0.00557	0.01012
	0.2394	0.46284	0.00558	0.01015
	0.24014	0.46364	0.0056	0.01017
	0.24088	0.46444	0.00561	0.0102
	0.24162	0.46524	0.00563	0.01022
	0.24236	0.46604	0.00565	0.01024
	0.24311	0.46684	0.00566	0.01027
	0.24385	0.46764	0.00568	0.01029
	0.2446	0.46845	0.0057	0.01032
	0.24536	0.46925	0.00571	0.01034
	0.24611	0.47005	0.00573	0.01037
	0.24687	0.47086	0.00575	0.01039
	0.24763	0.47166	0.00576	0.01042
	0.24839	0.47246	0.00578	0.01045
	0.24915	0.47327	0.0058	0.01047
	0.24992	0.47407	0.00581	0.0105
	0.25069	0.47488	0.00583	0.01052
	0.25146	0.47568	0.00585	0.01055
	0.25223	0.47648	0.00586	0.01057
	0.25301	0.47729	0.00588	0.0106
	0.25379	0.4781	0.0059	0.01062
	0.25457	0.4789	0.00592	0.01065
	0.25535	0.47971	0.00593	0.01067
	0.25614	0.48051	0.00595	0.0107
	0.25692	0.48132	0.00597	0.01073
	0.25771	0.48213	0.00598	0.01075
	0.25851	0.48293	0.006	0.01078
	0.2593	0.48374	0.00602	0.0108
	0.2601	0.48455	0.00604	0.01083
	0.2609	0.48536	0.00605	0.01085
	0.2617	0.48616	0.00607	0.01088
	0.26251	0.48697	0.00609	0.01091
	0.26331	0.48778	0.00611	0.01093
	0.26412	0.48859	0.00612	0.01096
	0.26494	0.4894	0.00614	0.01098
	0.26575	0.4902	0.00616	0.01101
	0.26657	0.49101	0.00618	0.01104
	0.26739	0.49182	0.00619	0.01106
	0.26821	0.49263	0.00621	0.01109
	0.26904	0.49344	0.00623	0.01112
	0.26986	0.49425	0.00625	0.01114
	0.27069	0.49506	0.00627	0.01117
	0.27153	0.49587	0.00628	0.01119
	0.27236	0.49668	0.0063	0.01122
	0.2732	0.49749	0.00632	0.01125
	0.27404	0.4983	0.00634	0.01127
	0.27488	0.49911	0.00636	0.0113
	0.27573	0.49992	0.00638	0.01133
	0.27658	0.50073	0.00639	0.01135
	0.27743	0.50154	0.00641	0.01138
	0.27828	0.50235	0.00643	0.01141
	0.27914	0.50317	0.00645	0.01144
	0.27999	0.50398	0.00647	0.01146
	0.28086	0.50479	0.00649	0.01149
	0.28172	0.5056	0.00651	0.01152
	0.28259	0.50641	0.00652	0.01154
	0.28346	0.50722	0.00654	0.01157
	0.28433	0.50804	0.00656	0.0116
	0.2852	0.50885	0.00658	0.01162
	0.28608	0.50966	0.0066	0.01165
	0.28696	0.51047	0.00662	0.01168
	0.28784	0.51128	0.00664	0.01171
	0.28873	0.5121	0.00666	0.01173
	0.28961	0.51291	0.00668	0.01176
	0.29051	0.51372	0.00669	0.01179
	0.2914	0.51453	0.00671	0.01182
	0.2923	0.51535	0.00673	0.01184
	0.29319	0.51616	0.00675	0.01187
	0.2941	0.51697	0.00677	0.0119
	0.295	0.51778	0.00679	0.01193
	0.29591	0.5186	0.00681	0.01195
	0.29682	0.51941	0.00683	0.01198
	0.29773	0.52022	0.00685	0.01201
	0.29865	0.52104	0.00687	0.01204
	0.29957	0.52185	0.00689	0.01207
	0.30049	0.52266	0.00691	0.01209
	0.30141	0.52348	0.00693	0.01212
	0.30234	0.52429	0.00695	0.01215
	0.30327	0.5251	0.00697	0.01218
	0.3042	0.52592	0.00699	0.01221
	0.30514	0.52673	0.00701	0.01223
	0.30608	0.52754	0.00703	0.01226
	0.30702	0.52836	0.00705	0.01229
	0.30796	0.52917	0.00707	0.01232
	0.30891	0.52998	0.00709	0.01235
	0.30986	0.5308	0.00711	0.01237
	0.31081	0.53161	0.00713	0.0124
	0.31177	0.53242	0.00715	0.01243
	0.31273	0.53323	0.00717	0.01246
	0.31369	0.53405	0.00719	0.01249
	0.31465	0.53486	0.00721	0.01252
	0.31562	0.53567	0.00723	0.01255
	0.31659	0.53649	0.00725	0.01257
	0.31757	0.5373	0.00727	0.0126
	0.31854	0.53811	0.00729	0.01263
	0.31952	0.53893	0.00731	0.01266
	0.32051	0.53974	0.00734	0.01269
	0.32149	0.54055	0.00736	0.01272
	0.32248	0.54137	0.00738	0.01275
	0.32347	0.54218	0.0074	0.01278
	0.32447	0.54299	0.00742	0.01281
	0.32546	0.5438	0.00744	0.01283
	0.32647	0.54462	0.00746	0.01286
	0.32747	0.54543	0.00748	0.01289
	0.32848	0.54624	0.0075	0.01292
	0.32949	0.54705	0.00753	0.01295
	0.3305	0.54787	0.00755	0.01298
	0.33152	0.54868	0.00757	0.01301
	0.33254	0.54949	0.00759	0.01304
	0.33356	0.5503	0.00761	0.01307
	0.33459	0.55112	0.00763	0.0131
	0.33562	0.55193	0.00766	0.01313
	0.33665	0.55274	0.00768	0.01316
	0.33768	0.55355	0.0077	0.01319
	0.33872	0.55436	0.00772	0.01322
	0.33976	0.55517	0.00774	0.01325
	0.34081	0.55598	0.00776	0.01327
	0.34186	0.5568	0.00779	0.0133
	0.34291	0.55761	0.00781	0.01333
	0.34396	0.55842	0.00783	0.01336
	0.34502	0.55923	0.00785	0.01339
	0.34608	0.56004	0.00788	0.01342
	0.34715	0.56085	0.0079	0.01345
	0.34821	0.56166	0.00792	0.01348
	0.34929	0.56247	0.00794	0.01351
	0.35036	0.56328	0.00796	0.01354
	0.35144	0.56409	0.00799	0.01357
	0.35252	0.5649	0.00801	0.0136
	0.3536	0.56571	0.00803	0.01363
	0.35469	0.56652	0.00806	0.01366
	0.35578	0.56733	0.00808	0.01369
	0.35688	0.56814	0.0081	0.01372
	0.35797	0.56895	0.00812	0.01376
	0.35907	0.56976	0.00815	0.01379
	0.36018	0.57056	0.00817	0.01382
	0.36129	0.57137	0.00819	0.01385
	0.3624	0.57218	0.00822	0.01388
	0.36351	0.57299	0.00824	0.01391
	0.36463	0.5738	0.00826	0.01394
	0.36575	0.5746	0.00829	0.01397
	0.36688	0.57541	0.00831	0.014
	0.36801	0.57622	0.00833	0.01403
	0.36914	0.57702	0.00836	0.01406
	0.37027	0.57783	0.00838	0.01409
	0.37141	0.57864	0.0084	0.01412
	0.37256	0.57944	0.00843	0.01415
	0.3737	0.58025	0.00845	0.01418
	0.37485	0.58106	0.00847	0.01422
	0.376	0.58186	0.0085	0.01425
	0.37716	0.58267	0.00852	0.01428
	0.37832	0.58347	0.00855	0.01431
	0.37948	0.58428	0.00857	0.01434
	0.38065	0.58508	0.00859	0.01437
	0.38182	0.58588	0.00862	0.0144
	0.383	0.58669	0.00864	0.01443
	0.38417	0.58749	0.00867	0.01446
	0.38536	0.5883	0.00869	0.0145
	0.38654	0.5891	0.00872	0.01453
	0.38773	0.5899	0.00874	0.01456
	0.38892	0.5907	0.00877	0.01459
	0.39012	0.59151	0.00879	0.01462
	0.39132	0.59231	0.00881	0.01465
	0.39252	0.59311	0.00884	0.01468
	0.39373	0.59391	0.00886	0.01472
	0.39494	0.59471	0.00889	0.01475
	0.39616	0.59551	0.00891	0.01478
	0.39737	0.59631	0.00894	0.01481
	0.3986	0.59712	0.00896	0.01484
	0.39982	0.59791	0.00899	0.01487
	0.40105	0.59871	0.00901	0.01491
	0.40229	0.59951	0.00904	0.01494
	0.40352	0.60031	0.00906	0.01497
	0.40476	0.60111	0.00909	0.015
	0.40601	0.60191	0.00912	0.01503
	0.40726	0.60271	0.00914	0.01506
	0.40851	0.60351	0.00917	0.0151
	0.40977	0.6043	0.00919	0.01513
	0.41103	0.6051	0.00922	0.01516
	0.41229	0.6059	0.00924	0.01519
	0.41356	0.60669	0.00927	0.01523
	0.41483	0.60749	0.0093	0.01526
	0.41611	0.60828	0.00932	0.01529
	0.41739	0.60908	0.00935	0.01532
	0.41867	0.60987	0.00937	0.01535
	0.41996	0.61067	0.0094	0.01539
	0.42125	0.61146	0.00943	0.01542
	0.42255	0.61226	0.00945	0.01545
	0.42385	0.61305	0.00948	0.01548
	0.42515	0.61384	0.0095	0.01552
	0.42646	0.61463	0.00953	0.01555
	0.42777	0.61543	0.00956	0.01558
	0.42909	0.61622	0.00958	0.01561
	0.43041	0.61701	0.00961	0.01565
	0.43173	0.6178	0.00964	0.01568
	0.43306	0.61859	0.00966	0.01571
	0.43439	0.61938	0.00969	0.01574
	0.43573	0.62017	0.00972	0.01578
	0.43707	0.62096	0.00975	0.01581
	0.43841	0.62175	0.00977	0.01584
	0.43976	0.62254	0.0098	0.01588
	0.44111	0.62333	0.00983	0.01591
	0.44247	0.62411	0.00985	0.01594
	0.44383	0.6249	0.00988	0.01598
	0.44519	0.62569	0.00991	0.01601
	0.44656	0.62647	0.00994	0.01604
	0.44794	0.62726	0.00996	0.01607
	0.44931	0.62804	0.00999	0.01611
	0.4507	0.62883	0.01002	0.01614
	0.45208	0.62961	0.01005	0.01617
	0.45347	0.6304	0.01007	0.01621
	0.45487	0.63118	0.0101	0.01624
	0.45627	0.63197	0.01013	0.01627
	0.45767	0.63275	0.01016	0.01631
	0.45908	0.63353	0.01019	0.01634
	0.46049	0.63431	0.01021	0.01637
	0.46191	0.63509	0.01024	0.01641
	0.46333	0.63587	0.01027	0.01644
	0.46475	0.63665	0.0103	0.01647
	0.46618	0.63743	0.01033	0.01651
	0.46762	0.63821	0.01036	0.01654
	0.46905	0.63899	0.01038	0.01657
	0.4705	0.63977	0.01041	0.01661
	0.47194	0.64055	0.01044	0.01664
	0.4734	0.64133	0.01047	0.01668
	0.47485	0.6421	0.0105	0.01671
	0.47631	0.64288	0.01053	0.01674
	0.47778	0.64365	0.01056	0.01678
	0.47925	0.64443	0.01059	0.01681
	0.48072	0.6452	0.01062	0.01685
	0.4822	0.64598	0.01065	0.01688
	0.48368	0.64675	0.01067	0.01691
	0.48517	0.64753	0.0107	0.01695
	0.48666	0.6483	0.01073	0.01698
	0.48816	0.64907	0.01076	0.01701
	0.48966	0.64984	0.01079	0.01705
	0.49117	0.65061	0.01082	0.01708
	0.49268	0.65138	0.01085	0.01712
	0.49419	0.65215	0.01088	0.01715
	0.49571	0.65292	0.01091	0.01719
	0.49724	0.65369	0.01094	0.01722
	0.49877	0.65446	0.01097	0.01725
	0.5003	0.65523	0.011	0.01729
	0.50184	0.656	0.01103	0.01732
	0.50339	0.65676	0.01106	0.01736
	0.50493	0.65753	0.01109	0.01739
	0.50649	0.65829	0.01112	0.01743
	0.50804	0.65906	0.01115	0.01746
	0.50961	0.65982	0.01118	0.01749
	0.51117	0.66059	0.01121	0.01753
	0.51275	0.66135	0.01124	0.01756
	0.51432	0.66211	0.01127	0.0176
	0.51591	0.66288	0.01131	0.01763
	0.51749	0.66364	0.01134	0.01767
	0.51908	0.6644	0.01137	0.0177
	0.52068	0.66516	0.0114	0.01774
	0.52228	0.66592	0.01143	0.01777
	0.52389	0.66668	0.01146	0.01781
	0.5255	0.66744	0.01149	0.01784
	0.52712	0.66819	0.01152	0.01788
	0.52874	0.66895	0.01155	0.01791
	0.53037	0.66971	0.01159	0.01795
	0.532	0.67046	0.01162	0.01798
	0.53363	0.67122	0.01165	0.01802
	0.53527	0.67197	0.01168	0.01805
	0.53692	0.67273	0.01171	0.01809
	0.53857	0.67348	0.01174	0.01812
	0.54023	0.67424	0.01178	0.01816
	0.54189	0.67499	0.01181	0.01819
	0.54356	0.67574	0.01184	0.01823
	0.54523	0.67649	0.01187	0.01826
	0.54691	0.67724	0.0119	0.0183
	0.54859	0.67799	0.01194	0.01833
	0.55028	0.67874	0.01197	0.01837
	0.55197	0.67949	0.012	0.0184
	0.55367	0.68024	0.01203	0.01844
	0.55537	0.68098	0.01207	0.01847
	0.55708	0.68173	0.0121	0.01851
	0.55879	0.68248	0.01213	0.01854
	0.56051	0.68322	0.01216	0.01858
	0.56223	0.68397	0.0122	0.01861
	0.56396	0.68471	0.01223	0.01865
	0.5657	0.68545	0.01226	0.01868
	0.56744	0.68619	0.0123	0.01872
	0.56918	0.68694	0.01233	0.01875
	0.57093	0.68768	0.01236	0.01879
	0.57269	0.68842	0.0124	0.01883
	0.57445	0.68916	0.01243	0.01886
	0.57622	0.6899	0.01246	0.0189
	0.57799	0.69064	0.0125	0.01893
	0.57977	0.69137	0.01253	0.01897
	0.58155	0.69211	0.01256	0.019
	0.58334	0.69285	0.0126	0.01904
	0.58513	0.69358	0.01263	0.01907
	0.58693	0.69432	0.01267	0.01911
	0.58874	0.69505	0.0127	0.01915
	0.59055	0.69579	0.01273	0.01918
	0.59237	0.69652	0.01277	0.01922
	0.59419	0.69725	0.0128	0.01925
	0.59602	0.69798	0.01284	0.01929
	0.59785	0.69871	0.01287	0.01933
	0.59969	0.69944	0.01291	0.01936
	0.60153	0.70017	0.01294	0.0194
	0.60338	0.7009	0.01298	0.01943
	0.60524	0.70163	0.01301	0.01947
	0.6071	0.70236	0.01304	0.0195
	0.60897	0.70308	0.01308	0.01954
	0.61084	0.70381	0.01311	0.01958
	0.61272	0.70453	0.01315	0.01961
	0.61461	0.70526	0.01318	0.01965
	0.6165	0.70598	0.01322	0.01969
	0.61839	0.7067	0.01326	0.01972
	0.62029	0.70743	0.01329	0.01976
	0.6222	0.70815	0.01333	0.01979
	0.62412	0.70887	0.01336	0.01983
	0.62604	0.70959	0.0134	0.01987
	0.62796	0.71031	0.01343	0.0199
	0.62989	0.71102	0.01347	0.01994
	0.63183	0.71174	0.0135	0.01997
	0.63377	0.71246	0.01354	0.02001
	0.63572	0.71317	0.01358	0.02005
	0.63768	0.71389	0.01361	0.02008
	0.63964	0.7146	0.01365	0.02012
	0.64161	0.71532	0.01369	0.02016
	0.64358	0.71603	0.01372	0.02019
	0.64556	0.71674	0.01376	0.02023
	0.64755	0.71745	0.01379	0.02027
	0.64954	0.71816	0.01383	0.0203
	0.65154	0.71887	0.01387	0.02034
	0.65354	0.71958	0.0139	0.02037
	0.65555	0.72029	0.01394	0.02041
	0.65757	0.721	0.01398	0.02045
	0.65959	0.72171	0.01402	0.02048
	0.66162	0.72241	0.01405	0.02052
	0.66365	0.72312	0.01409	0.02056
	0.66569	0.72382	0.01413	0.02059
	0.66774	0.72453	0.01416	0.02063
	0.6698	0.72523	0.0142	0.02067
	0.67186	0.72593	0.01424	0.0207
	0.67392	0.72663	0.01428	0.02074
	0.67599	0.72733	0.01431	0.02078
	0.67807	0.72803	0.01435	0.02081
	0.68016	0.72873	0.01439	0.02085
	0.68225	0.72943	0.01443	0.02089
	0.68435	0.73012	0.01447	0.02092
	0.68646	0.73082	0.0145	0.02096
	0.68857	0.73152	0.01454	0.021
	0.69068	0.73221	0.01458	0.02103
	0.69281	0.7329	0.01462	0.02107
	0.69494	0.7336	0.01466	0.02111
	0.69708	0.73429	0.0147	0.02114
	0.69922	0.73498	0.01473	0.02118
	0.70137	0.73567	0.01477	0.02122
	0.70353	0.73636	0.01481	0.02125
	0.70569	0.73705	0.01485	0.02129
	0.70786	0.73774	0.01489	0.02133
	0.71004	0.73843	0.01493	0.02137
	0.71223	0.73911	0.01497	0.0214
	0.71442	0.7398	0.01501	0.02144
	0.71661	0.74048	0.01505	0.02148
	0.71882	0.74117	0.01509	0.02151
	0.72103	0.74185	0.01512	0.02155
	0.72325	0.74253	0.01516	0.02159
	0.72547	0.74321	0.0152	0.02162
	0.7277	0.74389	0.01524	0.02166
	0.72994	0.74457	0.01528	0.0217
	0.73219	0.74525	0.01532	0.02174
	0.73444	0.74593	0.01536	0.02177
	0.7367	0.74661	0.0154	0.02181
	0.73896	0.74728	0.01544	0.02185
	0.74124	0.74796	0.01548	0.02188
	0.74352	0.74864	0.01552	0.02192
	0.7458	0.74931	0.01556	0.02196
	0.7481	0.74998	0.0156	0.02199
	0.7504	0.75065	0.01565	0.02203
	0.75271	0.75133	0.01569	0.02207
	0.75502	0.752	0.01573	0.02211
	0.75734	0.75266	0.01577	0.02214
	0.75967	0.75333	0.01581	0.02218
	0.76201	0.754	0.01585	0.02222
	0.76435	0.75467	0.01589	0.02225
	0.7667	0.75533	0.01593	0.02229
	0.76906	0.756	0.01597	0.02233
	0.77143	0.75666	0.01601	0.02237
	0.7738	0.75733	0.01606	0.0224
	0.77618	0.75799	0.0161	0.02244
	0.77857	0.75865	0.01614	0.02248
	0.78096	0.75931	0.01618	0.02252
	0.78337	0.75997	0.01622	0.02255
	0.78578	0.76063	0.01626	0.02259
	0.78819	0.76129	0.01631	0.02263
	0.79062	0.76195	0.01635	0.02266
	0.79305	0.7626	0.01639	0.0227
	0.79549	0.76326	0.01643	0.02274
	0.79793	0.76391	0.01647	0.02278
	0.80039	0.76457	0.01652	0.02281
	0.80285	0.76522	0.01656	0.02285
	0.80532	0.76587	0.0166	0.02289
	0.8078	0.76652	0.01664	0.02293
	0.81028	0.76717	0.01669	0.02296
	0.81277	0.76782	0.01673	0.023
	0.81527	0.76847	0.01677	0.02304
	0.81778	0.76912	0.01682	0.02308
	0.8203	0.76976	0.01686	0.02311
	0.82282	0.77041	0.0169	0.02315
	0.82535	0.77105	0.01694	0.02319
	0.82789	0.7717	0.01699	0.02323
	0.83044	0.77234	0.01703	0.02326
	0.83299	0.77298	0.01707	0.0233
	0.83555	0.77362	0.01712	0.02334
	0.83812	0.77426	0.01716	0.02337
	0.8407	0.7749	0.01721	0.02341
	0.84329	0.77554	0.01725	0.02345
	0.84588	0.77618	0.01729	0.02349
	0.84848	0.77682	0.01734	0.02352
	0.85109	0.77745	0.01738	0.02356
	0.85371	0.77809	0.01743	0.0236
	0.85634	0.77872	0.01747	0.02364
	0.85897	0.77935	0.01751	0.02367
	0.86161	0.77999	0.01756	0.02371
	0.86426	0.78062	0.0176	0.02375
	0.86692	0.78125	0.01765	0.02379
	0.86959	0.78188	0.01769	0.02382
	0.87226	0.7825	0.01774	0.02386
	0.87494	0.78313	0.01778	0.0239
	0.87764	0.78376	0.01783	0.02394
	0.88034	0.78438	0.01787	0.02397
	0.88304	0.78501	0.01792	0.02401
	0.88576	0.78563	0.01796	0.02405
	0.88848	0.78625	0.01801	0.02409
	0.89122	0.78688	0.01805	0.02412
	0.89396	0.7875	0.0181	0.02416
	0.89671	0.78812	0.01815	0.0242
	0.89947	0.78874	0.01819	0.02424
	0.90223	0.78935	0.01824	0.02427
	0.90501	0.78997	0.01828	0.02431
	0.90779	0.79059	0.01833	0.02435
	0.91058	0.7912	0.01837	0.02439
	0.91338	0.79182	0.01842	0.02442
	0.91619	0.79243	0.01847	0.02446
	0.91901	0.79304	0.01851	0.0245
	0.92184	0.79366	0.01856	0.02454
	0.92467	0.79427	0.01861	0.02457
	0.92752	0.79488	0.01865	0.02461
	0.93037	0.79548	0.0187	0.02465
	0.93323	0.79609	0.01875	0.02469
	0.9361	0.7967	0.01879	0.02472
	0.93898	0.79731	0.01884	0.02476
	0.94187	0.79791	0.01889	0.0248
	0.94477	0.79851	0.01893	0.02484
	0.94767	0.79912	0.01898	0.02487
	0.95059	0.79972	0.01903	0.02491
	0.95351	0.80032	0.01908	0.02495
	0.95645	0.80092	0.01912	0.02499
	0.95939	0.80152	0.01917	0.02502
	0.96234	0.80212	0.01922	0.02506
	0.9653	0.80272	0.01927	0.0251
	0.96827	0.80331	0.01932	0.02514
	0.97125	0.80391	0.01936	0.02517
	0.97423	0.8045	0.01941	0.02521
	0.97723	0.8051	0.01946	0.02525
	0.98024	0.80569	0.01951	0.02529
	0.98325	0.80628	0.01956	0.02532
	0.98627	0.80687	0.0196	0.02536
	0.98931	0.80746	0.01965	0.0254
	0.99235	0.80805	0.0197	0.02544
	0.9954	0.80864	0.01975	0.02547
	0.99847	0.80923	0.0198	0.02551
	1.00154	0.80981	0.01985	0.02555
	1.00462	0.8104	0.0199	0.02559
	1.00771	0.81098	0.01995	0.02562
	1.01081	0.81157	0.02	0.02566
	1.01392	0.81215	0.02004	0.0257
	1.01703	0.81273	0.02009	0.02574
	1.02016	0.81331	0.02014	0.02577
	1.0233	0.81389	0.02019	0.02581
	1.02645	0.81447	0.02024	0.02585
	1.02961	0.81505	0.02029	0.02588
	1.03277	0.81562	0.02034	0.02592
	1.03595	0.8162	0.02039	0.02596
	1.03914	0.81677	0.02044	0.026
	1.04233	0.81735	0.02049	0.02603
	1.04554	0.81792	0.02054	0.02607
	1.04875	0.81849	0.02059	0.02611
	1.05198	0.81906	0.02064	0.02615
	1.05522	0.81963	0.02069	0.02618
	1.05846	0.8202	0.02074	0.02622
	1.06172	0.82077	0.02079	0.02626
	1.06498	0.82134	0.02084	0.0263
	1.06826	0.8219	0.0209	0.02633
	1.07154	0.82247	0.02095	0.02637
	1.07484	0.82303	0.021	0.02641
	1.07815	0.82359	0.02105	0.02644
	1.08146	0.82416	0.0211	0.02648
	1.08479	0.82472	0.02115	0.02652
	1.08813	0.82528	0.0212	0.02656
	1.09147	0.82584	0.02125	0.02659
	1.09483	0.8264	0.02131	0.02663
	1.0982	0.82695	0.02136	0.02667
	1.10157	0.82751	0.02141	0.0267
	1.10496	0.82807	0.02146	0.02674
	1.10836	0.82862	0.02151	0.02678
	1.11177	0.82917	0.02156	0.02682
	1.11519	0.82973	0.02162	0.02685
	1.11862	0.83028	0.02167	0.02689
	1.12206	0.83083	0.02172	0.02693
	1.12551	0.83138	0.02177	0.02696
	1.12897	0.83193	0.02183	0.027
	1.13245	0.83248	0.02188	0.02704
	1.13593	0.83302	0.02193	0.02708
	1.13942	0.83357	0.02198	0.02711
	1.14293	0.83411	0.02204	0.02715
	1.14644	0.83466	0.02209	0.02719
	1.14997	0.8352	0.02214	0.02722
	1.15351	0.83574	0.0222	0.02726
	1.15706	0.83628	0.02225	0.0273
	1.16062	0.83682	0.0223	0.02733
	1.16419	0.83736	0.02236	0.02737
	1.16777	0.8379	0.02241	0.02741
	1.17136	0.83844	0.02246	0.02745
	1.17496	0.83897	0.02252	0.02748
	1.17857	0.83951	0.02257	0.02752
	1.1822	0.84004	0.02262	0.02756
	1.18584	0.84058	0.02268	0.02759
	1.18948	0.84111	0.02273	0.02763
	1.19314	0.84164	0.02279	0.02767
	1.19681	0.84217	0.02284	0.0277
	1.20049	0.8427	0.02289	0.02774
	1.20419	0.84323	0.02295	0.02778
	1.20789	0.84376	0.023	0.02781
	1.21161	0.84428	0.02306	0.02785
	1.21533	0.84481	0.02311	0.02789
	1.21907	0.84534	0.02317	0.02792
	1.22282	0.84586	0.02322	0.02796
	1.22658	0.84638	0.02328	0.028
	1.23035	0.8469	0.02333	0.02803
	1.23414	0.84742	0.02339	0.02807
	1.23793	0.84794	0.02344	0.02811
	1.24174	0.84846	0.0235	0.02814
	1.24556	0.84898	0.02355	0.02818
	1.24939	0.8495	0.02361	0.02822
	1.25324	0.85002	0.02366	0.02825
	1.25709	0.85053	0.02372	0.02829
	1.26096	0.85104	0.02377	0.02833
	1.26484	0.85156	0.02383	0.02836
	1.26873	0.85207	0.02389	0.0284
	1.27263	0.85258	0.02394	0.02844
	1.27654	0.85309	0.024	0.02847
	1.28047	0.8536	0.02405	0.02851
	1.28441	0.85411	0.02411	0.02855
	1.28836	0.85462	0.02417	0.02858
	1.29232	0.85512	0.02422	0.02862
	1.2963	0.85563	0.02428	0.02866
	1.30028	0.85613	0.02434	0.02869
	1.30428	0.85664	0.02439	0.02873
	1.30829	0.85714	0.02445	0.02876
	1.31232	0.85764	0.02451	0.0288
	1.31636	0.85814	0.02456	0.02884
	1.3204	0.85864	0.02462	0.02887
	1.32447	0.85914	0.02468	0.02891
	1.32854	0.85964	0.02474	0.02895
	1.33263	0.86014	0.02479	0.02898
	1.33672	0.86063	0.02485	0.02902
	1.34084	0.86113	0.02491	0.02905
	1.34496	0.86162	0.02497	0.02909
	1.3491	0.86212	0.02502	0.02913
	1.35325	0.86261	0.02508	0.02916
	1.35741	0.8631	0.02514	0.0292
	1.36158	0.86359	0.0252	0.02923
	1.36577	0.86408	0.02525	0.02927
	1.36997	0.86457	0.02531	0.02931
	1.37419	0.86506	0.02537	0.02934
	1.37841	0.86554	0.02543	0.02938
	1.38265	0.86603	0.02549	0.02941
	1.38691	0.86651	0.02555	0.02945
	1.39117	0.867	0.0256	0.02949
	1.39545	0.86748	0.02566	0.02952
	1.39974	0.86796	0.02572	0.02956
	1.40405	0.86844	0.02578	0.02959
	1.40837	0.86892	0.02584	0.02963
	1.4127	0.8694	0.0259	0.02967
	1.41705	0.86988	0.02596	0.0297
	1.4214	0.87036	0.02602	0.02974
	1.42578	0.87083	0.02608	0.02977
	1.43016	0.87131	0.02614	0.02981
	1.43456	0.87178	0.0262	0.02984
	1.43897	0.87226	0.02625	0.02988
	1.4434	0.87273	0.02631	0.02992
	1.44784	0.8732	0.02637	0.02995
	1.45229	0.87367	0.02643	0.02999
	1.45676	0.87414	0.02649	0.03002
	1.46124	0.87461	0.02655	0.03006
	1.46573	0.87508	0.02661	0.03009
	1.47024	0.87554	0.02667	0.03013
	1.47477	0.87601	0.02673	0.03016
	1.4793	0.87647	0.02679	0.0302
	1.48385	0.87694	0.02685	0.03023
	1.48842	0.8774	0.02692	0.03027
	1.49299	0.87786	0.02698	0.03031
	1.49759	0.87832	0.02704	0.03034
	1.50219	0.87878	0.0271	0.03038
	1.50681	0.87924	0.02716	0.03041
	1.51145	0.8797	0.02722	0.03045
	1.5161	0.88016	0.02728	0.03048
	1.52076	0.88062	0.02734	0.03052
	1.52544	0.88107	0.0274	0.03055
	1.53013	0.88153	0.02746	0.03059
	1.53484	0.88198	0.02753	0.03062
	1.53956	0.88243	0.02759	0.03066
	1.54429	0.88288	0.02765	0.03069
	1.54904	0.88334	0.02771	0.03073
	1.55381	0.88379	0.02777	0.03076
	1.55859	0.88423	0.02783	0.0308
	1.56338	0.88468	0.0279	0.03083
	1.56819	0.88513	0.02796	0.03087
	1.57301	0.88558	0.02802	0.0309
	1.57785	0.88602	0.02808	0.03094
	1.5827	0.88647	0.02814	0.03097
	1.58757	0.88691	0.02821	0.03101
	1.59246	0.88735	0.02827	0.03104
	1.59735	0.8878	0.02833	0.03108
	1.60227	0.88824	0.02839	0.03111
	1.6072	0.88868	0.02846	0.03115
	1.61214	0.88911	0.02852	0.03118
	1.6171	0.88955	0.02858	0.03121
	1.62207	0.88999	0.02864	0.03125
	1.62706	0.89043	0.02871	0.03128
	1.63207	0.89086	0.02877	0.03132
	1.63709	0.8913	0.02883	0.03135
	1.64212	0.89173	0.0289	0.03139
	1.64717	0.89216	0.02896	0.03142
	1.65224	0.89259	0.02902	0.03146
	1.65732	0.89303	0.02909	0.03149
	1.66242	0.89346	0.02915	0.03152
	1.66753	0.89388	0.02921	0.03156
	1.67266	0.89431	0.02928	0.03159
	1.67781	0.89474	0.02934	0.03163
	1.68297	0.89517	0.02941	0.03166
	1.68814	0.89559	0.02947	0.0317
	1.69334	0.89602	0.02953	0.03173
	1.69854	0.89644	0.0296	0.03176
	1.70377	0.89686	0.02966	0.0318
	1.70901	0.89728	0.02973	0.03183
	1.71427	0.89771	0.02979	0.03187
	1.71954	0.89813	0.02985	0.0319
	1.72483	0.89854	0.02992	0.03193
	1.73013	0.89896	0.02998	0.03197
	1.73545	0.89938	0.03005	0.032
	1.74079	0.8998	0.03011	0.03204
	1.74615	0.90021	0.03018	0.03207
	1.75152	0.90063	0.03024	0.0321
	1.7569	0.90104	0.03031	0.03214
	1.76231	0.90145	0.03037	0.03217
	1.76773	0.90187	0.03044	0.0322
	1.77317	0.90228	0.0305	0.03224
	1.77862	0.90269	0.03057	0.03227
	1.78409	0.9031	0.03063	0.03231
	1.78958	0.9035	0.0307	0.03234
	1.79508	0.90391	0.03077	0.03237
	1.80061	0.90432	0.03083	0.03241
	1.80614	0.90472	0.0309	0.03244
	1.8117	0.90513	0.03096	0.03247
	1.81727	0.90553	0.03103	0.03251
	1.82286	0.90594	0.03109	0.03254
	1.82847	0.90634	0.03116	0.03257
	1.83409	0.90674	0.03123	0.03261
	1.83973	0.90714	0.03129	0.03264
	1.84539	0.90754	0.03136	0.03267
	1.85107	0.90794	0.03142	0.03271
	1.85676	0.90834	0.03149	0.03274
	1.86247	0.90873	0.03156	0.03277
	1.8682	0.90913	0.03162	0.03281
	1.87395	0.90953	0.03169	0.03284
	1.87971	0.90992	0.03176	0.03287
	1.88549	0.91031	0.03182	0.0329
	1.89129	0.91071	0.03189	0.03294
	1.89711	0.9111	0.03196	0.03297
	1.90295	0.91149	0.03203	0.033
	1.9088	0.91188	0.03209	0.03304
	1.91467	0.91227	0.03216	0.03307
	1.92056	0.91266	0.03223	0.0331
	1.92647	0.91304	0.03229	0.03313
	1.93239	0.91343	0.03236	0.03317
	1.93834	0.91382	0.03243	0.0332
	1.9443	0.9142	0.0325	0.03323
	1.95028	0.91458	0.03256	0.03327
	1.95628	0.91497	0.03263	0.0333
	1.96229	0.91535	0.0327	0.03333
	1.96833	0.91573	0.03277	0.03336
	1.97438	0.91611	0.03284	0.0334
	1.98046	0.91649	0.0329	0.03343
	1.98655	0.91687	0.03297	0.03346
	1.99266	0.91725	0.03304	0.03349
	1.99879	0.91763	0.03311	0.03352
	2.00494	0.918	0.03318	0.03356
	2.0111	0.91838	0.03324	0.03359
	2.01729	0.91875	0.03331	0.03362
	2.02349	0.91913	0.03338	0.03365
	2.02972	0.9195	0.03345	0.03369
	2.03596	0.91987	0.03352	0.03372
	2.04222	0.92024	0.03359	0.03375
	2.04851	0.92061	0.03366	0.03378
	2.05481	0.92098	0.03372	0.03381
	2.06113	0.92135	0.03379	0.03385
	2.06747	0.92172	0.03386	0.03388
	2.07383	0.92219	0.03393	0.03391
	2.0802	0.92273	0.034	0.03394
	2.0866	0.92326	0.03407	0.03397
	2.09302	0.9238	0.03414	0.034
	2.09946	0.92433	0.03421	0.03404
	2.10592	0.92487	0.03428	0.03407
	2.11239	0.9254	0.03435	0.0341
	2.11889	0.92593	0.03442	0.03413
	2.12541	0.92646	0.03449	0.03416
	2.13195	0.92699	0.03456	0.03419
	2.1385	0.92752	0.03463	0.03423
	2.14508	0.92805	0.03469	0.03426
	2.15168	0.92858	0.03476	0.03429
	2.1583	0.9291	0.03483	0.03432
	2.16494	0.92963	0.0349	0.03435
	2.1716	0.93015	0.03497	0.03438
	2.17827	0.93067	0.03504	0.03441
	2.18498	0.93119	0.03511	0.03444
	2.1917	0.93172	0.03519	0.03448
	2.19844	0.93223	0.03526	0.03451
	2.2052	0.93275	0.03533	0.03454
	2.21198	0.93327	0.0354	0.03457
	2.21879	0.93379	0.03547	0.0346
	2.22561	0.9343	0.03554	0.03463
	2.23246	0.93482	0.03561	0.03466
	2.23932	0.93533	0.03568	0.03469
	2.24621	0.93584	0.03575	0.03472
	2.25312	0.93636	0.03582	0.03475
	2.26005	0.93687	0.03589	0.03479
	2.267	0.93737	0.03596	0.03482
	2.27397	0.93788	0.03603	0.03485
	2.28097	0.93839	0.0361	0.03488
	2.28798	0.9389	0.03618	0.03491
	2.29502	0.9394	0.03625	0.03494
	2.30208	0.93991	0.03632	0.03497
	2.30916	0.94041	0.03639	0.035
	2.31627	0.94091	0.03646	0.03503
	2.32339	0.94141	0.03653	0.03506
	2.33054	0.94191	0.0366	0.03509
	2.3377	0.94241	0.03667	0.03512
	2.34489	0.94291	0.03675	0.03515
	2.35211	0.94341	0.03682	0.03518
	2.35934	0.94391	0.03689	0.03521
	2.3666	0.9444	0.03696	0.03524
	2.37388	0.9449	0.03703	0.03527
	2.38118	0.94539	0.03711	0.0353
	2.3885	0.94588	0.03718	0.03533
	2.39585	0.94637	0.03725	0.03536
	2.40322	0.94686	0.03732	0.03539
	2.41061	0.94735	0.03739	0.03542
	2.41803	0.94784	0.03747	0.03545
	2.42546	0.94833	0.03754	0.03548
	2.43292	0.94881	0.03761	0.03551
	2.44041	0.9493	0.03768	0.03554
	2.44791	0.94978	0.03775	0.03557
	2.45544	0.95027	0.03783	0.0356
	2.463	0.95075	0.0379	0.03563
	2.47057	0.95123	0.03797	0.03566
	2.47817	0.95171	0.03805	0.03569
	2.48579	0.95219	0.03812	0.03572
	2.49344	0.95267	0.03819	0.03575
	2.50111	0.95315	0.03826	0.03578
	2.5088	0.95362	0.03834	0.03581
	2.51652	0.9541	0.03841	0.03584
	2.52426	0.95457	0.03848	0.03587
	2.53202	0.95505	0.03855	0.03589
	2.53981	0.95552	0.03863	0.03592
	2.54762	0.95599	0.0387	0.03595
	2.55546	0.95646	0.03877	0.03598
	2.56332	0.95693	0.03885	0.03601
	2.57121	0.9574	0.03892	0.03604
	2.57911	0.95787	0.03899	0.03607
	2.58705	0.95833	0.03907	0.0361
	2.595	0.9588	0.03914	0.03613
	2.60299	0.95926	0.03921	0.03616
	2.61099	0.95973	0.03929	0.03618
	2.61902	0.96019	0.03936	0.03621
	2.62708	0.96065	0.03944	0.03624
	2.63516	0.96111	0.03951	0.03627
	2.64327	0.96157	0.03958	0.0363
	2.6514	0.96203	0.03966	0.03633
	2.65955	0.96249	0.03973	0.03636
	2.66773	0.96295	0.0398	0.03639
	2.67594	0.9634	0.03988	0.03641
	2.68417	0.96386	0.03995	0.03644
	2.69242	0.96431	0.04003	0.03647
	2.70071	0.96476	0.0401	0.0365
	2.70901	0.96522	0.04017	0.03653
	2.71734	0.96567	0.04025	0.03656
	2.7257	0.96612	0.04032	0.03658
	2.73409	0.96657	0.0404	0.03661
	2.7425	0.96702	0.04047	0.03664
	2.75093	0.96746	0.04054	0.03667
	2.75939	0.96791	0.04062	0.0367
	2.76788	0.96835	0.04069	0.03672
	2.77639	0.9688	0.04077	0.03675
	2.78493	0.96924	0.04084	0.03678
	2.7935	0.96968	0.04092	0.03681
	2.80209	0.97013	0.04099	0.03684
	2.81071	0.97057	0.04107	0.03686
	2.81936	0.97101	0.04114	0.03689
	2.82803	0.97144	0.04122	0.03692
	2.83673	0.97188	0.04129	0.03695
	2.84545	0.97232	0.04137	0.03697
	2.8542	0.97275	0.04144	0.037
	2.86298	0.97319	0.04151	0.03703
	2.87179	0.97362	0.04159	0.03706
	2.88062	0.97406	0.04166	0.03708
	2.88948	0.97449	0.04174	0.03711
	2.89837	0.97492	0.04181	0.03714
	2.90729	0.97535	0.04189	0.03717
	2.91623	0.97578	0.04196	0.03719
	2.9252	0.97621	0.04204	0.03722
	2.9342	0.97663	0.04212	0.03725
	2.94322	0.97706	0.04219	0.03727
	2.95227	0.97749	0.04227	0.0373
	2.96136	0.97791	0.04234	0.03733
	2.97046	0.97833	0.04242	0.03736
	2.9796	0.97876	0.04249	0.03738
	2.98877	0.97918	0.04257	0.03741
	2.99796	0.9796	0.04264	0.03744
	3.00718	0.98002	0.04272	0.03746
	3.01643	0.98044	0.04279	0.03749
	3.02571	0.98086	0.04287	0.03752
	3.03501	0.98127	0.04294	0.03754
	3.04435	0.98169	0.04302	0.03757
	3.05371	0.9821	0.0431	0.0376
	3.06311	0.98252	0.04317	0.03762
	3.07253	0.98293	0.04325	0.03765
	3.08198	0.98334	0.04332	0.03768
	3.09146	0.98376	0.0434	0.0377
	3.10097	0.98417	0.04347	0.03773
	3.11051	0.98458	0.04355	0.03776
	3.12007	0.98499	0.04363	0.03778
	3.12967	0.98539	0.0437	0.03781
	3.1393	0.9858	0.04378	0.03783
	3.14895	0.98621	0.04385	0.03786
	3.15864	0.98661	0.04393	0.03789
	3.16835	0.98702	0.04401	0.03791
	3.1781	0.98742	0.04408	0.03794
	3.18787	0.98782	0.04416	0.03796
	3.19768	0.98822	0.04423	0.03799
	3.20752	0.98862	0.04431	0.03802
	3.21738	0.98902	0.04439	0.03804
	3.22728	0.98942	0.04446	0.03807
	3.2372	0.98982	0.04454	0.03809
	3.24716	0.99022	0.04462	0.03812
	3.25715	0.99061	0.04469	0.03815
	3.26717	0.99101	0.04477	0.03817
	3.27722	0.9914	0.04484	0.0382
	3.2873	0.9918	0.04492	0.03822
	3.29741	0.99219	0.045	0.03825
	3.30755	0.99258	0.04507	0.03827
	3.31772	0.99297	0.04515	0.0383
	3.32793	0.99336	0.04523	0.03832
	3.33817	0.99375	0.0453	0.03835
	3.34843	0.99414	0.04538	0.03837
	3.35873	0.99452	0.04546	0.0384
	3.36906	0.99491	0.04553	0.03842
	3.37943	0.9953	0.04561	0.03845
	3.38982	0.99568	0.04569	0.03848
	3.40025	0.99606	0.04576	0.0385
	3.41071	0.99645	0.04584	0.03853
	3.4212	0.99683	0.04592	0.03855
	3.43172	0.99721	0.04599	0.03857
	3.44228	0.99759	0.04607	0.0386
	3.45286	0.99797	0.04615	0.03862
	3.46348	0.99835	0.04622	0.03865
	3.47414	0.99872	0.0463	0.03867
	3.48482	0.9991	0.04638	0.0387
	3.49554	0.99948	0.04645	0.03872
	3.50629	0.99985	0.04653	0.03875
	3.51708	1.00022	0.04661	0.03877
	3.5279	1.0006	0.04668	0.0388
	3.53875	1.00097	0.04676	0.03882
	3.54963	1.00134	0.04684	0.03885
	3.56055	1.00171	0.04691	0.03887
	3.5715	1.00208	0.04699	0.03889
	3.58249	1.00245	0.04707	0.03892
	3.59351	1.00282	0.04714	0.03894
	3.60456	1.00319	0.04722	0.03897
	3.61565	1.00355	0.0473	0.03899
	3.62677	1.00392	0.04737	0.03902
	3.63792	1.00428	0.04745	0.03904
	3.64911	1.00464	0.04753	0.03906
	3.66034	1.00501	0.04761	0.03909
	3.6716	1.00537	0.04768	0.03911
	3.68289	1.00573	0.04776	0.03914
	3.69422	1.00609	0.04784	0.03916
	3.70558	1.00645	0.04791	0.03918
	3.71698	1.00681	0.04799	0.03921
	3.72841	1.00717	0.04807	0.03923
	3.73988	1.00752	0.04815	0.03925
	3.75138	1.00788	0.04822	0.03928
	3.76292	1.00823	0.0483	0.0393
	3.7745	1.00859	0.04838	0.03933
	3.78611	1.00894	0.04845	0.03935
	3.79775	1.00929	0.04853	0.03937
	3.80943	1.00965	0.04861	0.0394
	3.82115	1.01	0.04869	0.03942
	3.8329	1.01035	0.04876	0.03944
	3.84469	1.0107	0.04884	0.03947
	3.85652	1.01105	0.04892	0.03949
	3.86838	1.01139	0.04899	0.03951
	3.88028	1.01174	0.04907	0.03954
	3.89221	1.01209	0.04915	0.03956
	3.90419	1.01243	0.04923	0.03958
	3.91619	1.01277	0.0493	0.0396
	3.92824	1.01312	0.04938	0.03963
	3.94032	1.01346	0.04946	0.03965
	3.95244	1.0138	0.04953	0.03967
	3.9646	1.01414	0.04961	0.0397
	3.97679	1.01448	0.04969	0.03972
	3.98903	1.01482	0.04977	0.03974
	4.0013	1.01516	0.04984	0.03976
	4.0136	1.0155	0.04992	0.03979
	4.02595	1.01584	0.05	0.03981
	4.03833	1.01617	0.05008	0.03983
	4.05075	1.01651	0.05015	0.03985
	4.06321	1.01684	0.05023	0.03988
	4.07571	1.01718	0.05031	0.0399
	4.08825	1.01751	0.05038	0.03992
	4.10082	1.01784	0.05046	0.03994
	4.11344	1.01817	0.05054	0.03997
	4.12609	1.0185	0.05062	0.03999
	4.13878	1.01883	0.05069	0.04001
	4.15151	1.01916	0.05077	0.04003
	4.16428	1.01949	0.05085	0.04006
	4.17709	1.01982	0.05092	0.04008
	4.18994	1.02014	0.051	0.0401
	4.20282	1.02047	0.05108	0.04012
	4.21575	1.0208	0.05116	0.04014
	4.22872	1.02112	0.05123	0.04017
	4.24173	1.02144	0.05131	0.04019
	4.25477	1.02177	0.05139	0.04021
	4.26786	1.02209	0.05147	0.04023
	4.28099	1.02241	0.05154	0.04025
	4.29415	1.02273	0.05162	0.04027
	4.30736	1.02305	0.0517	0.0403
	4.32061	1.02337	0.05177	0.04032
	4.3339	1.02368	0.05185	0.04034
	4.34723	1.024	0.05193	0.04036
	4.3606	1.02432	0.05201	0.04038
	4.37402	1.02463	0.05208	0.0404
	4.38747	1.02495	0.05216	0.04043
	4.40096	1.02526	0.05224	0.04045
	4.4145	1.02558	0.05231	0.04047
	4.42808	1.02589	0.05239	0.04049
	4.4417	1.0262	0.05247	0.04051
	4.45536	1.02651	0.05255	0.04053
	4.46907	1.02682	0.05262	0.04055
	4.48281	1.02713	0.0527	0.04057
	4.4966	1.02744	0.05278	0.0406
	4.51043	1.02775	0.05285	0.04062
	4.5243	1.02805	0.05293	0.04064
	4.53822	1.02836	0.05301	0.04066
	4.55218	1.02867	0.05308	0.04068
	4.56618	1.02897	0.05316	0.0407
	4.58023	1.02927	0.05324	0.04072
	4.59431	1.02958	0.05332	0.04074
[truncated: 1,003 more rows]

## Sheet: Fig. 2A
	Theoretical results			Experimental data*
				G6P			Glucose			Mannitol			Lactose
	Obtained from analytical results combining Eqs. S57 and S160			Reference: Nature 528, 99-104 (2015)
	Growth rate (1/h)	ϕZ (%)	Jacetate (mM /OD600/h)	Growth rate (1/h)	ϕZ (%)	Jacetate (mM /OD600/h)	Growth rate (1/h)	ϕZ (%)	Jacetate (mM /OD600/h)	Growth rate (1/h)	ϕZ (%)	Jacetate (mM /OD600/h)	Growth rate (1/h)	ϕZ (%)	Jacetate (mM /OD600/h)
	0	0	0	1.03	3.45	2.77	0.89	2.84	1.54	0.85	3.11	0.82	0.8	3.91	0.67
	0	0.16054	0	0.99	5.7	2.91	0.9	3.85	1.56	0.81	5.56	0.86	0.75	5.86	0.7
	0	0.32107	0	0.94	7.16	2.84	0.85	5.3	1.49	0.76	8.18	0.75	0.67	8.21	0.69
	0	0.48161	0	0.88	10.39	2.9	0.81	7.53	1.3	0.7	9.1	0.58	0.6	12.35	0.49
	0	0.64214	0	0.78	11.96	2.38	0.8	8.52	1	0.64	11.12	0.59	0.53	18.66	0.51
	0	0.80268	0	0.84	13.78	2.53	0.72	10	1.25	0.6	12.84	0.5	0.48	18.9	0.37
	0	0.96321	0				0.72	10.84	1.06
	0	1.12375	0				0.69	12.51	1.38
	0	1.28428	0				0.66	13.42	1.02
	0	1.44482	0				0.62	16.62	0.95
	0	1.60535	0				0.44	23.18	0.91
	0	1.76589	0
	0	1.92642	0
	0	2.08696	0
	0	2.24749	0
	0	2.40803	0			* Engauge Digitizer 11.1 was used to extract the experimental data from the plots of the reference study.
	0	2.56856	0
	0	2.7291	0
	0	2.88963	0
	0	3.05017	0
	0	3.2107	0
	0	3.37124	0
	0	3.53177	0
	0	3.69231	0
	0	3.85284	0
	0	4.01338	0
	0	4.17391	0
	0	4.33445	0
	0	4.49498	0
	0	4.65552	0
	0	4.81605	0
	0	4.97659	0
	0	5.13712	0
	0	5.29766	0
	0	5.45819	0
	0	5.61873	0
	0	5.77926	0
	0	5.9398	0
	0	6.10033	0
	0	6.26087	0
	0	6.4214	0
	0	6.58194	0
	0	6.74247	0
	0	6.90301	0
	0	7.06355	0
	0	7.22408	0
	0	7.38462	0
	0	7.54515	0
	0	7.70569	0
	0	7.86622	0
	0	8.02676	0
	0	8.18729	0
	0	8.34783	0
	0	8.50836	0
	0	8.6689	0
	0	8.82943	0
	0	8.98997	0
	0	9.1505	0
	0	9.31104	0
	0	9.47157	0
	0	9.63211	0
	0	9.79264	0
	0	9.95318	0
	0	10.1137	0
	0	10.2743	0
	0	10.4348	0
	0	10.5953	0
	0	10.7559	0
	0	10.9164	0
	0	11.0769	0
	0	11.2375	0
	0	11.398	0
	0	11.5585	0
	0	11.7191	0
	0	11.8796	0
	0	12.0401	0
	0	12.2007	0
	0	12.3612	0
	0	12.5217	0
	0	12.6823	0
	0	12.8428	0
	0	13.0033	0
	0	13.1639	0
	0	13.3244	0
	0	13.4849	0
	0	13.6455	0
	0	13.806	0
	0	13.9666	0
	0	14.1271	0
	0	14.2876	0
	0	14.4482	0
	0	14.6087	0
	0	14.7692	0
	0	14.9298	0
	0	15.0903	0
	0	15.2508	0
	0	15.4114	0
	0	15.5719	0
	0	15.7324	0
	0	15.893	0
	0	16.0535	0
	0	16.2141	0
	0	16.3746	0
	0	16.5351	0
	0	16.6957	0
	0	16.8562	0
	0	17.0167	0
	0	17.1773	0
	0	17.3378	0
	0	17.4983	0
	0	17.6589	0
	0	17.8194	0
	0	17.9799	0
	0	18.1405	0
	0	18.301	0
	0	18.4615	0
	0	18.6221	0
	0	18.7826	0
	0	18.9431	0
	0	19.1037	0
	0	19.2642	0
	0	19.4247	0
	0	19.5853	0
	0	19.7458	0
	0	19.9063	0
	0	20.0669	0
	0	20.2274	0
	0	20.388	0
	0	20.5485	0
	0	20.709	0
	0	20.8696	0
	0	21.0301	0
	0	21.1906	0
	0	21.3512	0
	0	21.5117	0
	0	21.6722	0
	0	21.8328	0
	0	21.9933	0
	0	22.1538	0
	0	22.3144	0
	0	22.4749	0
	0	22.6354	0
	0	22.796	0
	0	22.9565	0
	0	23.1171	0
	0	23.2776	0
	0	23.4381	0
	0	23.5987	0
	0	23.7592	0
	0	23.9197	0
	0	24.0803	0
	0	24.2408	0
	0	24.4013	0
	0	24.5619	0
	0	24.7224	0
	0	24.8829	0
	0	25.0435	0
	0	25.204	0
	0	25.3646	0
	0	25.5251	0
	0	25.6856	0
	0	25.8462	0
	0	26.0067	0
	0	26.1672	0
	0	26.3278	0
	0	26.4883	0
	0	26.6488	0
	0	26.8094	0
	0	26.9699	0
	0	27.1304	0
	0	27.291	0
	0	27.4515	0
	0	27.612	0
	0	27.7726	0
	0	27.9331	0
	0	28.0937	0
	0	28.2542	0
	0	28.4147	0
	0	28.5753	0
	0	28.7358	0
	0	28.8963	0
	0	29.0569	0
	0	29.2174	0
	0	29.3779	0
	0	29.5385	0
	0	29.699	0
	0	29.8595	0
	0	30.0201	0
	0	30.1806	0
	0	30.3411	0
	0	30.5017	0
	0	30.6622	0
	0	30.8227	0
	0	30.9833	0
	0	31.1438	0
	0	31.3043	0
	0	31.4649	0
	0	31.6254	0
	0	31.7859	0
	0	31.9465	0
	0	32.107	0
	0	32.2676	0
	0	32.4281	0
	0	32.5886	0
	0	32.7492	0
	0	32.9097	0
	0	33.0702	0
	0	33.2308	0
	0	33.3913	0
	0	33.5518	0
	0	33.7124	0
	0	33.8729	0
	0	34.0334	0
	0	34.194	0
	0	34.3545	0
	0	34.5151	0
	0	34.6756	0
	0	34.8361	0
	0	34.9967	0
	0	35.1572	0
	0	35.3177	0
	0	35.4783	0
	0	35.6388	0
	0	35.7993	0
	0	35.9599	0
	0	36.1204	0
	0	36.2809	0
	0	36.4415	0
	0	36.602	0
	0	36.7625	0
	0	36.9231	0
	0	37.0836	0
	0	37.2441	0
	0	37.4047	0
	0	37.5652	0
	0	37.7257	0
	0	37.8863	0
	0	38.0468	0
	0	38.2074	0
	0	38.3679	0
	0	38.5284	0
	0	38.689	0
	0	38.8495	0
	0	39.01	0
	0	39.1706	0
	0	39.3311	0
	0	39.4916	0
	0	39.6522	0
	0	39.8127	0
	0	39.9732	0
	0	40.1338	0
	0	40.2943	0
	0	40.4549	0
	0	40.6154	0
	0	40.7759	0
	0	40.9365	0
	0	41.097	0
	0	41.2575	0
	0	41.4181	0
	0	41.5786	0
	0	41.7391	0
	0	41.8997	0
	0	42.0602	0
	0	42.2207	0
	0	42.3813	0
	0	42.5418	0
	0	42.7023	0
	0	42.8629	0
	0	43.0234	0
	0	43.184	0
	0	43.3445	0
	0	43.505	0
	0	43.6656	0
	0	43.8261	0
	0	43.9866	0
	0	44.1472	0
	0	44.3077	0
	0	44.4682	0
	0	44.6288	0
	0	44.7893	0
	0	44.9498	0
	0	45.1104	0
	0	45.2709	0
	0	45.4314	0
	0	45.592	0
	0	45.7525	0
	0	45.913	0
	0	46.0736	0
	0	46.2341	0
	0	46.3946	0
	0	46.5552	0
	0	46.7157	0
	0	46.8762	0
	0	47.0368	0
	0	47.1973	0
	0	47.3579	0
	0	47.5184	0
	0	47.6789	0
	0	47.8395	0
	0	48	0
	0.00435	0	8.6887e-19
	0.00433	0.16054	8.65964e-19
	0.00432	0.32107	8.63058e-19
	0.0043	0.48161	8.60152e-19
	0.00429	0.64214	8.57247e-19
	0.00428	0.80268	8.54341e-19
	0.00426	0.96321	8.51435e-19
	0.00425	1.12375	8.48529e-19
	0.00423	1.28428	8.45623e-19
	0.00422	1.44482	8.42717e-19
	0.0042	1.60535	8.39811e-19
	0.00419	1.76589	8.36905e-19
	0.00417	1.92642	8.33999e-19
	0.00416	2.08696	8.31093e-19
	0.00414	2.24749	8.28187e-19
	0.00413	2.40803	8.25281e-19
	0.00412	2.56856	8.22375e-19
	0.0041	2.7291	8.1947e-19
	0.00409	2.88963	8.16564e-19
	0.00407	3.05017	8.13658e-19
	0.00406	3.2107	8.10752e-19
	0.00404	3.37124	8.07846e-19
	0.00403	3.53177	8.0494e-19
	0.00401	3.69231	8.02034e-19
	0.004	3.85284	7.99128e-19
	0.00398	4.01338	7.96222e-19
	0.00397	4.17391	7.93316e-19
	0.00396	4.33445	7.9041e-19
	0.00394	4.49498	7.87504e-19
	0.00393	4.65552	7.84599e-19
	0.00391	4.81605	7.81693e-19
	0.0039	4.97659	7.78787e-19
	0.00388	5.13712	7.75881e-19
	0.00387	5.29766	7.72975e-19
	0.00385	5.45819	7.70069e-19
	0.00384	5.61873	7.67163e-19
	0.00382	5.77926	7.64257e-19
	0.00381	5.9398	7.61351e-19
	0.0038	6.10033	7.58445e-19
	0.00378	6.26087	7.55539e-19
	0.00377	6.4214	7.52633e-19
	0.00375	6.58194	7.49727e-19
	0.00374	6.74247	7.46822e-19
	0.00372	6.90301	7.43916e-19
	0.00371	7.06355	7.4101e-19
	0.00369	7.22408	7.38104e-19
	0.00368	7.38462	7.35198e-19
	0.00366	7.54515	7.32292e-19
	0.00365	7.70569	7.29386e-19
	0.00364	7.86622	7.2648e-19
	0.00362	8.02676	7.23574e-19
	0.00361	8.18729	7.20668e-19
	0.00359	8.34783	7.17762e-19
	0.00358	8.50836	7.14856e-19
	0.00356	8.6689	7.1195e-19
	0.00355	8.82943	7.09045e-19
	0.00353	8.98997	7.06139e-19
	0.00352	9.1505	7.03233e-19
	0.0035	9.31104	7.00327e-19
	0.00349	9.47157	6.97421e-19
	0.00348	9.63211	6.94515e-19
	0.00346	9.79264	6.91609e-19
	0.00345	9.95318	6.88703e-19
	0.00343	10.1137	6.85797e-19
	0.00342	10.2743	6.82891e-19
	0.0034	10.4348	6.79985e-19
	0.00339	10.5953	6.77079e-19
	0.00337	10.7559	6.74174e-19
	0.00336	10.9164	6.71268e-19
	0.00334	11.0769	6.68362e-19
	0.00333	11.2375	6.65456e-19
	0.00332	11.398	6.6255e-19
	0.0033	11.5585	6.59644e-19
	0.00329	11.7191	6.56738e-19
	0.00327	11.8796	6.53832e-19
	0.00326	12.0401	6.50926e-19
	0.00324	12.2007	6.4802e-19
	0.00323	12.3612	6.45114e-19
	0.00321	12.5217	6.42208e-19
	0.0032	12.6823	6.39302e-19
	0.00318	12.8428	6.36397e-19
	0.00317	13.0033	6.33491e-19
	0.00316	13.1639	6.30585e-19
	0.00314	13.3244	6.27679e-19
	0.00313	13.4849	6.24773e-19
	0.00311	13.6455	6.21867e-19
	0.0031	13.806	6.18961e-19
	0.00308	13.9666	6.16055e-19
	0.00307	14.1271	6.13149e-19
	0.00305	14.2876	6.10243e-19
	0.00304	14.4482	6.07337e-19
	0.00302	14.6087	6.04431e-19
	0.00301	14.7692	6.01526e-19
	0.003	14.9298	5.9862e-19
	0.00298	15.0903	5.95714e-19
	0.00297	15.2508	5.92808e-19
	0.00295	15.4114	5.89902e-19
	0.00294	15.5719	5.86996e-19
	0.00292	15.7324	5.8409e-19
	0.00291	15.893	5.81184e-19
	0.00289	16.0535	5.78278e-19
	0.00288	16.2141	5.75372e-19
	0.00286	16.3746	5.72466e-19
	0.00285	16.5351	5.6956e-19
	0.00284	16.6957	5.66654e-19
	0.00282	16.8562	5.63749e-19
	0.00281	17.0167	5.60843e-19
	0.00279	17.1773	5.57937e-19
	0.00278	17.3378	5.55031e-19
	0.00276	17.4983	5.52125e-19
	0.00275	17.6589	5.49219e-19
	0.00273	17.8194	5.46313e-19
	0.00272	17.9799	5.43407e-19
	0.0027	18.1405	5.40501e-19
	0.00269	18.301	5.37595e-19
	0.00268	18.4615	5.34689e-19
	0.00266	18.6221	5.31783e-19
	0.00265	18.7826	5.28878e-19
	0.00263	18.9431	5.25972e-19
	0.00262	19.1037	5.23066e-19
	0.0026	19.2642	5.2016e-19
	0.00259	19.4247	5.17254e-19
	0.00257	19.5853	5.14348e-19
	0.00256	19.7458	5.11442e-19
	0.00254	19.9063	5.08536e-19
	0.00253	20.0669	5.0563e-19
	0.00252	20.2274	5.02724e-19
	0.0025	20.388	4.99818e-19
	0.00249	20.5485	4.96912e-19
	0.00247	20.709	4.94006e-19
	0.00246	20.8696	4.91101e-19
	0.00244	21.0301	4.88195e-19
	0.00243	21.1906	4.85289e-19
	0.00241	21.3512	4.82383e-19
	0.0024	21.5117	4.79477e-19
	0.00238	21.6722	4.76571e-19
	0.00237	21.8328	4.73665e-19
	0.00236	21.9933	4.70759e-19
	0.00234	22.1538	4.67853e-19
	0.00233	22.3144	4.64947e-19
	0.00231	22.4749	4.62041e-19
	0.0023	22.6354	4.59135e-19
	0.00228	22.796	4.5623e-19
	0.00227	22.9565	4.53324e-19
	0.00225	23.1171	4.50418e-19
	0.00224	23.2776	4.47512e-19
	0.00222	23.4381	4.44606e-19
	0.00221	23.5987	4.417e-19
	0.0022	23.7592	4.38794e-19
	0.00218	23.9197	4.35888e-19
	0.00217	24.0803	4.32982e-19
	0.00215	24.2408	4.30076e-19
	0.00214	24.4013	4.2717e-19
	0.00212	24.5619	4.24264e-19
	0.00211	24.7224	4.21358e-19
	0.00209	24.8829	4.18453e-19
	0.00208	25.0435	4.15547e-19
	0.00206	25.204	4.12641e-19
	0.00205	25.3646	4.09735e-19
	0.00204	25.5251	4.06829e-19
	0.00202	25.6856	4.03923e-19
	0.00201	25.8462	4.01017e-19
	0.00199	26.0067	3.98111e-19
	0.00198	26.1672	3.95205e-19
	0.00196	26.3278	3.92299e-19
	0.00195	26.4883	3.89393e-19
	0.00193	26.6488	3.86487e-19
	0.00192	26.8094	3.83581e-19
	0.0019	26.9699	3.80676e-19
	0.00189	27.1304	3.7777e-19
	0.00188	27.291	3.74864e-19
	0.00186	27.4515	3.71958e-19
	0.00185	27.612	3.69052e-19
	0.00183	27.7726	3.66146e-19
	0.00182	27.9331	3.6324e-19
	0.0018	28.0937	3.60334e-19
	0.00179	28.2542	3.57428e-19
	0.00177	28.4147	3.54522e-19
	0.00176	28.5753	3.51616e-19
	0.00174	28.7358	3.4871e-19
	0.00173	28.8963	3.45805e-19
	0.00172	29.0569	3.42899e-19
	0.0017	29.2174	3.39993e-19
	0.00169	29.3779	3.37087e-19
	0.00167	29.5385	3.34181e-19
	0.00166	29.699	3.31275e-19
	0.00164	29.8595	3.28369e-19
	0.00163	30.0201	3.25463e-19
	0.00161	30.1806	3.22557e-19
	0.0016	30.3411	3.19651e-19
	0.00158	30.5017	3.16745e-19
	0.00157	30.6622	3.13839e-19
	0.00156	30.8227	3.10933e-19
	0.00154	30.9833	3.08028e-19
	0.00153	31.1438	3.05122e-19
	0.00151	31.3043	3.02216e-19
	0.0015	31.4649	2.9931e-19
	0.00148	31.6254	2.96404e-19
	0.00147	31.7859	2.93498e-19
	0.00145	31.9465	2.90592e-19
	0.00144	32.107	2.87686e-19
	0.00143	32.2676	2.8478e-19
	0.00141	32.4281	2.81874e-19
	0.0014	32.5886	2.78968e-19
	0.00138	32.7492	2.76062e-19
	0.00137	32.9097	2.73157e-19
	0.00135	33.0702	2.70251e-19
	0.00134	33.2308	2.67345e-19
	0.00132	33.3913	2.64439e-19
	0.00131	33.5518	2.61533e-19
	0.00129	33.7124	2.58627e-19
	0.00128	33.8729	2.55721e-19
	0.00127	34.0334	2.52815e-19
	0.00125	34.194	2.49909e-19
	0.00124	34.3545	2.47003e-19
	0.00122	34.5151	2.44097e-19
	0.00121	34.6756	2.41191e-19
	0.00119	34.8361	2.38285e-19
	0.00118	34.9967	2.3538e-19
	0.00116	35.1572	2.32474e-19
	0.00115	35.3177	2.29568e-19
	0.00113	35.4783	2.26662e-19
	0.00112	35.6388	2.23756e-19
	0.00111	35.7993	2.2085e-19
	0.00109	35.9599	2.17944e-19
	0.00108	36.1204	2.15038e-19
	0.00106	36.2809	2.12132e-19
	0.00105	36.4415	2.09226e-19
	0.00103	36.602	2.0632e-19
	0.00102	36.7625	2.03414e-19
	0.001	36.9231	2.00509e-19
	0.000988803	37.0836	1.97603e-19
	0.000974262	37.2441	1.94697e-19
	0.000959721	37.4047	1.91791e-19
	0.00094518	37.5652	1.88885e-19
	0.000930638	37.7257	1.85979e-19
	0.000916097	37.8863	1.83073e-19
	0.000901556	38.0468	1.80167e-19
	0.000887015	38.2074	1.77261e-19
	0.000872473	38.3679	1.74355e-19
	0.000857932	38.5284	1.71449e-19
	0.000843391	38.689	1.68543e-19
	0.00082885	38.8495	1.65637e-19
	0.000814309	39.01	1.62732e-19
	0.000799767	39.1706	1.59826e-19
	0.000785226	39.3311	1.5692e-19
	0.000770685	39.4916	1.54014e-19
	0.000756144	39.6522	1.51108e-19
	0.000741602	39.8127	1.48202e-19
	0.000727061	39.9732	1.45296e-19
	0.00071252	40.1338	1.4239e-19
	0.000697979	40.2943	1.39484e-19
	0.000683438	40.4549	1.36578e-19
	0.000668896	40.6154	1.33672e-19
	0.000654355	40.7759	1.30766e-19
	0.000639814	40.9365	1.2786e-19
	0.000625273	41.097	1.24955e-19
	0.000610731	41.2575	1.22049e-19
	0.00059619	41.4181	1.19143e-19
	0.000581649	41.5786	1.16237e-19
	0.000567108	41.7391	1.13331e-19
	0.000552567	41.8997	1.10425e-19
	0.000538025	42.0602	1.07519e-19
	0.000523484	42.2207	1.04613e-19
	0.000508943	42.3813	1.01707e-19
	0.000494402	42.5418	9.88013e-20
	0.00047986	42.7023	9.58954e-20
	0.000465319	42.8629	9.29895e-20
	0.000450778	43.0234	9.00835e-20
	0.000436237	43.184	8.71776e-20
	0.000421696	43.3445	8.42717e-20
	0.000407154	43.505	8.13658e-20
	0.000392613	43.6656	7.84599e-20
	0.000378072	43.8261	7.55539e-20
	0.000363531	43.9866	7.2648e-20
	0.000348989	44.1472	6.97421e-20
	0.000334448	44.3077	6.68362e-20
	0.000319907	44.4682	6.39303e-20
	0.000305366	44.6288	6.10243e-20
	0.000290824	44.7893	5.81184e-20
	0.000276283	44.9498	5.52125e-20
	0.000261742	45.1104	5.23066e-20
	0.000247201	45.2709	4.94006e-20
	0.00023266	45.4314	4.64947e-20
	0.000218118	45.592	4.35888e-20
	0.000203577	45.7525	4.06829e-20
	0.000189036	45.913	3.7777e-20
	0.000174495	46.0736	3.4871e-20
	0.000159953	46.2341	3.19651e-20
	0.000145412	46.3946	2.90592e-20
	0.000130871	46.5552	2.61533e-20
	0.00011633	46.7157	2.32474e-20
	0.000101789	46.8762	2.03414e-20
	8.72474e-05	47.0368	1.74355e-20
	7.27061e-05	47.1973	1.45296e-20
	5.81649e-05	47.3579	1.16237e-20
	4.36237e-05	47.5184	8.71776e-21
	2.90825e-05	47.6789	5.81184e-21
	1.45412e-05	47.8395	2.90592e-21
	9.05797e-12	48	1.81015e-27
	0.0087	0	1.73774e-18
	0.00867	0.16054	1.73193e-18
	0.00864	0.32107	1.72612e-18
	0.00861	0.48161	1.7203e-18
	0.00858	0.64214	1.71449e-18
	0.00855	0.80268	1.70868e-18
	0.00852	0.96321	1.70287e-18
	0.00849	1.12375	1.69706e-18
	0.00846	1.28428	1.69125e-18
	0.00843	1.44482	1.68543e-18
	0.0084	1.60535	1.67962e-18
	0.00838	1.76589	1.67381e-18
	0.00835	1.92642	1.668e-18
	0.00832	2.08696	1.66219e-18
	0.00829	2.24749	1.65637e-18
	0.00826	2.40803	1.65056e-18
	0.00823	2.56856	1.64475e-18
	0.0082	2.7291	1.63894e-18
	0.00817	2.88963	1.63313e-18
	0.00814	3.05017	1.62732e-18
	0.00811	3.2107	1.6215e-18
	0.00808	3.37124	1.61569e-18
	0.00806	3.53177	1.60988e-18
	0.00803	3.69231	1.60407e-18
	0.008	3.85284	1.59826e-18
	0.00797	4.01338	1.59244e-18
	0.00794	4.17391	1.58663e-18
	0.00791	4.33445	1.58082e-18
	0.00788	4.49498	1.57501e-18
	0.00785	4.65552	1.5692e-18
	0.00782	4.81605	1.56339e-18
	0.00779	4.97659	1.55757e-18
	0.00777	5.13712	1.55176e-18
	0.00774	5.29766	1.54595e-18
	0.00771	5.45819	1.54014e-18
	0.00768	5.61873	1.53433e-18
	0.00765	5.77926	1.52851e-18
	0.00762	5.9398	1.5227e-18
	0.00759	6.10033	1.51689e-18
	0.00756	6.26087	1.51108e-18
	0.00753	6.4214	1.50527e-18
	0.0075	6.58194	1.49945e-18
	0.00747	6.74247	1.49364e-18
	0.00745	6.90301	1.48783e-18
	0.00742	7.06355	1.48202e-18
	0.00739	7.22408	1.47621e-18
	0.00736	7.38462	1.4704e-18
	0.00733	7.54515	1.46458e-18
	0.0073	7.70569	1.45877e-18
	0.00727	7.86622	1.45296e-18
	0.00724	8.02676	1.44715e-18
	0.00721	8.18729	1.44134e-18
	0.00718	8.34783	1.43552e-18
	0.00715	8.50836	1.42971e-18
	0.00713	8.6689	1.4239e-18
	0.0071	8.82943	1.41809e-18
	0.00707	8.98997	1.41228e-18
	0.00704	9.1505	1.40647e-18
	0.00701	9.31104	1.40065e-18
	0.00698	9.47157	1.39484e-18
	0.00695	9.63211	1.38903e-18
	0.00692	9.79264	1.38322e-18
	0.00689	9.95318	1.37741e-18
	0.00686	10.1137	1.37159e-18
	0.00683	10.2743	1.36578e-18
	0.00681	10.4348	1.35997e-18
	0.00678	10.5953	1.35416e-18
	0.00675	10.7559	1.34835e-18
	0.00672	10.9164	1.34254e-18
	0.00669	11.0769	1.33672e-18
	0.00666	11.2375	1.33091e-18
	0.00663	11.398	1.3251e-18
	0.0066	11.5585	1.31929e-18
	0.00657	11.7191	1.31348e-18
	0.00654	11.8796	1.30766e-18
	0.00651	12.0401	1.30185e-18
	0.00649	12.2007	1.29604e-18
	0.00646	12.3612	1.29023e-18
	0.00643	12.5217	1.28442e-18
	0.0064	12.6823	1.2786e-18
	0.00637	12.8428	1.27279e-18
	0.00634	13.0033	1.26698e-18
	0.00631	13.1639	1.26117e-18
	0.00628	13.3244	1.25536e-18
	0.00625	13.4849	1.24955e-18
	0.00622	13.6455	1.24373e-18
	0.00619	13.806	1.23792e-18
	0.00617	13.9666	1.23211e-18
	0.00614	14.1271	1.2263e-18
	0.00611	14.2876	1.22049e-18
	0.00608	14.4482	1.21467e-18
	0.00605	14.6087	1.20886e-18
	0.00602	14.7692	1.20305e-18
	0.00599	14.9298	1.19724e-18
	0.00596	15.0903	1.19143e-18
	0.00593	15.2508	1.18562e-18
	0.0059	15.4114	1.1798e-18
	0.00587	15.5719	1.17399e-18
	0.00585	15.7324	1.16818e-18
	0.00582	15.893	1.16237e-18
	0.00579	16.0535	1.15656e-18
	0.00576	16.2141	1.15074e-18
	0.00573	16.3746	1.14493e-18
	0.0057	16.5351	1.13912e-18
	0.00567	16.6957	1.13331e-18
	0.00564	16.8562	1.1275e-18
	0.00561	17.0167	1.12169e-18
	0.00558	17.1773	1.11587e-18
	0.00555	17.3378	1.11006e-18
	0.00553	17.4983	1.10425e-18
	0.0055	17.6589	1.09844e-18
	0.00547	17.8194	1.09263e-18
	0.00544	17.9799	1.08681e-18
	0.00541	18.1405	1.081e-18
	0.00538	18.301	1.07519e-18
	0.00535	18.4615	1.06938e-18
	0.00532	18.6221	1.06357e-18
	0.00529	18.7826	1.05776e-18
	0.00526	18.9431	1.05194e-18
	0.00523	19.1037	1.04613e-18
	0.00521	19.2642	1.04032e-18
	0.00518	19.4247	1.03451e-18
	0.00515	19.5853	1.0287e-18
	0.00512	19.7458	1.02288e-18
	0.00509	19.9063	1.01707e-18
	0.00506	20.0669	1.01126e-18
	0.00503	20.2274	1.00545e-18
	0.005	20.388	9.99637e-19
	0.00497	20.5485	9.93825e-19
	0.00494	20.709	9.88013e-19
	0.00491	20.8696	9.82201e-19
	0.00489	21.0301	9.76389e-19
	0.00486	21.1906	9.70577e-19
	0.00483	21.3512	9.64766e-19
	0.0048	21.5117	9.58954e-19
	0.00477	21.6722	9.53142e-19
	0.00474	21.8328	9.4733e-19
	0.00471	21.9933	9.41518e-19
	0.00468	22.1538	9.35706e-19
	0.00465	22.3144	9.29895e-19
	0.00462	22.4749	9.24083e-19
	0.0046	22.6354	9.18271e-19
	0.00457	22.796	9.12459e-19
	0.00454	22.9565	9.06647e-19
	0.00451	23.1171	9.00835e-19
	0.00448	23.2776	8.95023e-19
	0.00445	23.4381	8.89212e-19
	0.00442	23.5987	8.834e-19
	0.00439	23.7592	8.77588e-19
	0.00436	23.9197	8.71776e-19
	0.00433	24.0803	8.65964e-19
	0.0043	24.2408	8.60152e-19
	0.00428	24.4013	8.54341e-19
	0.00425	24.5619	8.48529e-19
	0.00422	24.7224	8.42717e-19
	0.00419	24.8829	8.36905e-19
	0.00416	25.0435	8.31093e-19
	0.00413	25.204	8.25281e-19
	0.0041	25.3646	8.1947e-19
	0.00407	25.5251	8.13658e-19
	0.00404	25.6856	8.07846e-19
	0.00401	25.8462	8.02034e-19
	0.00398	26.0067	7.96222e-19
	0.00396	26.1672	7.9041e-19
	0.00393	26.3278	7.84599e-19
	0.0039	26.4883	7.78787e-19
	0.00387	26.6488	7.72975e-19
	0.00384	26.8094	7.67163e-19
	0.00381	26.9699	7.61351e-19
	0.00378	27.1304	7.55539e-19
	0.00375	27.291	7.49727e-19
	0.00372	27.4515	7.43916e-19
	0.00369	27.612	7.38104e-19
	0.00366	27.7726	7.32292e-19
	0.00364	27.9331	7.2648e-19
	0.00361	28.0937	7.20668e-19
	0.00358	28.2542	7.14856e-19
	0.00355	28.4147	7.09045e-19
	0.00352	28.5753	7.03233e-19
	0.00349	28.7358	6.97421e-19
	0.00346	28.8963	6.91609e-19
	0.00343	29.0569	6.85797e-19
	0.0034	29.2174	6.79985e-19
	0.00337	29.3779	6.74174e-19
	0.00334	29.5385	6.68362e-19
	0.00332	29.699	6.6255e-19
	0.00329	29.8595	6.56738e-19
	0.00326	30.0201	6.50926e-19
	0.00323	30.1806	6.45114e-19
	0.0032	30.3411	6.39302e-19
	0.00317	30.5017	6.33491e-19
	0.00314	30.6622	6.27679e-19
	0.00311	30.8227	6.21867e-19
	0.00308	30.9833	6.16055e-19
	0.00305	31.1438	6.10243e-19
	0.00302	31.3043	6.04431e-19
	0.003	31.4649	5.9862e-19
	0.00297	31.6254	5.92808e-19
	0.00294	31.7859	5.86996e-19
	0.00291	31.9465	5.81184e-19
	0.00288	32.107	5.75372e-19
	0.00285	32.2676	5.6956e-19
	0.00282	32.4281	5.63749e-19
	0.00279	32.5886	5.57937e-19
	0.00276	32.7492	5.52125e-19
	0.00273	32.9097	5.46313e-19
	0.0027	33.0702	5.40501e-19
	0.00268	33.2308	5.34689e-19
	0.00265	33.3913	5.28878e-19
	0.00262	33.5518	5.23066e-19
	0.00259	33.7124	5.17254e-19
	0.00256	33.8729	5.11442e-19
	0.00253	34.0334	5.0563e-19
	0.0025	34.194	4.99818e-19
	0.00247	34.3545	4.94006e-19
	0.00244	34.5151	4.88195e-19
	0.00241	34.6756	4.82383e-19
	0.00238	34.8361	4.76571e-19
	0.00236	34.9967	4.70759e-19
	0.00233	35.1572	4.64947e-19
	0.0023	35.3177	4.59135e-19
	0.00227	35.4783	4.53324e-19
	0.00224	35.6388	4.47512e-19
	0.00221	35.7993	4.417e-19
	0.00218	35.9599	4.35888e-19
	0.00215	36.1204	4.30076e-19
	0.00212	36.2809	4.24264e-19
	0.00209	36.4415	4.18453e-19
	0.00206	36.602	4.12641e-19
	0.00204	36.7625	4.06829e-19
	0.00201	36.9231	4.01017e-19
	0.00198	37.0836	3.95205e-19
	0.00195	37.2441	3.89393e-19
	0.00192	37.4047	3.83581e-19
	0.00189	37.5652	3.7777e-19
	0.00186	37.7257	3.71958e-19
	0.00183	37.8863	3.66146e-19
	0.0018	38.0468	3.60334e-19
	0.00177	38.2074	3.54522e-19
	0.00174	38.3679	3.4871e-19
	0.00172	38.5284	3.42899e-19
	0.00169	38.689	3.37087e-19
	0.00166	38.8495	3.31275e-19
	0.00163	39.01	3.25463e-19
	0.0016	39.1706	3.19651e-19
	0.00157	39.3311	3.13839e-19
	0.00154	39.4916	3.08028e-19
	0.00151	39.6522	3.02216e-19
	0.00148	39.8127	2.96404e-19
	0.00145	39.9732	2.90592e-19
	0.00143	40.1338	2.8478e-19
	0.0014	40.2943	2.78968e-19
	0.00137	40.4549	2.73157e-19
	0.00134	40.6154	2.67345e-19
	0.00131	40.7759	2.61533e-19
	0.00128	40.9365	2.55721e-19
	0.00125	41.097	2.49909e-19
	0.00122	41.2575	2.44097e-19
	0.00119	41.4181	2.38285e-19
	0.00116	41.5786	2.32474e-19
	0.00113	41.7391	2.26662e-19
	0.00111	41.8997	2.2085e-19
	0.00108	42.0602	2.15038e-19
	0.00105	42.2207	2.09226e-19
	0.00102	42.3813	2.03414e-19
	0.000988803	42.5418	1.97603e-19
	0.000959721	42.7023	1.91791e-19
	0.000930638	42.8629	1.85979e-19
	0.000901556	43.0234	1.80167e-19
	0.000872473	43.184	1.74355e-19
	0.000843391	43.3445	1.68543e-19
	0.000814309	43.505	1.62732e-19
	0.000785226	43.6656	1.5692e-19
	0.000756144	43.8261	1.51108e-19
	0.000727061	43.9866	1.45296e-19
	0.000697979	44.1472	1.39484e-19
	0.000668896	44.3077	1.33672e-19
	0.000639814	44.4682	1.27861e-19
	0.000610731	44.6288	1.22049e-19
	0.000581649	44.7893	1.16237e-19
	0.000552567	44.9498	1.10425e-19
	0.000523484	45.1104	1.04613e-19
	0.000494402	45.2709	9.88013e-20
	0.000465319	45.4314	9.29895e-20
	0.000436237	45.592	8.71776e-20
	0.000407154	45.7525	8.13658e-20
	0.000378072	45.913	7.55539e-20
	0.000348989	46.0736	6.97421e-20
	0.000319907	46.2341	6.39303e-20
	0.000290825	46.3946	5.81184e-20
	0.000261742	46.5552	5.23066e-20
	0.00023266	46.7157	4.64947e-20
	0.000203577	46.8762	4.06829e-20
	0.000174495	47.0368	3.4871e-20
	0.000145412	47.1973	2.90592e-20
	0.00011633	47.3579	2.32474e-20
	8.72474e-05	47.5184	1.74355e-20
	5.81649e-05	47.6789	1.16237e-20
	2.90825e-05	47.8395	5.81184e-21
	1.81159e-11	48	3.62029e-27
	0.01304	0	5.21322e-18
	0.013	0.16054	5.19579e-18
	0.01296	0.32107	5.17835e-18
	0.01291	0.48161	5.16091e-18
	0.01287	0.64214	5.14348e-18
	0.01283	0.80268	5.12604e-18
	0.01278	0.96321	5.10861e-18
	0.01274	1.12375	5.09117e-18
	0.01269	1.28428	5.07374e-18
	0.01265	1.44482	5.0563e-18
	0.01261	1.60535	5.03887e-18
	0.01256	1.76589	5.02143e-18
	0.01252	1.92642	5.00399e-18
	0.01248	2.08696	4.98656e-18
	0.01243	2.24749	4.96912e-18
	0.01239	2.40803	4.95169e-18
	0.01235	2.56856	4.93425e-18
	0.0123	2.7291	4.91682e-18
	0.01226	2.88963	4.89938e-18
	0.01221	3.05017	4.88195e-18
	0.01217	3.2107	4.86451e-18
	0.01213	3.37124	4.84708e-18
	0.01208	3.53177	4.82964e-18
	0.01204	3.69231	4.8122e-18
	0.012	3.85284	4.79477e-18
	0.01195	4.01338	4.77733e-18
	0.01191	4.17391	4.7599e-18
	0.01187	4.33445	4.74246e-18
	0.01182	4.49498	4.72503e-18
	0.01178	4.65552	4.70759e-18
	0.01173	4.81605	4.69016e-18
	0.01169	4.97659	4.67272e-18
	0.01165	5.13712	4.65528e-18
	0.0116	5.29766	4.63785e-18
	0.01156	5.45819	4.62041e-18
	0.01152	5.61873	4.60298e-18
	0.01147	5.77926	4.58554e-18
	0.01143	5.9398	4.56811e-18
	0.01139	6.10033	4.55067e-18
	0.01134	6.26087	4.53324e-18
	0.0113	6.4214	4.5158e-18
	0.01125	6.58194	4.49836e-18
	0.01121	6.74247	4.48093e-18
	0.01117	6.90301	4.46349e-18
	0.01112	7.06355	4.44606e-18
	0.01108	7.22408	4.42862e-18
	0.01104	7.38462	4.41119e-18
	0.01099	7.54515	4.39375e-18
	0.01095	7.70569	4.37632e-18
	0.01091	7.86622	4.35888e-18
	0.01086	8.02676	4.34145e-18
	0.01082	8.18729	4.32401e-18
	0.01078	8.34783	4.30657e-18
	0.01073	8.50836	4.28914e-18
	0.01069	8.6689	4.2717e-18
	0.01064	8.82943	4.25427e-18
	0.0106	8.98997	4.23683e-18
	0.01056	9.1505	4.2194e-18
	0.01051	9.31104	4.20196e-18
	0.01047	9.47157	4.18453e-18
	0.01043	9.63211	4.16709e-18
	0.01038	9.79264	4.14965e-18
	0.01034	9.95318	4.13222e-18
	0.0103	10.1137	4.11478e-18
	0.01025	10.2743	4.09735e-18
	0.01021	10.4348	4.07991e-18
	0.01016	10.5953	4.06248e-18
	0.01012	10.7559	4.04504e-18
	0.01008	10.9164	4.02761e-18
	0.01003	11.0769	4.01017e-18
	0.00999	11.2375	3.99273e-18
	0.00995	11.398	3.9753e-18
	0.0099	11.5585	3.95786e-18
	0.00986	11.7191	3.94043e-18
	0.00982	11.8796	3.92299e-18
	0.00977	12.0401	3.90556e-18
	0.00973	12.2007	3.88812e-18
	0.00968	12.3612	3.87069e-18
	0.00964	12.5217	3.85325e-18
	0.0096	12.6823	3.83581e-18
	0.00955	12.8428	3.81838e-18
	0.00951	13.0033	3.80094e-18
	0.00947	13.1639	3.78351e-18
	0.00942	13.3244	3.76607e-18
	0.00938	13.4849	3.74864e-18
	0.00934	13.6455	3.7312e-18
	0.00929	13.806	3.71377e-18
	0.00925	13.9666	3.69633e-18
	0.0092	14.1271	3.6789e-18
	0.00916	14.2876	3.66146e-18
	0.00912	14.4482	3.64402e-18
	0.00907	14.6087	3.62659e-18
	0.00903	14.7692	3.60915e-18
	0.00899	14.9298	3.59172e-18
	0.00894	15.0903	3.57428e-18
	0.0089	15.2508	3.55685e-18
	0.00886	15.4114	3.53941e-18
	0.00881	15.5719	3.52198e-18
	0.00877	15.7324	3.50454e-18
	0.00872	15.893	3.4871e-18
	0.00868	16.0535	3.46967e-18
	0.00864	16.2141	3.45223e-18
	0.00859	16.3746	3.4348e-18
	0.00855	16.5351	3.41736e-18
	0.00851	16.6957	3.39993e-18
	0.00846	16.8562	3.38249e-18
	0.00842	17.0167	3.36506e-18
	0.00838	17.1773	3.34762e-18
	0.00833	17.3378	3.33018e-18
	0.00829	17.4983	3.31275e-18
	0.00824	17.6589	3.29531e-18
	0.0082	17.8194	3.27788e-18
	0.00816	17.9799	3.26044e-18
	0.00811	18.1405	3.24301e-18
	0.00807	18.301	3.22557e-18
	0.00803	18.4615	3.20814e-18
	0.00798	18.6221	3.1907e-18
	0.00794	18.7826	3.17327e-18
	0.0079	18.9431	3.15583e-18
	0.00785	19.1037	3.13839e-18
	0.00781	19.2642	3.12096e-18
	0.00777	19.4247	3.10352e-18
	0.00772	19.5853	3.08609e-18
	0.00768	19.7458	3.06865e-18
	0.00763	19.9063	3.05122e-18
	0.00759	20.0669	3.03378e-18
	0.00755	20.2274	3.01635e-18
	0.0075	20.388	2.99891e-18
	0.00746	20.5485	2.98147e-18
	0.00742	20.709	2.96404e-18
	0.00737	20.8696	2.9466e-18
	0.00733	21.0301	2.92917e-18
	0.00729	21.1906	2.91173e-18
	0.00724	21.3512	2.8943e-18
	0.0072	21.5117	2.87686e-18
	0.00715	21.6722	2.85943e-18
	0.00711	21.8328	2.84199e-18
	0.00707	21.9933	2.82455e-18
	0.00702	22.1538	2.80712e-18
	0.00698	22.3144	2.78968e-18
	0.00694	22.4749	2.77225e-18
	0.00689	22.6354	2.75481e-18
	0.00685	22.796	2.73738e-18
	0.00681	22.9565	2.71994e-18
	0.00676	23.1171	2.70251e-18
	0.00672	23.2776	2.68507e-18
	0.00667	23.4381	2.66763e-18
	0.00663	23.5987	2.6502e-18
	0.00659	23.7592	2.63276e-18
	0.00654	23.9197	2.61533e-18
	0.0065	24.0803	2.59789e-18
	0.00646	24.2408	2.58046e-18
	0.00641	24.4013	2.56302e-18
	0.00637	24.5619	2.54559e-18
	0.00633	24.7224	2.52815e-18
	0.00628	24.8829	2.51072e-18
	0.00624	25.0435	2.49328e-18
	0.00619	25.204	2.47584e-18
	0.00615	25.3646	2.45841e-18
	0.00611	25.5251	2.44097e-18
	0.00606	25.6856	2.42354e-18
	0.00602	25.8462	2.4061e-18
	0.00598	26.0067	2.38867e-18
	0.00593	26.1672	2.37123e-18
	0.00589	26.3278	2.3538e-18
	0.00585	26.4883	2.33636e-18
	0.0058	26.6488	2.31892e-18
	0.00576	26.8094	2.30149e-18
	0.00571	26.9699	2.28405e-18
	0.00567	27.1304	2.26662e-18
	0.00563	27.291	2.24918e-18
	0.00558	27.4515	2.23175e-18
	0.00554	27.612	2.21431e-18
	0.0055	27.7726	2.19688e-18
	0.00545	27.9331	2.17944e-18
	0.00541	28.0937	2.162e-18
	0.00537	28.2542	2.14457e-18
	0.00532	28.4147	2.12713e-18
	0.00528	28.5753	2.1097e-18
	0.00523	28.7358	2.09226e-18
	0.00519	28.8963	2.07483e-18
	0.00515	29.0569	2.05739e-18
	0.0051	29.2174	2.03996e-18
	0.00506	29.3779	2.02252e-18
	0.00502	29.5385	2.00509e-18
	0.00497	29.699	1.98765e-18
	0.00493	29.8595	1.97021e-18
	0.00489	30.0201	1.95278e-18
	0.00484	30.1806	1.93534e-18
	0.0048	30.3411	1.91791e-18
	0.00475	30.5017	1.90047e-18
	0.00471	30.6622	1.88304e-18
	0.00467	30.8227	1.8656e-18
	0.00462	30.9833	1.84817e-18
	0.00458	31.1438	1.83073e-18
	0.00454	31.3043	1.81329e-18
	0.00449	31.4649	1.79586e-18
	0.00445	31.6254	1.77842e-18
	0.00441	31.7859	1.76099e-18
	0.00436	31.9465	1.74355e-18
	0.00432	32.107	1.72612e-18
	0.00428	32.2676	1.70868e-18
	0.00423	32.4281	1.69125e-18
	0.00419	32.5886	1.67381e-18
	0.00414	32.7492	1.65637e-18
	0.0041	32.9097	1.63894e-18
	0.00406	33.0702	1.6215e-18
	0.00401	33.2308	1.60407e-18
	0.00397	33.3913	1.58663e-18
	0.00393	33.5518	1.5692e-18
	0.00388	33.7124	1.55176e-18
	0.00384	33.8729	1.53433e-18
	0.0038	34.0334	1.51689e-18
	0.00375	34.194	1.49945e-18
	0.00371	34.3545	1.48202e-18
	0.00366	34.5151	1.46458e-18
	0.00362	34.6756	1.44715e-18
	0.00358	34.8361	1.42971e-18
	0.00353	34.9967	1.41228e-18
	0.00349	35.1572	1.39484e-18
	0.00345	35.3177	1.37741e-18
	0.0034	35.4783	1.35997e-18
	0.00336	35.6388	1.34254e-18
	0.00332	35.7993	1.3251e-18
	0.00327	35.9599	1.30766e-18
	0.00323	36.1204	1.29023e-18
	0.00318	36.2809	1.27279e-18
	0.00314	36.4415	1.25536e-18
	0.0031	36.602	1.23792e-18
	0.00305	36.7625	1.22049e-18
	0.00301	36.9231	1.20305e-18
	0.00297	37.0836	1.18562e-18
	0.00292	37.2441	1.16818e-18
	0.00288	37.4047	1.15074e-18
	0.00284	37.5652	1.13331e-18
	0.00279	37.7257	1.11587e-18
	0.00275	37.8863	1.09844e-18
	0.0027	38.0468	1.081e-18
	0.00266	38.2074	1.06357e-18
	0.00262	38.3679	1.04613e-18
	0.00257	38.5284	1.0287e-18
	0.00253	38.689	1.01126e-18
	0.00249	38.8495	9.93825e-19
	0.00244	39.01	9.76389e-19
	0.0024	39.1706	9.58954e-19
	0.00236	39.3311	9.41518e-19
	0.00231	39.4916	9.24083e-19
	0.00227	39.6522	9.06647e-19
	0.00222	39.8127	8.89212e-19
	0.00218	39.9732	8.71776e-19
	0.00214	40.1338	8.54341e-19
	0.00209	40.2943	8.36905e-19
	0.00205	40.4549	8.1947e-19
	0.00201	40.6154	8.02034e-19
	0.00196	40.7759	7.84599e-19
	0.00192	40.9365	7.67163e-19
	0.00188	41.097	7.49727e-19
	0.00183	41.2575	7.32292e-19
	0.00179	41.4181	7.14856e-19
	0.00174	41.5786	6.97421e-19
	0.0017	41.7391	6.79985e-19
	0.00166	41.8997	6.6255e-19
	0.00161	42.0602	6.45114e-19
	0.00157	42.2207	6.27679e-19
	0.00153	42.3813	6.10243e-19
	0.00148	42.5418	5.92808e-19
	0.00144	42.7023	5.75372e-19
	0.0014	42.8629	5.57937e-19
	0.00135	43.0234	5.40501e-19
	0.00131	43.184	5.23066e-19
	0.00127	43.3445	5.0563e-19
	0.00122	43.505	4.88195e-19
	0.00118	43.6656	4.70759e-19
	0.00113	43.8261	4.53324e-19
	0.00109	43.9866	4.35888e-19
	0.00105	44.1472	4.18453e-19
	0.001	44.3077	4.01017e-19
	0.000959721	44.4682	3.83582e-19
	0.000916097	44.6288	3.66146e-19
	0.000872473	44.7893	3.4871e-19
	0.00082885	44.9498	3.31275e-19
	0.000785226	45.1104	3.13839e-19
	0.000741602	45.2709	2.96404e-19
	0.000697979	45.4314	2.78968e-19
	0.000654355	45.592	2.61533e-19
	0.000610731	45.7525	2.44097e-19
	0.000567108	45.913	2.26662e-19
	0.000523484	46.0736	2.09226e-19
	0.00047986	46.2341	1.91791e-19
	0.000436237	46.3946	1.74355e-19
	0.000392613	46.5552	1.5692e-19
	0.000348989	46.7157	1.39484e-19
	0.000305366	46.8762	1.22049e-19
	0.000261742	47.0368	1.04613e-19
	0.000218118	47.1973	8.71776e-20
	0.000174495	47.3579	6.97421e-20
	0.000130871	47.5184	5.23066e-20
	8.72474e-05	47.6789	3.48711e-20
	4.36237e-05	47.8395	1.74355e-20
	2.71739e-11	48	1.08609e-26
	0.01739	0	1.04264e-17
	0.01733	0.16054	1.03916e-17
	0.01727	0.32107	1.03567e-17
	0.01722	0.48161	1.03218e-17
	0.01716	0.64214	1.0287e-17
	0.0171	0.80268	1.02521e-17
	0.01704	0.96321	1.02172e-17
	0.01698	1.12375	1.01823e-17
	0.01693	1.28428	1.01475e-17
	0.01687	1.44482	1.01126e-17
	0.01681	1.60535	1.00777e-17
	0.01675	1.76589	1.00429e-17
	0.01669	1.92642	1.0008e-17
	0.01664	2.08696	9.97312e-18
	0.01658	2.24749	9.93825e-18
	0.01652	2.40803	9.90338e-18
	0.01646	2.56856	9.86851e-18
	0.0164	2.7291	9.83363e-18
	0.01634	2.88963	9.79876e-18
	0.01629	3.05017	9.76389e-18
	0.01623	3.2107	9.72902e-18
	0.01617	3.37124	9.69415e-18
	0.01611	3.53177	9.65928e-18
	0.01605	3.69231	9.62441e-18
	0.016	3.85284	9.58954e-18
	0.01594	4.01338	9.55467e-18
	0.01588	4.17391	9.5198e-18
	0.01582	4.33445	9.48492e-18
	0.01576	4.49498	9.45005e-18
	0.0157	4.65552	9.41518e-18
	0.01565	4.81605	9.38031e-18
	0.01559	4.97659	9.34544e-18
	0.01553	5.13712	9.31057e-18
	0.01547	5.29766	9.2757e-18
	0.01541	5.45819	9.24083e-18
	0.01536	5.61873	9.20596e-18
	0.0153	5.77926	9.17108e-18
	0.01524	5.9398	9.13621e-18
	0.01518	6.10033	9.10134e-18
	0.01512	6.26087	9.06647e-18
	0.01506	6.4214	9.0316e-18
	0.01501	6.58194	8.99673e-18
	0.01495	6.74247	8.96186e-18
	0.01489	6.90301	8.92699e-18
	0.01483	7.06355	8.89212e-18
	0.01477	7.22408	8.85725e-18
	0.01472	7.38462	8.82237e-18
	0.01466	7.54515	8.7875e-18
	0.0146	7.70569	8.75263e-18
	0.01454	7.86622	8.71776e-18
	0.01448	8.02676	8.68289e-18
	0.01442	8.18729	8.64802e-18
	0.01437	8.34783	8.61315e-18
	0.01431	8.50836	8.57828e-18
	0.01425	8.6689	8.54341e-18
	0.01419	8.82943	8.50853e-18
	0.01413	8.98997	8.47366e-18
	0.01408	9.1505	8.43879e-18
	0.01402	9.31104	8.40392e-18
	0.01396	9.47157	8.36905e-18
	0.0139	9.63211	8.33418e-18
	0.01384	9.79264	8.29931e-18
	0.01379	9.95318	8.26444e-18
	0.01373	10.1137	8.22957e-18
	0.01367	10.2743	8.1947e-18
	0.01361	10.4348	8.15982e-18
	0.01355	10.5953	8.12495e-18
	0.01349	10.7559	8.09008e-18
	0.01344	10.9164	8.05521e-18
	0.01338	11.0769	8.02034e-18
	0.01332	11.2375	7.98547e-18
	0.01326	11.398	7.9506e-18
	0.0132	11.5585	7.91573e-18
	0.01315	11.7191	7.88086e-18
	0.01309	11.8796	7.84599e-18
	0.01303	12.0401	7.81111e-18
	0.01297	12.2007	7.77624e-18
	0.01291	12.3612	7.74137e-18
	0.01285	12.5217	7.7065e-18
	0.0128	12.6823	7.67163e-18
	0.01274	12.8428	7.63676e-18
	0.01268	13.0033	7.60189e-18
	0.01262	13.1639	7.56702e-18
	0.01256	13.3244	7.53215e-18
	0.01251	13.4849	7.49727e-18
	0.01245	13.6455	7.4624e-18
	0.01239	13.806	7.42753e-18
	0.01233	13.9666	7.39266e-18
	0.01227	14.1271	7.35779e-18
	0.01221	14.2876	7.32292e-18
	0.01216	14.4482	7.28805e-18
	0.0121	14.6087	7.25318e-18
	0.01204	14.7692	7.21831e-18
	0.01198	14.9298	7.18344e-18
	0.01192	15.0903	7.14856e-18
	0.01187	15.2508	7.11369e-18
	0.01181	15.4114	7.07882e-18
	0.01175	15.5719	7.04395e-18
	0.01169	15.7324	7.00908e-18
	0.01163	15.893	6.97421e-18
	0.01157	16.0535	6.93934e-18
	0.01152	16.2141	6.90447e-18
	0.01146	16.3746	6.8696e-18
	0.0114	16.5351	6.83472e-18
	0.01134	16.6957	6.79985e-18
	0.01128	16.8562	6.76498e-18
	0.01123	17.0167	6.73011e-18
	0.01117	17.1773	6.69524e-18
	0.01111	17.3378	6.66037e-18
	0.01105	17.4983	6.6255e-18
	0.01099	17.6589	6.59063e-18
	0.01094	17.8194	6.55576e-18
	0.01088	17.9799	6.52089e-18
	0.01082	18.1405	6.48601e-18
	0.01076	18.301	6.45114e-18
	0.0107	18.4615	6.41627e-18
	0.01064	18.6221	6.3814e-18
	0.01059	18.7826	6.34653e-18
	0.01053	18.9431	6.31166e-18
	0.01047	19.1037	6.27679e-18
	0.01041	19.2642	6.24192e-18
	0.01035	19.4247	6.20705e-18
	0.0103	19.5853	6.17217e-18
	0.01024	19.7458	6.1373e-18
	0.01018	19.9063	6.10243e-18
	0.01012	20.0669	6.06756e-18
	0.01006	20.2274	6.03269e-18
	0.01	20.388	5.99782e-18
	0.00995	20.5485	5.96295e-18
	0.00989	20.709	5.92808e-18
	0.00983	20.8696	5.89321e-18
	0.00977	21.0301	5.85834e-18
	0.00971	21.1906	5.82346e-18
	0.00966	21.3512	5.78859e-18
	0.0096	21.5117	5.75372e-18
	0.00954	21.6722	5.71885e-18
	0.00948	21.8328	5.68398e-18
	0.00942	21.9933	5.64911e-18
	0.00936	22.1538	5.61424e-18
	0.00931	22.3144	5.57937e-18
	0.00925	22.4749	5.5445e-18
	0.00919	22.6354	5.50963e-18
	0.00913	22.796	5.47475e-18
	0.00907	22.9565	5.43988e-18
	0.00902	23.1171	5.40501e-18
	0.00896	23.2776	5.37014e-18
	0.0089	23.4381	5.33527e-18
	0.00884	23.5987	5.3004e-18
	0.00878	23.7592	5.26553e-18
	0.00872	23.9197	5.23066e-18
	0.00867	24.0803	5.19579e-18
	0.00861	24.2408	5.16091e-18
	0.00855	24.4013	5.12604e-18
	0.00849	24.5619	5.09117e-18
	0.00843	24.7224	5.0563e-18
	0.00838	24.8829	5.02143e-18
	0.00832	25.0435	4.98656e-18
	0.00826	25.204	4.95169e-18
	0.0082	25.3646	4.91682e-18
	0.00814	25.5251	4.88195e-18
	0.00808	25.6856	4.84708e-18
	0.00803	25.8462	4.8122e-18
	0.00797	26.0067	4.77733e-18
	0.00791	26.1672	4.74246e-18
	0.00785	26.3278	4.70759e-18
	0.00779	26.4883	4.67272e-18
	0.00774	26.6488	4.63785e-18
	0.00768	26.8094	4.60298e-18
	0.00762	26.9699	4.56811e-18
	0.00756	27.1304	4.53324e-18
	0.0075	27.291	4.49836e-18
	0.00745	27.4515	4.46349e-18
	0.00739	27.612	4.42862e-18
	0.00733	27.7726	4.39375e-18
	0.00727	27.9331	4.35888e-18
	0.00721	28.0937	4.32401e-18
	0.00715	28.2542	4.28914e-18
	0.0071	28.4147	4.25427e-18
	0.00704	28.5753	4.2194e-18
	0.00698	28.7358	4.18453e-18
	0.00692	28.8963	4.14965e-18
	0.00686	29.0569	4.11478e-18
	0.00681	29.2174	4.07991e-18
	0.00675	29.3779	4.04504e-18
	0.00669	29.5385	4.01017e-18
	0.00663	29.699	3.9753e-18
	0.00657	29.8595	3.94043e-18
	0.00651	30.0201	3.90556e-18
	0.00646	30.1806	3.87069e-18
	0.0064	30.3411	3.83581e-18
	0.00634	30.5017	3.80094e-18
	0.00628	30.6622	3.76607e-18
	0.00622	30.8227	3.7312e-18
	0.00617	30.9833	3.69633e-18
	0.00611	31.1438	3.66146e-18
	0.00605	31.3043	3.62659e-18
	0.00599	31.4649	3.59172e-18
	0.00593	31.6254	3.55685e-18
	0.00587	31.7859	3.52198e-18
	0.00582	31.9465	3.4871e-18
	0.00576	32.107	3.45223e-18
	0.0057	32.2676	3.41736e-18
	0.00564	32.4281	3.38249e-18
	0.00558	32.5886	3.34762e-18
	0.00553	32.7492	3.31275e-18
	0.00547	32.9097	3.27788e-18
	0.00541	33.0702	3.24301e-18
	0.00535	33.2308	3.20814e-18
	0.00529	33.3913	3.17327e-18
	0.00523	33.5518	3.13839e-18
	0.00518	33.7124	3.10352e-18
	0.00512	33.8729	3.06865e-18
	0.00506	34.0334	3.03378e-18
	0.005	34.194	2.99891e-18
	0.00494	34.3545	2.96404e-18
	0.00489	34.5151	2.92917e-18
	0.00483	34.6756	2.8943e-18
	0.00477	34.8361	2.85943e-18
	0.00471	34.9967	2.82455e-18
	0.00465	35.1572	2.78968e-18
	0.0046	35.3177	2.75481e-18
	0.00454	35.4783	2.71994e-18
	0.00448	35.6388	2.68507e-18
	0.00442	35.7993	2.6502e-18
	0.00436	35.9599	2.61533e-18
	0.0043	36.1204	2.58046e-18
	0.00425	36.2809	2.54559e-18
	0.00419	36.4415	2.51072e-18
	0.00413	36.602	2.47584e-18
	0.00407	36.7625	2.44097e-18
	0.00401	36.9231	2.4061e-18
	0.00396	37.0836	2.37123e-18
	0.0039	37.2441	2.33636e-18
	0.00384	37.4047	2.30149e-18
	0.00378	37.5652	2.26662e-18
	0.00372	37.7257	2.23175e-18
	0.00366	37.8863	2.19688e-18
	0.00361	38.0468	2.162e-18
	0.00355	38.2074	2.12713e-18
	0.00349	38.3679	2.09226e-18
	0.00343	38.5284	2.05739e-18
	0.00337	38.689	2.02252e-18
	0.00332	38.8495	1.98765e-18
	0.00326	39.01	1.95278e-18
	0.0032	39.1706	1.91791e-18
	0.00314	39.3311	1.88304e-18
	0.00308	39.4916	1.84817e-18
	0.00302	39.6522	1.81329e-18
	0.00297	39.8127	1.77842e-18
	0.00291	39.9732	1.74355e-18
	0.00285	40.1338	1.70868e-18
	0.00279	40.2943	1.67381e-18
	0.00273	40.4549	1.63894e-18
	0.00268	40.6154	1.60407e-18
	0.00262	40.7759	1.5692e-18
	0.00256	40.9365	1.53433e-18
	0.0025	41.097	1.49945e-18
	0.00244	41.2575	1.46458e-18
	0.00238	41.4181	1.42971e-18
	0.00233	41.5786	1.39484e-18
	0.00227	41.7391	1.35997e-18
	0.00221	41.8997	1.3251e-18
	0.00215	42.0602	1.29023e-18
	0.00209	42.2207	1.25536e-18
	0.00204	42.3813	1.22049e-18
	0.00198	42.5418	1.18562e-18
	0.00192	42.7023	1.15074e-18
	0.00186	42.8629	1.11587e-18
	0.0018	43.0234	1.081e-18
	0.00174	43.184	1.04613e-18
	0.00169	43.3445	1.01126e-18
	0.00163	43.505	9.76389e-19
	0.00157	43.6656	9.41518e-19
	0.00151	43.8261	9.06647e-19
	0.00145	43.9866	8.71776e-19
	0.0014	44.1472	8.36905e-19
	0.00134	44.3077	8.02034e-19
	0.00128	44.4682	7.67163e-19
	0.00122	44.6288	7.32292e-19
	0.00116	44.7893	6.97421e-19
	0.00111	44.9498	6.6255e-19
	0.00105	45.1104	6.27679e-19
	0.000988803	45.2709	5.92808e-19
	0.000930638	45.4314	5.57937e-19
	0.000872473	45.592	5.23066e-19
	0.000814309	45.7525	4.88195e-19
	0.000756144	45.913	4.53324e-19
	0.000697979	46.0736	4.18453e-19
	0.000639814	46.2341	3.83582e-19
	0.000581649	46.3946	3.4871e-19
	0.000523484	46.5552	3.13839e-19
	0.000465319	46.7157	2.78968e-19
	0.000407154	46.8762	2.44097e-19
	0.000348989	47.0368	2.09226e-19
	0.000290825	47.1973	1.74355e-19
	0.00023266	47.3579	1.39484e-19
	0.000174495	47.5184	1.04613e-19
	0.00011633	47.6789	6.97421e-20
	5.81649e-05	47.8395	3.48711e-20
	3.62319e-11	48	2.17218e-26
	0.02174	0	1.73774e-17
	0.02167	0.16054	1.73193e-17
	0.02159	0.32107	1.72612e-17
	0.02152	0.48161	1.7203e-17
	0.02145	0.64214	1.71449e-17
	0.02138	0.80268	1.70868e-17
	0.0213	0.96321	1.70287e-17
	0.02123	1.12375	1.69706e-17
	0.02116	1.28428	1.69125e-17
	0.02108	1.44482	1.68543e-17
	0.02101	1.60535	1.67962e-17
	0.02094	1.76589	1.67381e-17
	0.02087	1.92642	1.668e-17
	0.02079	2.08696	1.66219e-17
	0.02072	2.24749	1.65637e-17
	0.02065	2.40803	1.65056e-17
	0.02058	2.56856	1.64475e-17
	0.0205	2.7291	1.63894e-17
	0.02043	2.88963	1.63313e-17
	0.02036	3.05017	1.62732e-17
	0.02029	3.2107	1.6215e-17
	0.02021	3.37124	1.61569e-17
	0.02014	3.53177	1.60988e-17
	0.02007	3.69231	1.60407e-17
	0.01999	3.85284	1.59826e-17
	0.01992	4.01338	1.59244e-17
	0.01985	4.17391	1.58663e-17
	0.01978	4.33445	1.58082e-17
	0.0197	4.49498	1.57501e-17
	0.01963	4.65552	1.5692e-17
	0.01956	4.81605	1.56339e-17
	0.01949	4.97659	1.55757e-17
	0.01941	5.13712	1.55176e-17
	0.01934	5.29766	1.54595e-17
	0.01927	5.45819	1.54014e-17
	0.01919	5.61873	1.53433e-17
	0.01912	5.77926	1.52851e-17
	0.01905	5.9398	1.5227e-17
	0.01898	6.10033	1.51689e-17
	0.0189	6.26087	1.51108e-17
	0.01883	6.4214	1.50527e-17
	0.01876	6.58194	1.49945e-17
	0.01869	6.74247	1.49364e-17
	0.01861	6.90301	1.48783e-17
	0.01854	7.06355	1.48202e-17
	0.01847	7.22408	1.47621e-17
	0.01839	7.38462	1.4704e-17
	0.01832	7.54515	1.46458e-17
	0.01825	7.70569	1.45877e-17
	0.01818	7.86622	1.45296e-17
	0.0181	8.02676	1.44715e-17
	0.01803	8.18729	1.44134e-17
	0.01796	8.34783	1.43552e-17
	0.01789	8.50836	1.42971e-17
	0.01781	8.6689	1.4239e-17
	0.01774	8.82943	1.41809e-17
	0.01767	8.98997	1.41228e-17
	0.01759	9.1505	1.40647e-17
	0.01752	9.31104	1.40065e-17
	0.01745	9.47157	1.39484e-17
	0.01738	9.63211	1.38903e-17
	0.0173	9.79264	1.38322e-17
	0.01723	9.95318	1.37741e-17
	0.01716	10.1137	1.37159e-17
	0.01709	10.2743	1.36578e-17
	0.01701	10.4348	1.35997e-17
	0.01694	10.5953	1.35416e-17
	0.01687	10.7559	1.34835e-17
	0.0168	10.9164	1.34254e-17
	0.01672	11.0769	1.33672e-17
	0.01665	11.2375	1.33091e-17
	0.01658	11.398	1.3251e-17
	0.0165	11.5585	1.31929e-17
	0.01643	11.7191	1.31348e-17
	0.01636	11.8796	1.30766e-17
	0.01629	12.0401	1.30185e-17
	0.01621	12.2007	1.29604e-17
	0.01614	12.3612	1.29023e-17
	0.01607	12.5217	1.28442e-17
	0.016	12.6823	1.2786e-17
	0.01592	12.8428	1.27279e-17
	0.01585	13.0033	1.26698e-17
	0.01578	13.1639	1.26117e-17
	0.0157	13.3244	1.25536e-17
	0.01563	13.4849	1.24955e-17
	0.01556	13.6455	1.24373e-17
	0.01549	13.806	1.23792e-17
	0.01541	13.9666	1.23211e-17
	0.01534	14.1271	1.2263e-17
	0.01527	14.2876	1.22049e-17
	0.0152	14.4482	1.21467e-17
	0.01512	14.6087	1.20886e-17
	0.01505	14.7692	1.20305e-17
	0.01498	14.9298	1.19724e-17
	0.0149	15.0903	1.19143e-17
	0.01483	15.2508	1.18562e-17
	0.01476	15.4114	1.1798e-17
	0.01469	15.5719	1.17399e-17
	0.01461	15.7324	1.16818e-17
	0.01454	15.893	1.16237e-17
	0.01447	16.0535	1.15656e-17
	0.0144	16.2141	1.15074e-17
	0.01432	16.3746	1.14493e-17
	0.01425	16.5351	1.13912e-17
	0.01418	16.6957	1.13331e-17
	0.0141	16.8562	1.1275e-17
	0.01403	17.0167	1.12169e-17
	0.01396	17.1773	1.11587e-17
	0.01389	17.3378	1.11006e-17
	0.01381	17.4983	1.10425e-17
	0.01374	17.6589	1.09844e-17
	0.01367	17.8194	1.09263e-17
	0.0136	17.9799	1.08681e-17
	0.01352	18.1405	1.081e-17
	0.01345	18.301	1.07519e-17
	0.01338	18.4615	1.06938e-17
	0.01331	18.6221	1.06357e-17
	0.01323	18.7826	1.05776e-17
	0.01316	18.9431	1.05194e-17
	0.01309	19.1037	1.04613e-17
	0.01301	19.2642	1.04032e-17
	0.01294	19.4247	1.03451e-17
	0.01287	19.5853	1.0287e-17
	0.0128	19.7458	1.02288e-17
	0.01272	19.9063	1.01707e-17
	0.01265	20.0669	1.01126e-17
	0.01258	20.2274	1.00545e-17
	0.01251	20.388	9.99637e-18
	0.01243	20.5485	9.93825e-18
	0.01236	20.709	9.88013e-18
	0.01229	20.8696	9.82201e-18
	0.01221	21.0301	9.76389e-18
	0.01214	21.1906	9.70577e-18
	0.01207	21.3512	9.64766e-18
	0.012	21.5117	9.58954e-18
	0.01192	21.6722	9.53142e-18
	0.01185	21.8328	9.4733e-18
	0.01178	21.9933	9.41518e-18
	0.01171	22.1538	9.35706e-18
	0.01163	22.3144	9.29895e-18
	0.01156	22.4749	9.24083e-18
	0.01149	22.6354	9.18271e-18
	0.01141	22.796	9.12459e-18
	0.01134	22.9565	9.06647e-18
	0.01127	23.1171	9.00835e-18
	0.0112	23.2776	8.95023e-18
	0.01112	23.4381	8.89212e-18
	0.01105	23.5987	8.834e-18
	0.01098	23.7592	8.77588e-18
	0.01091	23.9197	8.71776e-18
	0.01083	24.0803	8.65964e-18
	0.01076	24.2408	8.60152e-18
	0.01069	24.4013	8.54341e-18
	0.01062	24.5619	8.48529e-18
	0.01054	24.7224	8.42717e-18
	0.01047	24.8829	8.36905e-18
	0.0104	25.0435	8.31093e-18
	0.01032	25.204	8.25281e-18
	0.01025	25.3646	8.1947e-18
	0.01018	25.5251	8.13658e-18
	0.01011	25.6856	8.07846e-18
	0.01003	25.8462	8.02034e-18
	0.00996	26.0067	7.96222e-18
	0.00989	26.1672	7.9041e-18
	0.00982	26.3278	7.84599e-18
	0.00974	26.4883	7.78787e-18
	0.00967	26.6488	7.72975e-18
	0.0096	26.8094	7.67163e-18
	0.00952	26.9699	7.61351e-18
	0.00945	27.1304	7.55539e-18
	0.00938	27.291	7.49727e-18
	0.00931	27.4515	7.43916e-18
	0.00923	27.612	7.38104e-18
	0.00916	27.7726	7.32292e-18
	0.00909	27.9331	7.2648e-18
	0.00902	28.0937	7.20668e-18
	0.00894	28.2542	7.14856e-18
	0.00887	28.4147	7.09045e-18
	0.0088	28.5753	7.03233e-18
	0.00872	28.7358	6.97421e-18
	0.00865	28.8963	6.91609e-18
	0.00858	29.0569	6.85797e-18
	0.00851	29.2174	6.79985e-18
	0.00843	29.3779	6.74174e-18
	0.00836	29.5385	6.68362e-18
	0.00829	29.699	6.6255e-18
	0.00822	29.8595	6.56738e-18
	0.00814	30.0201	6.50926e-18
	0.00807	30.1806	6.45114e-18
	0.008	30.3411	6.39302e-18
	0.00792	30.5017	6.33491e-18
	0.00785	30.6622	6.27679e-18
	0.00778	30.8227	6.21867e-18
	0.00771	30.9833	6.16055e-18
	0.00763	31.1438	6.10243e-18
	0.00756	31.3043	6.04431e-18
	0.00749	31.4649	5.9862e-18
	0.00742	31.6254	5.92808e-18
	0.00734	31.7859	5.86996e-18
	0.00727	31.9465	5.81184e-18
	0.0072	32.107	5.75372e-18
	0.00713	32.2676	5.6956e-18
	0.00705	32.4281	5.63749e-18
	0.00698	32.5886	5.57937e-18
	0.00691	32.7492	5.52125e-18
	0.00683	32.9097	5.46313e-18
	0.00676	33.0702	5.40501e-18
	0.00669	33.2308	5.34689e-18
	0.00662	33.3913	5.28878e-18
	0.00654	33.5518	5.23066e-18
	0.00647	33.7124	5.17254e-18
	0.0064	33.8729	5.11442e-18
	0.00633	34.0334	5.0563e-18
	0.00625	34.194	4.99818e-18
	0.00618	34.3545	4.94006e-18
	0.00611	34.5151	4.88195e-18
	0.00603	34.6756	4.82383e-18
	0.00596	34.8361	4.76571e-18
	0.00589	34.9967	4.70759e-18
	0.00582	35.1572	4.64947e-18
	0.00574	35.3177	4.59135e-18
	0.00567	35.4783	4.53324e-18
	0.0056	35.6388	4.47512e-18
	0.00553	35.7993	4.417e-18
	0.00545	35.9599	4.35888e-18
	0.00538	36.1204	4.30076e-18
	0.00531	36.2809	4.24264e-18
	0.00523	36.4415	4.18453e-18
	0.00516	36.602	4.12641e-18
	0.00509	36.7625	4.06829e-18
	0.00502	36.9231	4.01017e-18
	0.00494	37.0836	3.95205e-18
	0.00487	37.2441	3.89393e-18
	0.0048	37.4047	3.83581e-18
	0.00473	37.5652	3.7777e-18
	0.00465	37.7257	3.71958e-18
	0.00458	37.8863	3.66146e-18
	0.00451	38.0468	3.60334e-18
	0.00444	38.2074	3.54522e-18
	0.00436	38.3679	3.4871e-18
	0.00429	38.5284	3.42899e-18
	0.00422	38.689	3.37087e-18
	0.00414	38.8495	3.31275e-18
	0.00407	39.01	3.25463e-18
	0.004	39.1706	3.19651e-18
	0.00393	39.3311	3.13839e-18
	0.00385	39.4916	3.08028e-18
	0.00378	39.6522	3.02216e-18
	0.00371	39.8127	2.96404e-18
	0.00364	39.9732	2.90592e-18
	0.00356	40.1338	2.8478e-18
	0.00349	40.2943	2.78968e-18
	0.00342	40.4549	2.73157e-18
	0.00334	40.6154	2.67345e-18
	0.00327	40.7759	2.61533e-18
	0.0032	40.9365	2.55721e-18
	0.00313	41.097	2.49909e-18
	0.00305	41.2575	2.44097e-18
	0.00298	41.4181	2.38285e-18
	0.00291	41.5786	2.32474e-18
	0.00284	41.7391	2.26662e-18
	0.00276	41.8997	2.2085e-18
	0.00269	42.0602	2.15038e-18
	0.00262	42.2207	2.09226e-18
	0.00254	42.3813	2.03414e-18
	0.00247	42.5418	1.97603e-18
	0.0024	42.7023	1.91791e-18
	0.00233	42.8629	1.85979e-18
	0.00225	43.0234	1.80167e-18
	0.00218	43.184	1.74355e-18
	0.00211	43.3445	1.68543e-18
	0.00204	43.505	1.62732e-18
	0.00196	43.6656	1.5692e-18
	0.00189	43.8261	1.51108e-18
	0.00182	43.9866	1.45296e-18
	0.00174	44.1472	1.39484e-18
	0.00167	44.3077	1.33672e-18
	0.0016	44.4682	1.27861e-18
	0.00153	44.6288	1.22049e-18
	0.00145	44.7893	1.16237e-18
	0.00138	44.9498	1.10425e-18
	0.00131	45.1104	1.04613e-18
	0.00124	45.2709	9.88013e-19
	0.00116	45.4314	9.29895e-19
	0.00109	45.592	8.71776e-19
	0.00102	45.7525	8.13658e-19
	0.00094518	45.913	7.55539e-19
	0.000872474	46.0736	6.97421e-19
	0.000799767	46.2341	6.39303e-19
	0.000727061	46.3946	5.81184e-19
	0.000654355	46.5552	5.23066e-19
	0.000581649	46.7157	4.64947e-19
	0.000508943	46.8762	4.06829e-19
	0.000436237	47.0368	3.4871e-19
	0.000363531	47.1973	2.90592e-19
	0.000290825	47.3579	2.32474e-19
	0.000218118	47.5184	1.74355e-19
	0.000145412	47.6789	1.16237e-19
	7.27062e-05	47.8395	5.81184e-20
	4.52899e-11	48	3.62029e-26
	0.02609	0	2.60661e-17
	0.026	0.16054	2.59789e-17
	0.02591	0.32107	2.58918e-17
	0.02583	0.48161	2.58046e-17
	0.02574	0.64214	2.57174e-17
	0.02565	0.80268	2.56302e-17
	0.02556	0.96321	2.5543e-17
	0.02548	1.12375	2.54559e-17
	0.02539	1.28428	2.53687e-17
	0.0253	1.44482	2.52815e-17
	0.02521	1.60535	2.51943e-17
	0.02513	1.76589	2.51072e-17
	0.02504	1.92642	2.502e-17
	0.02495	2.08696	2.49328e-17
	0.02487	2.24749	2.48456e-17
	0.02478	2.40803	2.47584e-17
	0.02469	2.56856	2.46713e-17
	0.0246	2.7291	2.45841e-17
	0.02452	2.88963	2.44969e-17
	0.02443	3.05017	2.44097e-17
	0.02434	3.2107	2.43226e-17
	0.02425	3.37124	2.42354e-17
	0.02417	3.53177	2.41482e-17
	0.02408	3.69231	2.4061e-17
	0.02399	3.85284	2.39738e-17
	0.02391	4.01338	2.38867e-17
	0.02382	4.17391	2.37995e-17
	0.02373	4.33445	2.37123e-17
	0.02364	4.49498	2.36251e-17
	0.02356	4.65552	2.3538e-17
	0.02347	4.81605	2.34508e-17
	0.02338	4.97659	2.33636e-17
	0.0233	5.13712	2.32764e-17
	0.02321	5.29766	2.31892e-17
	0.02312	5.45819	2.31021e-17
	0.02303	5.61873	2.30149e-17
	0.02295	5.77926	2.29277e-17
	0.02286	5.9398	2.28405e-17
	0.02277	6.10033	2.27534e-17
	0.02268	6.26087	2.26662e-17
	0.0226	6.4214	2.2579e-17
	0.02251	6.58194	2.24918e-17
	0.02242	6.74247	2.24046e-17
	0.02234	6.90301	2.23175e-17
	0.02225	7.06355	2.22303e-17
	0.02216	7.22408	2.21431e-17
	0.02207	7.38462	2.20559e-17
	0.02199	7.54515	2.19688e-17
	0.0219	7.70569	2.18816e-17
	0.02181	7.86622	2.17944e-17
	0.02172	8.02676	2.17072e-17
	0.02164	8.18729	2.162e-17
	0.02155	8.34783	2.15329e-17
	0.02146	8.50836	2.14457e-17
	0.02138	8.6689	2.13585e-17
	0.02129	8.82943	2.12713e-17
	0.0212	8.98997	2.11842e-17
	0.02111	9.1505	2.1097e-17
	0.02103	9.31104	2.10098e-17
	0.02094	9.47157	2.09226e-17
	0.02085	9.63211	2.08354e-17
	0.02076	9.79264	2.07483e-17
	0.02068	9.95318	2.06611e-17
	0.02059	10.1137	2.05739e-17
	0.0205	10.2743	2.04867e-17
	0.02042	10.4348	2.03996e-17
	0.02033	10.5953	2.03124e-17
	0.02024	10.7559	2.02252e-17
	0.02015	10.9164	2.0138e-17
	0.02007	11.0769	2.00509e-17
	0.01998	11.2375	1.99637e-17
	0.01989	11.398	1.98765e-17
	0.01981	11.5585	1.97893e-17
	0.01972	11.7191	1.97021e-17
	0.01963	11.8796	1.9615e-17
	0.01954	12.0401	1.95278e-17
	0.01946	12.2007	1.94406e-17
	0.01937	12.3612	1.93534e-17
	0.01928	12.5217	1.92663e-17
	0.01919	12.6823	1.91791e-17
	0.01911	12.8428	1.90919e-17
	0.01902	13.0033	1.90047e-17
	0.01893	13.1639	1.89175e-17
	0.01885	13.3244	1.88304e-17
	0.01876	13.4849	1.87432e-17
	0.01867	13.6455	1.8656e-17
	0.01858	13.806	1.85688e-17
	0.0185	13.9666	1.84817e-17
	0.01841	14.1271	1.83945e-17
	0.01832	14.2876	1.83073e-17
	0.01823	14.4482	1.82201e-17
	0.01815	14.6087	1.81329e-17
	0.01806	14.7692	1.80458e-17
	0.01797	14.9298	1.79586e-17
	0.01789	15.0903	1.78714e-17
	0.0178	15.2508	1.77842e-17
	0.01771	15.4114	1.76971e-17
	0.01762	15.5719	1.76099e-17
	0.01754	15.7324	1.75227e-17
	0.01745	15.893	1.74355e-17
	0.01736	16.0535	1.73483e-17
	0.01727	16.2141	1.72612e-17
	0.01719	16.3746	1.7174e-17
	0.0171	16.5351	1.70868e-17
	0.01701	16.6957	1.69996e-17
	0.01693	16.8562	1.69125e-17
	0.01684	17.0167	1.68253e-17
	0.01675	17.1773	1.67381e-17
	0.01666	17.3378	1.66509e-17
	0.01658	17.4983	1.65637e-17
	0.01649	17.6589	1.64766e-17
	0.0164	17.8194	1.63894e-17
	0.01632	17.9799	1.63022e-17
	0.01623	18.1405	1.6215e-17
	0.01614	18.301	1.61279e-17
	0.01605	18.4615	1.60407e-17
	0.01597	18.6221	1.59535e-17
	0.01588	18.7826	1.58663e-17
	0.01579	18.9431	1.57791e-17
	0.0157	19.1037	1.5692e-17
	0.01562	19.2642	1.56048e-17
	0.01553	19.4247	1.55176e-17
	0.01544	19.5853	1.54304e-17
	0.01536	19.7458	1.53433e-17
	0.01527	19.9063	1.52561e-17
	0.01518	20.0669	1.51689e-17
	0.01509	20.2274	1.50817e-17
	0.01501	20.388	1.49945e-17
	0.01492	20.5485	1.49074e-17
	0.01483	20.709	1.48202e-17
	0.01474	20.8696	1.4733e-17
	0.01466	21.0301	1.46458e-17
	0.01457	21.1906	1.45587e-17
	0.01448	21.3512	1.44715e-17
	0.0144	21.5117	1.43843e-17
	0.01431	21.6722	1.42971e-17
	0.01422	21.8328	1.421e-17
	0.01413	21.9933	1.41228e-17
	0.01405	22.1538	1.40356e-17
	0.01396	22.3144	1.39484e-17
	0.01387	22.4749	1.38612e-17
	0.01379	22.6354	1.37741e-17
	0.0137	22.796	1.36869e-17
	0.01361	22.9565	1.35997e-17
	0.01352	23.1171	1.35125e-17
	0.01344	23.2776	1.34254e-17
	0.01335	23.4381	1.33382e-17
	0.01326	23.5987	1.3251e-17
	0.01317	23.7592	1.31638e-17
	0.01309	23.9197	1.30766e-17
	0.013	24.0803	1.29895e-17
	0.01291	24.2408	1.29023e-17
	0.01283	24.4013	1.28151e-17
	0.01274	24.5619	1.27279e-17
	0.01265	24.7224	1.26408e-17
	0.01256	24.8829	1.25536e-17
	0.01248	25.0435	1.24664e-17
	0.01239	25.204	1.23792e-17
	0.0123	25.3646	1.2292e-17
	0.01221	25.5251	1.22049e-17
	0.01213	25.6856	1.21177e-17
	0.01204	25.8462	1.20305e-17
	0.01195	26.0067	1.19433e-17
	0.01187	26.1672	1.18562e-17
	0.01178	26.3278	1.1769e-17
	0.01169	26.4883	1.16818e-17
	0.0116	26.6488	1.15946e-17
	0.01152	26.8094	1.15074e-17
	0.01143	26.9699	1.14203e-17
	0.01134	27.1304	1.13331e-17
	0.01125	27.291	1.12459e-17
	0.01117	27.4515	1.11587e-17
	0.01108	27.612	1.10716e-17
	0.01099	27.7726	1.09844e-17
	0.01091	27.9331	1.08972e-17
	0.01082	28.0937	1.081e-17
	0.01073	28.2542	1.07228e-17
	0.01064	28.4147	1.06357e-17
	0.01056	28.5753	1.05485e-17
	0.01047	28.7358	1.04613e-17
	0.01038	28.8963	1.03741e-17
	0.0103	29.0569	1.0287e-17
	0.01021	29.2174	1.01998e-17
	0.01012	29.3779	1.01126e-17
	0.01003	29.5385	1.00254e-17
	0.00995	29.699	9.93825e-18
	0.00986	29.8595	9.85107e-18
	0.00977	30.0201	9.76389e-18
	0.00968	30.1806	9.67671e-18
	0.0096	30.3411	9.58954e-18
	0.00951	30.5017	9.50236e-18
	0.00942	30.6622	9.41518e-18
	0.00934	30.8227	9.328e-18
	0.00925	30.9833	9.24083e-18
	0.00916	31.1438	9.15365e-18
	0.00907	31.3043	9.06647e-18
[truncated: 88,004 more rows]

## Sheet: Fig. 2B
	Theoretical results										Experimental data
	ϕZ=0%		Glucose		G6P		Lactose		Mannitol		Glucose		G6P		Lactose		Mannitol
	Obtained from analytical results combining Eqs. S57 and S160		Obtained from analytical results combining Eqs. S58 and S160								Reference: Nature 528, 99-104 (2015)
	Growth rate (1/h)	Jacetate (mM /OD600/h)	Growth rate (1/h)	Jacetate (mM /OD600/h)	Growth rate (1/h)	Jacetate (mM /OD600/h)	Growth rate (1/h)	Jacetate (mM /OD600/h)	Growth rate (1/h)	Jacetate (mM /OD600/h)	Growth rate (1/h)	Jacetate (mM /OD600/h)	Growth rate (1/h)	Jacetate (mM /OD600/h)	Growth rate (1/h)	Jacetate (mM /OD600/h)	Growth rate (1/h)	Jacetate (mM /OD600/h)
	0	0	0	0	0	0	0	0	0	0	0.89	1.54	0.93	3.02	0.8	0.69	0.73	0.66
	0.01313	5.24833e-18	0.00919	0.01535	0.01081	0.03552	0.00864	0.00864	0.00843	0.0067	0.81	1.3	0.82	3.04	0.65	0.64	0.57	0.47
	0.02626	2.62416e-17	0.01838	0.0307	0.02162	0.07104	0.01727	0.01729	0.01687	0.0134	0.72	1.25	0.7	2.37	0.55	0.59	0.35	0.23
	0.03939	1.10215e-16	0.02758	0.04605	0.03242	0.10656	0.02591	0.02593	0.0253	0.0201	0.69	1.38	0.64	2.26	0.47	0.52	0.21	0.08
	0.05253	3.67383e-16	0.03677	0.06141	0.04323	0.14208	0.03455	0.03457	0.03374	0.0268	0.53	1.02	0.53	2.05	0.39	0.57	0.16	0.05
	0.06566	1.19399e-15	0.04596	0.07676	0.05404	0.1776	0.04318	0.04322	0.04217	0.0335	0.44	0.91	0.48	1.83	0.8	0.67	0.85	0.82
	0.07879	3.6056e-15	0.05515	0.09211	0.06485	0.21312	0.05182	0.05186	0.05061	0.0402	0.88	1.34	1.03	2.77	0.75	0.69	0.81	0.85
	0.09192	1.05072e-14	0.06434	0.10746	0.07566	0.24863	0.06045	0.0605	0.05904	0.0469	0.76	1.37	0.99	2.91	0.67	0.69	0.76	0.74
	0.10505	2.95376e-14	0.07354	0.12281	0.08646	0.28415	0.06909	0.06915	0.06747	0.0536	0.6	0.94	0.94	2.84	0.6	0.49	0.7	0.57
	0.11818	8.063e-14	0.08273	0.13816	0.09727	0.31967	0.07773	0.07779	0.07591	0.0603	0.43	0.79	0.88	2.9	0.53	0.51	0.64	0.59
	0.13131	2.1442e-13	0.09192	0.15351	0.10808	0.35519	0.08636	0.08644	0.08434	0.067	0.26	0.62	0.84	2.53	0.48	0.38	0.6	0.5
	0.14444	5.56735e-13	0.10111	0.16886	0.11889	0.39071	0.095	0.09508	0.09278	0.0737	0.23	0.4	0.78	2.39	0.85	0.93
	0.15758	1.4138e-12	0.1103	0.18422	0.1297	0.42623	0.10364	0.10372	0.10121	0.0804	0.9	1.56	1.06	3.54
	0.17071	3.51614e-12	0.11949	0.19957	0.14051	0.46175	0.11227	0.11237	0.10965	0.08711	0.85	1.49	1	3.36
	0.18384	8.57328e-12	0.12869	0.21492	0.15131	0.49727	0.12091	0.12101	0.11808	0.09381	0.8	1	0.96	3.17
	0.19697	2.05108e-11	0.13788	0.23027	0.16212	0.53279	0.12955	0.12965	0.12652	0.10051	0.72	1.06	0.92	2.98
	0.2101	4.81799e-11	0.14707	0.24562	0.17293	0.56831	0.13818	0.1383	0.13495	0.10721	0.66	1.02	0.9	3
	0.22323	1.11183e-10	0.15626	0.26097	0.18374	0.60383	0.14682	0.14694	0.14338	0.11391	0.62	0.95	0.86	2.96
	0.23636	2.52169e-10	0.16545	0.27632	0.19455	0.63935	0.15545	0.15558	0.15182	0.12061
	0.24949	5.62343e-10	0.17465	0.29167	0.20535	0.67487	0.16409	0.16423	0.16025	0.12731
	0.26263	1.2334e-09	0.18384	0.30703	0.21616	0.71039	0.17273	0.17287	0.16869	0.13401
	0.27576	2.66151e-09	0.19303	0.32238	0.22697	0.7459	0.18136	0.18151	0.17712	0.14071
	0.28889	5.65164e-09	0.20222	0.33773	0.23778	0.78142	0.19	0.19016	0.18556	0.14741
	0.30202	1.18124e-08	0.21141	0.35308	0.24859	0.81694	0.19864	0.1988	0.19399	0.15411
	0.31515	2.43055e-08	0.22061	0.36843	0.25939	0.85246	0.20727	0.20744	0.20242	0.16081
	0.32828	4.92428e-08	0.2298	0.38378	0.2702	0.88798	0.21591	0.21609	0.21086	0.16751
	0.34141	9.82473e-08	0.23899	0.39913	0.28101	0.9235	0.22455	0.22473	0.21929	0.17421
	0.35455	1.93062e-07	0.24818	0.41449	0.29182	0.95902	0.23318	0.23338	0.22773	0.18091
	0.36768	3.73703e-07	0.25737	0.42984	0.30263	0.99454	0.24182	0.24202	0.23616	0.18761
	0.38081	7.1262e-07	0.26657	0.44519	0.31343	1.03006	0.25045	0.25066	0.2446	0.19431
	0.39394	1.33887e-06	0.27576	0.46054	0.32424	1.06558	0.25909	0.25931	0.25303	0.20101
	0.40707	2.47861e-06	0.28495	0.47589	0.33505	1.1011	0.26773	0.26795	0.26146	0.20771
	0.4202	4.52176e-06	0.29414	0.49124	0.34586	1.13662	0.27636	0.27659	0.2699	0.21441
	0.43333	8.12972e-06	0.30333	0.50659	0.35667	1.17214	0.285	0.28524	0.27833	0.22111
	0.44646	1.44061e-05	0.31253	0.52194	0.36747	1.20766	0.29364	0.29388	0.28677	0.22781
	0.4596	2.51626e-05	0.32172	0.5373	0.37828	1.24317	0.30227	0.30252	0.2952	0.23451
	0.47273	4.33246e-05	0.33091	0.55265	0.38909	1.27869	0.31091	0.31117	0.30364	0.24121
	0.48586	7.35386e-05	0.3401	0.568	0.3999	1.31421	0.31955	0.31981	0.31207	0.24791
	0.49899	0.000123064	0.34929	0.58335	0.41071	1.34973	0.32818	0.32845	0.32051	0.25461
	0.51212	0.000203052	0.35848	0.5987	0.42152	1.38525	0.33682	0.3371	0.32894	0.26132
	0.52525	0.000330352	0.36768	0.61405	0.43232	1.42077	0.34545	0.34574	0.33737	0.26802
	0.53838	0.000529994	0.37687	0.6294	0.44313	1.45629	0.35409	0.35438	0.34581	0.27472
	0.55152	0.00083853	0.38606	0.64476	0.45394	1.49181	0.36273	0.36303	0.35424	0.28142
	0.56465	0.00131	0.39525	0.66011	0.46475	1.52733	0.37136	0.37167	0.36268	0.28812
	0.57778	0.00201	0.40444	0.67546	0.47556	1.56285	0.38	0.38032	0.37111	0.29482
	0.59091	0.00306	0.41364	0.69081	0.48636	1.59837	0.38864	0.38896	0.37955	0.30152
	0.60404	0.00458	0.42283	0.70616	0.49717	1.63389	0.39727	0.3976	0.38798	0.30822
	0.61717	0.00676	0.43202	0.72151	0.50798	1.66941	0.40591	0.40625	0.39641	0.31492
	0.6303	0.00986	0.44121	0.73686	0.51879	1.70493	0.41455	0.41489	0.40485	0.32162
	0.64343	0.01418	0.4504	0.75221	0.5296	1.74044	0.42318	0.42353	0.41328	0.32832
	0.65657	0.02012	0.4596	0.76757	0.5404	1.77596	0.43182	0.43218	0.42172	0.33502
	0.6697	0.02818	0.46879	0.78292	0.55121	1.81148	0.44045	0.44082	0.43015	0.34172
	0.68283	0.03895	0.47798	0.79827	0.56202	1.847	0.44909	0.44946	0.43859	0.34842
	0.69596	0.05314	0.48717	0.81362	0.57283	1.88252	0.45773	0.45811	0.44702	0.35512
	0.70909	0.07158	0.49636	0.82897	0.58364	1.91804	0.46636	0.46675	0.45545	0.36182
	0.72222	0.09518	0.50556	0.84432	0.59444	1.95356	0.475	0.47539	0.46389	0.36852
	0.73535	0.12498	0.51475	0.85967	0.60525	1.98908	0.48364	0.48404	0.47232	0.37522
	0.74848	0.16206	0.52394	0.87502	0.61606	2.0246	0.49227	0.49268	0.48076	0.38192
	0.76162	0.20754	0.53313	0.89038	0.62687	2.06012	0.50091	0.50132	0.48919	0.38862
	0.77475	0.26256	0.54232	0.90573	0.63768	2.09564	0.50955	0.50997	0.49763	0.39532
	0.78788	0.32817	0.55152	0.92108	0.64848	2.13116	0.51818	0.51861	0.50606	0.40202
	0.80101	0.40532	0.56071	0.93643	0.65929	2.16668	0.52682	0.52726	0.51449	0.40872
	0.81414	0.49478	0.5699	0.95178	0.6701	2.20219	0.53545	0.5359	0.52293	0.41542
	0.82727	0.59706	0.57909	0.96713	0.68091	2.23771	0.54409	0.54454	0.53136	0.42212
	0.8404	0.71238	0.58828	0.98248	0.69172	2.27323	0.55273	0.55319	0.5398	0.42882
	0.85354	0.84062	0.59747	0.99784	0.70253	2.30875	0.56136	0.56183	0.54823	0.43553
	0.86667	0.98129	0.60667	1.01319	0.71333	2.34427	0.57	0.57047	0.55667	0.44223
	0.8798	1.13348	0.61586	1.02854	0.72414	2.37979	0.57864	0.57912	0.5651	0.44893
	0.89293	1.29594	0.62505	1.04389	0.73495	2.41531	0.58727	0.58776	0.57354	0.45563
	0.90606	1.46704	0.63424	1.05924	0.74576	2.45083	0.59591	0.5964	0.58197	0.46233
	0.91919	1.64488	0.64343	1.07459	0.75657	2.48635	0.60455	0.60505	0.5904	0.46903
	0.93232	1.82734	0.65263	1.08994	0.76737	2.52187	0.61318	0.61369	0.59884	0.47573
	0.94545	2.01214	0.66182	1.10529	0.77818	2.55739	0.62182	0.62233	0.60727	0.48243
	0.95859	2.19701	0.67101	1.12065	0.78899	2.59291	0.63045	0.63098	0.61571	0.48913
	0.97172	2.37971	0.6802	1.136	0.7998	2.62843	0.63909	0.63962	0.62414	0.49583
	0.98485	2.55816	0.68939	1.15135	0.81061	2.66395	0.64773	0.64827	0.63258	0.50253
	0.99798	2.73051	0.69859	1.1667	0.82141	2.69946	0.65636	0.65691	0.64101	0.50923
	1.01111	2.89523	0.70778	1.18205	0.83222	2.73498	0.665	0.66555	0.64944	0.51593
	1.02424	3.05112	0.71697	1.1974	0.84303	2.7705	0.67364	0.6742	0.65788	0.52263
	1.03737	3.19732	0.72616	1.21275	0.85384	2.80602	0.68227	0.68284	0.66631	0.52933
	1.05051	3.33337	0.73535	1.2281	0.86465	2.84154	0.69091	0.69148	0.67475	0.53603
	1.06364	3.45912	0.74455	1.24346	0.87545	2.87706	0.69955	0.70013	0.68318	0.54273
	1.07677	3.57477	0.75374	1.25881	0.88626	2.91258	0.70818	0.70877	0.69162	0.54943
	1.0899	3.68073	0.76293	1.27416	0.89707	2.9481	0.71682	0.71741	0.70005	0.55613
	1.10303	3.77764	0.77212	1.28951	0.90788	2.98362	0.72545	0.72606	0.70848	0.56283
	1.11616	3.8663	0.78131	1.30486	0.91869	3.01914	0.73409	0.7347	0.71692	0.56953
	1.12929	3.94758	0.79051	1.32021	0.92949	3.05466	0.74273	0.74334	0.72535	0.57623
	1.14242	4.02238	0.7997	1.33556	0.9403	3.09018	0.75136	0.75199	0.73379	0.58293
	1.15556	4.09163	0.80889	1.35092	0.95111	3.1257	0.76	0.76063	0.74222	0.58963
	1.16869	4.15619	0.81808	1.36627	0.96192	3.16122	0.76864	0.76927	0.75066	0.59633
	1.18182	4.21686	0.82727	1.38162	0.97273	3.19673	0.77727	0.77792	0.75909	0.60303
	1.19495	4.27438	0.83646	1.39697	0.98354	3.23225	0.78591	0.78656	0.76753	0.60974
	1.20808	4.32937	0.84566	1.41232	0.99434	3.26777	0.79455	0.79521	0.77596	0.61644
	1.22121	4.38237	0.85485	1.42767	1.00515	3.30329	0.80318	0.80385	0.78439	0.62314
	1.23434	4.43384	0.86404	1.44302	1.01596	3.33881	0.81182	0.81249	0.79283	0.62984
	1.24747	4.48414	0.87323	1.45837	1.02677	3.37433	0.82045	0.82114	0.80126	0.63654
	1.26061	4.53357	0.88242	1.47373	1.03758	3.40985	0.82909	0.82978	0.8097	0.64324
	1.27374	4.58235	0.89162	1.48908	1.04838	3.44537	0.83773	0.83842	0.81813	0.64994
	1.28687	4.63067	0.90081	1.50443	1.05919	3.48089	0.84636	0.84707	0.82657	0.65664
	1.3	4.67865	0.91	1.51978	1.07	3.51641	0.855	0.85571	0.835	0.66334

## Sheet: Fig. 2C
	Theoretical results						Experimental data
	ϕZ=0%		ϕZ=8%		ϕZ=16%		ϕZ=0%		ϕZ=8%		ϕZ=16%
	Obtained from analytical results combining Eqs. S57 and S160						Reference: Nature 528, 99-104 (2015)
	Growth rate (1/h)	Jacetate (mM /OD600/h)	Growth rate (1/h)	Jacetate (mM /OD600/h)	Growth rate (1/h)	Jacetate (mM /OD600/h)	Growth rate (1/h)	Jacetate (mM /OD600/h)	Growth rate (1/h)	Jacetate (mM /OD600/h)	Growth rate (1/h)	Jacetate (mM /OD600/h)
	0	0	0	0	0	0	1.14	4.07	0.93	3.01	0.72	2.35
	0.01313	5.24833e-18	0.01094	4.37361e-18	0.00875	3.49888e-18	1.01	2.32	0.8	1.33	0.61	1.02
	0.02626	2.62416e-17	0.02189	2.1868e-17	0.01751	1.74944e-17	1.03	2.84	0.7	0.68	0.55	0.53
	0.03939	1.10215e-16	0.03283	9.18457e-17	0.02626	7.34766e-17	0.93	1.44	0.73	0.7	0.51	0.43
	0.05253	3.67383e-16	0.04377	3.06152e-16	0.03502	2.44922e-16
	0.06566	1.19399e-15	0.05471	9.94995e-16	0.04377	7.95996e-16
	0.07879	3.6056e-15	0.06566	3.00467e-15	0.05253	2.40373e-15
	0.09192	1.05072e-14	0.0766	8.75596e-15	0.06128	7.00477e-15
	0.10505	2.95376e-14	0.08754	2.46147e-14	0.07003	1.96917e-14
	0.11818	8.063e-14	0.09848	6.71917e-14	0.07879	5.37534e-14
	0.13131	2.1442e-13	0.10943	1.78684e-13	0.08754	1.42947e-13
	0.14444	5.56735e-13	0.12037	4.63946e-13	0.0963	3.71156e-13
	0.15758	1.4138e-12	0.13131	1.17817e-12	0.10505	9.42537e-13
	0.17071	3.51614e-12	0.14226	2.93012e-12	0.1138	2.3441e-12
	0.18384	8.57328e-12	0.1532	7.1444e-12	0.12256	5.71552e-12
	0.19697	2.05108e-11	0.16414	1.70923e-11	0.13131	1.36739e-11
	0.2101	4.81799e-11	0.17508	4.01499e-11	0.14007	3.212e-11
	0.22323	1.11183e-10	0.18603	9.26521e-11	0.14882	7.41217e-11
	0.23636	2.52169e-10	0.19697	2.10141e-10	0.15758	1.68113e-10
	0.24949	5.62343e-10	0.20791	4.68619e-10	0.16633	3.74895e-10
	0.26263	1.2334e-09	0.21886	1.02784e-09	0.17508	8.22269e-10
	0.27576	2.66151e-09	0.2298	2.21792e-09	0.18384	1.77434e-09
	0.28889	5.65164e-09	0.24074	4.7097e-09	0.19259	3.76776e-09
	0.30202	1.18124e-08	0.25168	9.84369e-09	0.20135	7.87495e-09
	0.31515	2.43055e-08	0.26263	2.02546e-08	0.2101	1.62037e-08
	0.32828	4.92428e-08	0.27357	4.10357e-08	0.21886	3.28285e-08
	0.34141	9.82473e-08	0.28451	8.18727e-08	0.22761	6.54982e-08
	0.35455	1.93062e-07	0.29545	1.60885e-07	0.23636	1.28708e-07
	0.36768	3.73703e-07	0.3064	3.11419e-07	0.24512	2.49135e-07
	0.38081	7.1262e-07	0.31734	5.9385e-07	0.25387	4.7508e-07
	0.39394	1.33887e-06	0.32828	1.11572e-06	0.26263	8.92578e-07
	0.40707	2.47861e-06	0.33923	2.0655e-06	0.27138	1.6524e-06
	0.4202	4.52176e-06	0.35017	3.76814e-06	0.28013	3.01451e-06
	0.43333	8.12972e-06	0.36111	6.77477e-06	0.28889	5.41982e-06
	0.44646	1.44061e-05	0.37205	1.20051e-05	0.29764	9.60408e-06
	0.4596	2.51626e-05	0.383	2.09689e-05	0.3064	1.67751e-05
	0.47273	4.33246e-05	0.39394	3.61039e-05	0.31515	2.88831e-05
	0.48586	7.35386e-05	0.40488	6.12822e-05	0.32391	4.90258e-05
	0.49899	0.000123064	0.41582	0.000102553	0.33266	8.20423e-05
	0.51212	0.000203052	0.42677	0.00016921	0.34141	0.000135368
	0.52525	0.000330352	0.43771	0.000275293	0.35017	0.000220235
	0.53838	0.000529994	0.44865	0.000441662	0.35892	0.000353329
	0.55152	0.00083853	0.4596	0.000698775	0.36768	0.00055902
	0.56465	0.00131	0.47054	0.00109	0.37643	0.000872286
	0.57778	0.00201	0.48148	0.00168	0.38519	0.00134
	0.59091	0.00306	0.49242	0.00255	0.39394	0.00204
	0.60404	0.00458	0.50337	0.00381	0.40269	0.00305
	0.61717	0.00676	0.51431	0.00564	0.41145	0.00451
	0.6303	0.00986	0.52525	0.00821	0.4202	0.00657
	0.64343	0.01418	0.5362	0.01181	0.42896	0.00945
	0.65657	0.02012	0.54714	0.01677	0.43771	0.01341
	0.6697	0.02818	0.55808	0.02348	0.44646	0.01879
	0.68283	0.03895	0.56902	0.03246	0.45522	0.02597
	0.69596	0.05314	0.57997	0.04429	0.46397	0.03543
	0.70909	0.07158	0.59091	0.05965	0.47273	0.04772
	0.72222	0.09518	0.60185	0.07932	0.48148	0.06346
	0.73535	0.12498	0.61279	0.10415	0.49024	0.08332
	0.74848	0.16206	0.62374	0.13505	0.49899	0.10804
	0.76162	0.20754	0.63468	0.17295	0.50774	0.13836
	0.77475	0.26256	0.64562	0.2188	0.5165	0.17504
	0.78788	0.32817	0.65657	0.27348	0.52525	0.21878
	0.80101	0.40532	0.66751	0.33777	0.53401	0.27022
	0.81414	0.49478	0.67845	0.41231	0.54276	0.32985
	0.82727	0.59706	0.68939	0.49755	0.55152	0.39804
	0.8404	0.71238	0.70034	0.59365	0.56027	0.47492
	0.85354	0.84062	0.71128	0.70052	0.56902	0.56042
	0.86667	0.98129	0.72222	0.81774	0.57778	0.65419
	0.8798	1.13348	0.73316	0.94457	0.58653	0.75566
	0.89293	1.29594	0.74411	1.07995	0.59529	0.86396
	0.90606	1.46704	0.75505	1.22253	0.60404	0.97803
	0.91919	1.64488	0.76599	1.37074	0.61279	1.09659
	0.93232	1.82734	0.77694	1.52278	0.62155	1.21822
	0.94545	2.01214	0.78788	1.67679	0.6303	1.34143
	0.95859	2.19701	0.79882	1.83084	0.63906	1.46467
	0.97172	2.37971	0.80976	1.98309	0.64781	1.58647
	0.98485	2.55816	0.82071	2.1318	0.65657	1.70544
	0.99798	2.73051	0.83165	2.27543	0.66532	1.82034
	1.01111	2.89523	0.84259	2.4127	0.67407	1.93016
	1.02424	3.05112	0.85354	2.5426	0.68283	2.03408
	1.03737	3.19732	0.86448	2.66443	0.69158	2.13155
	1.05051	3.33337	0.87542	2.77781	0.70034	2.22224
	1.06364	3.45912	0.88636	2.8826	0.70909	2.30608
	1.07677	3.57477	0.89731	2.97897	0.71785	2.38318
	1.0899	3.68073	0.90825	3.06727	0.7266	2.45382
	1.10303	3.77764	0.91919	3.14804	0.73535	2.51843
	1.11616	3.8663	0.93013	3.22192	0.74411	2.57753
	1.12929	3.94758	0.94108	3.28965	0.75286	2.63172
	1.14242	4.02238	0.95202	3.35198	0.76162	2.68159
	1.15556	4.09163	0.96296	3.40969	0.77037	2.72775
	1.16869	4.15619	0.97391	3.46349	0.77912	2.77079
	1.18182	4.21686	0.98485	3.51405	0.78788	2.81124
	1.19495	4.27438	0.99579	3.56198	0.79663	2.84959
	1.20808	4.32937	1.00673	3.60781	0.80539	2.88625
	1.22121	4.38237	1.01768	3.65198	0.81414	2.92158
	1.23434	4.43384	1.02862	3.69487	0.8229	2.95589
	1.24747	4.48414	1.03956	3.73678	0.83165	2.98943
	1.26061	4.53357	1.05051	3.77797	0.8404	3.02238
	1.27374	4.58235	1.06145	3.81862	0.84916	3.0549
	1.28687	4.63067	1.07239	3.85889	0.85791	3.08711
	1.3	4.67865	1.08333	3.89887	0.86667	3.1191

## Sheet: Fig. 3A
	Theoretical results			Experimental data
				w=0			w=32*
	Obtained from analytical results combining Eqs. S70 and S160			Reference: Nature 528, 99-104 (2015)
	Growth rate (1/h)	w (1/h)	Jacetate (mM /OD600/h)	Growth rate (1/h)	w (1/h)	Jacetate† (mM /OD600/h)	Growth rate (1/h)	w* (1/h)	Jacetate† (mM /OD600/h)
	0	0	0	0.52	0	-0.08	0.49	32	0.75
	0	0.13378	2.47541e-18	0.66	0	0.01	0.56	32	1.84
	0	0.26756	4.95083e-18	0.7	0	-0.05	0.63	32	2.21
	0	0.40134	7.42624e-18	0.77	0	0.6	0.67	32	2.68
	0	0.53512	9.90165e-18	0.87	0	1.49	0.66	32	2.89
	0	0.6689	1.23771e-17	0.94	0	1.95
	0	0.80268	1.48525e-17
	0	0.93645	1.73279e-17
	0	1.07023	1.98033e-17				* This value of the energy dissipation coefficient was fitted from experimental data
	0	1.20401	2.22787e-17
	0	1.33779	2.47541e-17
	0	1.47157	2.72296e-17
	0	1.60535	2.9705e-17
	0	1.73913	3.21804e-17				† Engauge Digitizer 11.1 was used to extract the experimental data from the plots of the reference study.
	0	1.87291	3.46558e-17
	0	2.00669	3.71312e-17
	0	2.14047	3.96066e-17
	0	2.27425	4.2082e-17
	0	2.40803	4.45574e-17
	0	2.54181	4.70329e-17
	0	2.67559	4.95083e-17
	0	2.80936	5.19837e-17
	0	2.94314	5.44591e-17
	0	3.07692	5.69345e-17
	0	3.2107	5.94099e-17
	0	3.34448	6.18853e-17
	0	3.47826	6.43608e-17
	0	3.61204	6.68362e-17
	0	3.74582	6.93116e-17
	0	3.8796	7.1787e-17
	0	4.01338	7.42624e-17
	0	4.14716	7.67378e-17
	0	4.28094	7.92132e-17
	0	4.41472	8.16887e-17
	0	4.54849	8.41641e-17
	0	4.68227	8.66395e-17
	0	4.81605	8.91149e-17
	0	4.94983	9.15903e-17
	0	5.08361	9.40657e-17
	0	5.21739	9.65411e-17
	0	5.35117	9.90165e-17
	0	5.48495	1.01492e-16
	0	5.61873	1.03967e-16
	0	5.75251	1.06443e-16
	0	5.88629	1.08918e-16
	0	6.02007	1.11394e-16
	0	6.15385	1.13869e-16
	0	6.28763	1.16344e-16
	0	6.4214	1.1882e-16
	0	6.55518	1.21295e-16
	0	6.68896	1.23771e-16
	0	6.82274	1.26246e-16
	0	6.95652	1.28722e-16
	0	7.0903	1.31197e-16
	0	7.22408	1.33672e-16
	0	7.35786	1.36148e-16
	0	7.49164	1.38623e-16
	0	7.62542	1.41099e-16
	0	7.7592	1.43574e-16
	0	7.89298	1.46049e-16
	0	8.02676	1.48525e-16
	0	8.16054	1.51e-16
	0	8.29431	1.53476e-16
	0	8.42809	1.55951e-16
	0	8.56187	1.58426e-16
	0	8.69565	1.60902e-16
	0	8.82943	1.63377e-16
	0	8.96321	1.65853e-16
	0	9.09699	1.68328e-16
	0	9.23077	1.70804e-16
	0	9.36455	1.73279e-16
	0	9.49833	1.75754e-16
	0	9.63211	1.7823e-16
	0	9.76589	1.80705e-16
	0	9.89967	1.83181e-16
	0	10.0334	1.85656e-16
	0	10.1672	1.88131e-16
	0	10.301	1.90607e-16
	0	10.4348	1.93082e-16
	0	10.5686	1.95558e-16
	0	10.7023	1.98033e-16
	0	10.8361	2.00509e-16
	0	10.9699	2.02984e-16
	0	11.1037	2.05459e-16
	0	11.2375	2.07935e-16
	0	11.3712	2.1041e-16
	0	11.505	2.12886e-16
	0	11.6388	2.15361e-16
	0	11.7726	2.17836e-16
	0	11.9063	2.20312e-16
	0	12.0401	2.22787e-16
	0	12.1739	2.25263e-16
	0	12.3077	2.27738e-16
	0	12.4415	2.30213e-16
	0	12.5753	2.32689e-16
	0	12.709	2.35164e-16
	0	12.8428	2.3764e-16
	0	12.9766	2.40115e-16
	0	13.1104	2.42591e-16
	0	13.2441	2.45066e-16
	0	13.3779	2.47541e-16
	0	13.5117	2.50017e-16
	0	13.6455	2.52492e-16
	0	13.7793	2.54968e-16
	0	13.913	2.57443e-16
	0	14.0468	2.59918e-16
	0	14.1806	2.62394e-16
	0	14.3144	2.64869e-16
	0	14.4482	2.67345e-16
	0	14.5819	2.6982e-16
	0	14.7157	2.72296e-16
	0	14.8495	2.74771e-16
	0	14.9833	2.77246e-16
	0	15.1171	2.79722e-16
	0	15.2508	2.82197e-16
	0	15.3846	2.84673e-16
	0	15.5184	2.87148e-16
	0	15.6522	2.89623e-16
	0	15.7859	2.92099e-16
	0	15.9197	2.94574e-16
	0	16.0535	2.9705e-16
	0	16.1873	2.99525e-16
	0	16.3211	3.02e-16
	0	16.4549	3.04476e-16
	0	16.5886	3.06951e-16
	0	16.7224	3.09427e-16
	0	16.8562	3.11902e-16
	0	16.99	3.14378e-16
	0	17.1238	3.16853e-16
	0	17.2575	3.19328e-16
	0	17.3913	3.21804e-16
	0	17.5251	3.24279e-16
	0	17.6589	3.26755e-16
	0	17.7926	3.2923e-16
	0	17.9264	3.31705e-16
	0	18.0602	3.34181e-16
	0	18.194	3.36656e-16
	0	18.3278	3.39132e-16
	0	18.4615	3.41607e-16
	0	18.5953	3.44082e-16
	0	18.7291	3.46558e-16
	0	18.8629	3.49033e-16
	0	18.9967	3.51509e-16
	0	19.1304	3.53984e-16
	0	19.2642	3.5646e-16
	0	19.398	3.58935e-16
	0	19.5318	3.6141e-16
	0	19.6655	3.63886e-16
	0	19.7993	3.66361e-16
	0	19.9331	3.68837e-16
	0	20.0669	3.71312e-16
	0	20.2007	3.73787e-16
	0	20.3345	3.76263e-16
	0	20.4682	3.78738e-16
	0	20.602	3.81214e-16
	0	20.7358	3.83689e-16
	0	20.8696	3.86165e-16
	0	21.0033	3.8864e-16
	0	21.1371	3.91115e-16
	0	21.2709	3.93591e-16
	0	21.4047	3.96066e-16
	0	21.5385	3.98542e-16
	0	21.6722	4.01017e-16
	0	21.806	4.03492e-16
	0	21.9398	4.05968e-16
	0	22.0736	4.08443e-16
	0	22.2074	4.10919e-16
	0	22.3411	4.13394e-16
	0	22.4749	4.15869e-16
	0	22.6087	4.18345e-16
	0	22.7425	4.2082e-16
	0	22.8762	4.23296e-16
	0	23.01	4.25771e-16
	0	23.1438	4.28247e-16
	0	23.2776	4.30722e-16
	0	23.4114	4.33197e-16
	0	23.5451	4.35673e-16
	0	23.6789	4.38148e-16
	0	23.8127	4.40624e-16
	0	23.9465	4.43099e-16
	0	24.0803	4.45574e-16
	0	24.2141	4.4805e-16
	0	24.3478	4.50525e-16
	0	24.4816	4.53001e-16
	0	24.6154	4.55476e-16
	0	24.7492	4.57952e-16
	0	24.8829	4.60427e-16
	0	25.0167	4.62902e-16
	0	25.1505	4.65378e-16
	0	25.2843	4.67853e-16
	0	25.4181	4.70329e-16
	0	25.5518	4.72804e-16
	0	25.6856	4.75279e-16
	0	25.8194	4.77755e-16
	0	25.9532	4.8023e-16
	0	26.087	4.82706e-16
	0	26.2207	4.85181e-16
	0	26.3545	4.87656e-16
	0	26.4883	4.90132e-16
	0	26.6221	4.92607e-16
	0	26.7558	4.95083e-16
	0	26.8896	4.97558e-16
	0	27.0234	5.00034e-16
	0	27.1572	5.02509e-16
	0	27.291	5.04984e-16
	0	27.4247	5.0746e-16
	0	27.5585	5.09935e-16
	0	27.6923	5.12411e-16
	0	27.8261	5.14886e-16
	0	27.9599	5.17361e-16
	0	28.0937	5.19837e-16
	0	28.2274	5.22312e-16
	0	28.3612	5.24788e-16
	0	28.495	5.27263e-16
	0	28.6288	5.29739e-16
	0	28.7625	5.32214e-16
	0	28.8963	5.34689e-16
	0	29.0301	5.37165e-16
	0	29.1639	5.3964e-16
	0	29.2977	5.42116e-16
	0	29.4314	5.44591e-16
	0	29.5652	5.47066e-16
	0	29.699	5.49542e-16
	0	29.8328	5.52017e-16
	0	29.9666	5.54493e-16
	0	30.1003	5.56968e-16
	0	30.2341	5.59443e-16
	0	30.3679	5.61919e-16
	0	30.5017	5.64394e-16
	0	30.6354	5.6687e-16
	0	30.7692	5.69345e-16
	0	30.903	5.71821e-16
	0	31.0368	5.74296e-16
	0	31.1706	5.76771e-16
	0	31.3043	5.79247e-16
	0	31.4381	5.81722e-16
	0	31.5719	5.84198e-16
	0	31.7057	5.86673e-16
	0	31.8395	5.89148e-16
	0	31.9732	5.91624e-16
	0	32.107	5.94099e-16
	0	32.2408	5.96575e-16
	0	32.3746	5.9905e-16
	0	32.5084	6.01526e-16
	0	32.6421	6.04001e-16
	0	32.7759	6.06476e-16
	0	32.9097	6.08952e-16
	0	33.0435	6.11427e-16
	0	33.1773	6.13903e-16
	0	33.311	6.16378e-16
	0	33.4448	6.18853e-16
	0	33.5786	6.21329e-16
	0	33.7124	6.23804e-16
	0	33.8462	6.2628e-16
	0	33.9799	6.28755e-16
	0	34.1137	6.3123e-16
	0	34.2475	6.33706e-16
	0	34.3813	6.36181e-16
	0	34.5151	6.38657e-16
	0	34.6488	6.41132e-16
	0	34.7826	6.43608e-16
	0	34.9164	6.46083e-16
	0	35.0502	6.48558e-16
	0	35.184	6.51034e-16
	0	35.3177	6.53509e-16
	0	35.4515	6.55985e-16
	0	35.5853	6.5846e-16
	0	35.7191	6.60935e-16
	0	35.8528	6.63411e-16
	0	35.9866	6.65886e-16
	0	36.1204	6.68362e-16
	0	36.2542	6.70837e-16
	0	36.388	6.73313e-16
	0	36.5217	6.75788e-16
	0	36.6555	6.78263e-16
	0	36.7893	6.80739e-16
	0	36.9231	6.83214e-16
	0	37.0569	6.8569e-16
	0	37.1906	6.88165e-16
	0	37.3244	6.9064e-16
	0	37.4582	6.93116e-16
	0	37.592	6.95591e-16
	0	37.7257	6.98067e-16
	0	37.8595	7.00542e-16
	0	37.9933	7.03017e-16
	0	38.1271	7.05493e-16
	0	38.2609	7.07968e-16
	0	38.3946	7.10444e-16
	0	38.5284	7.12919e-16
	0	38.6622	7.15395e-16
	0	38.796	7.1787e-16
	0	38.9298	7.20345e-16
	0	39.0635	7.22821e-16
	0	39.1973	7.25296e-16
	0	39.3311	7.27772e-16
	0	39.4649	7.30247e-16
	0	39.5987	7.32722e-16
	0	39.7324	7.35198e-16
	0	39.8662	7.37673e-16
	0	40	7.40149e-16
	0.00326	0	6.51108e-19
	0.00326	0.13378	3.12627e-18
	0.00326	0.26756	5.60144e-18
	0.00325	0.40134	8.0766e-18
	0.00325	0.53512	1.05518e-17
	0.00325	0.6689	1.30269e-17
	0.00325	0.80268	1.55021e-17
	0.00325	0.93645	1.79773e-17
	0.00325	1.07023	2.04524e-17
	0.00325	1.20401	2.29276e-17
	0.00325	1.33779	2.54028e-17
	0.00324	1.47157	2.78779e-17
	0.00324	1.60535	3.03531e-17
	0.00324	1.73913	3.28283e-17
	0.00324	1.87291	3.53034e-17
	0.00324	2.00669	3.77786e-17
	0.00324	2.14047	4.02537e-17
	0.00324	2.27425	4.27289e-17
	0.00324	2.40803	4.52041e-17
	0.00323	2.54181	4.76792e-17
	0.00323	2.67559	5.01544e-17
	0.00323	2.80936	5.26296e-17
	0.00323	2.94314	5.51047e-17
	0.00323	3.07692	5.75799e-17
	0.00323	3.2107	6.00551e-17
	0.00323	3.34448	6.25302e-17
	0.00323	3.47826	6.50054e-17
	0.00322	3.61204	6.74806e-17
	0.00322	3.74582	6.99557e-17
	0.00322	3.8796	7.24309e-17
	0.00322	4.01338	7.49061e-17
	0.00322	4.14716	7.73812e-17
	0.00322	4.28094	7.98564e-17
	0.00322	4.41472	8.23315e-17
	0.00322	4.54849	8.48067e-17
	0.00321	4.68227	8.72819e-17
	0.00321	4.81605	8.9757e-17
	0.00321	4.94983	9.22322e-17
	0.00321	5.08361	9.47074e-17
	0.00321	5.21739	9.71825e-17
	0.00321	5.35117	9.96577e-17
	0.00321	5.48495	1.02133e-16
	0.00321	5.61873	1.04608e-16
	0.0032	5.75251	1.07083e-16
	0.0032	5.88629	1.09558e-16
	0.0032	6.02007	1.12034e-16
	0.0032	6.15385	1.14509e-16
	0.0032	6.28763	1.16984e-16
	0.0032	6.4214	1.19459e-16
	0.0032	6.55518	1.21934e-16
	0.0032	6.68896	1.24409e-16
	0.00319	6.82274	1.26885e-16
	0.00319	6.95652	1.2936e-16
	0.00319	7.0903	1.31835e-16
	0.00319	7.22408	1.3431e-16
	0.00319	7.35786	1.36785e-16
	0.00319	7.49164	1.3926e-16
	0.00319	7.62542	1.41736e-16
	0.00319	7.7592	1.44211e-16
	0.00318	7.89298	1.46686e-16
	0.00318	8.02676	1.49161e-16
	0.00318	8.16054	1.51636e-16
	0.00318	8.29431	1.54111e-16
	0.00318	8.42809	1.56586e-16
	0.00318	8.56187	1.59062e-16
	0.00318	8.69565	1.61537e-16
	0.00318	8.82943	1.64012e-16
	0.00317	8.96321	1.66487e-16
	0.00317	9.09699	1.68962e-16
	0.00317	9.23077	1.71437e-16
	0.00317	9.36455	1.73913e-16
	0.00317	9.49833	1.76388e-16
	0.00317	9.63211	1.78863e-16
	0.00317	9.76589	1.81338e-16
	0.00317	9.89967	1.83813e-16
	0.00316	10.0334	1.86288e-16
	0.00316	10.1672	1.88764e-16
	0.00316	10.301	1.91239e-16
	0.00316	10.4348	1.93714e-16
	0.00316	10.5686	1.96189e-16
	0.00316	10.7023	1.98664e-16
	0.00316	10.8361	2.01139e-16
	0.00316	10.9699	2.03615e-16
	0.00315	11.1037	2.0609e-16
	0.00315	11.2375	2.08565e-16
	0.00315	11.3712	2.1104e-16
	0.00315	11.505	2.13515e-16
	0.00315	11.6388	2.1599e-16
	0.00315	11.7726	2.18466e-16
	0.00315	11.9063	2.20941e-16
	0.00315	12.0401	2.23416e-16
	0.00314	12.1739	2.25891e-16
	0.00314	12.3077	2.28366e-16
	0.00314	12.4415	2.30841e-16
	0.00314	12.5753	2.33317e-16
	0.00314	12.709	2.35792e-16
	0.00314	12.8428	2.38267e-16
	0.00314	12.9766	2.40742e-16
	0.00314	13.1104	2.43217e-16
	0.00313	13.2441	2.45692e-16
	0.00313	13.3779	2.48168e-16
	0.00313	13.5117	2.50643e-16
	0.00313	13.6455	2.53118e-16
	0.00313	13.7793	2.55593e-16
	0.00313	13.913	2.58068e-16
	0.00313	14.0468	2.60543e-16
	0.00313	14.1806	2.63019e-16
	0.00312	14.3144	2.65494e-16
	0.00312	14.4482	2.67969e-16
	0.00312	14.5819	2.70444e-16
	0.00312	14.7157	2.72919e-16
	0.00312	14.8495	2.75394e-16
	0.00312	14.9833	2.7787e-16
	0.00312	15.1171	2.80345e-16
	0.00312	15.2508	2.8282e-16
	0.00311	15.3846	2.85295e-16
	0.00311	15.5184	2.8777e-16
	0.00311	15.6522	2.90245e-16
	0.00311	15.7859	2.92721e-16
	0.00311	15.9197	2.95196e-16
	0.00311	16.0535	2.97671e-16
	0.00311	16.1873	3.00146e-16
	0.00311	16.3211	3.02621e-16
	0.0031	16.4549	3.05096e-16
	0.0031	16.5886	3.07572e-16
	0.0031	16.7224	3.10047e-16
	0.0031	16.8562	3.12522e-16
	0.0031	16.99	3.14997e-16
	0.0031	17.1238	3.17472e-16
	0.0031	17.2575	3.19947e-16
	0.0031	17.3913	3.22423e-16
	0.0031	17.5251	3.24898e-16
	0.00309	17.6589	3.27373e-16
	0.00309	17.7926	3.29848e-16
	0.00309	17.9264	3.32323e-16
	0.00309	18.0602	3.34798e-16
	0.00309	18.194	3.37274e-16
	0.00309	18.3278	3.39749e-16
	0.00309	18.4615	3.42224e-16
	0.00309	18.5953	3.44699e-16
	0.00308	18.7291	3.47174e-16
	0.00308	18.8629	3.49649e-16
	0.00308	18.9967	3.52125e-16
	0.00308	19.1304	3.546e-16
	0.00308	19.2642	3.57075e-16
	0.00308	19.398	3.5955e-16
	0.00308	19.5318	3.62025e-16
	0.00308	19.6655	3.645e-16
	0.00307	19.7993	3.66975e-16
	0.00307	19.9331	3.69451e-16
	0.00307	20.0669	3.71926e-16
	0.00307	20.2007	3.74401e-16
	0.00307	20.3345	3.76876e-16
	0.00307	20.4682	3.79351e-16
	0.00307	20.602	3.81826e-16
	0.00307	20.7358	3.84302e-16
	0.00306	20.8696	3.86777e-16
	0.00306	21.0033	3.89252e-16
	0.00306	21.1371	3.91727e-16
	0.00306	21.2709	3.94202e-16
	0.00306	21.4047	3.96677e-16
	0.00306	21.5385	3.99153e-16
	0.00306	21.6722	4.01628e-16
	0.00306	21.806	4.04103e-16
	0.00305	21.9398	4.06578e-16
	0.00305	22.0736	4.09053e-16
	0.00305	22.2074	4.11528e-16
	0.00305	22.3411	4.14004e-16
	0.00305	22.4749	4.16479e-16
	0.00305	22.6087	4.18954e-16
	0.00305	22.7425	4.21429e-16
	0.00305	22.8762	4.23904e-16
	0.00304	23.01	4.26379e-16
	0.00304	23.1438	4.28855e-16
	0.00304	23.2776	4.3133e-16
	0.00304	23.4114	4.33805e-16
	0.00304	23.5451	4.3628e-16
	0.00304	23.6789	4.38755e-16
	0.00304	23.8127	4.4123e-16
	0.00304	23.9465	4.43706e-16
	0.00303	24.0803	4.46181e-16
	0.00303	24.2141	4.48656e-16
	0.00303	24.3478	4.51131e-16
	0.00303	24.4816	4.53606e-16
	0.00303	24.6154	4.56081e-16
	0.00303	24.7492	4.58557e-16
	0.00303	24.8829	4.61032e-16
	0.00303	25.0167	4.63507e-16
	0.00302	25.1505	4.65982e-16
	0.00302	25.2843	4.68457e-16
	0.00302	25.4181	4.70932e-16
	0.00302	25.5518	4.73408e-16
	0.00302	25.6856	4.75883e-16
	0.00302	25.8194	4.78358e-16
	0.00302	25.9532	4.80833e-16
	0.00302	26.087	4.83308e-16
	0.00301	26.2207	4.85783e-16
	0.00301	26.3545	4.88259e-16
	0.00301	26.4883	4.90734e-16
	0.00301	26.6221	4.93209e-16
	0.00301	26.7558	4.95684e-16
	0.00301	26.8896	4.98159e-16
	0.00301	27.0234	5.00634e-16
	0.00301	27.1572	5.0311e-16
	0.003	27.291	5.05585e-16
	0.003	27.4247	5.0806e-16
	0.003	27.5585	5.10535e-16
	0.003	27.6923	5.1301e-16
	0.003	27.8261	5.15485e-16
	0.003	27.9599	5.17961e-16
	0.003	28.0937	5.20436e-16
	0.003	28.2274	5.22911e-16
	0.00299	28.3612	5.25386e-16
	0.00299	28.495	5.27861e-16
	0.00299	28.6288	5.30336e-16
	0.00299	28.7625	5.32812e-16
	0.00299	28.8963	5.35287e-16
	0.00299	29.0301	5.37762e-16
	0.00299	29.1639	5.40237e-16
	0.00299	29.2977	5.42712e-16
	0.00298	29.4314	5.45187e-16
	0.00298	29.5652	5.47663e-16
	0.00298	29.699	5.50138e-16
	0.00298	29.8328	5.52613e-16
	0.00298	29.9666	5.55088e-16
	0.00298	30.1003	5.57563e-16
	0.00298	30.2341	5.60038e-16
	0.00298	30.3679	5.62514e-16
	0.00297	30.5017	5.64989e-16
	0.00297	30.6354	5.67464e-16
	0.00297	30.7692	5.69939e-16
	0.00297	30.903	5.72414e-16
	0.00297	31.0368	5.74889e-16
	0.00297	31.1706	5.77365e-16
	0.00297	31.3043	5.7984e-16
	0.00297	31.4381	5.82315e-16
	0.00296	31.5719	5.8479e-16
	0.00296	31.7057	5.87265e-16
	0.00296	31.8395	5.8974e-16
	0.00296	31.9732	5.92215e-16
	0.00296	32.107	5.94691e-16
	0.00296	32.2408	5.97166e-16
	0.00296	32.3746	5.99641e-16
	0.00296	32.5084	6.02116e-16
	0.00295	32.6421	6.04591e-16
	0.00295	32.7759	6.07066e-16
	0.00295	32.9097	6.09542e-16
	0.00295	33.0435	6.12017e-16
	0.00295	33.1773	6.14492e-16
	0.00295	33.311	6.16967e-16
	0.00295	33.4448	6.19442e-16
	0.00295	33.5786	6.21917e-16
	0.00294	33.7124	6.24393e-16
	0.00294	33.8462	6.26868e-16
	0.00294	33.9799	6.29343e-16
	0.00294	34.1137	6.31818e-16
	0.00294	34.2475	6.34293e-16
	0.00294	34.3813	6.36768e-16
	0.00294	34.5151	6.39244e-16
	0.00294	34.6488	6.41719e-16
	0.00293	34.7826	6.44194e-16
	0.00293	34.9164	6.46669e-16
	0.00293	35.0502	6.49144e-16
	0.00293	35.184	6.51619e-16
	0.00293	35.3177	6.54095e-16
	0.00293	35.4515	6.5657e-16
	0.00293	35.5853	6.59045e-16
	0.00293	35.7191	6.6152e-16
	0.00292	35.8528	6.63995e-16
	0.00292	35.9866	6.6647e-16
	0.00292	36.1204	6.68946e-16
	0.00292	36.2542	6.71421e-16
	0.00292	36.388	6.73896e-16
	0.00292	36.5217	6.76371e-16
	0.00292	36.6555	6.78846e-16
	0.00292	36.7893	6.81321e-16
	0.00291	36.9231	6.83797e-16
	0.00291	37.0569	6.86272e-16
	0.00291	37.1906	6.88747e-16
	0.00291	37.3244	6.91222e-16
	0.00291	37.4582	6.93697e-16
	0.00291	37.592	6.96172e-16
	0.00291	37.7257	6.98648e-16
	0.00291	37.8595	7.01123e-16
	0.0029	37.9933	7.03598e-16
	0.0029	38.1271	7.06073e-16
	0.0029	38.2609	7.08548e-16
	0.0029	38.3946	7.11023e-16
	0.0029	38.5284	7.13499e-16
	0.0029	38.6622	7.15974e-16
	0.0029	38.796	7.18449e-16
	0.0029	38.9298	7.20924e-16
	0.00289	39.0635	7.23399e-16
	0.00289	39.1973	7.25874e-16
	0.00289	39.3311	7.2835e-16
	0.00289	39.4649	7.30825e-16
	0.00289	39.5987	7.333e-16
	0.00289	39.7324	7.35775e-16
	0.00289	39.8662	7.3825e-16
	0.00289	40	7.40725e-16
	0.00652	0	1.30222e-18
	0.00651	0.13378	3.77713e-18
	0.00651	0.26756	6.25205e-18
	0.00651	0.40134	8.72696e-18
	0.00651	0.53512	1.12019e-17
	0.0065	0.6689	1.36768e-17
	0.0065	0.80268	1.61517e-17
	0.0065	0.93645	1.86266e-17
	0.0065	1.07023	2.11015e-17
	0.00649	1.20401	2.35765e-17
	0.00649	1.33779	2.60514e-17
	0.00649	1.47157	2.85263e-17
	0.00649	1.60535	3.10012e-17
	0.00648	1.73913	3.34761e-17
	0.00648	1.87291	3.5951e-17
	0.00648	2.00669	3.8426e-17
	0.00648	2.14047	4.09009e-17
	0.00647	2.27425	4.33758e-17
	0.00647	2.40803	4.58507e-17
	0.00647	2.54181	4.83256e-17
	0.00647	2.67559	5.08005e-17
	0.00646	2.80936	5.32755e-17
	0.00646	2.94314	5.57504e-17
	0.00646	3.07692	5.82253e-17
	0.00646	3.2107	6.07002e-17
	0.00645	3.34448	6.31751e-17
	0.00645	3.47826	6.565e-17
	0.00645	3.61204	6.81249e-17
	0.00645	3.74582	7.05999e-17
	0.00644	3.8796	7.30748e-17
	0.00644	4.01338	7.55497e-17
	0.00644	4.14716	7.80246e-17
	0.00644	4.28094	8.04995e-17
	0.00643	4.41472	8.29744e-17
	0.00643	4.54849	8.54494e-17
	0.00643	4.68227	8.79243e-17
	0.00643	4.81605	9.03992e-17
	0.00642	4.94983	9.28741e-17
	0.00642	5.08361	9.5349e-17
	0.00642	5.21739	9.78239e-17
	0.00642	5.35117	1.00299e-16
	0.00641	5.48495	1.02774e-16
	0.00641	5.61873	1.05249e-16
	0.00641	5.75251	1.07724e-16
	0.00641	5.88629	1.10199e-16
	0.0064	6.02007	1.12673e-16
	0.0064	6.15385	1.15148e-16
	0.0064	6.28763	1.17623e-16
	0.0064	6.4214	1.20098e-16
	0.00639	6.55518	1.22573e-16
	0.00639	6.68896	1.25048e-16
	0.00639	6.82274	1.27523e-16
	0.00639	6.95652	1.29998e-16
	0.00638	7.0903	1.32473e-16
	0.00638	7.22408	1.34948e-16
	0.00638	7.35786	1.37423e-16
	0.00638	7.49164	1.39898e-16
	0.00637	7.62542	1.42372e-16
	0.00637	7.7592	1.44847e-16
	0.00637	7.89298	1.47322e-16
	0.00637	8.02676	1.49797e-16
	0.00636	8.16054	1.52272e-16
	0.00636	8.29431	1.54747e-16
	0.00636	8.42809	1.57222e-16
	0.00636	8.56187	1.59697e-16
	0.00635	8.69565	1.62172e-16
	0.00635	8.82943	1.64647e-16
	0.00635	8.96321	1.67122e-16
	0.00635	9.09699	1.69596e-16
	0.00634	9.23077	1.72071e-16
	0.00634	9.36455	1.74546e-16
	0.00634	9.49833	1.77021e-16
	0.00634	9.63211	1.79496e-16
	0.00633	9.76589	1.81971e-16
	0.00633	9.89967	1.84446e-16
	0.00633	10.0334	1.86921e-16
	0.00633	10.1672	1.89396e-16
	0.00632	10.301	1.91871e-16
	0.00632	10.4348	1.94346e-16
	0.00632	10.5686	1.96821e-16
	0.00632	10.7023	1.99295e-16
	0.00631	10.8361	2.0177e-16
	0.00631	10.9699	2.04245e-16
	0.00631	11.1037	2.0672e-16
	0.00631	11.2375	2.09195e-16
	0.0063	11.3712	2.1167e-16
	0.0063	11.505	2.14145e-16
	0.0063	11.6388	2.1662e-16
	0.0063	11.7726	2.19095e-16
	0.00629	11.9063	2.2157e-16
	0.00629	12.0401	2.24045e-16
	0.00629	12.1739	2.2652e-16
	0.00629	12.3077	2.28994e-16
	0.00628	12.4415	2.31469e-16
	0.00628	12.5753	2.33944e-16
	0.00628	12.709	2.36419e-16
	0.00628	12.8428	2.38894e-16
	0.00627	12.9766	2.41369e-16
	0.00627	13.1104	2.43844e-16
	0.00627	13.2441	2.46319e-16
	0.00627	13.3779	2.48794e-16
	0.00626	13.5117	2.51269e-16
	0.00626	13.6455	2.53744e-16
	0.00626	13.7793	2.56219e-16
	0.00626	13.913	2.58693e-16
	0.00625	14.0468	2.61168e-16
	0.00625	14.1806	2.63643e-16
	0.00625	14.3144	2.66118e-16
	0.00625	14.4482	2.68593e-16
	0.00624	14.5819	2.71068e-16
	0.00624	14.7157	2.73543e-16
	0.00624	14.8495	2.76018e-16
	0.00624	14.9833	2.78493e-16
	0.00623	15.1171	2.80968e-16
	0.00623	15.2508	2.83443e-16
	0.00623	15.3846	2.85918e-16
	0.00623	15.5184	2.88392e-16
	0.00622	15.6522	2.90867e-16
	0.00622	15.7859	2.93342e-16
	0.00622	15.9197	2.95817e-16
	0.00622	16.0535	2.98292e-16
	0.00621	16.1873	3.00767e-16
	0.00621	16.3211	3.03242e-16
	0.00621	16.4549	3.05717e-16
	0.00621	16.5886	3.08192e-16
	0.0062	16.7224	3.10667e-16
	0.0062	16.8562	3.13142e-16
	0.0062	16.99	3.15617e-16
	0.0062	17.1238	3.18091e-16
	0.00619	17.2575	3.20566e-16
	0.00619	17.3913	3.23041e-16
	0.00619	17.5251	3.25516e-16
	0.00619	17.6589	3.27991e-16
	0.00619	17.7926	3.30466e-16
	0.00618	17.9264	3.32941e-16
	0.00618	18.0602	3.35416e-16
	0.00618	18.194	3.37891e-16
	0.00618	18.3278	3.40366e-16
	0.00617	18.4615	3.42841e-16
	0.00617	18.5953	3.45316e-16
	0.00617	18.7291	3.4779e-16
	0.00617	18.8629	3.50265e-16
	0.00616	18.9967	3.5274e-16
	0.00616	19.1304	3.55215e-16
	0.00616	19.2642	3.5769e-16
	0.00616	19.398	3.60165e-16
	0.00615	19.5318	3.6264e-16
	0.00615	19.6655	3.65115e-16
	0.00615	19.7993	3.6759e-16
	0.00615	19.9331	3.70065e-16
	0.00614	20.0669	3.7254e-16
	0.00614	20.2007	3.75015e-16
	0.00614	20.3345	3.77489e-16
	0.00614	20.4682	3.79964e-16
	0.00613	20.602	3.82439e-16
	0.00613	20.7358	3.84914e-16
	0.00613	20.8696	3.87389e-16
	0.00613	21.0033	3.89864e-16
	0.00612	21.1371	3.92339e-16
	0.00612	21.2709	3.94814e-16
	0.00612	21.4047	3.97289e-16
	0.00612	21.5385	3.99764e-16
	0.00611	21.6722	4.02239e-16
	0.00611	21.806	4.04714e-16
	0.00611	21.9398	4.07188e-16
	0.00611	22.0736	4.09663e-16
	0.0061	22.2074	4.12138e-16
	0.0061	22.3411	4.14613e-16
	0.0061	22.4749	4.17088e-16
	0.0061	22.6087	4.19563e-16
	0.00609	22.7425	4.22038e-16
	0.00609	22.8762	4.24513e-16
	0.00609	23.01	4.26988e-16
	0.00609	23.1438	4.29463e-16
	0.00608	23.2776	4.31938e-16
	0.00608	23.4114	4.34413e-16
	0.00608	23.5451	4.36887e-16
	0.00608	23.6789	4.39362e-16
	0.00607	23.8127	4.41837e-16
	0.00607	23.9465	4.44312e-16
	0.00607	24.0803	4.46787e-16
	0.00607	24.2141	4.49262e-16
	0.00606	24.3478	4.51737e-16
	0.00606	24.4816	4.54212e-16
	0.00606	24.6154	4.56687e-16
	0.00606	24.7492	4.59162e-16
	0.00605	24.8829	4.61637e-16
	0.00605	25.0167	4.64111e-16
	0.00605	25.1505	4.66586e-16
	0.00605	25.2843	4.69061e-16
	0.00604	25.4181	4.71536e-16
	0.00604	25.5518	4.74011e-16
	0.00604	25.6856	4.76486e-16
	0.00604	25.8194	4.78961e-16
	0.00603	25.9532	4.81436e-16
	0.00603	26.087	4.83911e-16
	0.00603	26.2207	4.86386e-16
	0.00603	26.3545	4.88861e-16
	0.00602	26.4883	4.91336e-16
	0.00602	26.6221	4.9381e-16
	0.00602	26.7558	4.96285e-16
	0.00602	26.8896	4.9876e-16
	0.00601	27.0234	5.01235e-16
	0.00601	27.1572	5.0371e-16
	0.00601	27.291	5.06185e-16
	0.00601	27.4247	5.0866e-16
	0.006	27.5585	5.11135e-16
	0.006	27.6923	5.1361e-16
	0.006	27.8261	5.16085e-16
	0.006	27.9599	5.1856e-16
	0.00599	28.0937	5.21035e-16
	0.00599	28.2274	5.23509e-16
	0.00599	28.3612	5.25984e-16
	0.00599	28.495	5.28459e-16
	0.00598	28.6288	5.30934e-16
	0.00598	28.7625	5.33409e-16
	0.00598	28.8963	5.35884e-16
	0.00598	29.0301	5.38359e-16
	0.00597	29.1639	5.40834e-16
	0.00597	29.2977	5.43309e-16
	0.00597	29.4314	5.45784e-16
	0.00597	29.5652	5.48259e-16
	0.00596	29.699	5.50734e-16
	0.00596	29.8328	5.53208e-16
	0.00596	29.9666	5.55683e-16
	0.00596	30.1003	5.58158e-16
	0.00595	30.2341	5.60633e-16
	0.00595	30.3679	5.63108e-16
	0.00595	30.5017	5.65583e-16
	0.00595	30.6354	5.68058e-16
	0.00594	30.7692	5.70533e-16
	0.00594	30.903	5.73008e-16
	0.00594	31.0368	5.75483e-16
	0.00594	31.1706	5.77958e-16
	0.00593	31.3043	5.80433e-16
	0.00593	31.4381	5.82907e-16
	0.00593	31.5719	5.85382e-16
	0.00593	31.7057	5.87857e-16
	0.00592	31.8395	5.90332e-16
	0.00592	31.9732	5.92807e-16
	0.00592	32.107	5.95282e-16
	0.00592	32.2408	5.97757e-16
	0.00591	32.3746	6.00232e-16
	0.00591	32.5084	6.02707e-16
	0.00591	32.6421	6.05182e-16
	0.00591	32.7759	6.07657e-16
	0.0059	32.9097	6.10132e-16
	0.0059	33.0435	6.12606e-16
	0.0059	33.1773	6.15081e-16
	0.0059	33.311	6.17556e-16
	0.00589	33.4448	6.20031e-16
	0.00589	33.5786	6.22506e-16
	0.00589	33.7124	6.24981e-16
	0.00589	33.8462	6.27456e-16
	0.00588	33.9799	6.29931e-16
	0.00588	34.1137	6.32406e-16
	0.00588	34.2475	6.34881e-16
	0.00588	34.3813	6.37356e-16
	0.00587	34.5151	6.39831e-16
	0.00587	34.6488	6.42305e-16
	0.00587	34.7826	6.4478e-16
	0.00587	34.9164	6.47255e-16
	0.00586	35.0502	6.4973e-16
	0.00586	35.184	6.52205e-16
	0.00586	35.3177	6.5468e-16
	0.00586	35.4515	6.57155e-16
	0.00585	35.5853	6.5963e-16
	0.00585	35.7191	6.62105e-16
	0.00585	35.8528	6.6458e-16
	0.00585	35.9866	6.67055e-16
	0.00584	36.1204	6.6953e-16
	0.00584	36.2542	6.72004e-16
	0.00584	36.388	6.74479e-16
	0.00584	36.5217	6.76954e-16
	0.00583	36.6555	6.79429e-16
	0.00583	36.7893	6.81904e-16
	0.00583	36.9231	6.84379e-16
	0.00583	37.0569	6.86854e-16
	0.00582	37.1906	6.89329e-16
	0.00582	37.3244	6.91804e-16
	0.00582	37.4582	6.94279e-16
	0.00582	37.592	6.96754e-16
	0.00581	37.7257	6.99229e-16
	0.00581	37.8595	7.01703e-16
	0.00581	37.9933	7.04178e-16
	0.00581	38.1271	7.06653e-16
	0.0058	38.2609	7.09128e-16
	0.0058	38.3946	7.11603e-16
	0.0058	38.5284	7.14078e-16
	0.0058	38.6622	7.16553e-16
	0.00579	38.796	7.19028e-16
	0.00579	38.9298	7.21503e-16
	0.00579	39.0635	7.23978e-16
	0.00579	39.1973	7.26453e-16
	0.00578	39.3311	7.28927e-16
	0.00578	39.4649	7.31402e-16
	0.00578	39.5987	7.33877e-16
	0.00578	39.7324	7.36352e-16
	0.00577	39.8662	7.38827e-16
	0.00577	40	7.41302e-16
	0.00977	0	1.95332e-18
	0.00977	0.13378	4.42799e-18
	0.00977	0.26756	6.90266e-18
	0.00976	0.40134	9.37733e-18
	0.00976	0.53512	1.1852e-17
	0.00976	0.6689	1.43267e-17
	0.00975	0.80268	1.68013e-17
	0.00975	0.93645	1.9276e-17
	0.00974	1.07023	2.17507e-17
	0.00974	1.20401	2.42253e-17
	0.00974	1.33779	2.67e-17
	0.00973	1.47157	2.91747e-17
	0.00973	1.60535	3.16493e-17
	0.00973	1.73913	6.8248e-17
	0.00972	1.87291	7.31973e-17
	0.00972	2.00669	7.81467e-17
	0.00971	2.14047	8.3096e-17
	0.00971	2.27425	8.80453e-17
	0.00971	2.40803	9.29947e-17
	0.0097	2.54181	9.7944e-17
	0.0097	2.67559	1.02893e-16
	0.0097	2.80936	1.07843e-16
	0.00969	2.94314	1.12792e-16
	0.00969	3.07692	1.17741e-16
	0.00968	3.2107	1.22691e-16
	0.00968	3.34448	1.2764e-16
	0.00968	3.47826	1.32589e-16
	0.00967	3.61204	1.37539e-16
	0.00967	3.74582	1.42488e-16
	0.00967	3.8796	1.47437e-16
	0.00966	4.01338	1.52387e-16
	0.00966	4.14716	1.57336e-16
	0.00965	4.28094	1.62285e-16
	0.00965	4.41472	1.67235e-16
	0.00965	4.54849	1.72184e-16
	0.00964	4.68227	1.77133e-16
	0.00964	4.81605	1.82083e-16
	0.00964	4.94983	1.87032e-16
	0.00963	5.08361	1.91981e-16
	0.00963	5.21739	1.96931e-16
	0.00962	5.35117	2.0188e-16
	0.00962	5.48495	2.06829e-16
	0.00962	5.61873	2.11779e-16
	0.00961	5.75251	2.16728e-16
	0.00961	5.88629	2.21677e-16
	0.00961	6.02007	2.26627e-16
	0.0096	6.15385	2.31576e-16
	0.0096	6.28763	2.36525e-16
	0.0096	6.4214	2.41475e-16
	0.00959	6.55518	2.46424e-16
	0.00959	6.68896	2.51373e-16
	0.00958	6.82274	2.56323e-16
	0.00958	6.95652	2.61272e-16
	0.00958	7.0903	2.66221e-16
	0.00957	7.22408	2.71171e-16
	0.00957	7.35786	2.7612e-16
	0.00957	7.49164	2.81069e-16
	0.00956	7.62542	2.86019e-16
	0.00956	7.7592	2.90968e-16
	0.00955	7.89298	2.95917e-16
	0.00955	8.02676	3.00867e-16
	0.00955	8.16054	3.05816e-16
	0.00954	8.29431	3.10765e-16
	0.00954	8.42809	3.15715e-16
	0.00954	8.56187	3.20664e-16
	0.00953	8.69565	3.25613e-16
	0.00953	8.82943	3.30563e-16
	0.00952	8.96321	3.35512e-16
	0.00952	9.09699	3.40461e-16
	0.00952	9.23077	3.45411e-16
	0.00951	9.36455	3.5036e-16
	0.00951	9.49833	3.55309e-16
	0.00951	9.63211	3.60259e-16
	0.0095	9.76589	3.65208e-16
	0.0095	9.89967	3.70157e-16
	0.00949	10.0334	3.75107e-16
	0.00949	10.1672	3.80056e-16
	0.00949	10.301	3.85005e-16
	0.00948	10.4348	3.89955e-16
	0.00948	10.5686	3.94904e-16
	0.00948	10.7023	3.99853e-16
	0.00947	10.8361	4.04803e-16
	0.00947	10.9699	4.09752e-16
	0.00946	11.1037	4.14701e-16
	0.00946	11.2375	4.19651e-16
	0.00946	11.3712	4.246e-16
	0.00945	11.505	4.29549e-16
	0.00945	11.6388	4.34499e-16
	0.00945	11.7726	4.39448e-16
	0.00944	11.9063	4.44397e-16
	0.00944	12.0401	4.49347e-16
	0.00943	12.1739	4.54296e-16
	0.00943	12.3077	4.59245e-16
	0.00943	12.4415	4.64195e-16
	0.00942	12.5753	4.69144e-16
	0.00942	12.709	4.74093e-16
	0.00942	12.8428	4.79043e-16
	0.00941	12.9766	4.83992e-16
	0.00941	13.1104	4.88941e-16
	0.0094	13.2441	4.93891e-16
	0.0094	13.3779	4.9884e-16
	0.0094	13.5117	5.03789e-16
	0.00939	13.6455	5.08739e-16
	0.00939	13.7793	5.13688e-16
	0.00939	13.913	5.18637e-16
	0.00938	14.0468	5.23587e-16
	0.00938	14.1806	5.28536e-16
	0.00937	14.3144	5.33485e-16
	0.00937	14.4482	5.38435e-16
	0.00937	14.5819	5.43384e-16
	0.00936	14.7157	5.48333e-16
	0.00936	14.8495	5.53283e-16
	0.00936	14.9833	5.58232e-16
	0.00935	15.1171	5.63181e-16
	0.00935	15.2508	5.68131e-16
	0.00934	15.3846	5.7308e-16
	0.00934	15.5184	5.78029e-16
	0.00934	15.6522	5.82979e-16
	0.00933	15.7859	5.87928e-16
	0.00933	15.9197	5.92877e-16
	0.00933	16.0535	5.97827e-16
	0.00932	16.1873	6.02776e-16
	0.00932	16.3211	6.07725e-16
	0.00931	16.4549	6.12675e-16
	0.00931	16.5886	6.17624e-16
	0.00931	16.7224	6.22573e-16
	0.0093	16.8562	6.27523e-16
	0.0093	16.99	6.32472e-16
	0.0093	17.1238	6.37421e-16
	0.00929	17.2575	6.42371e-16
	0.00929	17.3913	6.4732e-16
	0.00929	17.5251	6.52269e-16
	0.00928	17.6589	6.57219e-16
	0.00928	17.7926	6.62168e-16
	0.00927	17.9264	6.67117e-16
	0.00927	18.0602	6.72067e-16
	0.00927	18.194	6.77016e-16
	0.00926	18.3278	6.81965e-16
	0.00926	18.4615	6.86915e-16
	0.00926	18.5953	6.91864e-16
	0.00925	18.7291	6.96813e-16
	0.00925	18.8629	7.01763e-16
	0.00924	18.9967	7.06712e-16
	0.00924	19.1304	7.11661e-16
	0.00924	19.2642	7.16611e-16
	0.00923	19.398	7.2156e-16
	0.00923	19.5318	7.26509e-16
	0.00923	19.6655	7.31459e-16
	0.00922	19.7993	7.36408e-16
	0.00922	19.9331	7.41357e-16
	0.00921	20.0669	7.46307e-16
	0.00921	20.2007	7.51256e-16
	0.00921	20.3345	7.56205e-16
	0.0092	20.4682	7.61155e-16
	0.0092	20.602	7.66104e-16
	0.0092	20.7358	7.71053e-16
	0.00919	20.8696	7.76003e-16
	0.00919	21.0033	7.80952e-16
	0.00918	21.1371	7.85901e-16
	0.00918	21.2709	7.90851e-16
	0.00918	21.4047	7.958e-16
	0.00917	21.5385	8.00749e-16
	0.00917	21.6722	8.05699e-16
	0.00917	21.806	8.10648e-16
	0.00916	21.9398	8.15597e-16
	0.00916	22.0736	8.20547e-16
	0.00915	22.2074	8.25496e-16
	0.00915	22.3411	8.30445e-16
	0.00915	22.4749	8.35395e-16
	0.00914	22.6087	8.40344e-16
	0.00914	22.7425	8.45293e-16
	0.00914	22.8762	8.50243e-16
	0.00913	23.01	8.55192e-16
	0.00913	23.1438	8.60141e-16
	0.00912	23.2776	8.65091e-16
	0.00912	23.4114	8.7004e-16
	0.00912	23.5451	8.74989e-16
	0.00911	23.6789	8.79939e-16
	0.00911	23.8127	8.84888e-16
	0.00911	23.9465	8.89837e-16
	0.0091	24.0803	8.94787e-16
	0.0091	24.2141	8.99736e-16
	0.00909	24.3478	9.04685e-16
	0.00909	24.4816	9.09635e-16
	0.00909	24.6154	9.14584e-16
	0.00908	24.7492	9.19533e-16
	0.00908	24.8829	9.24483e-16
	0.00908	25.0167	9.29432e-16
	0.00907	25.1505	9.34381e-16
	0.00907	25.2843	9.39331e-16
	0.00906	25.4181	9.4428e-16
	0.00906	25.5518	9.49229e-16
	0.00906	25.6856	9.54179e-16
	0.00905	25.8194	9.59128e-16
	0.00905	25.9532	9.64077e-16
	0.00905	26.087	9.69027e-16
	0.00904	26.2207	9.73976e-16
	0.00904	26.3545	9.78925e-16
	0.00903	26.4883	9.83875e-16
	0.00903	26.6221	9.88824e-16
	0.00903	26.7558	9.93773e-16
	0.00902	26.8896	9.98723e-16
	0.00902	27.0234	1.00367e-15
	0.00902	27.1572	1.00862e-15
	0.00901	27.291	1.01357e-15
	0.00901	27.4247	1.01852e-15
	0.009	27.5585	1.02347e-15
	0.009	27.6923	1.02842e-15
	0.009	27.8261	1.03337e-15
	0.00899	27.9599	1.03832e-15
	0.00899	28.0937	1.04327e-15
	0.00899	28.2274	1.04822e-15
	0.00898	28.3612	1.05317e-15
	0.00898	28.495	1.05811e-15
	0.00897	28.6288	1.06306e-15
	0.00897	28.7625	1.06801e-15
	0.00897	28.8963	1.07296e-15
	0.00896	29.0301	1.07791e-15
	0.00896	29.1639	1.08286e-15
	0.00896	29.2977	1.08781e-15
	0.00895	29.4314	1.09276e-15
	0.00895	29.5652	1.09771e-15
	0.00895	29.699	1.10266e-15
	0.00894	29.8328	1.10761e-15
	0.00894	29.9666	1.11256e-15
	0.00893	30.1003	1.11751e-15
	0.00893	30.2341	1.12246e-15
	0.00893	30.3679	1.12741e-15
	0.00892	30.5017	1.13235e-15
	0.00892	30.6354	1.1373e-15
	0.00892	30.7692	1.14225e-15
	0.00891	30.903	1.1472e-15
	0.00891	31.0368	1.15215e-15
	0.0089	31.1706	1.1571e-15
	0.0089	31.3043	1.16205e-15
	0.0089	31.4381	1.167e-15
	0.00889	31.5719	1.17195e-15
	0.00889	31.7057	1.1769e-15
	0.00889	31.8395	1.18185e-15
	0.00888	31.9732	1.1868e-15
	0.00888	32.107	1.19175e-15
	0.00887	32.2408	1.1967e-15
	0.00887	32.3746	1.20165e-15
	0.00887	32.5084	1.20659e-15
	0.00886	32.6421	1.21154e-15
	0.00886	32.7759	1.21649e-15
	0.00886	32.9097	1.22144e-15
	0.00885	33.0435	1.22639e-15
	0.00885	33.1773	1.23134e-15
	0.00884	33.311	1.23629e-15
	0.00884	33.4448	1.24124e-15
	0.00884	33.5786	1.24619e-15
	0.00883	33.7124	1.25114e-15
	0.00883	33.8462	1.25609e-15
	0.00883	33.9799	1.26104e-15
	0.00882	34.1137	1.26599e-15
	0.00882	34.2475	1.27094e-15
	0.00881	34.3813	1.27589e-15
	0.00881	34.5151	1.28083e-15
	0.00881	34.6488	1.28578e-15
	0.0088	34.7826	1.29073e-15
	0.0088	34.9164	1.29568e-15
	0.0088	35.0502	1.30063e-15
	0.00879	35.184	1.30558e-15
	0.00879	35.3177	1.31053e-15
	0.00878	35.4515	1.31548e-15
	0.00878	35.5853	1.32043e-15
	0.00878	35.7191	1.32538e-15
	0.00877	35.8528	1.33033e-15
	0.00877	35.9866	1.33528e-15
	0.00877	36.1204	1.34023e-15
	0.00876	36.2542	1.34518e-15
	0.00876	36.388	1.35013e-15
	0.00875	36.5217	1.35507e-15
	0.00875	36.6555	1.36002e-15
	0.00875	36.7893	1.36497e-15
	0.00874	36.9231	1.36992e-15
	0.00874	37.0569	1.37487e-15
	0.00874	37.1906	1.37982e-15
	0.00873	37.3244	1.38477e-15
	0.00873	37.4582	1.38972e-15
	0.00872	37.592	1.39467e-15
	0.00872	37.7257	1.39962e-15
	0.00872	37.8595	1.40457e-15
	0.00871	37.9933	1.40952e-15
	0.00871	38.1271	1.41447e-15
	0.00871	38.2609	1.41942e-15
	0.0087	38.3946	1.42437e-15
	0.0087	38.5284	1.42931e-15
	0.00869	38.6622	1.43426e-15
	0.00869	38.796	1.43921e-15
	0.00869	38.9298	1.44416e-15
	0.00868	39.0635	1.44911e-15
	0.00868	39.1973	1.45406e-15
	0.00868	39.3311	1.45901e-15
	0.00867	39.4649	1.46396e-15
	0.00867	39.5987	1.46891e-15
	0.00866	39.7324	1.47386e-15
	0.00866	39.8662	1.47881e-15
	0.00866	40	1.48376e-15
	0.01303	0	5.20887e-18
	0.01303	0.13378	1.01577e-17
	0.01302	0.26756	1.51065e-17
	0.01302	0.40134	2.00554e-17
	0.01301	0.53512	2.50042e-17
	0.01301	0.6689	2.9953e-17
	0.013	0.80268	3.49019e-17
	0.013	0.93645	3.98507e-17
	0.01299	1.07023	4.47996e-17
	0.01299	1.20401	4.97484e-17
	0.01298	1.33779	5.46972e-17
	0.01298	1.47157	5.96461e-17
	0.01297	1.60535	6.45949e-17
	0.01297	1.73913	6.95437e-17
	0.01296	1.87291	7.44926e-17
	0.01296	2.00669	7.94414e-17
	0.01295	2.14047	8.43902e-17
	0.01295	2.27425	8.93391e-17
	0.01294	2.40803	9.42879e-17
	0.01294	2.54181	9.92368e-17
	0.01293	2.67559	1.04186e-16
	0.01293	2.80936	1.09134e-16
	0.01292	2.94314	1.14083e-16
	0.01292	3.07692	1.19032e-16
	0.01291	3.2107	1.23981e-16
	0.01291	3.34448	1.2893e-16
	0.0129	3.47826	1.33879e-16
	0.0129	3.61204	1.38827e-16
	0.01289	3.74582	1.43776e-16
	0.01289	3.8796	1.48725e-16
	0.01288	4.01338	1.53674e-16
	0.01288	4.14716	1.58623e-16
	0.01287	4.28094	1.63572e-16
	0.01287	4.41472	1.6852e-16
	0.01286	4.54849	1.73469e-16
	0.01286	4.68227	1.78418e-16
	0.01285	4.81605	1.83367e-16
	0.01285	4.94983	1.88316e-16
	0.01284	5.08361	1.93265e-16
	0.01284	5.21739	1.98213e-16
	0.01283	5.35117	2.03162e-16
	0.01283	5.48495	2.08111e-16
	0.01282	5.61873	2.1306e-16
	0.01282	5.75251	2.18009e-16
	0.01281	5.88629	2.22958e-16
	0.01281	6.02007	2.27907e-16
	0.0128	6.15385	2.32855e-16
	0.0128	6.28763	2.37804e-16
	0.01279	6.4214	2.42753e-16
	0.01279	6.55518	2.47702e-16
	0.01278	6.68896	2.52651e-16
	0.01278	6.82274	2.576e-16
	0.01277	6.95652	2.62548e-16
	0.01277	7.0903	2.67497e-16
	0.01276	7.22408	2.72446e-16
	0.01276	7.35786	2.77395e-16
	0.01275	7.49164	2.82344e-16
	0.01275	7.62542	2.87293e-16
	0.01274	7.7592	2.92241e-16
	0.01274	7.89298	2.9719e-16
	0.01273	8.02676	3.02139e-16
	0.01273	8.16054	3.07088e-16
	0.01272	8.29431	3.12037e-16
	0.01272	8.42809	3.16986e-16
	0.01271	8.56187	3.21934e-16
	0.01271	8.69565	3.26883e-16
	0.0127	8.82943	3.31832e-16
	0.0127	8.96321	3.36781e-16
	0.01269	9.09699	3.4173e-16
	0.01269	9.23077	3.46679e-16
	0.01268	9.36455	3.51627e-16
	0.01268	9.49833	3.56576e-16
	0.01267	9.63211	3.61525e-16
	0.01267	9.76589	3.66474e-16
	0.01266	9.89967	3.71423e-16
	0.01266	10.0334	3.76372e-16
	0.01265	10.1672	3.8132e-16
	0.01265	10.301	3.86269e-16
	0.01264	10.4348	3.91218e-16
	0.01264	10.5686	3.96167e-16
	0.01263	10.7023	4.01116e-16
	0.01263	10.8361	4.06065e-16
	0.01262	10.9699	4.11013e-16
	0.01262	11.1037	4.15962e-16
	0.01261	11.2375	4.20911e-16
	0.01261	11.3712	4.2586e-16
	0.0126	11.505	4.30809e-16
	0.0126	11.6388	4.35758e-16
	0.01259	11.7726	4.40706e-16
	0.01259	11.9063	4.45655e-16
	0.01258	12.0401	4.50604e-16
	0.01258	12.1739	4.55553e-16
	0.01257	12.3077	4.60502e-16
	0.01257	12.4415	4.65451e-16
	0.01256	12.5753	4.70399e-16
	0.01256	12.709	4.75348e-16
	0.01255	12.8428	4.80297e-16
	0.01255	12.9766	4.85246e-16
	0.01254	13.1104	4.90195e-16
	0.01254	13.2441	4.95144e-16
	0.01253	13.3779	5.00093e-16
	0.01253	13.5117	5.05041e-16
	0.01252	13.6455	5.0999e-16
	0.01252	13.7793	5.14939e-16
	0.01251	13.913	5.19888e-16
	0.01251	14.0468	5.24837e-16
	0.0125	14.1806	5.29786e-16
	0.0125	14.3144	5.34734e-16
	0.01249	14.4482	5.39683e-16
	0.01249	14.5819	5.44632e-16
	0.01248	14.7157	5.49581e-16
	0.01248	14.8495	5.5453e-16
	0.01247	14.9833	5.59479e-16
	0.01247	15.1171	5.64427e-16
	0.01246	15.2508	5.69376e-16
	0.01246	15.3846	5.74325e-16
	0.01245	15.5184	5.79274e-16
	0.01245	15.6522	5.84223e-16
	0.01244	15.7859	5.89172e-16
	0.01244	15.9197	5.9412e-16
	0.01243	16.0535	5.99069e-16
	0.01243	16.1873	6.04018e-16
	0.01242	16.3211	6.08967e-16
	0.01242	16.4549	6.13916e-16
	0.01241	16.5886	6.18865e-16
	0.01241	16.7224	6.23813e-16
	0.0124	16.8562	6.28762e-16
	0.0124	16.99	6.33711e-16
	0.01239	17.1238	6.3866e-16
	0.01239	17.2575	6.43609e-16
	0.01238	17.3913	6.48558e-16
	0.01238	17.5251	6.53506e-16
	0.01238	17.6589	6.58455e-16
	0.01237	17.7926	6.63404e-16
	0.01237	17.9264	6.68353e-16
	0.01236	18.0602	6.73302e-16
	0.01236	18.194	6.78251e-16
	0.01235	18.3278	6.83199e-16
	0.01235	18.4615	6.88148e-16
	0.01234	18.5953	6.93097e-16
	0.01234	18.7291	6.98046e-16
	0.01233	18.8629	7.02995e-16
	0.01233	18.9967	7.07944e-16
	0.01232	19.1304	7.12892e-16
	0.01232	19.2642	7.17841e-16
	0.01231	19.398	7.2279e-16
	0.01231	19.5318	7.27739e-16
	0.0123	19.6655	7.32688e-16
	0.0123	19.7993	7.37637e-16
	0.01229	19.9331	7.42585e-16
	0.01229	20.0669	7.47534e-16
	0.01228	20.2007	7.52483e-16
	0.01228	20.3345	7.57432e-16
	0.01227	20.4682	7.62381e-16
	0.01227	20.602	7.6733e-16
	0.01226	20.7358	7.72278e-16
	0.01226	20.8696	7.77227e-16
	0.01225	21.0033	7.82176e-16
	0.01225	21.1371	7.87125e-16
	0.01224	21.2709	7.92074e-16
	0.01224	21.4047	7.97023e-16
	0.01223	21.5385	8.01972e-16
	0.01223	21.6722	8.0692e-16
	0.01222	21.806	8.11869e-16
	0.01222	21.9398	8.16818e-16
	0.01221	22.0736	8.21767e-16
	0.01221	22.2074	8.26716e-16
	0.0122	22.3411	8.31665e-16
	0.0122	22.4749	8.36613e-16
	0.01219	22.6087	8.41562e-16
	0.01219	22.7425	8.46511e-16
	0.01218	22.8762	8.5146e-16
	0.01218	23.01	8.56409e-16
	0.01217	23.1438	8.61358e-16
	0.01217	23.2776	8.66306e-16
	0.01216	23.4114	8.71255e-16
	0.01216	23.5451	8.76204e-16
	0.01215	23.6789	8.81153e-16
	0.01215	23.8127	8.86102e-16
	0.01214	23.9465	8.91051e-16
	0.01214	24.0803	8.95999e-16
	0.01213	24.2141	9.00948e-16
	0.01213	24.3478	9.05897e-16
	0.01212	24.4816	9.10846e-16
	0.01212	24.6154	9.15795e-16
	0.01211	24.7492	9.20744e-16
	0.01211	24.8829	9.25692e-16
	0.0121	25.0167	9.30641e-16
	0.0121	25.1505	9.3559e-16
	0.01209	25.2843	9.40539e-16
	0.01209	25.4181	9.45488e-16
	0.01208	25.5518	9.50437e-16
	0.01208	25.6856	9.55385e-16
	0.01207	25.8194	9.60334e-16
	0.01207	25.9532	9.65283e-16
	0.01206	26.087	9.70232e-16
	0.01206	26.2207	9.75181e-16
	0.01205	26.3545	9.8013e-16
	0.01205	26.4883	9.85078e-16
	0.01204	26.6221	9.90027e-16
	0.01204	26.7558	9.94976e-16
	0.01203	26.8896	9.99925e-16
	0.01203	27.0234	1.00487e-15
	0.01202	27.1572	1.00982e-15
	0.01202	27.291	1.01477e-15
	0.01201	27.4247	1.01972e-15
	0.01201	27.5585	1.02467e-15
	0.012	27.6923	1.02962e-15
	0.012	27.8261	1.03457e-15
	0.01199	27.9599	1.03952e-15
	0.01199	28.0937	1.04446e-15
	0.01198	28.2274	1.04941e-15
	0.01198	28.3612	1.05436e-15
	0.01197	28.495	1.05931e-15
	0.01197	28.6288	1.06426e-15
	0.01196	28.7625	1.06921e-15
	0.01196	28.8963	1.07416e-15
	0.01195	29.0301	1.07911e-15
	0.01195	29.1639	1.08406e-15
	0.01194	29.2977	1.089e-15
	0.01194	29.4314	1.09395e-15
	0.01193	29.5652	1.0989e-15
	0.01193	29.699	1.10385e-15
	0.01192	29.8328	1.1088e-15
	0.01192	29.9666	1.11375e-15
	0.01191	30.1003	1.1187e-15
	0.01191	30.2341	1.12365e-15
	0.0119	30.3679	1.12859e-15
	0.0119	30.5017	1.13354e-15
	0.01189	30.6354	1.13849e-15
	0.01189	30.7692	1.14344e-15
	0.01188	30.903	1.14839e-15
	0.01188	31.0368	1.15334e-15
	0.01187	31.1706	1.15829e-15
	0.01187	31.3043	1.16324e-15
	0.01186	31.4381	1.16819e-15
	0.01186	31.5719	1.17313e-15
	0.01185	31.7057	1.17808e-15
	0.01185	31.8395	1.18303e-15
	0.01184	31.9732	1.18798e-15
	0.01184	32.107	1.19293e-15
	0.01183	32.2408	1.19788e-15
	0.01183	32.3746	1.20283e-15
	0.01182	32.5084	1.20778e-15
	0.01182	32.6421	1.21272e-15
	0.01181	32.7759	1.21767e-15
	0.01181	32.9097	1.22262e-15
	0.0118	33.0435	1.22757e-15
	0.0118	33.1773	1.23252e-15
	0.01179	33.311	1.23747e-15
	0.01179	33.4448	1.24242e-15
	0.01178	33.5786	1.24737e-15
	0.01178	33.7124	1.25232e-15
	0.01177	33.8462	1.25726e-15
	0.01177	33.9799	1.26221e-15
	0.01176	34.1137	1.26716e-15
	0.01176	34.2475	1.27211e-15
	0.01175	34.3813	1.27706e-15
	0.01175	34.5151	1.28201e-15
	0.01174	34.6488	1.28696e-15
	0.01174	34.7826	1.29191e-15
	0.01173	34.9164	1.29686e-15
	0.01173	35.0502	1.3018e-15
	0.01172	35.184	1.30675e-15
	0.01172	35.3177	1.3117e-15
	0.01171	35.4515	1.31665e-15
	0.01171	35.5853	1.3216e-15
	0.0117	35.7191	1.32655e-15
	0.0117	35.8528	1.3315e-15
	0.01169	35.9866	1.33645e-15
	0.01169	36.1204	1.34139e-15
	0.01168	36.2542	1.34634e-15
	0.01168	36.388	2.02694e-15
	0.01167	36.5217	2.03436e-15
	0.01167	36.6555	2.04179e-15
	0.01166	36.7893	2.04921e-15
	0.01166	36.9231	2.05663e-15
	0.01165	37.0569	2.06405e-15
	0.01165	37.1906	2.07148e-15
	0.01164	37.3244	2.0789e-15
	0.01164	37.4582	2.08632e-15
	0.01163	37.592	2.09375e-15
	0.01163	37.7257	2.10117e-15
	0.01162	37.8595	2.10859e-15
	0.01162	37.9933	2.11602e-15
	0.01161	38.1271	2.12344e-15
	0.01161	38.2609	2.13086e-15
	0.0116	38.3946	2.13829e-15
	0.0116	38.5284	2.14571e-15
	0.01159	38.6622	2.15313e-15
	0.01159	38.796	2.16056e-15
	0.01158	38.9298	2.16798e-15
	0.01158	39.0635	2.1754e-15
	0.01157	39.1973	2.18283e-15
	0.01157	39.3311	2.19025e-15
	0.01156	39.4649	2.19767e-15
	0.01156	39.5987	2.2051e-15
	0.01155	39.7324	2.21252e-15
	0.01155	39.8662	2.21994e-15
	0.01154	40	2.22737e-15
	0.01629	0	6.51108e-18
	0.01628	0.13378	1.14594e-17
	0.01628	0.26756	1.64078e-17
	0.01627	0.40134	2.13561e-17
	0.01627	0.53512	2.63044e-17
	0.01626	0.6689	3.12528e-17
	0.01625	0.80268	3.62011e-17
	0.01625	0.93645	4.11495e-17
	0.01624	1.07023	4.60978e-17
	0.01623	1.20401	5.10461e-17
	0.01623	1.33779	5.59945e-17
	0.01622	1.47157	6.09428e-17
	0.01622	1.60535	6.58911e-17
	0.01621	1.73913	7.08395e-17
	0.0162	1.87291	7.57878e-17
	0.0162	2.00669	8.07362e-17
	0.01619	2.14047	8.56845e-17
	0.01618	2.27425	9.06328e-17
	0.01618	2.40803	9.55812e-17
	0.01617	2.54181	1.0053e-16
	0.01617	2.67559	1.05478e-16
	0.01616	2.80936	1.10426e-16
	0.01615	2.94314	1.15375e-16
	0.01615	3.07692	1.20323e-16
	0.01614	3.2107	1.25271e-16
	0.01614	3.34448	1.3022e-16
	0.01613	3.47826	1.35168e-16
	0.01612	3.61204	1.40116e-16
	0.01612	3.74582	1.45065e-16
	0.01611	3.8796	2.25019e-16
	0.0161	4.01338	2.32442e-16
	0.0161	4.14716	2.39864e-16
	0.01609	4.28094	2.47287e-16
	0.01609	4.41472	2.54709e-16
	0.01608	4.54849	2.62132e-16
	0.01607	4.68227	2.69554e-16
	0.01607	4.81605	2.76977e-16
	0.01606	4.94983	2.84399e-16
	0.01605	5.08361	2.91822e-16
	0.01605	5.21739	2.99244e-16
	0.01604	5.35117	3.06667e-16
	0.01604	5.48495	3.14089e-16
	0.01603	5.61873	3.21512e-16
	0.01602	5.75251	3.28934e-16
	0.01602	5.88629	3.36357e-16
	0.01601	6.02007	3.43779e-16
	0.016	6.15385	3.51202e-16
	0.016	6.28763	3.58624e-16
	0.01599	6.4214	3.66047e-16
	0.01599	6.55518	3.7347e-16
	0.01598	6.68896	3.80892e-16
	0.01597	6.82274	3.88315e-16
	0.01597	6.95652	3.95737e-16
	0.01596	7.0903	4.0316e-16
	0.01595	7.22408	4.10582e-16
	0.01595	7.35786	4.18005e-16
	0.01594	7.49164	4.25427e-16
	0.01594	7.62542	4.3285e-16
	0.01593	7.7592	4.40272e-16
	0.01592	7.89298	4.47695e-16
	0.01592	8.02676	4.55117e-16
	0.01591	8.16054	4.6254e-16
	0.0159	8.29431	4.69962e-16
	0.0159	8.42809	4.77385e-16
	0.01589	8.56187	4.84807e-16
	0.01589	8.69565	4.9223e-16
	0.01588	8.82943	4.99652e-16
	0.01587	8.96321	5.07075e-16
	0.01587	9.09699	5.14497e-16
	0.01586	9.23077	5.2192e-16
	0.01585	9.36455	5.29342e-16
	0.01585	9.49833	5.36765e-16
	0.01584	9.63211	5.44187e-16
	0.01584	9.76589	5.5161e-16
	0.01583	9.89967	5.59032e-16
	0.01582	10.0334	5.66455e-16
	0.01582	10.1672	5.73877e-16
	0.01581	10.301	5.813e-16
	0.01581	10.4348	5.88722e-16
	0.0158	10.5686	5.96145e-16
	0.01579	10.7023	6.03567e-16
	0.01579	10.8361	6.1099e-16
	0.01578	10.9699	6.18412e-16
	0.01577	11.1037	6.25835e-16
	0.01577	11.2375	6.33257e-16
	0.01576	11.3712	6.4068e-16
	0.01576	11.505	6.48102e-16
	0.01575	11.6388	6.55525e-16
	0.01574	11.7726	6.62947e-16
	0.01574	11.9063	6.7037e-16
	0.01573	12.0401	6.77792e-16
	0.01572	12.1739	6.85215e-16
	0.01572	12.3077	6.92637e-16
	0.01571	12.4415	7.0006e-16
	0.01571	12.5753	7.07482e-16
	0.0157	12.709	7.14905e-16
	0.01569	12.8428	7.22327e-16
	0.01569	12.9766	7.2975e-16
	0.01568	13.1104	7.37172e-16
	0.01567	13.2441	7.44595e-16
	0.01567	13.3779	7.52017e-16
	0.01566	13.5117	7.5944e-16
	0.01566	13.6455	7.66862e-16
	0.01565	13.7793	7.74285e-16
	0.01564	13.913	7.81707e-16
	0.01564	14.0468	7.8913e-16
	0.01563	14.1806	7.96552e-16
	0.01562	14.3144	8.03975e-16
	0.01562	14.4482	8.11397e-16
	0.01561	14.5819	8.1882e-16
	0.01561	14.7157	8.26242e-16
	0.0156	14.8495	8.33665e-16
	0.01559	14.9833	8.41088e-16
	0.01559	15.1171	8.4851e-16
	0.01558	15.2508	8.55933e-16
	0.01557	15.3846	8.63355e-16
	0.01557	15.5184	8.70778e-16
	0.01556	15.6522	8.782e-16
	0.01556	15.7859	8.85623e-16
	0.01555	15.9197	8.93045e-16
	0.01554	16.0535	9.00468e-16
	0.01554	16.1873	9.0789e-16
	0.01553	16.3211	9.15313e-16
	0.01552	16.4549	9.22735e-16
	0.01552	16.5886	9.30158e-16
	0.01551	16.7224	9.3758e-16
	0.01551	16.8562	9.45003e-16
	0.0155	16.99	9.52425e-16
	0.01549	17.1238	9.59848e-16
	0.01549	17.2575	9.6727e-16
	0.01548	17.3913	9.74693e-16
	0.01548	17.5251	9.82115e-16
	0.01547	17.6589	9.89538e-16
	0.01546	17.7926	9.9696e-16
	0.01546	17.9264	1.00438e-15
	0.01545	18.0602	1.01181e-15
	0.01544	18.194	1.01923e-15
	0.01544	18.3278	1.02665e-15
	0.01543	18.4615	1.03407e-15
	0.01543	18.5953	1.0415e-15
	0.01542	18.7291	1.04892e-15
	0.01541	18.8629	1.05634e-15
	0.01541	18.9967	1.06376e-15
	0.0154	19.1304	1.07119e-15
	0.01539	19.2642	1.07861e-15
	0.01539	19.398	1.08603e-15
	0.01538	19.5318	1.09345e-15
	0.01538	19.6655	1.10088e-15
	0.01537	19.7993	1.1083e-15
	0.01536	19.9331	1.11572e-15
	0.01536	20.0669	1.12314e-15
	0.01535	20.2007	1.13057e-15
	0.01534	20.3345	1.13799e-15
	0.01534	20.4682	1.14541e-15
	0.01533	20.602	1.15283e-15
	0.01533	20.7358	1.16026e-15
	0.01532	20.8696	1.16768e-15
	0.01531	21.0033	1.1751e-15
	0.01531	21.1371	1.18252e-15
	0.0153	21.2709	1.18995e-15
	0.01529	21.4047	1.19737e-15
	0.01529	21.5385	1.20479e-15
	0.01528	21.6722	1.21221e-15
	0.01528	21.806	1.21964e-15
	0.01527	21.9398	1.22706e-15
	0.01526	22.0736	1.23448e-15
	0.01526	22.2074	1.2419e-15
	0.01525	22.3411	1.24933e-15
	0.01524	22.4749	1.25675e-15
	0.01524	22.6087	1.26417e-15
	0.01523	22.7425	1.27159e-15
	0.01523	22.8762	1.27902e-15
	0.01522	23.01	1.28644e-15
	0.01521	23.1438	1.29386e-15
	0.01521	23.2776	1.30128e-15
	0.0152	23.4114	1.30871e-15
	0.01519	23.5451	1.31613e-15
	0.01519	23.6789	1.32355e-15
	0.01518	23.8127	1.33097e-15
	0.01518	23.9465	1.3384e-15
	0.01517	24.0803	1.34582e-15
	0.01516	24.2141	1.35324e-15
	0.01516	24.3478	1.36066e-15
	0.01515	24.4816	1.36809e-15
	0.01515	24.6154	1.37551e-15
	0.01514	24.7492	1.38293e-15
	0.01513	24.8829	1.39035e-15
	0.01513	25.0167	1.39778e-15
	0.01512	25.1505	1.4052e-15
	0.01511	25.2843	1.41262e-15
	0.01511	25.4181	1.42004e-15
	0.0151	25.5518	1.42747e-15
	0.0151	25.6856	1.43489e-15
	0.01509	25.8194	1.44231e-15
	0.01508	25.9532	1.44973e-15
	0.01508	26.087	1.45716e-15
	0.01507	26.2207	1.46458e-15
	0.01506	26.3545	1.472e-15
	0.01506	26.4883	1.47942e-15
	0.01505	26.6221	1.48685e-15
	0.01505	26.7558	1.49427e-15
	0.01504	26.8896	1.50169e-15
	0.01503	27.0234	1.50911e-15
	0.01503	27.1572	1.51654e-15
	0.01502	27.291	1.52396e-15
	0.01501	27.4247	1.53138e-15
	0.01501	27.5585	1.5388e-15
	0.015	27.6923	1.54623e-15
	0.015	27.8261	1.55365e-15
	0.01499	27.9599	1.56107e-15
	0.01498	28.0937	1.56849e-15
	0.01498	28.2274	1.57592e-15
	0.01497	28.3612	1.58334e-15
	0.01496	28.495	1.59076e-15
	0.01496	28.6288	1.59818e-15
	0.01495	28.7625	1.60561e-15
	0.01495	28.8963	1.61303e-15
	0.01494	29.0301	1.62045e-15
	0.01493	29.1639	1.62787e-15
	0.01493	29.2977	1.6353e-15
	0.01492	29.4314	1.64272e-15
	0.01491	29.5652	1.65014e-15
	0.01491	29.699	1.65756e-15
	0.0149	29.8328	1.66499e-15
	0.0149	29.9666	1.67241e-15
	0.01489	30.1003	1.67983e-15
	0.01488	30.2341	1.68725e-15
	0.01488	30.3679	1.69468e-15
	0.01487	30.5017	1.7021e-15
	0.01486	30.6354	1.70952e-15
	0.01486	30.7692	1.71694e-15
	0.01485	30.903	1.72437e-15
	0.01485	31.0368	1.73179e-15
	0.01484	31.1706	1.73921e-15
	0.01483	31.3043	1.74663e-15
	0.01483	31.4381	1.75406e-15
	0.01482	31.5719	1.76148e-15
	0.01481	31.7057	1.7689e-15
	0.01481	31.8395	1.77632e-15
	0.0148	31.9732	1.78375e-15
	0.0148	32.107	1.79117e-15
	0.01479	32.2408	1.79859e-15
	0.01478	32.3746	1.80601e-15
	0.01478	32.5084	1.81344e-15
	0.01477	32.6421	1.82086e-15
	0.01477	32.7759	1.82828e-15
	0.01476	32.9097	1.8357e-15
	0.01475	33.0435	1.84313e-15
	0.01475	33.1773	1.85055e-15
	0.01474	33.311	1.85797e-15
	0.01473	33.4448	1.86539e-15
	0.01473	33.5786	1.87282e-15
	0.01472	33.7124	1.88024e-15
	0.01472	33.8462	1.88766e-15
	0.01471	33.9799	1.89508e-15
	0.0147	34.1137	1.90251e-15
	0.0147	34.2475	1.90993e-15
	0.01469	34.3813	1.91735e-15
	0.01468	34.5151	1.92477e-15
	0.01468	34.6488	1.9322e-15
	0.01467	34.7826	1.93962e-15
	0.01467	34.9164	1.94704e-15
	0.01466	35.0502	1.95446e-15
	0.01465	35.184	1.96189e-15
	0.01465	35.3177	1.96931e-15
	0.01464	35.4515	1.97673e-15
	0.01463	35.5853	1.98415e-15
	0.01463	35.7191	1.99158e-15
	0.01462	35.8528	1.999e-15
	0.01462	35.9866	2.00642e-15
	0.01461	36.1204	2.01384e-15
	0.0146	36.2542	2.02127e-15
	0.0146	36.388	2.02869e-15
	0.01459	36.5217	2.03611e-15
	0.01458	36.6555	2.04353e-15
	0.01458	36.7893	2.05096e-15
	0.01457	36.9231	2.05838e-15
	0.01457	37.0569	2.0658e-15
	0.01456	37.1906	2.07322e-15
	0.01455	37.3244	2.08065e-15
	0.01455	37.4582	2.08807e-15
	0.01454	37.592	2.09549e-15
	0.01453	37.7257	2.10291e-15
	0.01453	37.8595	2.11034e-15
	0.01452	37.9933	2.11776e-15
	0.01452	38.1271	2.12518e-15
	0.01451	38.2609	2.84347e-15
	0.0145	38.3946	2.85337e-15
	0.0145	38.5284	2.86327e-15
	0.01449	38.6622	2.87316e-15
	0.01448	38.796	2.88306e-15
	0.01448	38.9298	2.89296e-15
	0.01447	39.0635	2.90285e-15
	0.01447	39.1973	2.91275e-15
	0.01446	39.3311	2.92265e-15
	0.01445	39.4649	2.93254e-15
	0.01445	39.5987	2.94244e-15
	0.01444	39.7324	2.95234e-15
	0.01444	39.8662	2.96223e-15
	0.01443	40	2.97213e-15
	0.01955	0	1.17199e-17
	0.01954	0.13378	1.91417e-17
	0.01953	0.26756	2.65635e-17
	0.01953	0.40134	3.39852e-17
	0.01952	0.53512	4.1407e-17
	0.01951	0.6689	4.88288e-17
	0.0195	0.80268	5.62505e-17
	0.0195	0.93645	6.36723e-17
	0.01949	1.07023	7.1094e-17
	0.01948	1.20401	7.85158e-17
	0.01947	1.33779	8.59376e-17
	0.01947	1.47157	9.33593e-17
	0.01946	1.60535	1.00781e-16
	0.01945	1.73913	1.08203e-16
	0.01944	1.87291	1.15625e-16
	0.01944	2.00669	1.23046e-16
	0.01943	2.14047	1.30468e-16
	0.01942	2.27425	1.3789e-16
	0.01941	2.40803	1.45312e-16
	0.01941	2.54181	1.52733e-16
	0.0194	2.67559	1.60155e-16
	0.01939	2.80936	1.67577e-16
	0.01938	2.94314	1.74999e-16
	0.01938	3.07692	1.8242e-16
	0.01937	3.2107	1.89842e-16
	0.01936	3.34448	1.97264e-16
	0.01935	3.47826	2.04686e-16
	0.01935	3.61204	2.12108e-16
	0.01934	3.74582	2.19529e-16
	0.01933	3.8796	2.26951e-16
	0.01932	4.01338	2.34373e-16
	0.01932	4.14716	2.41795e-16
	0.01931	4.28094	2.49216e-16
	0.0193	4.41472	2.56638e-16
	0.01929	4.54849	2.6406e-16
	0.01929	4.68227	2.71482e-16
	0.01928	4.81605	2.78903e-16
	0.01927	4.94983	2.86325e-16
	0.01926	5.08361	2.93747e-16
	0.01926	5.21739	3.01169e-16
	0.01925	5.35117	3.0859e-16
	0.01924	5.48495	3.16012e-16
	0.01924	5.61873	3.23434e-16
	0.01923	5.75251	3.30856e-16
	0.01922	5.88629	3.38277e-16
	0.01921	6.02007	3.45699e-16
	0.01921	6.15385	3.53121e-16
	0.0192	6.28763	3.60543e-16
	0.01919	6.4214	3.67964e-16
	0.01918	6.55518	3.75386e-16
	0.01918	6.68896	3.82808e-16
	0.01917	6.82274	3.9023e-16
	0.01916	6.95652	3.97652e-16
	0.01915	7.0903	4.05073e-16
	0.01915	7.22408	4.12495e-16
	0.01914	7.35786	4.19917e-16
	0.01913	7.49164	4.27339e-16
	0.01912	7.62542	4.3476e-16
	0.01912	7.7592	4.42182e-16
	0.01911	7.89298	4.49604e-16
	0.0191	8.02676	4.57026e-16
	0.01909	8.16054	4.64447e-16
	0.01909	8.29431	4.71869e-16
	0.01908	8.42809	4.79291e-16
	0.01907	8.56187	4.86713e-16
	0.01906	8.69565	4.94134e-16
	0.01906	8.82943	5.01556e-16
	0.01905	8.96321	5.08978e-16
	0.01904	9.09699	5.164e-16
	0.01903	9.23077	5.23821e-16
	0.01903	9.36455	5.31243e-16
	0.01902	9.49833	5.38665e-16
	0.01901	9.63211	5.46087e-16
	0.019	9.76589	5.53509e-16
	0.019	9.89967	5.6093e-16
	0.01899	10.0334	5.68352e-16
	0.01898	10.1672	5.75774e-16
	0.01897	10.301	5.83196e-16
	0.01897	10.4348	5.90617e-16
	0.01896	10.5686	5.98039e-16
	0.01895	10.7023	6.05461e-16
	0.01894	10.8361	6.12883e-16
	0.01894	10.9699	6.20304e-16
	0.01893	11.1037	6.27726e-16
	0.01892	11.2375	6.35148e-16
	0.01891	11.3712	6.4257e-16
	0.01891	11.505	6.49991e-16
	0.0189	11.6388	6.57413e-16
	0.01889	11.7726	6.64835e-16
	0.01888	11.9063	6.72257e-16
	0.01888	12.0401	6.79678e-16
	0.01887	12.1739	6.871e-16
	0.01886	12.3077	6.94522e-16
	0.01885	12.4415	7.01944e-16
	0.01885	12.5753	7.09366e-16
	0.01884	12.709	7.16787e-16
	0.01883	12.8428	7.24209e-16
	0.01882	12.9766	7.31631e-16
	0.01882	13.1104	7.39053e-16
	0.01881	13.2441	7.46474e-16
	0.0188	13.3779	1.00519e-15
	0.01879	13.5117	1.01509e-15
	0.01879	13.6455	1.02499e-15
	0.01878	13.7793	1.03488e-15
	0.01877	13.913	1.04478e-15
	0.01876	14.0468	1.05467e-15
	0.01876	14.1806	1.06457e-15
	0.01875	14.3144	1.07446e-15
	0.01874	14.4482	1.08436e-15
	0.01873	14.5819	1.09426e-15
	0.01873	14.7157	1.10415e-15
	0.01872	14.8495	1.11405e-15
	0.01871	14.9833	1.12394e-15
	0.0187	15.1171	1.13384e-15
	0.0187	15.2508	1.14373e-15
	0.01869	15.3846	1.15363e-15
	0.01868	15.5184	1.16353e-15
	0.01867	15.6522	1.17342e-15
	0.01867	15.7859	1.18332e-15
	0.01866	15.9197	1.19321e-15
	0.01865	16.0535	1.20311e-15
	0.01864	16.1873	1.213e-15
	0.01864	16.3211	1.2229e-15
	0.01863	16.4549	1.2328e-15
	0.01862	16.5886	1.24269e-15
	0.01861	16.7224	1.25259e-15
	0.01861	16.8562	1.26248e-15
	0.0186	16.99	1.27238e-15
	0.01859	17.1238	1.28227e-15
	0.01858	17.2575	1.29217e-15
	0.01858	17.3913	1.30207e-15
	0.01857	17.5251	1.31196e-15
	0.01856	17.6589	1.32186e-15
	0.01856	17.7926	1.33175e-15
	0.01855	17.9264	1.34165e-15
	0.01854	18.0602	1.35154e-15
	0.01853	18.194	1.36144e-15
	0.01853	18.3278	1.37133e-15
	0.01852	18.4615	1.38123e-15
	0.01851	18.5953	1.39113e-15
	0.0185	18.7291	1.40102e-15
	0.0185	18.8629	1.41092e-15
	0.01849	18.9967	1.42081e-15
	0.01848	19.1304	1.43071e-15
	0.01847	19.2642	1.4406e-15
	0.01847	19.398	1.4505e-15
	0.01846	19.5318	1.4604e-15
	0.01845	19.6655	1.47029e-15
	0.01844	19.7993	1.48019e-15
	0.01844	19.9331	1.49008e-15
	0.01843	20.0669	1.49998e-15
	0.01842	20.2007	1.50987e-15
	0.01841	20.3345	1.51977e-15
	0.01841	20.4682	1.52967e-15
	0.0184	20.602	1.53956e-15
	0.01839	20.7358	1.54946e-15
	0.01838	20.8696	1.55935e-15
	0.01838	21.0033	1.56925e-15
	0.01837	21.1371	1.57914e-15
	0.01836	21.2709	1.58904e-15
	0.01835	21.4047	1.59894e-15
	0.01835	21.5385	1.60883e-15
	0.01834	21.6722	1.61873e-15
	0.01833	21.806	1.62862e-15
	0.01832	21.9398	1.63852e-15
	0.01832	22.0736	1.64841e-15
	0.01831	22.2074	1.65831e-15
	0.0183	22.3411	1.66821e-15
	0.01829	22.4749	1.6781e-15
	0.01829	22.6087	1.688e-15
	0.01828	22.7425	1.69789e-15
	0.01827	22.8762	1.70779e-15
	0.01826	23.01	1.71768e-15
	0.01826	23.1438	1.72758e-15
	0.01825	23.2776	1.73748e-15
	0.01824	23.4114	1.74737e-15
	0.01823	23.5451	1.75727e-15
	0.01823	23.6789	1.76716e-15
	0.01822	23.8127	1.77706e-15
	0.01821	23.9465	1.78695e-15
	0.0182	24.0803	1.79685e-15
	0.0182	24.2141	1.80674e-15
	0.01819	24.3478	1.81664e-15
	0.01818	24.4816	1.82654e-15
	0.01817	24.6154	1.83643e-15
	0.01817	24.7492	1.84633e-15
	0.01816	24.8829	1.85622e-15
	0.01815	25.0167	1.86612e-15
	0.01814	25.1505	1.87601e-15
	0.01814	25.2843	1.88591e-15
	0.01813	25.4181	1.89581e-15
	0.01812	25.5518	1.9057e-15
	0.01811	25.6856	1.9156e-15
	0.01811	25.8194	1.92549e-15
	0.0181	25.9532	1.93539e-15
	0.01809	26.087	1.94528e-15
[truncated: 118,004 more rows]

## Sheet: Fig. 3B
	Theoretical results				Experimental data
	w=0		w=32*		w=0		w=32*
	Obtained from analytical results combining Eqs. S70 and S160				Reference: Nature 528, 99-104 (2015)
	Growth rate (1/h)	Jacetate (mM /OD600/h)	Growth rate (1/h)	Jacetate (mM /OD600/h)	Growth rate (1/h)	Jacetate† (mM /OD600/h)	Growth rate (1/h)	Jacetate† (mM /OD600/h)
	0	0	0	5.92119e-16	0.52	-0.08	0.49	0.75
	0.0101	4.03717e-18	0.00641	5.934e-16	0.66	0.01	0.56	1.84
	0.0202	1.21115e-17	0.01282	1.78404e-15	0.7	-0.05	0.63	2.21
	0.0303	4.23903e-17	0.01923	2.9798e-15	0.77	0.6	0.67	2.68
	0.0404	1.21115e-16	0.02563	5.97242e-15	0.87	1.49	0.66	2.89
	0.05051	3.02788e-16	0.03204	1.07734e-14	0.94	1.95
	0.06061	7.63026e-16	0.03845	2.03933e-14
	0.07071	1.83691e-15	0.04486	3.84694e-14
	0.08081	4.26326e-15	0.05127	7.16813e-14
	0.09091	9.68316e-15	0.05768	1.32802e-13			* This value of the energy dissipation coefficient was fitted from experimental data
	0.10101	2.15585e-14	0.06408	2.43785e-13
	0.11111	4.71179e-14	0.07049	4.45562e-13
	0.12121	1.01277e-13	0.0769	8.08565e-13
	0.13131	2.1442e-13	0.08331	1.46043e-12
	0.14141	4.47614e-13	0.08972	2.62016e-12
	0.15152	9.2202e-13	0.09613	4.673e-12
	0.16162	1.87532e-12	0.10254	8.28432e-12
	0.17172	3.76827e-12	0.10894	1.45965e-11			† Engauge Digitizer 11.1 was used to extract the experimental data from the plots of the reference study.
	0.18182	7.48412e-12	0.11535	2.55616e-11
	0.19192	1.46971e-11	0.12176	4.44936e-11
	0.20202	2.85468e-11	0.12817	7.69781e-11
	0.21212	5.48574e-11	0.13458	1.32372e-10
	0.22222	1.0432e-10	0.14099	2.26251e-10
	0.23232	1.96359e-10	0.14739	3.84368e-10
	0.24242	3.65893e-10	0.1538	6.49037e-10
	0.25253	6.75075e-10	0.16021	1.08933e-09
	0.26263	1.2334e-09	0.16662	1.81724e-09
	0.27273	2.23187e-09	0.17303	3.01327e-09
	0.28283	4.00028e-09	0.17944	4.96629e-09
	0.29293	7.10257e-09	0.18585	8.13575e-09
	0.30303	1.24935e-08	0.19225	1.32476e-08
	0.31313	2.17738e-08	0.19866	2.14412e-08
	0.32323	3.76008e-08	0.20507	3.44936e-08
	0.33333	6.43434e-08	0.21148	5.51575e-08
	0.34343	1.09115e-07	0.21789	8.76698e-08
	0.35354	1.83385e-07	0.2243	1.38508e-07
	0.36364	3.05468e-07	0.2307	2.17513e-07
	0.37374	5.0433e-07	0.23711	3.39529e-07
	0.38384	8.25338e-07	0.24352	5.26813e-07
	0.39394	1.33887e-06	0.24993	8.125e-07
	0.40404	2.15303e-06	0.25634	1.24561e-06
	0.41414	3.43233e-06	0.26275	1.89815e-06
	0.42424	5.42464e-06	0.26915	2.87523e-06
	0.43434	8.49987e-06	0.27556	4.32925e-06
	0.44444	1.32047e-05	0.28197	6.47966e-06
	0.45455	2.03394e-05	0.28838	9.64033e-06
	0.46465	3.10637e-05	0.29479	1.42572e-05
	0.47475	4.70423e-05	0.3012	2.09597e-05
	0.48485	7.06414e-05	0.30761	3.06298e-05
	0.49495	0.000105191	0.31401	4.44954e-05
	0.50505	0.000155333	0.32042	6.42541e-05
	0.51515	0.00022747	0.32683	9.22367e-05
	0.52525	0.000330352	0.33324	0.000131622
	0.53535	0.000475809	0.33965	0.000186713
	0.54545	0.000679685	0.34606	0.0002633
	0.55556	0.000962972	0.35246	0.000369111
	0.56566	0.00135	0.35887	0.000514397
	0.57576	0.00189	0.36528	0.000712654
	0.58586	0.00261	0.37169	0.000981524
	0.59596	0.00358	0.3781	0.00134
	0.60606	0.00487	0.38451	0.00183
	0.61616	0.00657	0.39092	0.00248
	0.62626	0.00879	0.39732	0.00333
	0.63636	0.01168	0.40373	0.00445
	0.64646	0.01539	0.41014	0.00592
	0.65657	0.02012	0.41655	0.00783
	0.66667	0.0261	0.42296	0.01029
	0.67677	0.0336	0.42937	0.01345
	0.68687	0.04292	0.43577	0.01748
	0.69697	0.0544	0.44218	0.02258
	0.70707	0.06843	0.44859	0.029
	0.71717	0.08543	0.455	0.03704
	0.72727	0.10585	0.46141	0.04704
	0.73737	0.13018	0.46782	0.05939
	0.74747	0.15892	0.47423	0.07457
	0.75758	0.19258	0.48063	0.09309
	0.76768	0.23169	0.48704	0.11557
	0.77778	0.27673	0.49345	0.14268
	0.78788	0.32817	0.49986	0.17516
	0.79798	0.38645	0.50627	0.21384
	0.80808	0.45192	0.51268	0.25963
	0.81818	0.52486	0.51908	0.31349
	0.82828	0.60546	0.52549	0.37647
	0.83838	0.69379	0.5319	0.44963
	0.84848	0.78979	0.53831	0.53413
	0.85859	0.89329	0.54472	0.6311
	0.86869	1.00398	0.55113	0.7417
	0.87879	1.12139	0.55754	0.86707
	0.88889	1.24495	0.56394	1.00832
	0.89899	1.37394	0.57035	1.16647
	0.90909	1.50756	0.57676	1.34247
	0.91919	1.64488	0.58317	1.53711
	0.92929	1.78494	0.58958	1.75105
	0.93939	1.9267	0.59599	1.98477
	0.94949	2.06912	0.60239	2.23852
	0.9596	2.21117	0.6088	2.51234
	0.9697	2.35183	0.61521	2.80599
	0.9798	2.49015	0.62162	3.119
	0.9899	2.62526	0.62803	3.45059
	1	2.75639	0.63444	3.79972

## Sheet: Fig. 3C
	Theoretical results			Experimental data
				0 μm CM (ι=0)			2 μm CM (ι=1.05*)			4 μm CM (ι=2.00*)			8 μm CM (ι=5.40*)
	Obtained from analytical results combining Eqs. S85 and S160			Reference: Nature 528, 99-104 (2015)
	Growth rate (1/h)	Translation efficiency 1/(ι+1)	Jacetate (mM /OD600/h)	Growth rate (1/h)	Translation efficiency 1/(ι+1)	Jacetate (mM /OD600/h)	Growth rate (1/h)	Translation efficiency 1/(ι+1)	Jacetate (mM /OD600/h)	Growth rate (1/h)	Translation efficiency 1/(ι+1)	Jacetate (mM /OD600/h)	Growth rate (1/h)	Translation efficiency 1/(ι+1)	Jacetate (mM /OD600/h)
	0	1	4.68166e-17	0.35	1	-0.01	0.49	0.49	-0.02	0.45	0.33	-0.17	0.27	0.15	0
	0	0.99666	4.68166e-17	0.55	1	-0.01	0.55	0.49	-0.01	0.5	0.33	0.7	0.31	0.15	0.76
	0	0.99331	4.68166e-17	0.65	1	-0.01	0.6	0.49	0.12	0.58	0.33	1.58	0.36	0.15	1.44
	0	0.98997	4.68166e-17	0.76	1	-0.01	0.68	0.49	1.35	0.61	0.33	2.05	0.39	0.15	1.6
	0	0.98662	4.68166e-17	0.87	1	0.96	0.7	0.49	1.61	0.62	0.33	2.18	0.4	0.15	1.86
	0	0.98328	4.68166e-17	0.92	1	2.3	0.74	0.49	2.25
	0	0.97993	4.68166e-17	1.03	1	2.84
	0	0.97659	4.68166e-17	1.16	1	4.15
	0	0.97324	4.68166e-17
	0	0.9699	4.68166e-17
	0	0.96656	4.68166e-17							* These values of the inhibition coefficient were fitted from experimental data
	0	0.96321	4.68166e-17
	0	0.95987	4.68166e-17
	0	0.95652	4.68166e-17
	0	0.95318	4.68166e-17
	0	0.94983	4.68166e-17
	0	0.94649	4.68166e-17
	0	0.94314	4.68166e-17
	0	0.9398	4.68166e-17
	0	0.93645	4.68166e-17
	0	0.93311	4.68166e-17
	0	0.92977	4.68166e-17
	0	0.92642	4.68166e-17
	0	0.92308	4.68166e-17
	0	0.91973	4.68166e-17
	0	0.91639	4.68166e-17
	0	0.91304	4.68166e-17
	0	0.9097	4.68166e-17
	0	0.90635	4.68166e-17
	0	0.90301	4.68166e-17
	0	0.89967	4.68166e-17
	0	0.89632	4.68166e-17
	0	0.89298	4.68166e-17
	0	0.88963	4.68166e-17
	0	0.88629	4.68166e-17
	0	0.88294	4.68166e-17
	0	0.8796	4.68166e-17
	0	0.87625	4.68166e-17
	0	0.87291	4.68166e-17
	0	0.86957	4.68166e-17
	0	0.86622	4.68166e-17
	0	0.86288	4.68166e-17
	0	0.85953	4.68166e-17
	0	0.85619	4.68166e-17
	0	0.85284	4.68166e-17
	0	0.8495	4.68166e-17
	0	0.84615	4.68166e-17
	0	0.84281	4.68166e-17
	0	0.83946	4.68166e-17
	0	0.83612	4.68166e-17
	0	0.83278	4.68166e-17
	0	0.82943	4.68166e-17
	0	0.82609	4.68166e-17
	0	0.82274	4.68166e-17
	0	0.8194	4.68166e-17
	0	0.81605	4.68166e-17
	0	0.81271	4.68166e-17
	0	0.80936	4.68166e-17
	0	0.80602	4.68166e-17
	0	0.80268	4.68166e-17
	0	0.79933	4.68166e-17
	0	0.79599	4.68166e-17
	0	0.79264	4.68166e-17
	0	0.7893	4.68166e-17
	0	0.78595	4.68166e-17
	0	0.78261	4.68166e-17
	0	0.77926	4.68166e-17
	0	0.77592	4.68166e-17
	0	0.77258	4.68166e-17
	0	0.76923	4.68166e-17
	0	0.76589	4.68166e-17
	0	0.76254	4.68166e-17
	0	0.7592	4.68166e-17
	0	0.75585	4.68166e-17
	0	0.75251	4.68166e-17
	0	0.74916	4.68166e-17
	0	0.74582	4.68166e-17
	0	0.74247	4.68166e-17
	0	0.73913	4.68166e-17
	0	0.73579	4.68166e-17
	0	0.73244	4.68166e-17
	0	0.7291	4.68166e-17
	0	0.72575	4.68166e-17
	0	0.72241	4.68166e-17
	0	0.71906	4.68166e-17
	0	0.71572	4.68166e-17
	0	0.71237	4.68166e-17
	0	0.70903	4.68166e-17
	0	0.70569	4.68166e-17
	0	0.70234	4.68166e-17
	0	0.699	4.68166e-17
	0	0.69565	4.68166e-17
	0	0.69231	4.68166e-17
	0	0.68896	4.68166e-17
	0	0.68562	4.68166e-17
	0	0.68227	4.68166e-17
	0	0.67893	4.68166e-17
	0	0.67559	4.68166e-17
	0	0.67224	4.68166e-17
	0	0.6689	4.68166e-17
	0	0.66555	4.68166e-17
	0	0.66221	4.68166e-17
	0	0.65886	4.68166e-17
	0	0.65552	4.68166e-17
	0	0.65217	4.68166e-17
	0	0.64883	4.68166e-17
	0	0.64548	4.68166e-17
	0	0.64214	4.68166e-17
	0	0.6388	4.68166e-17
	0	0.63545	4.68166e-17
	0	0.63211	4.68166e-17
	0	0.62876	4.68166e-17
	0	0.62542	4.68166e-17
	0	0.62207	4.68166e-17
	0	0.61873	4.68166e-17
	0	0.61538	4.68166e-17
	0	0.61204	4.68166e-17
	0	0.6087	4.68166e-17
	0	0.60535	4.68166e-17
	0	0.60201	4.68166e-17
	0	0.59866	4.68166e-17
	0	0.59532	4.68166e-17
	0	0.59197	4.68166e-17
	0	0.58863	4.68166e-17
	0	0.58528	4.68166e-17
	0	0.58194	4.68166e-17
	0	0.5786	4.68166e-17
	0	0.57525	4.68166e-17
	0	0.57191	4.68166e-17
	0	0.56856	4.68166e-17
	0	0.56522	4.68166e-17
	0	0.56187	4.68166e-17
	0	0.55853	4.68166e-17
	0	0.55518	4.68166e-17
	0	0.55184	4.68166e-17
	0	0.5485	4.68166e-17
	0	0.54515	4.68166e-17
	0	0.54181	4.68166e-17
	0	0.53846	4.68166e-17
	0	0.53512	4.68166e-17
	0	0.53177	4.68166e-17
	0	0.52843	4.68166e-17
	0	0.52508	4.68166e-17
	0	0.52174	4.68166e-17
	0	0.51839	4.68166e-17
	0	0.51505	4.68166e-17
	0	0.51171	4.68166e-17
	0	0.50836	4.68166e-17
	0	0.50502	4.68166e-17
	0	0.50167	4.68166e-17
	0	0.49833	4.68166e-17
	0	0.49498	4.68166e-17
	0	0.49164	4.68166e-17
	0	0.48829	4.68166e-17
	0	0.48495	4.68166e-17
	0	0.48161	4.68166e-17
	0	0.47826	4.68166e-17
	0	0.47492	4.68166e-17
	0	0.47157	4.68166e-17
	0	0.46823	4.68166e-17
	0	0.46488	4.68166e-17
	0	0.46154	4.68166e-17
	0	0.45819	4.68166e-17
	0	0.45485	4.68166e-17
	0	0.45151	4.68166e-17
	0	0.44816	4.68166e-17
	0	0.44482	4.68166e-17
	0	0.44147	4.68166e-17
	0	0.43813	4.68166e-17
	0	0.43478	4.68166e-17
	0	0.43144	4.68166e-17
	0	0.42809	4.68166e-17
	0	0.42475	4.68166e-17
	0	0.4214	4.68166e-17
	0	0.41806	4.68166e-17
	0	0.41472	4.68166e-17
	0	0.41137	4.68166e-17
	0	0.40803	4.68166e-17
	0	0.40468	4.68166e-17
	0	0.40134	4.68166e-17
	0	0.39799	4.68166e-17
	0	0.39465	4.68166e-17
	0	0.3913	4.68166e-17
	0	0.38796	4.68166e-17
	0	0.38462	4.68166e-17
	0	0.38127	4.68166e-17
	0	0.37793	4.68166e-17
	0	0.37458	4.68166e-17
	0	0.37124	4.68166e-17
	0	0.36789	4.68166e-17
	0	0.36455	4.68166e-17
	0	0.3612	4.68166e-17
	0	0.35786	4.68166e-17
	0	0.35452	4.68166e-17
	0	0.35117	4.68166e-17
	0	0.34783	4.68166e-17
	0	0.34448	4.68166e-17
	0	0.34114	4.68166e-17
	0	0.33779	4.68166e-17
	0	0.33445	4.68166e-17
	0	0.3311	4.68166e-17
	0	0.32776	4.68166e-17
	0	0.32441	4.68166e-17
	0	0.32107	4.68166e-17
	0	0.31773	4.68166e-17
	0	0.31438	4.68166e-17
	0	0.31104	4.68166e-17
	0	0.30769	4.68166e-17
	0	0.30435	4.68166e-17
	0	0.301	4.68166e-17
	0	0.29766	4.68166e-17
	0	0.29431	4.68166e-17
	0	0.29097	4.68166e-17
	0	0.28763	4.68166e-17
	0	0.28428	4.68166e-17
	0	0.28094	4.68166e-17
	0	0.27759	4.68166e-17
	0	0.27425	4.68166e-17
	0	0.2709	4.68166e-17
	0	0.26756	4.68166e-17
	0	0.26421	4.68166e-17
	0	0.26087	4.68166e-17
	0	0.25753	4.68166e-17
	0	0.25418	4.68166e-17
	0	0.25084	4.68166e-17
	0	0.24749	4.68166e-17
	0	0.24415	4.68166e-17
	0	0.2408	4.68166e-17
	0	0.23746	4.68166e-17
	0	0.23411	4.68166e-17
	0	0.23077	4.68166e-17
	0	0.22742	4.68166e-17
	0	0.22408	4.68166e-17
	0	0.22074	4.68166e-17
	0	0.21739	4.68166e-17
	0	0.21405	4.68166e-17
	0	0.2107	4.68166e-17
	0	0.20736	4.68166e-17
	0	0.20401	4.68166e-17
	0	0.20067	4.68166e-17
	0	0.19732	4.68166e-17
	0	0.19398	4.68166e-17
	0	0.19064	4.68166e-17
	0	0.18729	4.68166e-17
	0	0.18395	4.68166e-17
	0	0.1806	4.68166e-17
	0	0.17726	4.68166e-17
	0	0.17391	4.68166e-17
	0	0.17057	4.68166e-17
	0	0.16722	4.68166e-17
	0	0.16388	4.68166e-17
	0	0.16054	4.68166e-17
	0	0.15719	4.68166e-17
	0	0.15385	4.68166e-17
	0	0.1505	4.68166e-17
	0	0.14716	4.68166e-17
	0	0.14381	4.68166e-17
	0	0.14047	4.68166e-17
	0	0.13712	4.68166e-17
	0	0.13378	4.68166e-17
	0	0.13043	4.68166e-17
	0	0.12709	4.68166e-17
	0	0.12375	4.68166e-17
	0	0.1204	4.68166e-17
	0	0.11706	4.68166e-17
	0	0.11371	4.68166e-17
	0	0.11037	4.68166e-17
	0	0.10702	4.68166e-17
	0	0.10368	4.68166e-17
	0	0.10033	4.68166e-17
	0	0.09699	4.68166e-17
	0	0.09365	4.68166e-17
	0	0.0903	4.68166e-17
	0	0.08696	4.68166e-17
	0	0.08361	4.68166e-17
	0	0.08027	4.68166e-17
	0	0.07692	4.68166e-17
	0	0.07358	4.68166e-17
	0	0.07023	4.68166e-17
	0	0.06689	4.68166e-17
	0	0.06355	4.68166e-17
	0	0.0602	4.68166e-17
	0	0.05686	4.68166e-17
	0	0.05351	4.68166e-17
	0	0.05017	4.68166e-17
	0	0.04682	4.68166e-17
	0	0.04348	4.68166e-17
	0	0.04013	4.68166e-17
	0	0.03679	4.68166e-17
	0	0.03344	4.68166e-17
	0	0.0301	4.68166e-17
	0	0.02676	4.68166e-17
	0	0.02341	4.68166e-17
	0	0.02007	4.68166e-17
	0	0.01672	4.68166e-17
	0	0.01338	4.68166e-17
	0	0.01003	4.68166e-17
	0	0.00669	4.68166e-17
	0	0.00334	4.68166e-17
	0	1e-07	4.68166e-17
	0.00326	1	4.73231e-17
	0.00325	0.99666	4.73224e-17
	0.00325	0.99331	4.73217e-17
	0.00324	0.98997	4.7321e-17
	0.00324	0.98662	4.73203e-17
	0.00324	0.98328	4.73196e-17
	0.00323	0.97993	4.73189e-17
	0.00323	0.97659	4.73182e-17
	0.00322	0.97324	4.73174e-17
	0.00322	0.9699	4.73167e-17
	0.00321	0.96656	4.7316e-17
	0.00321	0.96321	4.73153e-17
	0.0032	0.95987	4.73146e-17
	0.0032	0.95652	4.73139e-17
	0.00319	0.95318	4.73131e-17
	0.00319	0.94983	4.73124e-17
	0.00318	0.94649	4.73117e-17
	0.00318	0.94314	4.73109e-17
	0.00318	0.9398	4.73102e-17
	0.00317	0.93645	4.73094e-17
	0.00317	0.93311	4.73087e-17
	0.00316	0.92977	4.73079e-17
	0.00316	0.92642	4.73072e-17
	0.00315	0.92308	4.73064e-17
	0.00315	0.91973	4.73057e-17
	0.00314	0.91639	4.73049e-17
	0.00314	0.91304	4.73042e-17
	0.00313	0.9097	4.73034e-17
	0.00313	0.90635	4.73026e-17
	0.00312	0.90301	4.73018e-17
	0.00312	0.89967	4.73011e-17
	0.00311	0.89632	4.73003e-17
	0.00311	0.89298	4.72995e-17
	0.0031	0.88963	4.72987e-17
	0.0031	0.88629	4.72979e-17
	0.00309	0.88294	4.72971e-17
	0.00309	0.8796	4.72963e-17
	0.00308	0.87625	4.72955e-17
	0.00308	0.87291	4.72947e-17
	0.00307	0.86957	4.72939e-17
	0.00307	0.86622	4.72931e-17
	0.00306	0.86288	4.72923e-17
	0.00305	0.85953	4.72915e-17
	0.00305	0.85619	4.72907e-17
	0.00304	0.85284	4.72898e-17
	0.00304	0.8495	4.7289e-17
	0.00303	0.84615	4.72882e-17
	0.00303	0.84281	4.72873e-17
	0.00302	0.83946	4.72865e-17
	0.00302	0.83612	4.72856e-17
	0.00301	0.83278	4.72848e-17
	0.00301	0.82943	4.72839e-17
	0.003	0.82609	4.72831e-17
	0.003	0.82274	4.72822e-17
	0.00299	0.8194	4.72814e-17
	0.00298	0.81605	4.72805e-17
	0.00298	0.81271	4.72796e-17
	0.00297	0.80936	4.72788e-17
	0.00297	0.80602	4.72779e-17
	0.00296	0.80268	4.7277e-17
	0.00296	0.79933	4.72761e-17
	0.00295	0.79599	4.72752e-17
	0.00294	0.79264	4.72743e-17
	0.00294	0.7893	4.72734e-17
	0.00293	0.78595	4.72725e-17
	0.00293	0.78261	4.72716e-17
	0.00292	0.77926	4.72707e-17
	0.00292	0.77592	4.72698e-17
	0.00291	0.77258	4.72689e-17
	0.0029	0.76923	4.7268e-17
	0.0029	0.76589	4.7267e-17
	0.00289	0.76254	4.72661e-17
	0.00289	0.7592	4.72652e-17
	0.00288	0.75585	4.72642e-17
	0.00287	0.75251	4.72633e-17
	0.00287	0.74916	4.72623e-17
	0.00286	0.74582	4.72614e-17
	0.00286	0.74247	4.72604e-17
	0.00285	0.73913	4.72595e-17
	0.00284	0.73579	4.72585e-17
	0.00284	0.73244	4.72575e-17
	0.00283	0.7291	4.72565e-17
	0.00282	0.72575	4.72556e-17
	0.00282	0.72241	4.72546e-17
	0.00281	0.71906	4.72536e-17
	0.0028	0.71572	4.72526e-17
	0.0028	0.71237	4.72516e-17
	0.00279	0.70903	4.72506e-17
	0.00279	0.70569	4.72496e-17
	0.00278	0.70234	4.72486e-17
	0.00277	0.699	4.72475e-17
	0.00277	0.69565	4.72465e-17
	0.00276	0.69231	4.72455e-17
	0.00275	0.68896	4.72445e-17
	0.00275	0.68562	4.72434e-17
	0.00274	0.68227	4.72424e-17
	0.00273	0.67893	4.72413e-17
	0.00273	0.67559	4.72403e-17
	0.00272	0.67224	4.72392e-17
	0.00271	0.6689	4.72381e-17
	0.00271	0.66555	4.72371e-17
	0.0027	0.66221	4.7236e-17
	0.00269	0.65886	4.72349e-17
	0.00268	0.65552	4.72338e-17
	0.00268	0.65217	4.72327e-17
	0.00267	0.64883	4.72316e-17
	0.00266	0.64548	4.72305e-17
	0.00266	0.64214	4.72294e-17
	0.00265	0.6388	4.72283e-17
	0.00264	0.63545	4.72272e-17
	0.00263	0.63211	4.72261e-17
	0.00263	0.62876	4.7225e-17
	0.00262	0.62542	4.72238e-17
	0.00261	0.62207	4.72227e-17
	0.0026	0.61873	4.72215e-17
	0.0026	0.61538	4.72204e-17
	0.00259	0.61204	4.72192e-17
	0.00258	0.6087	4.7218e-17
	0.00258	0.60535	4.72169e-17
	0.00257	0.60201	4.72157e-17
	0.00256	0.59866	4.72145e-17
	0.00255	0.59532	4.72133e-17
	0.00254	0.59197	4.72121e-17
	0.00254	0.58863	4.72109e-17
	0.00253	0.58528	4.72097e-17
	0.00252	0.58194	4.72085e-17
	0.00251	0.5786	4.72073e-17
	0.00251	0.57525	4.7206e-17
	0.0025	0.57191	4.72048e-17
	0.00249	0.56856	4.72036e-17
	0.00248	0.56522	4.72023e-17
	0.00247	0.56187	4.72011e-17
	0.00247	0.55853	4.71998e-17
	0.00246	0.55518	4.71985e-17
	0.00245	0.55184	4.71973e-17
	0.00244	0.5485	4.7196e-17
	0.00243	0.54515	4.71947e-17
	0.00242	0.54181	4.71934e-17
	0.00242	0.53846	4.71921e-17
	0.00241	0.53512	4.71908e-17
	0.0024	0.53177	4.71895e-17
	0.00239	0.52843	4.71881e-17
	0.00238	0.52508	4.71868e-17
	0.00237	0.52174	4.71855e-17
	0.00236	0.51839	4.71841e-17
	0.00236	0.51505	4.71828e-17
	0.00235	0.51171	4.71814e-17
	0.00234	0.50836	4.718e-17
	0.00233	0.50502	4.71787e-17
	0.00232	0.50167	4.71773e-17
	0.00231	0.49833	4.71759e-17
	0.0023	0.49498	4.71745e-17
	0.00229	0.49164	4.71731e-17
	0.00228	0.48829	4.71717e-17
	0.00227	0.48495	4.71702e-17
	0.00227	0.48161	4.71688e-17
	0.00226	0.47826	4.71674e-17
	0.00225	0.47492	4.71659e-17
	0.00224	0.47157	4.71645e-17
	0.00223	0.46823	4.7163e-17
	0.00222	0.46488	4.71615e-17
	0.00221	0.46154	4.716e-17
	0.0022	0.45819	4.71585e-17
	0.00219	0.45485	4.7157e-17
	0.00218	0.45151	4.71555e-17
	0.00217	0.44816	4.7154e-17
	0.00216	0.44482	4.71525e-17
	0.00215	0.44147	4.71509e-17
	0.00214	0.43813	4.71494e-17
	0.00213	0.43478	4.71478e-17
	0.00212	0.43144	4.71463e-17
	0.00211	0.42809	4.71447e-17
	0.0021	0.42475	4.71431e-17
	0.00209	0.4214	4.71415e-17
	0.00208	0.41806	4.71399e-17
	0.00207	0.41472	4.71383e-17
	0.00206	0.41137	4.71367e-17
	0.00205	0.40803	4.71351e-17
	0.00204	0.40468	4.71334e-17
	0.00203	0.40134	4.71318e-17
	0.00202	0.39799	4.71301e-17
	0.00201	0.39465	4.71284e-17
	0.002	0.3913	4.71268e-17
	0.00198	0.38796	4.71251e-17
	0.00197	0.38462	4.71234e-17
	0.00196	0.38127	4.71216e-17
	0.00195	0.37793	4.71199e-17
	0.00194	0.37458	4.71182e-17
	0.00193	0.37124	4.71164e-17
	0.00192	0.36789	4.71147e-17
	0.00191	0.36455	4.71129e-17
	0.00189	0.3612	4.71111e-17
	0.00188	0.35786	4.71093e-17
	0.00187	0.35452	4.71075e-17
	0.00186	0.35117	4.71057e-17
	0.00185	0.34783	4.71039e-17
	0.00184	0.34448	4.7102e-17
	0.00182	0.34114	4.71002e-17
	0.00181	0.33779	4.70983e-17
	0.0018	0.33445	4.70965e-17
	0.00179	0.3311	4.70946e-17
	0.00178	0.32776	4.70927e-17
	0.00176	0.32441	4.70908e-17
	0.00175	0.32107	4.70888e-17
	0.00174	0.31773	4.70869e-17
	0.00173	0.31438	4.70849e-17
	0.00171	0.31104	4.7083e-17
	0.0017	0.30769	4.7081e-17
	0.00169	0.30435	4.7079e-17
	0.00168	0.301	4.7077e-17
	0.00166	0.29766	4.7075e-17
	0.00165	0.29431	4.7073e-17
	0.00164	0.29097	4.70709e-17
	0.00162	0.28763	4.70689e-17
	0.00161	0.28428	4.70668e-17
	0.0016	0.28094	4.70647e-17
	0.00158	0.27759	4.70626e-17
	0.00157	0.27425	4.70605e-17
	0.00156	0.2709	4.70583e-17
	0.00154	0.26756	4.70562e-17
	0.00153	0.26421	4.7054e-17
	0.00151	0.26087	4.70519e-17
	0.0015	0.25753	4.70497e-17
	0.00149	0.25418	4.70475e-17
	0.00147	0.25084	4.70452e-17
	0.00146	0.24749	4.7043e-17
	0.00144	0.24415	4.70407e-17
	0.00143	0.2408	4.70385e-17
	0.00141	0.23746	4.70362e-17
	0.0014	0.23411	4.70339e-17
	0.00138	0.23077	4.70315e-17
	0.00137	0.22742	4.70292e-17
	0.00135	0.22408	4.70269e-17
	0.00134	0.22074	4.70245e-17
	0.00132	0.21739	4.70221e-17
	0.00131	0.21405	4.70197e-17
	0.00129	0.2107	4.70172e-17
	0.00127	0.20736	4.70148e-17
	0.00126	0.20401	4.70123e-17
	0.00124	0.20067	4.70099e-17
	0.00123	0.19732	4.70074e-17
	0.00121	0.19398	4.70048e-17
	0.00119	0.19064	4.70023e-17
	0.00118	0.18729	4.69997e-17
	0.00116	0.18395	4.69972e-17
	0.00114	0.1806	4.69946e-17
	0.00113	0.17726	4.69919e-17
	0.00111	0.17391	4.69893e-17
	0.00109	0.17057	4.69866e-17
	0.00108	0.16722	4.6984e-17
	0.00106	0.16388	4.69813e-17
	0.00104	0.16054	4.69785e-17
	0.00102	0.15719	4.69758e-17
	0.00101	0.15385	4.6973e-17
	0.000988268	0.1505	4.69702e-17
	0.000970185	0.14716	4.69674e-17
	0.000951956	0.14381	4.69646e-17
	0.00093358	0.14047	4.69617e-17
	0.000915054	0.13712	4.69589e-17
	0.000896377	0.13378	4.6956e-17
	0.000877548	0.13043	4.6953e-17
	0.000858563	0.12709	4.69501e-17
	0.000839422	0.12375	4.69471e-17
	0.000820122	0.1204	4.69441e-17
	0.000800661	0.11706	4.69411e-17
	0.000781037	0.11371	4.6938e-17
	0.000761248	0.11037	4.6935e-17
	0.000741293	0.10702	4.69319e-17
	0.000721169	0.10368	4.69287e-17
	0.000700873	0.10033	4.69256e-17
	0.000680404	0.09699	4.69224e-17
	0.00065976	0.09365	4.69192e-17
	0.000638938	0.0903	4.69159e-17
	0.000617935	0.08696	4.69127e-17
	0.00059675	0.08361	4.69094e-17
	0.00057538	0.08027	4.69061e-17
	0.000553823	0.07692	4.69027e-17
	0.000532076	0.07358	4.68993e-17
	0.000510136	0.07023	4.68959e-17
	0.000488002	0.06689	4.68925e-17
	0.00046567	0.06355	4.6889e-17
	0.000443139	0.0602	4.68855e-17
	0.000420404	0.05686	4.6882e-17
	0.000397463	0.05351	4.68784e-17
	0.000374315	0.05017	4.68748e-17
	0.000350954	0.04682	4.68712e-17
	0.00032738	0.04348	4.68675e-17
	0.000303589	0.04013	4.68638e-17
	0.000279577	0.03679	4.68601e-17
	0.000255343	0.03344	4.68563e-17
	0.000230882	0.0301	4.68525e-17
	0.000206191	0.02676	4.68487e-17
	0.000181268	0.02341	4.68448e-17
	0.000156108	0.02007	4.68409e-17
	0.000130709	0.01672	4.68369e-17
	0.000105068	0.01338	4.6833e-17
	7.91795e-05	0.01003	4.68289e-17
	5.30414e-05	0.00669	4.68249e-17
	2.66498e-05	0.00334	4.68208e-17
	8.00688e-10	1e-07	4.68166e-17
	0.00652	1	4.78295e-17
	0.00651	0.99666	4.78281e-17
	0.0065	0.99331	4.78267e-17
	0.00649	0.98997	4.78253e-17
	0.00648	0.98662	4.78239e-17
	0.00647	0.98328	4.78225e-17
	0.00646	0.97993	4.78211e-17
	0.00645	0.97659	4.78197e-17
	0.00644	0.97324	4.78183e-17
	0.00644	0.9699	4.78168e-17
	0.00643	0.96656	4.78154e-17
	0.00642	0.96321	4.7814e-17
	0.00641	0.95987	4.78125e-17
	0.0064	0.95652	4.78111e-17
	0.00639	0.95318	4.78096e-17
	0.00638	0.94983	4.78082e-17
	0.00637	0.94649	4.78067e-17
	0.00636	0.94314	4.78052e-17
	0.00635	0.9398	4.78037e-17
	0.00634	0.93645	4.78023e-17
	0.00633	0.93311	4.78008e-17
	0.00632	0.92977	4.77993e-17
	0.00631	0.92642	4.77978e-17
	0.0063	0.92308	4.77962e-17
	0.00629	0.91973	4.77947e-17
	0.00628	0.91639	4.77932e-17
	0.00627	0.91304	4.77917e-17
	0.00626	0.9097	4.77901e-17
	0.00625	0.90635	4.77886e-17
	0.00624	0.90301	4.77871e-17
	0.00623	0.89967	4.77855e-17
	0.00622	0.89632	4.77839e-17
	0.00621	0.89298	4.77824e-17
	0.0062	0.88963	4.77808e-17
	0.00619	0.88629	4.77792e-17
	0.00618	0.88294	4.77776e-17
	0.00617	0.8796	4.7776e-17
	0.00616	0.87625	4.77744e-17
	0.00615	0.87291	4.77728e-17
	0.00614	0.86957	4.77712e-17
	0.00613	0.86622	4.77696e-17
	0.00612	0.86288	4.7768e-17
	0.00611	0.85953	4.77663e-17
	0.0061	0.85619	4.77647e-17
	0.00609	0.85284	4.7763e-17
	0.00608	0.8495	4.77614e-17
	0.00607	0.84615	4.77597e-17
	0.00606	0.84281	4.7758e-17
	0.00605	0.83946	4.77563e-17
	0.00603	0.83612	4.77547e-17
	0.00602	0.83278	4.7753e-17
	0.00601	0.82943	4.77513e-17
	0.006	0.82609	4.77495e-17
	0.00599	0.82274	4.77478e-17
	0.00598	0.8194	4.77461e-17
	0.00597	0.81605	4.77444e-17
	0.00596	0.81271	4.77426e-17
	0.00595	0.80936	4.77409e-17
	0.00594	0.80602	4.77391e-17
	0.00592	0.80268	4.77374e-17
	0.00591	0.79933	4.77356e-17
	0.0059	0.79599	4.77338e-17
	0.00589	0.79264	4.7732e-17
	0.00588	0.7893	4.77302e-17
	0.00587	0.78595	4.77284e-17
	0.00585	0.78261	4.77266e-17
	0.00584	0.77926	4.77248e-17
	0.00583	0.77592	4.7723e-17
	0.00582	0.77258	4.77211e-17
	0.00581	0.76923	4.77193e-17
	0.0058	0.76589	4.77174e-17
	0.00578	0.76254	4.77156e-17
	0.00577	0.7592	4.77137e-17
	0.00576	0.75585	4.77118e-17
	0.00575	0.75251	4.77099e-17
	0.00573	0.74916	4.7708e-17
	0.00572	0.74582	4.77061e-17
	0.00571	0.74247	4.77042e-17
	0.0057	0.73913	4.77023e-17
	0.00569	0.73579	4.77003e-17
	0.00567	0.73244	4.76984e-17
	0.00566	0.7291	4.76964e-17
	0.00565	0.72575	4.76945e-17
	0.00564	0.72241	4.76925e-17
	0.00562	0.71906	4.76905e-17
	0.00561	0.71572	4.76885e-17
	0.0056	0.71237	4.76865e-17
	0.00558	0.70903	4.76845e-17
	0.00557	0.70569	4.76825e-17
	0.00556	0.70234	4.76805e-17
	0.00554	0.699	4.76785e-17
	0.00553	0.69565	4.76764e-17
	0.00552	0.69231	4.76743e-17
	0.0055	0.68896	4.76723e-17
	0.00549	0.68562	4.76702e-17
	0.00548	0.68227	4.76681e-17
	0.00546	0.67893	4.7666e-17
	0.00545	0.67559	4.76639e-17
	0.00544	0.67224	4.76618e-17
	0.00542	0.6689	4.76597e-17
	0.00541	0.66555	4.76575e-17
	0.0054	0.66221	4.76554e-17
	0.00538	0.65886	4.76532e-17
	0.00537	0.65552	4.7651e-17
	0.00535	0.65217	4.76489e-17
	0.00534	0.64883	4.76467e-17
	0.00533	0.64548	4.76445e-17
	0.00531	0.64214	4.76422e-17
	0.0053	0.6388	4.764e-17
	0.00528	0.63545	4.76378e-17
	0.00527	0.63211	4.76355e-17
	0.00525	0.62876	4.76333e-17
	0.00524	0.62542	4.7631e-17
	0.00522	0.62207	4.76287e-17
	0.00521	0.61873	4.76264e-17
	0.0052	0.61538	4.76241e-17
	0.00518	0.61204	4.76218e-17
	0.00517	0.6087	4.76195e-17
	0.00515	0.60535	4.76171e-17
	0.00513	0.60201	4.76148e-17
	0.00512	0.59866	4.76124e-17
	0.0051	0.59532	4.761e-17
	0.00509	0.59197	4.76076e-17
	0.00507	0.58863	4.76052e-17
	0.00506	0.58528	4.76028e-17
	0.00504	0.58194	4.76004e-17
	0.00503	0.5786	4.75979e-17
	0.00501	0.57525	4.75955e-17
	0.00499	0.57191	4.7593e-17
	0.00498	0.56856	4.75905e-17
	0.00496	0.56522	4.7588e-17
	0.00495	0.56187	4.75855e-17
	0.00493	0.55853	4.7583e-17
	0.00491	0.55518	4.75804e-17
	0.0049	0.55184	4.75779e-17
	0.00488	0.5485	4.75753e-17
	0.00486	0.54515	4.75728e-17
	0.00485	0.54181	4.75702e-17
	0.00483	0.53846	4.75676e-17
	0.00481	0.53512	4.75649e-17
	0.0048	0.53177	4.75623e-17
	0.00478	0.52843	4.75597e-17
	0.00476	0.52508	4.7557e-17
	0.00475	0.52174	4.75543e-17
	0.00473	0.51839	4.75516e-17
	0.00471	0.51505	4.75489e-17
	0.00469	0.51171	4.75462e-17
	0.00468	0.50836	4.75434e-17
	0.00466	0.50502	4.75407e-17
	0.00464	0.50167	4.75379e-17
	0.00462	0.49833	4.75351e-17
	0.0046	0.49498	4.75323e-17
	0.00459	0.49164	4.75295e-17
	0.00457	0.48829	4.75267e-17
	0.00455	0.48495	4.75238e-17
	0.00453	0.48161	4.7521e-17
	0.00451	0.47826	4.75181e-17
	0.00449	0.47492	4.75152e-17
	0.00448	0.47157	4.75123e-17
	0.00446	0.46823	4.75093e-17
	0.00444	0.46488	4.75064e-17
	0.00442	0.46154	4.75034e-17
	0.0044	0.45819	4.75004e-17
	0.00438	0.45485	4.74974e-17
	0.00436	0.45151	4.74944e-17
	0.00434	0.44816	4.74914e-17
	0.00432	0.44482	4.74883e-17
	0.0043	0.44147	4.74853e-17
	0.00428	0.43813	4.74822e-17
	0.00426	0.43478	4.74791e-17
	0.00424	0.43144	4.74759e-17
	0.00422	0.42809	4.74728e-17
	0.0042	0.42475	4.74696e-17
	0.00418	0.4214	4.74664e-17
	0.00416	0.41806	4.74632e-17
	0.00414	0.41472	4.746e-17
	0.00412	0.41137	4.74568e-17
	0.0041	0.40803	4.74535e-17
	0.00408	0.40468	4.74502e-17
	0.00405	0.40134	4.74469e-17
	0.00403	0.39799	4.74436e-17
	0.00401	0.39465	4.74402e-17
	0.00399	0.3913	4.74369e-17
	0.00397	0.38796	4.74335e-17
	0.00395	0.38462	4.74301e-17
	0.00392	0.38127	4.74266e-17
	0.0039	0.37793	4.74232e-17
	0.00388	0.37458	4.74197e-17
	0.00386	0.37124	4.74162e-17
	0.00384	0.36789	4.74127e-17
	0.00381	0.36455	4.74092e-17
	0.00379	0.3612	4.74056e-17
	0.00377	0.35786	4.7402e-17
	0.00374	0.35452	4.73984e-17
	0.00372	0.35117	4.73948e-17
	0.0037	0.34783	4.73911e-17
	0.00367	0.34448	4.73875e-17
	0.00365	0.34114	4.73838e-17
	0.00362	0.33779	4.738e-17
	0.0036	0.33445	4.73763e-17
	0.00358	0.3311	4.73725e-17
	0.00355	0.32776	4.73687e-17
	0.00353	0.32441	4.73649e-17
	0.0035	0.32107	4.7361e-17
	0.00348	0.31773	4.73572e-17
	0.00345	0.31438	4.73533e-17
	0.00343	0.31104	4.73493e-17
	0.0034	0.30769	4.73454e-17
	0.00338	0.30435	4.73414e-17
	0.00335	0.301	4.73374e-17
	0.00332	0.29766	4.73333e-17
	0.0033	0.29431	4.73293e-17
	0.00327	0.29097	4.73252e-17
	0.00325	0.28763	4.73211e-17
	0.00322	0.28428	4.73169e-17
	0.00319	0.28094	4.73128e-17
	0.00316	0.27759	4.73085e-17
	0.00314	0.27425	4.73043e-17
	0.00311	0.2709	4.73e-17
	0.00308	0.26756	4.72958e-17
	0.00305	0.26421	4.72914e-17
	0.00303	0.26087	4.72871e-17
	0.003	0.25753	4.72827e-17
	0.00297	0.25418	4.72783e-17
	0.00294	0.25084	4.72738e-17
	0.00291	0.24749	4.72693e-17
	0.00288	0.24415	4.72648e-17
	0.00285	0.2408	4.72603e-17
	0.00282	0.23746	4.72557e-17
	0.0028	0.23411	4.72511e-17
	0.00277	0.23077	4.72465e-17
	0.00274	0.22742	4.72418e-17
	0.0027	0.22408	4.72371e-17
	0.00267	0.22074	4.72323e-17
	0.00264	0.21739	4.72275e-17
	0.00261	0.21405	4.72227e-17
	0.00258	0.2107	4.72179e-17
	0.00255	0.20736	4.7213e-17
	0.00252	0.20401	4.7208e-17
	0.00249	0.20067	4.72031e-17
	0.00245	0.19732	4.71981e-17
	0.00242	0.19398	4.7193e-17
	0.00239	0.19064	4.7188e-17
	0.00236	0.18729	4.71828e-17
	0.00232	0.18395	4.71777e-17
	0.00229	0.1806	4.71725e-17
	0.00226	0.17726	4.71673e-17
	0.00222	0.17391	4.7162e-17
	0.00219	0.17057	4.71567e-17
	0.00215	0.16722	4.71513e-17
	0.00212	0.16388	4.71459e-17
	0.00208	0.16054	4.71404e-17
	0.00205	0.15719	4.7135e-17
	0.00201	0.15385	4.71294e-17
	0.00198	0.1505	4.71238e-17
	0.00194	0.14716	4.71182e-17
	0.0019	0.14381	4.71126e-17
	0.00187	0.14047	4.71068e-17
	0.00183	0.13712	4.71011e-17
	0.00179	0.13378	4.70953e-17
	0.00176	0.13043	4.70894e-17
	0.00172	0.12709	4.70835e-17
	0.00168	0.12375	4.70776e-17
	0.00164	0.1204	4.70716e-17
	0.0016	0.11706	4.70655e-17
	0.00156	0.11371	4.70594e-17
	0.00152	0.11037	4.70533e-17
	0.00148	0.10702	4.70471e-17
	0.00144	0.10368	4.70408e-17
	0.0014	0.10033	4.70345e-17
	0.00136	0.09699	4.70281e-17
	0.00132	0.09365	4.70217e-17
	0.00128	0.0903	4.70153e-17
	0.00124	0.08696	4.70087e-17
	0.00119	0.08361	4.70021e-17
	0.00115	0.08027	4.69955e-17
	0.00111	0.07692	4.69888e-17
	0.00106	0.07358	4.6982e-17
	0.00102	0.07023	4.69752e-17
	0.000976004	0.06689	4.69683e-17
	0.000931341	0.06355	4.69614e-17
	0.000886277	0.0602	4.69544e-17
	0.000840807	0.05686	4.69473e-17
	0.000794927	0.05351	4.69402e-17
	0.000748629	0.05017	4.6933e-17
	0.000701909	0.04682	4.69257e-17
	0.00065476	0.04348	4.69184e-17
	0.000607178	0.04013	4.6911e-17
	0.000559155	0.03679	4.69035e-17
	0.000510685	0.03344	4.6896e-17
	0.000461763	0.0301	4.68884e-17
	0.000412382	0.02676	4.68807e-17
	0.000362535	0.02341	4.6873e-17
	0.000312217	0.02007	4.68652e-17
	0.000261419	0.01672	4.68573e-17
	0.000210135	0.01338	4.68493e-17
	0.000158359	0.01003	4.68412e-17
	0.000106083	0.00669	4.68331e-17
	5.32995e-05	0.00334	4.68249e-17
	1.60138e-09	1e-07	4.68166e-17
	0.00977	1	4.83359e-17
	0.00976	0.99666	4.83338e-17
	0.00975	0.99331	4.83317e-17
	0.00973	0.98997	4.83296e-17
	0.00972	0.98662	4.83275e-17
	0.00971	0.98328	4.83254e-17
	0.00969	0.97993	4.83233e-17
	0.00968	0.97659	4.83212e-17
	0.00967	0.97324	4.83191e-17
	0.00965	0.9699	4.83169e-17
	0.00964	0.96656	4.83148e-17
	0.00962	0.96321	4.83126e-17
	0.00961	0.95987	4.83105e-17
	0.0096	0.95652	4.83083e-17
	0.00958	0.95318	4.83061e-17
	0.00957	0.94983	4.83039e-17
	0.00955	0.94649	4.83017e-17
	0.00954	0.94314	4.82995e-17
	0.00953	0.9398	4.82973e-17
	0.00951	0.93645	4.82951e-17
	0.0095	0.93311	4.82928e-17
	0.00948	0.92977	4.82906e-17
	0.00947	0.92642	4.82883e-17
	0.00945	0.92308	4.82861e-17
	0.00944	0.91973	4.82838e-17
	0.00942	0.91639	4.82815e-17
	0.00941	0.91304	4.82792e-17
	0.00939	0.9097	4.82769e-17
	0.00938	0.90635	4.82746e-17
	0.00937	0.90301	4.82723e-17
	0.00935	0.89967	4.82699e-17
	0.00934	0.89632	4.82676e-17
	0.00932	0.89298	4.82652e-17
	0.0093	0.88963	4.82629e-17
	0.00929	0.88629	4.82605e-17
	0.00927	0.88294	4.82581e-17
	0.00926	0.8796	4.82557e-17
	0.00924	0.87625	4.82533e-17
	0.00923	0.87291	4.82509e-17
	0.00921	0.86957	4.82485e-17
	0.0092	0.86622	4.82461e-17
	0.00918	0.86288	4.82436e-17
	0.00916	0.85953	4.82412e-17
	0.00915	0.85619	4.82387e-17
	0.00913	0.85284	4.82362e-17
	0.00912	0.8495	4.82337e-17
	0.0091	0.84615	4.82312e-17
	0.00908	0.84281	4.82287e-17
	0.00907	0.83946	4.82262e-17
	0.00905	0.83612	4.82237e-17
	0.00904	0.83278	4.82211e-17
	0.00902	0.82943	4.82186e-17
	0.009	0.82609	4.8216e-17
	0.00899	0.82274	4.82134e-17
	0.00897	0.8194	4.82108e-17
	0.00895	0.81605	4.82082e-17
	0.00894	0.81271	4.82056e-17
	0.00892	0.80936	4.8203e-17
	0.0089	0.80602	4.82004e-17
	0.00889	0.80268	4.81977e-17
	0.00887	0.79933	4.81951e-17
	0.00885	0.79599	4.81924e-17
	0.00883	0.79264	4.81897e-17
	0.00882	0.7893	4.8187e-17
	0.0088	0.78595	4.81843e-17
	0.00878	0.78261	4.81816e-17
	0.00876	0.77926	4.81789e-17
	0.00875	0.77592	4.81761e-17
	0.00873	0.77258	4.81734e-17
	0.00871	0.76923	4.81706e-17
	0.00869	0.76589	4.81678e-17
	0.00868	0.76254	4.8165e-17
	0.00866	0.7592	4.81622e-17
	0.00864	0.75585	4.81594e-17
	0.00862	0.75251	4.81566e-17
	0.0086	0.74916	4.81537e-17
	0.00858	0.74582	4.81509e-17
	0.00857	0.74247	4.8148e-17
	0.00855	0.73913	4.81451e-17
	0.00853	0.73579	4.81422e-17
	0.00851	0.73244	4.81393e-17
	0.00849	0.7291	4.81364e-17
	0.00847	0.72575	4.81334e-17
	0.00845	0.72241	4.81305e-17
	0.00843	0.71906	4.81275e-17
	0.00841	0.71572	4.81245e-17
	0.0084	0.71237	4.81215e-17
	0.00838	0.70903	4.81185e-17
	0.00836	0.70569	4.81155e-17
	0.00834	0.70234	4.81124e-17
	0.00832	0.699	4.81094e-17
	0.0083	0.69565	4.81063e-17
	0.00828	0.69231	4.81032e-17
	0.00826	0.68896	4.81001e-17
	0.00824	0.68562	4.8097e-17
	0.00822	0.68227	4.80939e-17
	0.0082	0.67893	4.80907e-17
	0.00818	0.67559	4.80875e-17
	0.00816	0.67224	4.80844e-17
	0.00814	0.6689	4.80812e-17
	0.00812	0.66555	4.8078e-17
	0.00809	0.66221	4.80747e-17
	0.00807	0.65886	4.80715e-17
	0.00805	0.65552	4.80682e-17
	0.00803	0.65217	4.8065e-17
	0.00801	0.64883	4.80617e-17
	0.00799	0.64548	4.80584e-17
	0.00797	0.64214	4.8055e-17
	0.00795	0.6388	4.80517e-17
	0.00792	0.63545	4.80484e-17
	0.0079	0.63211	4.8045e-17
	0.00788	0.62876	4.80416e-17
	0.00786	0.62542	4.80382e-17
	0.00784	0.62207	4.80348e-17
	0.00781	0.61873	4.80313e-17
	0.00779	0.61538	4.80278e-17
	0.00777	0.61204	4.80244e-17
	0.00775	0.6087	4.80209e-17
	0.00773	0.60535	4.80174e-17
	0.0077	0.60201	4.80138e-17
	0.00768	0.59866	4.80103e-17
	0.00766	0.59532	4.80067e-17
	0.00763	0.59197	4.80031e-17
	0.00761	0.58863	4.79995e-17
	0.00759	0.58528	4.79959e-17
	0.00756	0.58194	4.79922e-17
	0.00754	0.5786	4.79886e-17
	0.00752	0.57525	4.79849e-17
	0.00749	0.57191	4.79812e-17
	0.00747	0.56856	4.79775e-17
	0.00744	0.56522	4.79737e-17
	0.00742	0.56187	4.79699e-17
	0.0074	0.55853	4.79662e-17
	0.00737	0.55518	4.79624e-17
	0.00735	0.55184	4.79585e-17
	0.00732	0.5485	4.79547e-17
	0.0073	0.54515	4.79508e-17
	0.00727	0.54181	4.79469e-17
	0.00725	0.53846	4.7943e-17
	0.00722	0.53512	4.79391e-17
	0.0072	0.53177	4.79351e-17
	0.00717	0.52843	4.79312e-17
	0.00714	0.52508	4.79272e-17
	0.00712	0.52174	4.79231e-17
	0.00709	0.51839	4.79191e-17
	0.00707	0.51505	4.7915e-17
	0.00704	0.51171	4.7911e-17
	0.00701	0.50836	4.79069e-17
	0.00699	0.50502	4.79027e-17
	0.00696	0.50167	4.78986e-17
	0.00693	0.49833	4.78944e-17
	0.00691	0.49498	4.78902e-17
	0.00688	0.49164	4.7886e-17
	0.00685	0.48829	4.78817e-17
	0.00682	0.48495	4.78774e-17
	0.0068	0.48161	4.78731e-17
	0.00677	0.47826	4.78688e-17
	0.00674	0.47492	4.78645e-17
	0.00671	0.47157	4.78601e-17
	0.00669	0.46823	4.78557e-17
	0.00666	0.46488	4.78513e-17
	0.00663	0.46154	4.78468e-17
	0.0066	0.45819	4.78423e-17
	0.00657	0.45485	4.78378e-17
	0.00654	0.45151	4.78333e-17
	0.00651	0.44816	4.78288e-17
	0.00648	0.44482	4.78242e-17
	0.00645	0.44147	4.78196e-17
	0.00642	0.43813	4.78149e-17
	0.00639	0.43478	4.78103e-17
	0.00636	0.43144	4.78056e-17
	0.00633	0.42809	4.78008e-17
	0.0063	0.42475	4.77961e-17
	0.00627	0.4214	4.77913e-17
	0.00624	0.41806	4.77865e-17
	0.00621	0.41472	4.77817e-17
	0.00618	0.41137	4.77768e-17
	0.00615	0.40803	4.77719e-17
	0.00611	0.40468	4.7767e-17
	0.00608	0.40134	4.7762e-17
	0.00605	0.39799	4.77571e-17
	0.00602	0.39465	4.7752e-17
	0.00599	0.3913	4.7747e-17
	0.00595	0.38796	4.77419e-17
	0.00592	0.38462	4.77368e-17
	0.00589	0.38127	4.77317e-17
	0.00585	0.37793	4.77265e-17
	0.00582	0.37458	4.77213e-17
	0.00579	0.37124	4.7716e-17
	0.00575	0.36789	4.77108e-17
	0.00572	0.36455	4.77054e-17
	0.00568	0.3612	4.77001e-17
	0.00565	0.35786	4.76947e-17
	0.00561	0.35452	4.76893e-17
	0.00558	0.35117	4.76839e-17
	0.00554	0.34783	4.76784e-17
	0.00551	0.34448	4.76729e-17
	0.00547	0.34114	4.76673e-17
	0.00544	0.33779	4.76617e-17
	0.0054	0.33445	4.76561e-17
	0.00536	0.3311	4.76504e-17
	0.00533	0.32776	4.76447e-17
	0.00529	0.32441	4.7639e-17
	0.00525	0.32107	4.76332e-17
	0.00522	0.31773	4.76274e-17
	0.00518	0.31438	4.76216e-17
	0.00514	0.31104	4.76157e-17
	0.0051	0.30769	4.76097e-17
	0.00506	0.30435	4.76038e-17
	0.00503	0.301	4.75978e-17
	0.00499	0.29766	4.75917e-17
	0.00495	0.29431	4.75856e-17
	0.00491	0.29097	4.75795e-17
	0.00487	0.28763	4.75733e-17
	0.00483	0.28428	4.75671e-17
	0.00479	0.28094	4.75608e-17
	0.00475	0.27759	4.75545e-17
	0.00471	0.27425	4.75482e-17
	0.00467	0.2709	4.75418e-17
	0.00462	0.26756	4.75353e-17
	0.00458	0.26421	4.75288e-17
	0.00454	0.26087	4.75223e-17
	0.0045	0.25753	4.75157e-17
	0.00446	0.25418	4.75091e-17
	0.00441	0.25084	4.75024e-17
	0.00437	0.24749	4.74957e-17
	0.00433	0.24415	4.74889e-17
	0.00428	0.2408	4.74821e-17
	0.00424	0.23746	4.74753e-17
	0.00419	0.23411	4.74683e-17
	0.00415	0.23077	4.74614e-17
	0.0041	0.22742	4.74544e-17
	0.00406	0.22408	4.74473e-17
	0.00401	0.22074	4.74402e-17
	0.00397	0.21739	4.7433e-17
	0.00392	0.21405	4.74258e-17
	0.00387	0.2107	4.74185e-17
	0.00382	0.20736	4.74111e-17
	0.00378	0.20401	4.74038e-17
	0.00373	0.20067	4.73963e-17
	0.00368	0.19732	4.73888e-17
	0.00363	0.19398	4.73812e-17
	0.00358	0.19064	4.73736e-17
	0.00353	0.18729	4.73659e-17
	0.00348	0.18395	4.73582e-17
	0.00343	0.1806	4.73504e-17
	0.00338	0.17726	4.73426e-17
	0.00333	0.17391	4.73346e-17
	0.00328	0.17057	4.73267e-17
	0.00323	0.16722	4.73186e-17
	0.00318	0.16388	4.73105e-17
	0.00312	0.16054	4.73024e-17
	0.00307	0.15719	4.72941e-17
	0.00302	0.15385	4.72858e-17
	0.00296	0.1505	4.72775e-17
	0.00291	0.14716	4.7269e-17
	0.00286	0.14381	4.72605e-17
	0.0028	0.14047	4.7252e-17
	0.00275	0.13712	4.72433e-17
	0.00269	0.13378	4.72346e-17
	0.00263	0.13043	4.72258e-17
	0.00258	0.12709	4.7217e-17
	0.00252	0.12375	4.72081e-17
	0.00246	0.1204	4.71991e-17
	0.0024	0.11706	4.719e-17
	0.00234	0.11371	4.71808e-17
	0.00228	0.11037	4.71716e-17
	0.00222	0.10702	4.71623e-17
	0.00216	0.10368	4.71529e-17
	0.0021	0.10033	4.71434e-17
	0.00204	0.09699	4.71339e-17
	0.00198	0.09365	4.71243e-17
	0.00192	0.0903	4.71146e-17
	0.00185	0.08696	4.71048e-17
	0.00179	0.08361	4.70949e-17
	0.00173	0.08027	4.70849e-17
	0.00166	0.07692	4.70749e-17
	0.0016	0.07358	4.70647e-17
	0.00153	0.07023	4.70545e-17
	0.00146	0.06689	4.70442e-17
	0.0014	0.06355	4.70338e-17
	0.00133	0.0602	4.70233e-17
	0.00126	0.05686	4.70127e-17
	0.00119	0.05351	4.7002e-17
	0.00112	0.05017	4.69912e-17
	0.00105	0.04682	4.69803e-17
	0.000982141	0.04348	4.69693e-17
	0.000910767	0.04013	4.69582e-17
	0.000838732	0.03679	4.6947e-17
	0.000766028	0.03344	4.69357e-17
	0.000692645	0.0301	4.69243e-17
	0.000618573	0.02676	4.69128e-17
	0.000543803	0.02341	4.69012e-17
	0.000468325	0.02007	4.68894e-17
	0.000392128	0.01672	4.68776e-17
	0.000315203	0.01338	4.68656e-17
	0.000237539	0.01003	4.68536e-17
	0.000159124	0.00669	4.68414e-17
	7.99493e-05	0.00334	4.68291e-17
	2.40207e-09	1e-07	4.68166e-17
	0.01303	1	9.76846e-17
	0.01301	0.99666	9.76791e-17
	0.013	0.99331	9.76735e-17
	0.01298	0.98997	9.7668e-17
	0.01296	0.98662	9.76624e-17
	0.01294	0.98328	9.76568e-17
	0.01292	0.97993	9.76511e-17
	0.01291	0.97659	9.76455e-17
	0.01289	0.97324	9.76398e-17
	0.01287	0.9699	9.76341e-17
	0.01285	0.96656	9.76284e-17
	0.01283	0.96321	9.76226e-17
	0.01281	0.95987	9.76168e-17
	0.0128	0.95652	9.7611e-17
	0.01278	0.95318	9.76052e-17
	0.01276	0.94983	9.75994e-17
	0.01274	0.94649	9.75935e-17
	0.01272	0.94314	9.75876e-17
	0.0127	0.9398	9.75817e-17
	0.01268	0.93645	9.75757e-17
	0.01266	0.93311	9.75698e-17
	0.01264	0.92977	9.75638e-17
	0.01262	0.92642	9.75578e-17
	0.01261	0.92308	9.75517e-17
	0.01259	0.91973	9.75457e-17
	0.01257	0.91639	9.75396e-17
	0.01255	0.91304	9.75335e-17
	0.01253	0.9097	9.75273e-17
	0.01251	0.90635	9.75211e-17
	0.01249	0.90301	9.7515e-17
	0.01247	0.89967	9.75087e-17
	0.01245	0.89632	9.75025e-17
	0.01243	0.89298	9.74962e-17
	0.01241	0.88963	9.74899e-17
	0.01239	0.88629	9.74836e-17
	0.01237	0.88294	9.74772e-17
	0.01234	0.8796	9.74709e-17
	0.01232	0.87625	9.74644e-17
	0.0123	0.87291	9.7458e-17
	0.01228	0.86957	9.74515e-17
	0.01226	0.86622	9.74451e-17
	0.01224	0.86288	9.74385e-17
	0.01222	0.85953	9.7432e-17
	0.0122	0.85619	9.74254e-17
	0.01218	0.85284	9.74188e-17
	0.01216	0.8495	9.74122e-17
	0.01213	0.84615	9.74055e-17
	0.01211	0.84281	9.73988e-17
	0.01209	0.83946	9.73921e-17
	0.01207	0.83612	9.73854e-17
	0.01205	0.83278	9.73786e-17
	0.01203	0.82943	9.73718e-17
	0.012	0.82609	9.73649e-17
	0.01198	0.82274	9.73581e-17
	0.01196	0.8194	9.73512e-17
	0.01194	0.81605	9.73442e-17
	0.01192	0.81271	9.73373e-17
	0.01189	0.80936	9.73303e-17
	0.01187	0.80602	9.73232e-17
	0.01185	0.80268	9.73162e-17
	0.01182	0.79933	9.73091e-17
	0.0118	0.79599	9.7302e-17
	0.01178	0.79264	9.72948e-17
	0.01176	0.7893	9.72876e-17
	0.01173	0.78595	9.72804e-17
	0.01171	0.78261	9.72732e-17
	0.01169	0.77926	9.72659e-17
	0.01166	0.77592	9.72586e-17
	0.01164	0.77258	9.72512e-17
	0.01161	0.76923	9.72438e-17
	0.01159	0.76589	9.72364e-17
	0.01157	0.76254	9.7229e-17
	0.01154	0.7592	9.72215e-17
	0.01152	0.75585	9.7214e-17
	0.01149	0.75251	9.72064e-17
	0.01147	0.74916	9.71988e-17
	0.01145	0.74582	9.71912e-17
	0.01142	0.74247	9.71835e-17
	0.0114	0.73913	9.71758e-17
	0.01137	0.73579	9.71681e-17
	0.01135	0.73244	9.71603e-17
	0.01132	0.7291	9.71525e-17
	0.0113	0.72575	9.71447e-17
	0.01127	0.72241	9.71368e-17
	0.01124	0.71906	9.71289e-17
	0.01122	0.71572	9.71209e-17
	0.01119	0.71237	9.71129e-17
	0.01117	0.70903	9.71049e-17
	0.01114	0.70569	9.70968e-17
	0.01112	0.70234	9.70887e-17
	0.01109	0.699	9.70805e-17
	0.01106	0.69565	9.70724e-17
	0.01104	0.69231	9.70641e-17
	0.01101	0.68896	9.70559e-17
	0.01098	0.68562	9.70475e-17
	0.01096	0.68227	9.70392e-17
	0.01093	0.67893	9.70308e-17
	0.0109	0.67559	9.70224e-17
	0.01088	0.67224	9.70139e-17
	0.01085	0.6689	9.70054e-17
	0.01082	0.66555	9.69968e-17
	0.01079	0.66221	9.69882e-17
	0.01076	0.65886	9.69796e-17
	0.01074	0.65552	9.69709e-17
	0.01071	0.65217	9.69622e-17
	0.01068	0.64883	9.69534e-17
	0.01065	0.64548	9.69446e-17
	0.01062	0.64214	9.69357e-17
	0.01059	0.6388	9.69268e-17
	0.01057	0.63545	9.69178e-17
	0.01054	0.63211	9.69088e-17
	0.01051	0.62876	9.68998e-17
	0.01048	0.62542	9.68907e-17
	0.01045	0.62207	9.68816e-17
	0.01042	0.61873	9.68724e-17
	0.01039	0.61538	9.68632e-17
	0.01036	0.61204	9.68539e-17
	0.01033	0.6087	9.68446e-17
	0.0103	0.60535	9.68352e-17
	0.01027	0.60201	9.68258e-17
	0.01024	0.59866	9.68163e-17
	0.01021	0.59532	9.68068e-17
	0.01018	0.59197	9.67972e-17
	0.01015	0.58863	9.67876e-17
	0.01012	0.58528	9.67779e-17
	0.01008	0.58194	9.67682e-17
	0.01005	0.5786	9.67584e-17
	0.01002	0.57525	9.67486e-17
	0.00999	0.57191	9.67387e-17
	0.00996	0.56856	9.67288e-17
	0.00993	0.56522	9.67188e-17
	0.00989	0.56187	9.67088e-17
	0.00986	0.55853	9.66987e-17
	0.00983	0.55518	9.66885e-17
	0.0098	0.55184	9.66783e-17
	0.00976	0.5485	9.66681e-17
	0.00973	0.54515	9.66578e-17
	0.0097	0.54181	9.66474e-17
	0.00966	0.53846	9.6637e-17
	0.00963	0.53512	9.66265e-17
	0.00959	0.53177	9.66159e-17
	0.00956	0.52843	9.66053e-17
	0.00953	0.52508	9.65947e-17
	0.00949	0.52174	9.6584e-17
	0.00946	0.51839	9.65732e-17
	0.00942	0.51505	9.65624e-17
	0.00939	0.51171	9.65515e-17
	0.00935	0.50836	9.65405e-17
	0.00932	0.50502	9.65295e-17
	0.00928	0.50167	9.65184e-17
	0.00925	0.49833	9.65073e-17
	0.00921	0.49498	9.64961e-17
	0.00917	0.49164	9.64848e-17
	0.00914	0.48829	9.64735e-17
	0.0091	0.48495	9.64621e-17
	0.00906	0.48161	9.64506e-17
	0.00903	0.47826	9.64391e-17
	0.00899	0.47492	9.64275e-17
	0.00895	0.47157	9.64158e-17
	0.00891	0.46823	9.64041e-17
	0.00888	0.46488	9.63923e-17
	0.00884	0.46154	9.63804e-17
	0.0088	0.45819	9.63685e-17
	0.00876	0.45485	9.63565e-17
	0.00872	0.45151	9.63444e-17
	0.00868	0.44816	9.63323e-17
	0.00864	0.44482	9.632e-17
	0.0086	0.44147	9.63077e-17
	0.00856	0.43813	9.62954e-17
	0.00852	0.43478	9.62829e-17
	0.00848	0.43144	9.62704e-17
	0.00844	0.42809	9.62578e-17
	0.0084	0.42475	9.62452e-17
	0.00836	0.4214	9.62324e-17
	0.00832	0.41806	9.62196e-17
	0.00828	0.41472	9.62067e-17
	0.00824	0.41137	9.61937e-17
	0.00819	0.40803	9.61807e-17
	0.00815	0.40468	9.61676e-17
	0.00811	0.40134	9.61543e-17
	0.00807	0.39799	9.61411e-17
	0.00802	0.39465	9.61277e-17
	0.00798	0.3913	9.61142e-17
	0.00794	0.38796	9.61007e-17
	0.00789	0.38462	9.6087e-17
	0.00785	0.38127	9.60733e-17
	0.0078	0.37793	9.60595e-17
	0.00776	0.37458	9.60456e-17
	0.00772	0.37124	9.60317e-17
	0.00767	0.36789	9.60176e-17
	0.00762	0.36455	9.60034e-17
	0.00758	0.3612	9.59892e-17
	0.00753	0.35786	9.59749e-17
	0.00749	0.35452	9.59604e-17
	0.00744	0.35117	9.59459e-17
	0.00739	0.34783	9.59313e-17
	0.00735	0.34448	9.59166e-17
	0.0073	0.34114	9.59018e-17
	0.00725	0.33779	9.58869e-17
	0.0072	0.33445	9.58719e-17
	0.00715	0.3311	9.58568e-17
	0.0071	0.32776	9.58416e-17
	0.00705	0.32441	9.58263e-17
	0.00701	0.32107	9.58109e-17
	0.00696	0.31773	9.57954e-17
	0.0069	0.31438	9.57798e-17
	0.00685	0.31104	9.5764e-17
	0.0068	0.30769	9.57482e-17
	0.00675	0.30435	9.57323e-17
	0.0067	0.301	9.57163e-17
	0.00665	0.29766	9.57001e-17
	0.0066	0.29431	9.56839e-17
	0.00654	0.29097	9.56675e-17
	0.00649	0.28763	9.5651e-17
	0.00644	0.28428	9.56344e-17
	0.00638	0.28094	9.56177e-17
	0.00633	0.27759	9.56009e-17
	0.00628	0.27425	9.5584e-17
	0.00622	0.2709	9.55669e-17
	0.00617	0.26756	9.55498e-17
	0.00611	0.26421	9.55325e-17
	0.00605	0.26087	9.5515e-17
	0.006	0.25753	9.54975e-17
	0.00594	0.25418	9.54798e-17
	0.00588	0.25084	9.5462e-17
	0.00583	0.24749	9.54441e-17
	0.00577	0.24415	9.54261e-17
	0.00571	0.2408	9.54079e-17
	0.00565	0.23746	9.53896e-17
	0.00559	0.23411	9.53711e-17
	0.00553	0.23077	9.53526e-17
	0.00547	0.22742	9.53339e-17
	0.00541	0.22408	9.5315e-17
	0.00535	0.22074	9.5296e-17
	0.00529	0.21739	9.52769e-17
	0.00523	0.21405	9.52576e-17
	0.00516	0.2107	9.52382e-17
	0.0051	0.20736	9.52186e-17
	0.00504	0.20401	9.51989e-17
	0.00497	0.20067	9.51791e-17
	0.00491	0.19732	9.5159e-17
	0.00484	0.19398	9.51389e-17
	0.00478	0.19064	9.51186e-17
	0.00471	0.18729	9.50981e-17
	0.00465	0.18395	9.50775e-17
	0.00458	0.1806	9.50567e-17
	0.00451	0.17726	9.50357e-17
	0.00444	0.17391	9.50146e-17
	0.00438	0.17057	9.49934e-17
	0.00431	0.16722	9.49719e-17
	0.00424	0.16388	9.49503e-17
	0.00417	0.16054	9.49285e-17
	0.0041	0.15719	9.49066e-17
	0.00402	0.15385	9.48844e-17
	0.00395	0.1505	9.48621e-17
	0.00388	0.14716	9.48396e-17
	0.00381	0.14381	9.4817e-17
	0.00373	0.14047	9.47941e-17
	0.00366	0.13712	9.47711e-17
	0.00359	0.13378	9.47479e-17
	0.00351	0.13043	9.47245e-17
	0.00343	0.12709	9.47008e-17
	0.00336	0.12375	9.4677e-17
	0.00328	0.1204	9.4653e-17
	0.0032	0.11706	9.46288e-17
	0.00312	0.11371	9.46044e-17
	0.00304	0.11037	9.45798e-17
	0.00297	0.10702	9.4555e-17
	0.00288	0.10368	9.453e-17
	0.0028	0.10033	9.45048e-17
	0.00272	0.09699	9.44793e-17
	0.00264	0.09365	9.44536e-17
	0.00256	0.0903	9.44278e-17
	0.00247	0.08696	9.44016e-17
	0.00239	0.08361	9.43753e-17
	0.0023	0.08027	9.43487e-17
	0.00222	0.07692	9.43219e-17
	0.00213	0.07358	9.42949e-17
	0.00204	0.07023	9.42676e-17
	0.00195	0.06689	9.42401e-17
	0.00186	0.06355	9.42123e-17
	0.00177	0.0602	9.41843e-17
	0.00168	0.05686	9.4156e-17
	0.00159	0.05351	9.41275e-17
	0.0015	0.05017	9.40987e-17
	0.0014	0.04682	9.40697e-17
	0.00131	0.04348	9.40403e-17
	0.00121	0.04013	9.40108e-17
	0.00112	0.03679	9.39809e-17
	0.00102	0.03344	9.39508e-17
	0.000923526	0.0301	9.39204e-17
	0.000824764	0.02676	9.38897e-17
	0.000725071	0.02341	9.38587e-17
	0.000624433	0.02007	9.38274e-17
	0.000522838	0.01672	9.37958e-17
	0.000420271	0.01338	9.37639e-17
	0.000316718	0.01003	9.37317e-17
	0.000212166	0.00669	9.36992e-17
	0.000106599	0.00334	9.36664e-17
	3.20275e-09	1e-07	9.36333e-17
	0.01629	1	9.86974e-17
	0.01627	0.99666	9.86905e-17
	0.01625	0.99331	9.86836e-17
	0.01622	0.98997	9.86766e-17
	0.0162	0.98662	9.86697e-17
	0.01618	0.98328	9.86626e-17
	0.01616	0.97993	9.86556e-17
	0.01613	0.97659	9.86485e-17
	0.01611	0.97324	9.86414e-17
	0.01609	0.9699	9.86343e-17
	0.01606	0.96656	9.86271e-17
	0.01604	0.96321	9.86199e-17
	0.01602	0.95987	9.86127e-17
	0.01599	0.95652	9.86055e-17
	0.01597	0.95318	9.85982e-17
	0.01595	0.94983	9.85909e-17
	0.01592	0.94649	9.85836e-17
	0.0159	0.94314	9.85762e-17
	0.01588	0.9398	9.85688e-17
	0.01585	0.93645	9.85614e-17
	0.01583	0.93311	9.85539e-17
	0.0158	0.92977	9.85464e-17
	0.01578	0.92642	9.85389e-17
	0.01576	0.92308	9.85313e-17
	0.01573	0.91973	9.85238e-17
	0.01571	0.91639	9.85162e-17
	0.01568	0.91304	9.85085e-17
	0.01566	0.9097	9.85008e-17
	0.01563	0.90635	9.84931e-17
	0.01561	0.90301	9.84854e-17
	0.01558	0.89967	9.84776e-17
	0.01556	0.89632	9.84698e-17
	0.01553	0.89298	9.8462e-17
	0.01551	0.88963	9.84541e-17
	0.01548	0.88629	9.84462e-17
	0.01546	0.88294	9.84382e-17
	0.01543	0.8796	9.84303e-17
	0.01541	0.87625	9.84222e-17
	0.01538	0.87291	9.84142e-17
	0.01535	0.86957	9.84061e-17
	0.01533	0.86622	9.8398e-17
	0.0153	0.86288	9.83899e-17
	0.01527	0.85953	9.83817e-17
	0.01525	0.85619	9.83735e-17
	0.01522	0.85284	9.83652e-17
	0.0152	0.8495	9.83569e-17
	0.01517	0.84615	9.83486e-17
	0.01514	0.84281	9.83402e-17
	0.01511	0.83946	9.83318e-17
	0.01509	0.83612	9.83234e-17
	0.01506	0.83278	9.83149e-17
	0.01503	0.82943	9.83064e-17
	0.01501	0.82609	9.82978e-17
	0.01498	0.82274	9.82893e-17
	0.01495	0.8194	9.82806e-17
	0.01492	0.81605	9.8272e-17
	0.01489	0.81271	9.82633e-17
	0.01487	0.80936	9.82545e-17
	0.01484	0.80602	9.82457e-17
	0.01481	0.80268	9.82369e-17
	0.01478	0.79933	9.82281e-17
	0.01475	0.79599	9.82192e-17
	0.01472	0.79264	9.82102e-17
	0.01469	0.7893	9.82012e-17
	0.01467	0.78595	9.81922e-17
	0.01464	0.78261	9.81832e-17
	0.01461	0.77926	9.81741e-17
	0.01458	0.77592	9.81649e-17
	0.01455	0.77258	9.81557e-17
	0.01452	0.76923	9.81465e-17
	0.01449	0.76589	9.81372e-17
	0.01446	0.76254	9.81279e-17
	0.01443	0.7592	9.81185e-17
	0.0144	0.75585	9.81091e-17
	0.01437	0.75251	9.80997e-17
	0.01434	0.74916	9.80902e-17
	0.01431	0.74582	9.80807e-17
	0.01428	0.74247	9.80711e-17
	0.01424	0.73913	9.80615e-17
	0.01421	0.73579	9.80518e-17
	0.01418	0.73244	9.80421e-17
	0.01415	0.7291	9.80323e-17
	0.01412	0.72575	9.80225e-17
	0.01409	0.72241	9.80127e-17
	0.01406	0.71906	9.80028e-17
	0.01402	0.71572	9.79928e-17
	0.01399	0.71237	9.79828e-17
	0.01396	0.70903	9.79728e-17
	0.01393	0.70569	9.79627e-17
	0.01389	0.70234	9.79526e-17
	0.01386	0.699	9.79424e-17
	0.01383	0.69565	9.79321e-17
	0.0138	0.69231	9.79218e-17
	0.01376	0.68896	9.79115e-17
	0.01373	0.68562	9.79011e-17
	0.0137	0.68227	9.78907e-17
	0.01366	0.67893	9.78802e-17
	0.01363	0.67559	9.78696e-17
	0.01359	0.67224	9.78591e-17
	0.01356	0.6689	9.78484e-17
	0.01353	0.66555	9.78377e-17
	0.01349	0.66221	9.7827e-17
	0.01346	0.65886	9.78162e-17
	0.01342	0.65552	9.78053e-17
	0.01339	0.65217	9.77944e-17
	0.01335	0.64883	9.77834e-17
	0.01331	0.64548	9.77724e-17
	0.01328	0.64214	9.77613e-17
	0.01324	0.6388	9.77502e-17
	0.01321	0.63545	9.7739e-17
	0.01317	0.63211	9.77277e-17
	0.01313	0.62876	9.77164e-17
	0.0131	0.62542	9.77051e-17
	0.01306	0.62207	9.76937e-17
	0.01302	0.61873	9.76822e-17
	0.01299	0.61538	9.76706e-17
	0.01295	0.61204	9.7659e-17
	0.01291	0.6087	9.76474e-17
	0.01288	0.60535	9.76357e-17
	0.01284	0.60201	9.76239e-17
	0.0128	0.59866	9.76121e-17
	0.01276	0.59532	9.76002e-17
	0.01272	0.59197	9.75882e-17
	0.01268	0.58863	9.75762e-17
	0.01264	0.58528	9.75641e-17
	0.01261	0.58194	9.75519e-17
	0.01257	0.5786	9.75397e-17
	0.01253	0.57525	9.75274e-17
	0.01249	0.57191	9.75151e-17
	0.01245	0.56856	9.75027e-17
	0.01241	0.56522	9.74902e-17
	0.01237	0.56187	9.74776e-17
	0.01233	0.55853	9.7465e-17
	0.01229	0.55518	9.74523e-17
	0.01224	0.55184	9.74396e-17
	0.0122	0.5485	9.74268e-17
	0.01216	0.54515	9.74139e-17
	0.01212	0.54181	9.74009e-17
	0.01208	0.53846	9.73879e-17
	0.01204	0.53512	9.73748e-17
	0.01199	0.53177	9.73616e-17
	0.01195	0.52843	9.73484e-17
	0.01191	0.52508	9.7335e-17
	0.01186	0.52174	9.73216e-17
	0.01182	0.51839	9.73082e-17
	0.01178	0.51505	9.72946e-17
	0.01173	0.51171	9.7281e-17
	0.01169	0.50836	9.72673e-17
	0.01165	0.50502	9.72536e-17
	0.0116	0.50167	9.72397e-17
	0.01156	0.49833	9.72258e-17
	0.01151	0.49498	9.72118e-17
	0.01147	0.49164	9.71977e-17
	0.01142	0.48829	9.71835e-17
	0.01137	0.48495	9.71693e-17
	0.01133	0.48161	9.71549e-17
	0.01128	0.47826	9.71405e-17
	0.01124	0.47492	9.7126e-17
	0.01119	0.47157	9.71115e-17
	0.01114	0.46823	9.70968e-17
	0.01109	0.46488	9.70821e-17
	0.01105	0.46154	9.70672e-17
	0.011	0.45819	9.70523e-17
	0.01095	0.45485	9.70373e-17
	0.0109	0.45151	9.70222e-17
	0.01085	0.44816	9.7007e-17
	0.0108	0.44482	9.69917e-17
	0.01075	0.44147	9.69764e-17
	0.0107	0.43813	9.69609e-17
	0.01065	0.43478	9.69454e-17
	0.0106	0.43144	9.69297e-17
	0.01055	0.42809	9.6914e-17
	0.0105	0.42475	9.68982e-17
	0.01045	0.4214	9.68822e-17
	0.0104	0.41806	9.68662e-17
	0.01035	0.41472	9.68501e-17
	0.0103	0.41137	9.68339e-17
	0.01024	0.40803	9.68176e-17
	0.01019	0.40468	9.68011e-17
	0.01014	0.40134	9.67846e-17
	0.01008	0.39799	9.6768e-17
	0.01003	0.39465	9.67513e-17
	0.00998	0.3913	9.67344e-17
	0.00992	0.38796	9.67175e-17
	0.00987	0.38462	9.67005e-17
	0.00981	0.38127	9.66833e-17
	0.00976	0.37793	9.66661e-17
	0.0097	0.37458	9.66487e-17
	0.00964	0.37124	9.66312e-17
	0.00959	0.36789	9.66137e-17
	0.00953	0.36455	9.6596e-17
	0.00947	0.3612	9.65782e-17
	0.00942	0.35786	9.65602e-17
	0.00936	0.35452	9.65422e-17
	0.0093	0.35117	9.65241e-17
	0.00924	0.34783	9.65058e-17
	0.00918	0.34448	9.64874e-17
	0.00912	0.34114	9.64689e-17
	0.00906	0.33779	9.64503e-17
	0.009	0.33445	9.64315e-17
	0.00894	0.3311	9.64126e-17
	0.00888	0.32776	9.63936e-17
	0.00882	0.32441	9.63745e-17
	0.00876	0.32107	9.63553e-17
	0.00869	0.31773	9.63359e-17
	0.00863	0.31438	9.63164e-17
	0.00857	0.31104	9.62967e-17
	0.0085	0.30769	9.6277e-17
	0.00844	0.30435	9.62571e-17
	0.00838	0.301	9.6237e-17
	0.00831	0.29766	9.62168e-17
	0.00825	0.29431	9.61965e-17
	0.00818	0.29097	9.61761e-17
	0.00811	0.28763	9.61555e-17
	0.00805	0.28428	9.61347e-17
	0.00798	0.28094	9.61139e-17
	0.00791	0.27759	9.60928e-17
	0.00784	0.27425	9.60717e-17
	0.00778	0.2709	9.60503e-17
	0.00771	0.26756	9.60289e-17
	0.00764	0.26421	9.60073e-17
	0.00757	0.26087	9.59855e-17
	0.0075	0.25753	9.59636e-17
	0.00743	0.25418	9.59415e-17
	0.00735	0.25084	9.59192e-17
	0.00728	0.24749	9.58968e-17
	0.00721	0.24415	9.58743e-17
	0.00714	0.2408	9.58516e-17
	0.00706	0.23746	9.58287e-17
	0.00699	0.23411	9.58056e-17
	0.00691	0.23077	9.57824e-17
	0.00684	0.22742	9.5759e-17
	0.00676	0.22408	9.57354e-17
	0.00669	0.22074	9.57117e-17
	0.00661	0.21739	9.56878e-17
	0.00653	0.21405	9.56637e-17
	0.00645	0.2107	9.56394e-17
	0.00637	0.20736	9.5615e-17
	0.0063	0.20401	9.55903e-17
	0.00622	0.20067	9.55655e-17
	0.00614	0.19732	9.55405e-17
	0.00605	0.19398	9.55153e-17
	0.00597	0.19064	9.54899e-17
	0.00589	0.18729	9.54643e-17
	0.00581	0.18395	9.54385e-17
	0.00572	0.1806	9.54125e-17
	0.00564	0.17726	9.53864e-17
	0.00555	0.17391	9.536e-17
	0.00547	0.17057	9.53334e-17
	0.00538	0.16722	9.53066e-17
	0.0053	0.16388	9.52796e-17
	0.00521	0.16054	9.52523e-17
	0.00512	0.15719	9.52249e-17
	0.00503	0.15385	9.51972e-17
	0.00494	0.1505	9.51693e-17
	0.00485	0.14716	9.51412e-17
	0.00476	0.14381	9.51129e-17
	0.00467	0.14047	9.50843e-17
	0.00458	0.13712	9.50555e-17
	0.00448	0.13378	9.50265e-17
	0.00439	0.13043	9.49973e-17
	0.00429	0.12709	9.49677e-17
	0.0042	0.12375	9.4938e-17
	0.0041	0.1204	9.4908e-17
	0.004	0.11706	9.48777e-17
	0.00391	0.11371	9.48472e-17
	0.00381	0.11037	9.48165e-17
	0.00371	0.10702	9.47855e-17
	0.00361	0.10368	9.47542e-17
	0.0035	0.10033	9.47226e-17
	0.0034	0.09699	9.46908e-17
	0.0033	0.09365	9.46587e-17
	0.00319	0.0903	9.46264e-17
	0.00309	0.08696	9.45937e-17
	0.00298	0.08361	9.45608e-17
	0.00288	0.08027	9.45276e-17
	0.00277	0.07692	9.44941e-17
	0.00266	0.07358	9.44603e-17
	0.00255	0.07023	9.44262e-17
	0.00244	0.06689	9.43918e-17
	0.00233	0.06355	9.43571e-17
	0.00222	0.0602	9.4322e-17
	0.0021	0.05686	9.42867e-17
	0.00199	0.05351	9.4251e-17
	0.00187	0.05017	9.42151e-17
	0.00175	0.04682	9.41788e-17
	0.00164	0.04348	9.41421e-17
	0.00152	0.04013	9.41051e-17
	0.0014	0.03679	9.40678e-17
	0.00128	0.03344	9.40301e-17
	0.00115	0.0301	9.39921e-17
	0.00103	0.02676	9.39538e-17
	0.000906338	0.02341	9.3915e-17
	0.000780541	0.02007	9.38759e-17
	0.000653547	0.01672	9.38364e-17
	0.000525338	0.01338	9.37966e-17
	0.000395898	0.01003	9.37563e-17
	0.000265207	0.00669	9.37157e-17
	0.000133249	0.00334	9.36747e-17
	4.00344e-09	1e-07	9.36333e-17
	0.01955	1	1.49565e-16
	0.01952	0.99666	1.49553e-16
	0.0195	0.99331	1.49541e-16
	0.01947	0.98997	1.49528e-16
	0.01944	0.98662	1.49515e-16
	0.01941	0.98328	1.49503e-16
	0.01939	0.97993	1.4949e-16
	0.01936	0.97659	1.49477e-16
	0.01933	0.97324	1.49465e-16
	0.01931	0.9699	1.49452e-16
	0.01928	0.96656	1.49439e-16
	0.01925	0.96321	1.49426e-16
	0.01922	0.95987	1.49413e-16
	0.01919	0.95652	1.494e-16
	0.01917	0.95318	1.49387e-16
	0.01914	0.94983	1.49374e-16
	0.01911	0.94649	1.4936e-16
	0.01908	0.94314	1.49347e-16
	0.01905	0.9398	1.49334e-16
	0.01902	0.93645	1.4932e-16
	0.01899	0.93311	1.49307e-16
	0.01897	0.92977	1.49294e-16
	0.01894	0.92642	1.4928e-16
	0.01891	0.92308	1.49266e-16
	0.01888	0.91973	1.49253e-16
	0.01885	0.91639	1.49239e-16
	0.01882	0.91304	1.49225e-16
	0.01879	0.9097	1.49212e-16
	0.01876	0.90635	1.49198e-16
	0.01873	0.90301	1.49184e-16
	0.0187	0.89967	1.4917e-16
	0.01867	0.89632	1.49156e-16
	0.01864	0.89298	1.49142e-16
	0.01861	0.88963	1.49127e-16
	0.01858	0.88629	1.49113e-16
	0.01855	0.88294	1.49099e-16
	0.01852	0.8796	1.49084e-16
	0.01849	0.87625	1.4907e-16
	0.01846	0.87291	1.49056e-16
	0.01842	0.86957	1.49041e-16
	0.01839	0.86622	1.49026e-16
	0.01836	0.86288	1.49012e-16
	0.01833	0.85953	1.48997e-16
	0.0183	0.85619	1.48982e-16
	0.01827	0.85284	1.48967e-16
	0.01823	0.8495	1.48952e-16
	0.0182	0.84615	1.48937e-16
	0.01817	0.84281	1.48922e-16
	0.01814	0.83946	1.48907e-16
	0.0181	0.83612	1.48892e-16
	0.01807	0.83278	1.48877e-16
	0.01804	0.82943	1.48862e-16
	0.01801	0.82609	1.48846e-16
	0.01797	0.82274	1.48831e-16
	0.01794	0.8194	1.48815e-16
	0.01791	0.81605	1.488e-16
	0.01787	0.81271	1.48784e-16
	0.01784	0.80936	1.48768e-16
	0.01781	0.80602	1.48752e-16
	0.01777	0.80268	1.48736e-16
	0.01774	0.79933	1.48721e-16
	0.0177	0.79599	1.48705e-16
	0.01767	0.79264	1.48688e-16
	0.01763	0.7893	1.48672e-16
	0.0176	0.78595	1.48656e-16
	0.01756	0.78261	1.4864e-16
	0.01753	0.77926	1.48623e-16
	0.01749	0.77592	1.48607e-16
	0.01746	0.77258	1.4859e-16
	0.01742	0.76923	1.48574e-16
	0.01739	0.76589	1.48557e-16
	0.01735	0.76254	1.4854e-16
	0.01731	0.7592	1.48523e-16
	0.01728	0.75585	1.48506e-16
	0.01724	0.75251	1.48489e-16
	0.0172	0.74916	1.48472e-16
	0.01717	0.74582	1.48455e-16
	0.01713	0.74247	1.48438e-16
	0.01709	0.73913	1.48421e-16
	0.01706	0.73579	1.48403e-16
	0.01702	0.73244	1.48386e-16
	0.01698	0.7291	1.48368e-16
	0.01694	0.72575	1.48351e-16
	0.01691	0.72241	1.48333e-16
	0.01687	0.71906	1.48315e-16
	0.01683	0.71572	1.48297e-16
	0.01679	0.71237	1.48279e-16
	0.01675	0.70903	1.48261e-16
	0.01671	0.70569	1.48243e-16
	0.01667	0.70234	1.48225e-16
	0.01663	0.699	1.48206e-16
	0.01659	0.69565	1.48188e-16
	0.01655	0.69231	1.48169e-16
	0.01651	0.68896	1.48151e-16
	0.01647	0.68562	1.48132e-16
	0.01643	0.68227	1.48113e-16
	0.01639	0.67893	1.48094e-16
	0.01635	0.67559	1.48075e-16
	0.01631	0.67224	1.48056e-16
	0.01627	0.6689	1.48037e-16
	0.01623	0.66555	1.48018e-16
	0.01619	0.66221	1.47999e-16
	0.01615	0.65886	1.47979e-16
	0.0161	0.65552	1.4796e-16
	0.01606	0.65217	1.4794e-16
	0.01602	0.64883	1.4792e-16
	0.01598	0.64548	1.479e-16
	0.01594	0.64214	1.4788e-16
	0.01589	0.6388	1.4786e-16
	0.01585	0.63545	1.4784e-16
	0.01581	0.63211	1.4782e-16
	0.01576	0.62876	1.478e-16
	0.01572	0.62542	1.47779e-16
	0.01567	0.62207	1.47759e-16
	0.01563	0.61873	1.47738e-16
	0.01559	0.61538	1.47717e-16
	0.01554	0.61204	1.47696e-16
	0.0155	0.6087	1.47675e-16
	0.01545	0.60535	1.47654e-16
	0.0154	0.60201	1.47633e-16
	0.01536	0.59866	1.47612e-16
	0.01531	0.59532	1.4759e-16
	0.01527	0.59197	1.47569e-16
	0.01522	0.58863	1.47547e-16
	0.01517	0.58528	1.47525e-16
	0.01513	0.58194	1.47503e-16
	0.01508	0.5786	1.47481e-16
	0.01503	0.57525	1.47459e-16
	0.01498	0.57191	1.47437e-16
	0.01494	0.56856	1.47415e-16
	0.01489	0.56522	1.47392e-16
	0.01484	0.56187	1.4737e-16
	0.01479	0.55853	1.47347e-16
	0.01474	0.55518	1.47324e-16
	0.01469	0.55184	1.47301e-16
	0.01464	0.5485	1.47278e-16
	0.01459	0.54515	1.47255e-16
	0.01454	0.54181	1.47232e-16
	0.01449	0.53846	1.47208e-16
	0.01444	0.53512	1.47185e-16
	0.01439	0.53177	1.47161e-16
	0.01434	0.52843	1.47137e-16
	0.01429	0.52508	1.47113e-16
	0.01424	0.52174	1.47089e-16
	0.01419	0.51839	1.47065e-16
	0.01413	0.51505	1.4704e-16
	0.01408	0.51171	1.47016e-16
	0.01403	0.50836	1.46991e-16
	0.01398	0.50502	1.46966e-16
	0.01392	0.50167	1.46941e-16
	0.01387	0.49833	1.46916e-16
	0.01381	0.49498	1.46891e-16
	0.01376	0.49164	1.46866e-16
	0.0137	0.48829	1.4684e-16
	0.01365	0.48495	1.46815e-16
	0.01359	0.48161	1.46789e-16
	0.01354	0.47826	1.46763e-16
	0.01348	0.47492	1.46737e-16
	0.01343	0.47157	1.46711e-16
	0.01337	0.46823	1.46684e-16
	0.01331	0.46488	1.46658e-16
	0.01326	0.46154	1.46631e-16
	0.0132	0.45819	1.46604e-16
	0.01314	0.45485	1.46577e-16
	0.01308	0.45151	1.4655e-16
	0.01302	0.44816	1.46523e-16
	0.01296	0.44482	1.46495e-16
	0.01291	0.44147	1.46467e-16
	0.01285	0.43813	1.4644e-16
	0.01279	0.43478	1.46412e-16
	0.01273	0.43144	1.46384e-16
	0.01266	0.42809	1.46355e-16
	0.0126	0.42475	1.46327e-16
	0.01254	0.4214	1.46298e-16
	0.01248	0.41806	1.46269e-16
	0.01242	0.41472	1.4624e-16
	0.01236	0.41137	1.46211e-16
	0.01229	0.40803	1.46182e-16
	0.01223	0.40468	1.46152e-16
	0.01216	0.40134	1.46122e-16
	0.0121	0.39799	1.46092e-16
	0.01204	0.39465	1.46062e-16
	0.01197	0.3913	1.46032e-16
	0.01191	0.38796	1.46002e-16
	0.01184	0.38462	1.45971e-16
	0.01177	0.38127	1.4594e-16
	0.01171	0.37793	1.45909e-16
	0.01164	0.37458	1.45878e-16
	0.01157	0.37124	1.45846e-16
	0.01151	0.36789	1.45815e-16
	0.01144	0.36455	1.45783e-16
	0.01137	0.3612	1.45751e-16
	0.0113	0.35786	1.45718e-16
	0.01123	0.35452	1.45686e-16
	0.01116	0.35117	1.45653e-16
	0.01109	0.34783	1.4562e-16
[truncated: 118,004 more rows]

## Sheet: Fig. 3D
	Theoretical results								Experimental data
	0 μm CM (ι=0)		2 μm CM (ι=1.05*)		4 μm CM (ι=2.00*)		8 μm CM (ι=5.40*)		0 μm CM (ι=0)		2 μm CM (ι=1.05*)		4 μm CM (ι=2.00*)		8 μm CM (ι=5.40*)
	Obtained from analytical results combining Eqs. S85 and S160								Reference: Nature 528, 99-104 (2015)
	Growth rate (1/h)	Jacetate (mM /OD600/h)	Growth rate (1/h)	Jacetate (mM /OD600/h)	Growth rate (1/h)	Jacetate (mM /OD600/h)	Growth rate (1/h)	Jacetate (mM /OD600/h)	Growth rate (1/h)	Jacetate (mM /OD600/h)	Growth rate (1/h)	Jacetate (mM /OD600/h)	Growth rate (1/h)	Jacetate (mM /OD600/h)	Growth rate (1/h)	Jacetate (mM /OD600/h)
	0	4.68166e-17	0	4.68166e-17	0	4.68166e-17	0	4.68166e-17	0.35	-0.01	0.49	-0.02	0.45	-0.17	0.27	0
	0.01313	9.77153e-17	0.0092	9.64933e-17	0.00724	9.58838e-17	0.00411	9.491e-17	0.55	-0.01	0.55	-0.01	0.5	0.7	0.31	0.76
	0.02626	2.54493e-16	0.0184	2.48383e-16	0.01448	1.96269e-16	0.00821	1.92373e-16	0.65	-0.01	0.6	0.12	0.58	1.58	0.36	1.44
	0.03939	7.41156e-16	0.0276	6.1328e-16	0.02172	5.52116e-16	0.01232	4.87317e-16	0.76	-0.01	0.68	1.35	0.61	2.05	0.39	1.6
	0.05253	1.92432e-15	0.0368	1.52356e-15	0.02896	1.38558e-15	0.01643	1.13551e-15	0.87	0.96	0.7	1.61	0.62	2.18	0.4	1.86
	0.06566	5.18898e-15	0.046	3.8856e-15	0.0362	3.35634e-15	0.02053	2.65044e-15	0.92	2.3	0.74	2.25
	0.07879	1.35254e-14	0.0552	9.69443e-15	0.04344	8.14235e-15	0.02464	6.1789e-15	1.03	2.84
	0.09192	3.49513e-14	0.0644	2.38104e-14	0.05068	1.95255e-14	0.02875	1.41547e-14	1.16	4.15
	0.10505	8.88447e-14	0.0736	5.77907e-14	0.05792	4.62178e-14	0.03286	3.21925e-14
	0.11818	2.22544e-13	0.0828	1.38294e-13	0.06516	1.08023e-13	0.03696	7.23249e-14
	0.13131	5.4931e-13	0.092	3.26853e-13	0.0724	2.49465e-13	0.04107	1.60824e-13				* These values of the inhibition coefficient were fitted from experimental data
	0.14444	1.33597e-12	0.1012	7.62321e-13	0.07963	5.69035e-13	0.04518	3.53503e-13
	0.15758	3.20155e-12	0.1104	1.75482e-12	0.08687	1.28215e-12	0.04928	7.68558e-13
	0.17071	7.56017e-12	0.1196	3.98694e-12	0.09411	2.85368e-12	0.05339	1.65263e-12
	0.18384	1.75933e-11	0.1288	8.94124e-12	0.10135	6.27397e-12	0.0575	3.51464e-12
	0.19697	4.03478e-11	0.13801	1.97925e-11	0.10859	1.36262e-11	0.0616	7.39257e-12
	0.2101	9.11957e-11	0.14721	4.32479e-11	0.11583	2.92351e-11	0.06571	1.53789e-11
	0.22323	2.03155e-10	0.15641	9.32832e-11	0.12307	6.19641e-11	0.06982	3.16424e-11
	0.23636	4.46068e-10	0.16561	1.98621e-10	0.13031	1.29745e-10	0.07392	6.43926e-11
	0.24949	9.65406e-10	0.17481	4.17485e-10	0.13755	2.68388e-10	0.07803	1.29607e-10
	0.26263	2.05955e-09	0.18401	8.66286e-10	0.14479	5.48483e-10	0.08214	2.58017e-10
	0.27576	4.33115e-09	0.19321	1.77459e-09	0.15203	1.10739e-09	0.08625	5.08046e-10
	0.28889	8.97884e-09	0.20241	3.58887e-09	0.15927	2.20894e-09	0.09035	9.89455e-10
	0.30202	1.83501e-08	0.21161	7.16562e-09	0.16651	4.35329e-09	0.09446	1.90604e-09
	0.31515	3.69719e-08	0.22081	1.41252e-08	0.17375	8.4764e-09	0.09857	3.63173e-09
	0.32828	7.34408e-08	0.23001	2.7491e-08	0.18099	1.63069e-08	0.10267	6.84459e-09
	0.34141	1.4383e-07	0.23921	5.28265e-08	0.18823	3.09961e-08	0.10678	1.27596e-08
	0.35455	2.77728e-07	0.24841	1.00228e-07	0.19547	5.82138e-08	0.11089	2.35283e-08
	0.36768	5.28768e-07	0.25761	1.87762e-07	0.20271	1.08028e-07	0.11499	4.29151e-08
	0.38081	9.92659e-07	0.26681	3.47315e-07	0.20995	1.98081e-07	0.1191	7.74286e-08
	0.39394	1.83755e-06	0.27601	6.34372e-07	0.21719	3.58886e-07	0.12321	1.38188e-07
	0.40707	3.35425e-06	0.28521	1.14414e-06	0.22443	6.4252e-07	0.12731	2.43963e-07
	0.4202	6.03789e-06	0.29441	2.03772e-06	0.23166	1.13669e-06	0.13142	4.26055e-07
	0.43333	1.07182e-05	0.30361	3.5838e-06	0.2389	1.98714e-06	0.13553	7.36044e-07
	0.44646	1.8764e-05	0.31281	6.22432e-06	0.24614	3.43287e-06	0.13964	1.25789e-06
	0.4596	3.23971e-05	0.32201	1.06758e-05	0.25338	5.86055e-06	0.14374	2.12664e-06
	0.47273	5.51674e-05	0.33121	1.80834e-05	0.26062	9.88738e-06	0.14785	3.55679e-06
	0.48586	9.26555e-05	0.34041	3.02513e-05	0.26786	1.64853e-05	0.15196	5.88501e-06
	0.49899	0.000153493	0.34961	4.99809e-05	0.2751	2.7164e-05	0.15606	9.63312e-06
	0.51212	0.000250815	0.35881	8.15595e-05	0.28234	4.42369e-05	0.16017	1.56001e-05
	0.52525	0.000404282	0.36801	0.000131452	0.28958	7.12e-05	0.16428	2.49938e-05
	0.53838	0.000642837	0.37721	0.000209267	0.29682	0.000113264	0.16838	3.96184e-05
	0.55152	0.00101	0.38641	0.000329068	0.30406	0.000178089	0.17249	6.21335e-05
	0.56465	0.00156	0.39561	0.00051114	0.3113	0.000276773	0.1766	9.64121e-05
	0.57778	0.00238	0.40481	0.000784295	0.31854	0.000425175	0.1807	0.000148021
	0.59091	0.00359	0.41402	0.00119	0.32578	0.000645629	0.18481	0.00022486
	0.60404	0.00534	0.42322	0.00178	0.33302	0.00096914	0.18892	0.000337994
	0.61717	0.00783	0.43242	0.00263	0.34026	0.00144	0.19303	0.000502722
	0.6303	0.01133	0.44162	0.00385	0.3475	0.00211	0.19713	0.000739913
	0.64343	0.01619	0.45082	0.00556	0.35474	0.00306	0.20124	0.00108
	0.65657	0.02283	0.46002	0.00794	0.36198	0.00439	0.20535	0.00155
	0.6697	0.03177	0.46922	0.01119	0.36922	0.00622	0.20945	0.00222
	0.68283	0.04366	0.47842	0.0156	0.37646	0.00872	0.21356	0.00313
	0.69596	0.05922	0.48762	0.02148	0.38369	0.01209	0.21767	0.00437
	0.70909	0.07932	0.49682	0.02924	0.39093	0.01657	0.22177	0.00604
	0.72222	0.10491	0.50602	0.03935	0.39817	0.02247	0.22588	0.00827
	0.73535	0.13702	0.51522	0.05233	0.40541	0.03012	0.22999	0.01121
	0.74848	0.17677	0.52442	0.06882	0.41265	0.03995	0.23409	0.01503
	0.76162	0.22526	0.53362	0.08947	0.41989	0.05241	0.2382	0.01996
	0.77475	0.28361	0.54282	0.11501	0.42713	0.06801	0.24231	0.02623
	0.78788	0.35283	0.55202	0.14621	0.43437	0.08732	0.24642	0.03414
	0.80101	0.4338	0.56122	0.18382	0.44161	0.11092	0.25052	0.04399
	0.81414	0.5272	0.57042	0.2286	0.44885	0.13944	0.25463	0.05613
	0.82727	0.63345	0.57962	0.28124	0.45609	0.17346	0.25874	0.07093
	0.8404	0.75265	0.58882	0.34234	0.46333	0.21357	0.26284	0.08876
	0.85354	0.88454	0.59802	0.41236	0.47057	0.2603	0.26695	0.11002
	0.86667	1.02848	0.60722	0.49159	0.47781	0.31408	0.27106	0.13508
	0.8798	1.18342	0.61642	0.58014	0.48505	0.37525	0.27516	0.16431
	0.89293	1.34796	0.62562	0.67785	0.49229	0.44398	0.27927	0.19802
	0.90606	1.52035	0.63482	0.78436	0.49953	0.5203	0.28338	0.23646
	0.91919	1.69858	0.64402	0.89899	0.50677	0.60405	0.28748	0.27984
	0.93232	1.88043	0.65322	1.02088	0.51401	0.69486	0.29159	0.32824
	0.94545	2.06358	0.66242	1.14889	0.52125	0.79218	0.2957	0.38166
	0.95859	2.24572	0.67162	1.2817	0.52849	0.89527	0.29981	0.43999
	0.97172	2.4246	0.68083	1.41785	0.53572	1.00318	0.30391	0.50298
	0.98485	2.5982	0.69003	1.55577	0.54296	1.11487	0.30802	0.57027
	0.99798	2.76471	0.69923	1.69386	0.5502	1.22913	0.31213	0.64139
	1.01111	2.92266	0.70843	1.83053	0.55744	1.34473	0.31623	0.71575
	1.02424	3.07096	0.71763	1.96429	0.56468	1.46037	0.32034	0.79268
	1.03737	3.20886	0.72683	2.09378	0.57192	1.57479	0.32445	0.87142
	1.05051	3.33598	0.73603	2.21781	0.57916	1.6868	0.32855	0.95117
	1.06364	3.45232	0.74523	2.33544	0.5864	1.79531	0.33266	1.03112
	1.07677	3.55813	0.75443	2.44592	0.59364	1.89936	0.33677	1.11044
	1.0899	3.65395	0.76363	2.54879	0.60088	1.99818	0.34087	1.18835
	1.10303	3.74049	0.77283	2.6438	0.60812	2.09116	0.34498	1.26412
	1.11616	3.81862	0.78203	2.73094	0.61536	2.17789	0.34909	1.3371
	1.12929	3.88926	0.79123	2.81039	0.6226	2.25816	0.3532	1.40673
	1.14242	3.95337	0.80043	2.8825	0.62984	2.33192	0.3573	1.47256
	1.15556	4.01189	0.80963	2.94775	0.63708	2.39928	0.36141	1.53427
	1.16869	4.06572	0.81883	3.00673	0.64432	2.46051	0.36552	1.59163
	1.18182	4.11569	0.82803	3.06007	0.65156	2.51595	0.36962	1.64456
	1.19495	4.16251	0.83723	3.10843	0.6588	2.56606	0.37373	1.69305
	1.20808	4.20684	0.84643	3.15247	0.66604	2.61133	0.37784	1.73721
	1.22121	4.2492	0.85563	3.19282	0.67328	2.65229	0.38194	1.77722
	1.23434	4.29006	0.86483	3.23008	0.68052	2.68948	0.38605	1.81334
	1.24747	4.32977	0.87403	3.26479	0.68776	2.72341	0.39016	1.84585
	1.26061	4.36862	0.88323	3.29742	0.69499	2.75458	0.39427	1.87508
	1.27374	4.40685	0.89243	3.32839	0.70223	2.78343	0.39837	1.90138
	1.28687	4.44463	0.90163	3.35805	0.70947	2.81039	0.40248	1.92509
	1.3	4.48208	0.91083	3.38669	0.71671	2.8358	0.40659	1.94655

[truncated: 5 more sheets: Fig. 3F, Fig. 4A, Fig. 4B, Fig. 4C-D, Fig. 5 A-B]
