# Supplementary material for: Overflow metabolism originates from growth optimization and cell heterogeneity
Source: eLife. 2025 Jun 5;13:RP94586. doi: 10.7554/eLife.94586 (PMC12140630; doi:10.7554/eLife.94586)
Supplement: Source data 2. [file elife-94586-data2.xlsx]

## Sheet: Appendix 1-fig.2B
	Theoretical results						Experimental data
	Glucose+21AA		Succinate+21AA		Acetate		Glucose+21AA		Succinate+21AA		Acetate
	Obtained from Eq. S157		Obtained from Eq. S164		Obtained from Eq. S165		Reference: Cell 166, 729-739 (2016)
	Growth rate (1/h)	Probability distribution function	Growth rate (1/h)	Probability distribution function	Growth rate (1/h)	Probability distribution function	Growth rate (1/h)	Probability distribution function	Growth rate (1/h)	Probability distribution function	Growth rate (1/h)	Probability distribution function
	0	1.35776e-09	0	8.88178e-05	0	0.000233805	0.68	0.02	0.22	0.04	0.09	0.07
	0.001	1.39844e-09	0.01515	0.000141356	0.00606	0.000381266	0.75	0.04	0.27	0.1	0.1	0.17
	0.002	1.4403e-09	0.0303	0.000222579	0.01212	0.000614402	0.82	0.05	0.31	0.32	0.12	0.5
	0.003	1.48337e-09	0.04545	0.000346746	0.01818	0.000978427	0.89	0.15	0.36	0.36	0.14	1.05
	0.004	1.5277e-09	0.06061	0.000534433	0.02424	0.00154	0.96	0.25	0.4	0.72	0.16	1.39
	0.005	1.57331e-09	0.07576	0.000814951	0.0303	0.00239	1.03	0.31	0.45	1.06	0.18	2.73
	0.006	1.62024e-09	0.09091	0.00123	0.03636	0.00368	1.1	0.63	0.49	1.37	0.2	3.94
	0.007	1.66854e-09	0.10606	0.00184	0.04242	0.00559	1.16	0.82	0.54	1.9	0.21	5.11
	0.008	1.71822e-09	0.12121	0.00271	0.04848	0.00839	1.23	1.19	0.59	2.12	0.23	6.23
	0.009	1.76935e-09	0.13636	0.00396	0.05455	0.01244	1.3	1.34	0.63	2.38	0.25	6.96
	0.01	1.82195e-09	0.15152	0.00572	0.06061	0.01823	1.37	1.42	0.68	2.03	0.27	6.49
	0.011	1.87606e-09	0.16667	0.00819	0.06667	0.02641	1.44	1.65	0.72	2.74	0.29	5.48
	0.012	1.93174e-09	0.18182	0.01158	0.07273	0.0378	1.51	1.56	0.77	1.8	0.3	4.76
	0.013	1.98902e-09	0.19697	0.01621	0.07879	0.05347	1.58	1.65	0.82	1.75	0.32	3.86
	0.014	2.04795e-09	0.21212	0.02245	0.08485	0.07473	1.65	1.37	0.86	1.82	0.34	2.95
	0.01501	2.10857e-09	0.22727	0.03077	0.09091	0.10323	1.72	1.15	0.9	0.76	0.36	1.64
	0.01601	2.17093e-09	0.24242	0.04171	0.09697	0.14091	1.79	0.72	0.95	0.56	0.38	0.87
	0.01701	2.23509e-09	0.25758	0.05594	0.10303	0.19008	1.86	0.35	0.99	0.19	0.39	0.41
	0.01801	2.30108e-09	0.27273	0.07424	0.10909	0.25338	1.92	0.18	1.04	0.15	0.41	0.21
	0.01901	2.36896e-09	0.28788	0.09746	0.11515	0.33378	1.99	0.04	1.08	0.06	0.43	0.07
	0.02001	2.43878e-09	0.30303	0.12659	0.12121	0.43452	2.06	0.03	1.13	0.04	0.45	0.17
	0.02101	2.5106e-09	0.31818	0.16268	0.12727	0.55898
	0.02201	2.58447e-09	0.33333	0.20684	0.13333	0.71063
	0.02301	2.66045e-09	0.34848	0.26018	0.13939	0.89276
	0.02401	2.7386e-09	0.36364	0.3238	0.14545	1.10836
	0.02501	2.81897e-09	0.37879	0.39868	0.15152	1.35981
	0.02601	2.90163e-09	0.39394	0.48567	0.15758	1.64864
	0.02701	2.98664e-09	0.40909	0.58534	0.16364	1.97525
	0.02801	3.07406e-09	0.42424	0.69796	0.1697	2.33868
	0.02901	3.16397e-09	0.43939	0.8234	0.17576	2.73635
	0.03001	3.25642e-09	0.45455	0.96105	0.18182	3.16389
	0.03101	3.3515e-09	0.4697	1.10978	0.18788	3.61512
	0.03201	3.44927e-09	0.48485	1.2679	0.19394	4.08202
	0.03301	3.5498e-09	0.5	1.43314	0.2	4.5549
	0.03401	3.65318e-09	0.51515	1.60268	0.20606	5.02265
	0.03501	3.75947e-09	0.5303	1.77321	0.21212	5.47316
	0.03601	3.86876e-09	0.54545	1.94103	0.21818	5.89378
	0.03701	3.98113e-09	0.56061	2.10212	0.22424	6.27193
	0.03801	4.09666e-09	0.57576	2.25238	0.2303	6.59567
	0.03901	4.21545e-09	0.59091	2.3877	0.23636	6.85437
	0.04001	4.33757e-09	0.60606	2.50422	0.24242	7.03927
	0.04101	4.46313e-09	0.62121	2.5985	0.24848	7.14394
	0.04201	4.5922e-09	0.63636	2.66765	0.25455	7.16472
	0.04301	4.7249e-09	0.65152	2.70951	0.26061	7.10088
	0.04401	4.86131e-09	0.66667	2.72276	0.26667	6.95465
	0.04502	5.00153e-09	0.68182	2.70696	0.27273	6.73115
	0.04602	5.14568e-09	0.69697	2.66264	0.27879	6.43806
	0.04702	5.29385e-09	0.71212	2.59118	0.28485	6.08514
	0.04802	5.44616e-09	0.72727	2.49482	0.29091	5.68379
	0.04902	5.60271e-09	0.74242	2.37649	0.29697	5.24633
	0.05002	5.76363e-09	0.75758	2.23969	0.30303	4.78547
	0.05102	5.92902e-09	0.77273	2.08832	0.30909	4.31364
	0.05202	6.09902e-09	0.78788	1.92647	0.31515	3.84251
	0.05302	6.27373e-09	0.80303	1.75826	0.32121	3.38249
	0.05402	6.45329e-09	0.81818	1.58767	0.32727	2.94245
	0.05502	6.63784e-09	0.83333	1.41838	0.33333	2.52949
	0.05602	6.82749e-09	0.84848	1.25366	0.33939	2.14885
	0.05702	7.0224e-09	0.86364	1.09629	0.34545	1.80398
	0.05802	7.22269e-09	0.87879	0.94847	0.35152	1.49661
	0.05902	7.42852e-09	0.89394	0.81186	0.35758	1.22697
	0.06002	7.64004e-09	0.90909	0.68753	0.36364	0.99406
	0.06102	7.85738e-09	0.92424	0.57605	0.3697	0.79587
	0.06202	8.08071e-09	0.93939	0.47751	0.37576	0.62968
	0.06302	8.3102e-09	0.95455	0.39162	0.38182	0.49233
	0.06402	8.54599e-09	0.9697	0.31776	0.38788	0.38039
	0.06502	8.78827e-09	0.98485	0.25509	0.39394	0.29045
	0.06602	9.03719e-09	1	0.2026	0.4	0.21915
	0.06702	9.29295e-09	1.01515	0.1592	0.40606	0.16341
	0.06802	9.55571e-09	1.0303	0.12377	0.41212	0.12041
	0.06902	9.82567e-09	1.04545	0.0952	0.41818	0.08768
	0.07002	1.0103e-08	1.06061	0.07244	0.42424	0.06309
	0.07102	1.03879e-08	1.07576	0.05454	0.4303	0.04487
	0.07202	1.06806e-08	1.09091	0.04063	0.43636	0.03153
	0.07302	1.09813e-08	1.10606	0.02994	0.44242	0.0219
	0.07402	1.12902e-08	1.12121	0.02183	0.44848	0.01503
	0.07503	1.16075e-08	1.13636	0.01575	0.45455	0.01019
	0.07603	1.19335e-08	1.15152	0.01124	0.46061	0.00683
	0.07703	1.22683e-08	1.16667	0.00793	0.46667	0.00452
	0.07803	1.26121e-08	1.18182	0.00554	0.47273	0.00296
	0.07903	1.29654e-08	1.19697	0.00383	0.47879	0.00191
	0.08003	1.33282e-08	1.21212	0.00262	0.48485	0.00122
	0.08103	1.37008e-08	1.22727	0.00177	0.49091	0.000772882
	0.08203	1.40835e-08	1.24242	0.00119	0.49697	0.000482404
	0.08303	1.44765e-08	1.25758	0.000785584	0.50303	0.00029755
	0.08403	1.48802e-08	1.27273	0.00051469	0.50909	0.000181368
	0.08503	1.52948e-08	1.28788	0.000333622	0.51515	0.000109247
	0.08603	1.57205e-08	1.30303	0.000213954	0.52121	6.50299e-05
	0.08703	1.61577e-08	1.31818	0.00013575	0.52727	3.8253e-05
	0.08803	1.66067e-08	1.33333	8.52154e-05	0.53333	2.22366e-05
	0.08903	1.70677e-08	1.34848	5.29238e-05	0.53939	1.27739e-05
	0.09003	1.75412e-08	1.36364	3.25192e-05	0.54545	7.25152e-06
	0.09103	1.80273e-08	1.37879	1.9769e-05	0.55152	4.06804e-06
	0.09203	1.85265e-08	1.39394	1.18901e-05	0.55758	2.25524e-06
	0.09303	1.90391e-08	1.40909	7.07523e-06	0.56364	1.23552e-06
	0.09403	1.95653e-08	1.42424	4.16536e-06	0.5697	6.68899e-07
	0.09503	2.01057e-08	1.43939	2.42617e-06	0.57576	3.57866e-07
	0.09603	2.06605e-08	1.45455	1.39812e-06	0.58182	1.89204e-07
	0.09703	2.12301e-08	1.4697	7.97121e-07	0.58788	9.88538e-08
	0.09803	2.18149e-08	1.48485	4.49635e-07	0.59394	5.10395e-08
	0.09903	2.24152e-08	1.5	2.50929e-07	0.6	2.60417e-08
	0.10003	2.30316e-08	1.5	9.52195e-07	0.6	4.32323e-07
	0.10103	2.36643e-08
	0.10203	2.43139e-08
	0.10303	2.49807e-08
	0.10403	2.56652e-08
	0.10504	2.63679e-08
	0.10604	2.70891e-08
	0.10704	2.78294e-08
	0.10804	2.85893e-08
	0.10904	2.93693e-08
	0.11004	3.01698e-08
	0.11104	3.09915e-08
	0.11204	3.18347e-08
	0.11304	3.27002e-08
	0.11404	3.35884e-08
	0.11504	3.44999e-08
	0.11604	3.54354e-08
	0.11704	3.63953e-08
	0.11804	3.73804e-08
	0.11904	3.83913e-08
	0.12004	3.94286e-08
	0.12104	4.04931e-08
	0.12204	4.15852e-08
	0.12304	4.27059e-08
	0.12404	4.38557e-08
	0.12504	4.50355e-08
	0.12604	4.6246e-08
	0.12704	4.74878e-08
	0.12804	4.87619e-08
	0.12904	5.00691e-08
	0.13004	5.14101e-08
	0.13104	5.27858e-08
	0.13204	5.41971e-08
	0.13304	5.56448e-08
	0.13404	5.713e-08
	0.13505	5.86534e-08
	0.13605	6.0216e-08
	0.13705	6.18189e-08
	0.13805	6.3463e-08
	0.13905	6.51493e-08
	0.14005	6.68789e-08
	0.14105	6.86529e-08
	0.14205	7.04723e-08
	0.14305	7.23383e-08
	0.14405	7.4252e-08
	0.14505	7.62146e-08
	0.14605	7.82274e-08
	0.14705	8.02914e-08
	0.14805	8.24081e-08
	0.14905	8.45786e-08
	0.15005	8.68043e-08
	0.15105	8.90866e-08
	0.15205	9.14268e-08
	0.15305	9.38264e-08
	0.15405	9.62868e-08
	0.15505	9.88095e-08
	0.15605	1.01396e-07
	0.15705	1.04048e-07
	0.15805	1.06767e-07
	0.15905	1.09554e-07
	0.16005	1.12412e-07
	0.16105	1.15341e-07
	0.16205	1.18345e-07
	0.16305	1.21423e-07
	0.16405	1.24579e-07
	0.16506	1.27815e-07
	0.16606	1.31131e-07
	0.16706	1.3453e-07
	0.16806	1.38015e-07
	0.16906	1.41586e-07
	0.17006	1.45247e-07
	0.17106	1.48999e-07
	0.17206	1.52844e-07
	0.17306	1.56785e-07
	0.17406	1.60825e-07
	0.17506	1.64964e-07
	0.17606	1.69207e-07
	0.17706	1.73555e-07
	0.17806	1.7801e-07
	0.17906	1.82576e-07
	0.18006	1.87255e-07
	0.18106	1.92049e-07
	0.18206	1.96962e-07
	0.18306	2.01996e-07
	0.18406	2.07154e-07
	0.18506	2.12439e-07
	0.18606	2.17854e-07
	0.18706	2.23403e-07
	0.18806	2.29087e-07
	0.18906	2.34911e-07
	0.19006	2.40878e-07
	0.19106	2.46991e-07
	0.19206	2.53253e-07
	0.19306	2.59669e-07
	0.19406	2.66241e-07
	0.19507	2.72974e-07
	0.19607	2.7987e-07
	0.19707	2.86935e-07
	0.19807	2.94172e-07
	0.19907	3.01584e-07
	0.20007	3.09177e-07
	0.20107	3.16953e-07
	0.20207	3.24918e-07
	0.20307	3.33077e-07
	0.20407	3.41432e-07
	0.20507	3.4999e-07
	0.20607	3.58754e-07
	0.20707	3.67729e-07
	0.20807	3.76921e-07
	0.20907	3.86335e-07
	0.21007	3.95974e-07
	0.21107	4.05846e-07
	0.21207	4.15954e-07
	0.21307	4.26306e-07
	0.21407	4.36905e-07
	0.21507	4.47758e-07
	0.21607	4.58871e-07
	0.21707	4.70249e-07
	0.21807	4.81899e-07
	0.21907	4.93827e-07
	0.22007	5.0604e-07
	0.22107	5.18543e-07
	0.22207	5.31344e-07
	0.22307	5.44449e-07
	0.22407	5.57865e-07
	0.22508	5.716e-07
	0.22608	5.8566e-07
	0.22708	6.00053e-07
	0.22808	6.14786e-07
	0.22908	6.29868e-07
	0.23008	6.45306e-07
	0.23108	6.61108e-07
	0.23208	6.77283e-07
	0.23308	6.93838e-07
	0.23408	7.10783e-07
	0.23508	7.28127e-07
	0.23608	7.45877e-07
	0.23708	7.64044e-07
	0.23808	7.82637e-07
	0.23908	8.01665e-07
	0.24008	8.21138e-07
	0.24108	8.41066e-07
	0.24208	8.6146e-07
	0.24308	8.82329e-07
	0.24408	9.03685e-07
	0.24508	9.25537e-07
	0.24608	9.47899e-07
	0.24708	9.70779e-07
	0.24808	9.94191e-07
	0.24908	1.01815e-06
	0.25008	1.04266e-06
	0.25108	1.06773e-06
	0.25208	1.09339e-06
	0.25308	1.11964e-06
	0.25408	1.1465e-06
	0.25509	1.17397e-06
	0.25609	1.20208e-06
	0.25709	1.23084e-06
	0.25809	1.26026e-06
	0.25909	1.29035e-06
	0.26009	1.32113e-06
	0.26109	1.35262e-06
	0.26209	1.38484e-06
	0.26309	1.41778e-06
	0.26409	1.45149e-06
	0.26509	1.48596e-06
	0.26609	1.52122e-06
	0.26709	1.55728e-06
	0.26809	1.59416e-06
	0.26909	1.63189e-06
	0.27009	1.67047e-06
	0.27109	1.70993e-06
	0.27209	1.75028e-06
	0.27309	1.79155e-06
	0.27409	1.83375e-06
	0.27509	1.87691e-06
	0.27609	1.92104e-06
	0.27709	1.96617e-06
	0.27809	2.01232e-06
	0.27909	2.05951e-06
	0.28009	2.10776e-06
	0.28109	2.15709e-06
	0.28209	2.20754e-06
	0.28309	2.25912e-06
	0.28409	2.31185e-06
	0.2851	2.36577e-06
	0.2861	2.42089e-06
	0.2871	2.47725e-06
	0.2881	2.53487e-06
	0.2891	2.59377e-06
	0.2901	2.65399e-06
	0.2911	2.71554e-06
	0.2921	2.77847e-06
	0.2931	2.8428e-06
	0.2941	2.90856e-06
	0.2951	2.97577e-06
	0.2961	3.04448e-06
	0.2971	3.11471e-06
	0.2981	3.18649e-06
	0.2991	3.25986e-06
	0.3001	3.33485e-06
	0.3011	3.4115e-06
	0.3021	3.48984e-06
	0.3031	3.5699e-06
	0.3041	3.65172e-06
	0.3051	3.73534e-06
	0.3061	3.8208e-06
	0.3071	3.90813e-06
	0.3081	3.99737e-06
	0.3091	4.08857e-06
	0.3101	4.18177e-06
	0.3111	4.277e-06
	0.3121	4.37431e-06
	0.3131	4.47374e-06
	0.3141	4.57534e-06
	0.31511	4.67915e-06
	0.31611	4.78522e-06
	0.31711	4.89359e-06
	0.31811	5.00431e-06
	0.31911	5.11744e-06
	0.32011	5.23301e-06
	0.32111	5.35109e-06
	0.32211	5.47172e-06
	0.32311	5.59495e-06
	0.32411	5.72084e-06
	0.32511	5.84945e-06
	0.32611	5.98082e-06
	0.32711	6.11502e-06
	0.32811	6.25211e-06
	0.32911	6.39213e-06
	0.33011	6.53516e-06
	0.33111	6.68126e-06
	0.33211	6.83048e-06
	0.33311	6.98289e-06
	0.33411	7.13856e-06
	0.33511	7.29755e-06
	0.33611	7.45993e-06
	0.33711	7.62577e-06
	0.33811	7.79514e-06
	0.33911	7.96811e-06
	0.34011	8.14475e-06
	0.34111	8.32514e-06
	0.34211	8.50935e-06
	0.34311	8.69746e-06
	0.34411	8.88955e-06
	0.34512	9.0857e-06
	0.34612	9.28598e-06
	0.34712	9.4905e-06
	0.34812	9.69931e-06
	0.34912	9.91253e-06
	0.35012	1.01302e-05
	0.35112	1.03525e-05
	0.35212	1.05794e-05
	0.35312	1.08111e-05
	0.35412	1.10477e-05
	0.35512	1.12891e-05
	0.35612	1.15357e-05
	0.35712	1.17874e-05
	0.35812	1.20443e-05
	0.35912	1.23066e-05
	0.36012	1.25743e-05
	0.36112	1.28476e-05
	0.36212	1.31266e-05
	0.36312	1.34114e-05
	0.36412	1.3702e-05
	0.36512	1.39987e-05
	0.36612	1.43015e-05
	0.36712	1.46106e-05
	0.36812	1.49261e-05
	0.36912	1.52481e-05
	0.37012	1.55767e-05
	0.37112	1.5912e-05
	0.37212	1.62543e-05
	0.37312	1.66036e-05
	0.37412	1.69601e-05
	0.37513	1.73238e-05
	0.37613	1.7695e-05
	0.37713	1.80738e-05
	0.37813	1.84604e-05
	0.37913	1.88548e-05
	0.38013	1.92573e-05
	0.38113	1.9668e-05
	0.38213	2.0087e-05
	0.38313	2.05145e-05
	0.38413	2.09508e-05
	0.38513	2.13959e-05
	0.38613	2.185e-05
	0.38713	2.23132e-05
	0.38813	2.27859e-05
	0.38913	2.32681e-05
	0.39013	2.37601e-05
	0.39113	2.42619e-05
	0.39213	2.47739e-05
	0.39313	2.52961e-05
	0.39413	2.58289e-05
	0.39513	2.63723e-05
	0.39613	2.69267e-05
	0.39713	2.74922e-05
	0.39813	2.80689e-05
	0.39913	2.86572e-05
	0.40013	2.92573e-05
	0.40113	2.98693e-05
	0.40213	3.04935e-05
	0.40313	3.11302e-05
	0.40413	3.17795e-05
	0.40514	3.24417e-05
	0.40614	3.3117e-05
	0.40714	3.38058e-05
	0.40814	3.45081e-05
	0.40914	3.52244e-05
	0.41014	3.59548e-05
	0.41114	3.66997e-05
	0.41214	3.74592e-05
	0.41314	3.82337e-05
	0.41414	3.90234e-05
	0.41514	3.98286e-05
	0.41614	4.06497e-05
	0.41714	4.14869e-05
	0.41814	4.23404e-05
	0.41914	4.32107e-05
	0.42014	4.4098e-05
	0.42114	4.50026e-05
	0.42214	4.59249e-05
	0.42314	4.68651e-05
	0.42414	4.78237e-05
	0.42514	4.88008e-05
	0.42614	4.9797e-05
	0.42714	5.08125e-05
	0.42814	5.18477e-05
	0.42914	5.29029e-05
	0.43014	5.39785e-05
	0.43114	5.50749e-05
	0.43214	5.61925e-05
	0.43314	5.73316e-05
	0.43414	5.84927e-05
	0.43515	5.96761e-05
	0.43615	6.08822e-05
	0.43715	6.21115e-05
	0.43815	6.33644e-05
	0.43915	6.46412e-05
	0.44015	6.59425e-05
	0.44115	6.72687e-05
	0.44215	6.86201e-05
	0.44315	6.99974e-05
	0.44415	7.14009e-05
	0.44515	7.28311e-05
	0.44615	7.42884e-05
	0.44715	7.57735e-05
	0.44815	7.72867e-05
	0.44915	7.88285e-05
	0.45015	8.03996e-05
	0.45115	8.20003e-05
	0.45215	8.36313e-05
	0.45315	8.5293e-05
	0.45415	8.69861e-05
	0.45515	8.8711e-05
	0.45615	9.04683e-05
	0.45715	9.22586e-05
	0.45815	9.40825e-05
	0.45915	9.59406e-05
	0.46015	9.78335e-05
	0.46115	9.97617e-05
	0.46215	0.000101726
	0.46315	0.000103727
	0.46415	0.000105765
	0.46516	0.000107841
	0.46616	0.000109956
	0.46716	0.00011211
	0.46816	0.000114304
	0.46916	0.000116538
	0.47016	0.000118814
	0.47116	0.000121132
	0.47216	0.000123493
	0.47316	0.000125897
	0.47416	0.000128346
	0.47516	0.000130839
	0.47616	0.000133379
	0.47716	0.000135965
	0.47816	0.000138598
	0.47916	0.00014128
	0.48016	0.000144011
	0.48116	0.000146792
	0.48216	0.000149623
	0.48316	0.000152506
	0.48416	0.000155442
	0.48516	0.000158431
	0.48616	0.000161474
	0.48716	0.000164573
	0.48816	0.000167728
	0.48916	0.00017094
	0.49016	0.00017421
	0.49116	0.000177539
	0.49216	0.000180928
	0.49316	0.000184378
	0.49416	0.00018789
	0.49517	0.000191466
	0.49617	0.000195106
	0.49717	0.000198811
	0.49817	0.000202582
	0.49917	0.000206421
	0.50017	0.000210328
	0.50117	0.000214306
	0.50217	0.000218354
	0.50317	0.000222475
	0.50417	0.000226668
	0.50517	0.000230936
	0.50617	0.000235281
	0.50717	0.000239702
	0.50817	0.000244201
	0.50917	0.00024878
	0.51017	0.00025344
	0.51117	0.000258182
	0.51217	0.000263008
	0.51317	0.000267918
	0.51417	0.000272915
	0.51517	0.000278
	0.51617	0.000283174
	0.51717	0.000288439
	0.51817	0.000293795
	0.51917	0.000299246
	0.52017	0.000304791
	0.52117	0.000310434
	0.52217	0.000316174
	0.52317	0.000322015
	0.52417	0.000327957
	0.52518	0.000334002
	0.52618	0.000340151
	0.52718	0.000346408
	0.52818	0.000352772
	0.52918	0.000359247
	0.53018	0.000365833
	0.53118	0.000372532
	0.53218	0.000379347
	0.53318	0.000386279
	0.53418	0.00039333
	0.53518	0.000400502
	0.53618	0.000407797
	0.53718	0.000415216
	0.53818	0.000422762
	0.53918	0.000430437
	0.54018	0.000438243
	0.54118	0.000446181
	0.54218	0.000454255
	0.54318	0.000462465
	0.54418	0.000470815
	0.54518	0.000479306
	0.54618	0.000487941
	0.54718	0.000496722
	0.54818	0.000505651
	0.54918	0.00051473
	0.55018	0.000523962
	0.55118	0.00053335
	0.55218	0.000542895
	0.55318	0.0005526
	0.55418	0.000562467
	0.55519	0.0005725
	0.55619	0.0005827
	0.55719	0.00059307
	0.55819	0.000603613
	0.55919	0.000614332
	0.56019	0.000625228
	0.56119	0.000636306
	0.56219	0.000647567
	0.56319	0.000659015
	0.56419	0.000670652
	0.56519	0.000682481
	0.56619	0.000694506
	0.56719	0.000706728
	0.56819	0.000719151
	0.56919	0.000731779
	0.57019	0.000744614
	0.57119	0.000757659
	0.57219	0.000770918
	0.57319	0.000784393
	0.57419	0.000798089
	0.57519	0.000812008
	0.57619	0.000826153
	0.57719	0.000840529
	0.57819	0.000855138
	0.57919	0.000869984
	0.58019	0.00088507
	0.58119	0.000900401
	0.58219	0.000915979
	0.58319	0.000931809
	0.58419	0.000947894
	0.5852	0.000964237
	0.5862	0.000980844
	0.5872	0.000997717
	0.5882	0.00101
	0.5892	0.00103
	0.5902	0.00105
	0.5912	0.00107
	0.5922	0.00109
	0.5932	0.0011
	0.5942	0.00112
	0.5952	0.00114
	0.5962	0.00116
	0.5972	0.00118
	0.5982	0.0012
	0.5992	0.00122
	0.6002	0.00124
	0.6012	0.00126
	0.6022	0.00129
	0.6032	0.00131
	0.6042	0.00133
	0.6052	0.00135
	0.6062	0.00137
	0.6072	0.0014
	0.6082	0.00142
	0.6092	0.00144
	0.6102	0.00147
	0.6112	0.00149
	0.6122	0.00152
	0.6132	0.00154
	0.6142	0.00157
	0.61521	0.0016
	0.61621	0.00162
	0.61721	0.00165
	0.61821	0.00168
	0.61921	0.0017
	0.62021	0.00173
	0.62121	0.00176
	0.62221	0.00179
	0.62321	0.00182
	0.62421	0.00185
	0.62521	0.00188
	0.62621	0.00191
	0.62721	0.00194
	0.62821	0.00197
	0.62921	0.00201
	0.63021	0.00204
	0.63121	0.00207
	0.63221	0.00211
	0.63321	0.00214
	0.63421	0.00218
	0.63521	0.00221
	0.63621	0.00225
	0.63721	0.00228
	0.63821	0.00232
	0.63921	0.00236
	0.64021	0.0024
	0.64121	0.00243
	0.64221	0.00247
	0.64321	0.00251
	0.64421	0.00255
	0.64522	0.0026
	0.64622	0.00264
	0.64722	0.00268
	0.64822	0.00272
	0.64922	0.00277
	0.65022	0.00281
	0.65122	0.00285
	0.65222	0.0029
	0.65322	0.00295
	0.65422	0.00299
	0.65522	0.00304
	0.65622	0.00309
	0.65722	0.00314
	0.65822	0.00319
	0.65922	0.00324
	0.66022	0.00329
	0.66122	0.00334
	0.66222	0.00339
	0.66322	0.00345
	0.66422	0.0035
	0.66522	0.00355
	0.66622	0.00361
	0.66722	0.00367
	0.66822	0.00372
	0.66922	0.00378
	0.67022	0.00384
	0.67122	0.0039
	0.67222	0.00396
	0.67322	0.00402
	0.67422	0.00408
	0.67523	0.00415
	0.67623	0.00421
	0.67723	0.00428
	0.67823	0.00434
	0.67923	0.00441
	0.68023	0.00448
	0.68123	0.00455
	0.68223	0.00462
	0.68323	0.00469
	0.68423	0.00476
	0.68523	0.00483
	0.68623	0.0049
	0.68723	0.00498
	0.68823	0.00505
	0.68923	0.00513
	0.69023	0.00521
	0.69123	0.00529
	0.69223	0.00537
	0.69323	0.00545
	0.69423	0.00553
	0.69523	0.00561
	0.69623	0.0057
	0.69723	0.00578
	0.69823	0.00587
	0.69923	0.00596
	0.70023	0.00605
	0.70123	0.00614
	0.70223	0.00623
	0.70323	0.00632
	0.70423	0.00642
	0.70524	0.00651
	0.70624	0.00661
	0.70724	0.00671
	0.70824	0.00681
	0.70924	0.00691
	0.71024	0.00701
	0.71124	0.00711
	0.71224	0.00722
	0.71324	0.00732
	0.71424	0.00743
	0.71524	0.00754
	0.71624	0.00765
	0.71724	0.00776
	0.71824	0.00788
	0.71924	0.00799
	0.72024	0.00811
	0.72124	0.00823
	0.72224	0.00835
	0.72324	0.00847
	0.72424	0.00859
	0.72524	0.00871
	0.72624	0.00884
	0.72724	0.00897
	0.72824	0.0091
	0.72924	0.00923
	0.73024	0.00936
	0.73124	0.00949
	0.73224	0.00963
	0.73324	0.00977
	0.73424	0.00991
	0.73525	0.01005
	0.73625	0.01019
	0.73725	0.01034
	0.73825	0.01049
	0.73925	0.01063
	0.74025	0.01079
	0.74125	0.01094
	0.74225	0.01109
	0.74325	0.01125
	0.74425	0.01141
	0.74525	0.01157
	0.74625	0.01173
	0.74725	0.0119
	0.74825	0.01206
	0.74925	0.01223
	0.75025	0.0124
	0.75125	0.01258
	0.75225	0.01275
	0.75325	0.01293
	0.75425	0.01311
	0.75525	0.01329
	0.75625	0.01348
	0.75725	0.01366
	0.75825	0.01385
	0.75925	0.01404
	0.76025	0.01424
	0.76125	0.01443
	0.76225	0.01463
	0.76325	0.01483
	0.76425	0.01503
	0.76526	0.01524
	0.76626	0.01545
	0.76726	0.01566
	0.76826	0.01587
	0.76926	0.01609
	0.77026	0.01631
	0.77126	0.01653
	0.77226	0.01675
	0.77326	0.01698
	0.77426	0.01721
	0.77526	0.01744
	0.77626	0.01768
	0.77726	0.01791
	0.77826	0.01815
	0.77926	0.0184
	0.78026	0.01864
	0.78126	0.01889
	0.78226	0.01914
	0.78326	0.0194
	0.78426	0.01966
	0.78526	0.01992
	0.78626	0.02018
	0.78726	0.02045
	0.78826	0.02072
	0.78926	0.021
	0.79026	0.02127
	0.79126	0.02155
	0.79226	0.02184
	0.79326	0.02212
	0.79426	0.02241
	0.79527	0.02271
	0.79627	0.023
	0.79727	0.02331
	0.79827	0.02361
	0.79927	0.02392
	0.80027	0.02423
	0.80127	0.02454
	0.80227	0.02486
	0.80327	0.02518
	0.80427	0.02551
	0.80527	0.02584
	0.80627	0.02617
	0.80727	0.02651
	0.80827	0.02685
	0.80927	0.02719
	0.81027	0.02754
	0.81127	0.02789
	0.81227	0.02825
	0.81327	0.02861
	0.81427	0.02897
	0.81527	0.02934
	0.81627	0.02971
	0.81727	0.03009
	0.81827	0.03047
	0.81927	0.03085
	0.82027	0.03124
	0.82127	0.03163
	0.82227	0.03203
	0.82327	0.03243
	0.82427	0.03284
	0.82528	0.03325
	0.82628	0.03366
	0.82728	0.03408
	0.82828	0.03451
	0.82928	0.03494
	0.83028	0.03537
	0.83128	0.03581
	0.83228	0.03625
	0.83328	0.0367
	0.83428	0.03715
	0.83528	0.03761
	0.83628	0.03807
	0.83728	0.03854
	0.83828	0.03901
	0.83928	0.03949
	0.84028	0.03997
	0.84128	0.04046
	0.84228	0.04095
	0.84328	0.04145
	0.84428	0.04195
	0.84528	0.04246
	0.84628	0.04297
	0.84728	0.04349
	0.84828	0.04402
	0.84928	0.04455
	0.85028	0.04508
	0.85128	0.04562
	0.85228	0.04617
	0.85328	0.04672
	0.85428	0.04728
	0.85529	0.04784
	0.85629	0.04841
	0.85729	0.04898
	0.85829	0.04957
	0.85929	0.05015
	0.86029	0.05075
	0.86129	0.05134
	0.86229	0.05195
	0.86329	0.05256
	0.86429	0.05318
	0.86529	0.0538
	0.86629	0.05443
	0.86729	0.05507
	0.86829	0.05571
	0.86929	0.05636
	0.87029	0.05701
	0.87129	0.05767
	0.87229	0.05834
	0.87329	0.05901
	0.87429	0.0597
	0.87529	0.06038
	0.87629	0.06108
	0.87729	0.06178
	0.87829	0.06249
	0.87929	0.0632
	0.88029	0.06393
	0.88129	0.06465
	0.88229	0.06539
	0.88329	0.06613
	0.88429	0.06688
	0.8853	0.06764
	0.8863	0.06841
	0.8873	0.06918
	0.8883	0.06996
	0.8893	0.07075
	0.8903	0.07154
	0.8913	0.07234
	0.8923	0.07315
	0.8933	0.07397
	0.8943	0.07479
	0.8953	0.07562
	0.8963	0.07647
	0.8973	0.07731
	0.8983	0.07817
	0.8993	0.07903
	0.9003	0.0799
	0.9013	0.08078
	0.9023	0.08167
	0.9033	0.08257
	0.9043	0.08347
	0.9053	0.08439
	0.9063	0.08531
	0.9073	0.08624
	0.9083	0.08717
	0.9093	0.08812
	0.9103	0.08908
	0.9113	0.09004
	0.9123	0.09101
	0.9133	0.09199
	0.9143	0.09298
	0.91531	0.09398
	0.91631	0.09499
	0.91731	0.096
	0.91831	0.09703
	0.91931	0.09806
	0.92031	0.09911
	0.92131	0.10016
	0.92231	0.10122
	0.92331	0.10229
	0.92431	0.10337
	0.92531	0.10446
	0.92631	0.10556
	0.92731	0.10667
	0.92831	0.10779
	0.92931	0.10891
	0.93031	0.11005
	0.93131	0.1112
	0.93231	0.11235
	0.93331	0.11352
	0.93431	0.1147
	0.93531	0.11588
	0.93631	0.11708
	0.93731	0.11829
	0.93831	0.1195
	0.93931	0.12073
	0.94031	0.12197
	0.94131	0.12322
	0.94231	0.12447
	0.94331	0.12574
	0.94431	0.12702
	0.94532	0.12831
	0.94632	0.12961
	0.94732	0.13092
	0.94832	0.13224
	0.94932	0.13357
	0.95032	0.13491
	0.95132	0.13627
	0.95232	0.13763
	0.95332	0.13901
	0.95432	0.14039
	0.95532	0.14179
	0.95632	0.1432
	0.95732	0.14462
	0.95832	0.14605
	0.95932	0.14749
	0.96032	0.14894
	0.96132	0.15041
	0.96232	0.15188
	0.96332	0.15337
	0.96432	0.15487
	0.96532	0.15638
	0.96632	0.1579
	0.96732	0.15944
	0.96832	0.16098
	0.96932	0.16254
	0.97032	0.16411
	0.97132	0.16569
	0.97232	0.16729
	0.97332	0.16889
	0.97432	0.17051
	0.97533	0.17214
	0.97633	0.17378
	0.97733	0.17544
	0.97833	0.1771
	0.97933	0.17878
	0.98033	0.18047
	0.98133	0.18218
	0.98233	0.18389
	0.98333	0.18562
	0.98433	0.18736
	0.98533	0.18912
	0.98633	0.19089
	0.98733	0.19267
	0.98833	0.19446
	0.98933	0.19626
	0.99033	0.19808
	0.99133	0.19991
	0.99233	0.20176
	0.99333	0.20361
	0.99433	0.20549
	0.99533	0.20737
	0.99633	0.20927
	0.99733	0.21118
	0.99833	0.2131
	0.99933	0.21504
	1.00033	0.21699
	1.00133	0.21895
	1.00233	0.22093
	1.00333	0.22292
	1.00433	0.22492
	1.00534	0.22694
	1.00634	0.22897
	1.00734	0.23102
	1.00834	0.23307
	1.00934	0.23515
	1.01034	0.23723
	1.01134	0.23933
	1.01234	0.24145
	1.01334	0.24358
	1.01434	0.24572
	1.01534	0.24787
	1.01634	0.25004
	1.01734	0.25223
	1.01834	0.25443
	1.01934	0.25664
	1.02034	0.25887
	1.02134	0.26111
	1.02234	0.26336
	1.02334	0.26563
	1.02434	0.26792
	1.02534	0.27021
	1.02634	0.27253
	1.02734	0.27485
	1.02834	0.2772
	1.02934	0.27955
	1.03034	0.28192
	1.03134	0.28431
	1.03234	0.28671
	1.03334	0.28912
	1.03434	0.29155
	1.03535	0.294
	1.03635	0.29645
	1.03735	0.29893
	1.03835	0.30142
	1.03935	0.30392
	1.04035	0.30644
	1.04135	0.30897
	1.04235	0.31152
	1.04335	0.31408
	1.04435	0.31666
	1.04535	0.31925
	1.04635	0.32186
	1.04735	0.32448
	1.04835	0.32712
	1.04935	0.32977
	1.05035	0.33244
	1.05135	0.33512
	1.05235	0.33782
	1.05335	0.34053
	1.05435	0.34326
	1.05535	0.346
	1.05635	0.34876
	1.05735	0.35153
	1.05835	0.35432
	1.05935	0.35712
	1.06035	0.35994
	1.06135	0.36277
	1.06235	0.36562
	1.06335	0.36849
	1.06435	0.37137
	1.06536	0.37426
	1.06636	0.37717
	1.06736	0.3801
	1.06836	0.38304
	1.06936	0.38599
	1.07036	0.38896
	1.07136	0.39195
	1.07236	0.39495
	1.07336	0.39797
	1.07436	0.401
	1.07536	0.40405
	1.07636	0.40711
	1.07736	0.41019
	1.07836	0.41328
	1.07936	0.41639
	1.08036	0.41951
	1.08136	0.42265
	1.08236	0.4258
	1.08336	0.42897
	1.08436	0.43216
	1.08536	0.43536
	1.08636	0.43857
	1.08736	0.4418
	1.08836	0.44505
	1.08936	0.44831
	1.09036	0.45158
	1.09136	0.45487
	1.09236	0.45818
	1.09336	0.4615
	1.09436	0.46483
	1.09537	0.46818
	1.09637	0.47155
	1.09737	0.47493
	1.09837	0.47832
	1.09937	0.48173
	1.10037	0.48516
	1.10137	0.4886
	1.10237	0.49205
	1.10337	0.49552
	1.10437	0.499
	1.10537	0.5025
	1.10637	0.50602
	1.10737	0.50955
	1.10837	0.51309
	1.10937	0.51665
	1.11037	0.52022
	1.11137	0.5238
	1.11237	0.5274
	1.11337	0.53102
	1.11437	0.53465
	1.11537	0.53829
	1.11637	0.54195
	1.11737	0.54563
	1.11837	0.54931
	1.11937	0.55301
	1.12037	0.55673
	1.12137	0.56046
	1.12237	0.5642
	1.12337	0.56796
	1.12437	0.57173
	1.12538	0.57551
	1.12638	0.57931
	1.12738	0.58313
	1.12838	0.58695
	1.12938	0.59079
	1.13038	0.59464
	1.13138	0.59851
	1.13238	0.60239
	1.13338	0.60629
	1.13438	0.61019
	1.13538	0.61411
	1.13638	0.61805
	1.13738	0.62199
	1.13838	0.62595
	1.13938	0.62992
	1.14038	0.63391
	1.14138	0.63791
	1.14238	0.64192
	1.14338	0.64594
	1.14438	0.64998
	1.14538	0.65403
	1.14638	0.65809
	1.14738	0.66216
	1.14838	0.66625
	1.14938	0.67035
	1.15038	0.67446
	1.15138	0.67858
	1.15238	0.68271
	1.15338	0.68686
	1.15438	0.69102
	1.15539	0.69519
	1.15639	0.69937
	1.15739	0.70356
	1.15839	0.70776
	1.15939	0.71198
	1.16039	0.7162
	1.16139	0.72044
	1.16239	0.72469
	1.16339	0.72895
	1.16439	0.73322
	1.16539	0.7375
	1.16639	0.74179
	1.16739	0.74609
	1.16839	0.7504
	1.16939	0.75472
	1.17039	0.75906
	1.17139	0.7634
	1.17239	0.76775
	1.17339	0.77211
	1.17439	0.77648
	1.17539	0.78087
	1.17639	0.78526
	1.17739	0.78966
	1.17839	0.79407
	1.17939	0.79848
	1.18039	0.80291
	1.18139	0.80735
	1.18239	0.81179
	1.18339	0.81625
	1.18439	0.82071
	1.1854	0.82518
	1.1864	0.82966
	1.1874	0.83415
	1.1884	0.83864
	1.1894	0.84314
	1.1904	0.84765
	1.1914	0.85217
	1.1924	0.8567
	1.1934	0.86123
	1.1944	0.86577
	1.1954	0.87031
	1.1964	0.87487
	1.1974	0.87943
	1.1984	0.884
	1.1994	0.88857
	1.2004	0.89315
	1.2014	0.89773
	1.2024	0.90233
	1.2034	0.90692
	1.2044	0.91153
	1.2054	0.91614
	1.2064	0.92075
	1.2074	0.92537
	1.2084	0.93
	1.2094	0.93462
	1.2104	0.93926
	1.2114	0.9439
	1.2124	0.94854
	1.2134	0.95319
	1.2144	0.95784
	1.21541	0.9625
	1.21641	0.96716
	1.21741	0.97182
	1.21841	0.97649
	1.21941	0.98116
	1.22041	0.98583
	1.22141	0.99051
	1.22241	0.99519
	1.22341	0.99987
	1.22441	1.00455
	1.22541	1.00924
	1.22641	1.01393
	1.22741	1.01862
	1.22841	1.02332
	1.22941	1.02801
	1.23041	1.03271
	1.23141	1.0374
	1.23241	1.0421
	1.23341	1.0468
	1.23441	1.0515
	1.23541	1.0562
	1.23641	1.0609
	1.23741	1.0656
	1.23841	1.07031
	1.23941	1.07501
	1.24041	1.07971
	1.24141	1.08441
	1.24241	1.08911
	1.24341	1.09381
	1.24441	1.0985
	1.24542	1.1032
	1.24642	1.10789
	1.24742	1.11259
	1.24842	1.11728
	1.24942	1.12197
	1.25042	1.12666
	1.25142	1.13134
	1.25242	1.13602
	1.25342	1.1407
	1.25442	1.14538
	1.25542	1.15005
	1.25642	1.15472
	1.25742	1.15939
	1.25842	1.16405
	1.25942	1.16871
	1.26042	1.17336
	1.26142	1.17801
	1.26242	1.18266
	1.26342	1.1873
	1.26442	1.19194
	1.26542	1.19657
	1.26642	1.20119
	1.26742	1.20581
	1.26842	1.21042
	1.26942	1.21503
	1.27042	1.21963
	1.27142	1.22423
	1.27242	1.22882
	1.27342	1.2334
	1.27442	1.23798
	1.27543	1.24254
	1.27643	1.2471
	1.27743	1.25166
	1.27843	1.2562
	1.27943	1.26074
	1.28043	1.26527
	1.28143	1.26979
	1.28243	1.2743
	1.28343	1.2788
	1.28443	1.2833
	1.28543	1.28778
	1.28643	1.29226
	1.28743	1.29672
	1.28843	1.30118
	1.28943	1.30563
	1.29043	1.31006
	1.29143	1.31449
	1.29243	1.3189
	1.29343	1.3233
	1.29443	1.3277
	1.29543	1.33208
	1.29643	1.33645
	1.29743	1.34081
	1.29843	1.34515
	1.29943	1.34949
	1.30043	1.35381
	1.30143	1.35812
	1.30243	1.36241
	1.30343	1.36669
	1.30443	1.37096
	1.30544	1.37522
	1.30644	1.37946
	1.30744	1.38369
	1.30844	1.38791
	1.30944	1.39211
	1.31044	1.3963
	1.31144	1.40047
	1.31244	1.40462
	1.31344	1.40877
	1.31444	1.41289
	1.31544	1.417
	1.31644	1.4211
	1.31744	1.42518
	1.31844	1.42924
	1.31944	1.43329
	1.32044	1.43732
	1.32144	1.44134
	1.32244	1.44533
	1.32344	1.44931
	1.32444	1.45328
	1.32544	1.45722
	1.32644	1.46115
	1.32744	1.46506
	1.32844	1.46895
	1.32944	1.47283
	1.33044	1.47668
	1.33144	1.48052
	1.33244	1.48434
	1.33344	1.48813
	1.33444	1.49191
	1.33545	1.49567
	1.33645	1.49941
	1.33745	1.50313
	1.33845	1.50683
	1.33945	1.51051
	1.34045	1.51417
	1.34145	1.51781
	1.34245	1.52143
	1.34345	1.52503
	1.34445	1.5286
	1.34545	1.53216
	1.34645	1.53569
	1.34745	1.5392
	1.34845	1.54269
	1.34945	1.54616
	1.35045	1.5496
	1.35145	1.55302
	1.35245	1.55642
	1.35345	1.5598
	1.35445	1.56315
	1.35545	1.56648
	1.35645	1.56979
	1.35745	1.57307
	1.35845	1.57633
	1.35945	1.57957
	1.36045	1.58278
	1.36145	1.58597
	1.36245	1.58913
	1.36345	1.59227
	1.36445	1.59538
	1.36546	1.59847
	1.36646	1.60153
	1.36746	1.60457
	1.36846	1.60758
	1.36946	1.61057
	1.37046	1.61353
	1.37146	1.61646
	1.37246	1.61937
	1.37346	1.62225
	1.37446	1.62511
	1.37546	1.62794
	1.37646	1.63074
	1.37746	1.63352
	1.37846	1.63627
	1.37946	1.63899
	1.38046	1.64168
	1.38146	1.64435
	1.38246	1.64699
	1.38346	1.6496
	1.38446	1.65218
	1.38546	1.65473
	1.38646	1.65726
	1.38746	1.65976
	1.38846	1.66223
	1.38946	1.66467
	1.39046	1.66708
	1.39146	1.66946
	1.39246	1.67182
	1.39346	1.67414
	1.39446	1.67644
	1.39547	1.6787
	1.39647	1.68094
	1.39747	1.68315
	1.39847	1.68532
	1.39947	1.68747
	1.40047	1.68959
	1.40147	1.69167
	1.40247	1.69373
	1.40347	1.69576
	1.40447	1.69775
	1.40547	1.69972
	1.40647	1.70165
	1.40747	1.70355
	1.40847	1.70542
	1.40947	1.70726
	1.41047	1.70907
	1.41147	1.71085
	1.41247	1.7126
	1.41347	1.71431
	1.41447	1.716
	1.41547	1.71765
	1.41647	1.71927
	1.41747	1.72086
	1.41847	1.72241
	1.41947	1.72394
	1.42047	1.72543
	1.42147	1.72689
	1.42247	1.72831
	1.42347	1.72971
	1.42447	1.73107
	1.42548	1.7324
	1.42648	1.7337
	1.42748	1.73496
	1.42848	1.73619
	1.42948	1.73739
	1.43048	1.73855
	1.43148	1.73969
	1.43248	1.74079
	1.43348	1.74185
	1.43448	1.74289
	1.43548	1.74388
	1.43648	1.74485
	1.43748	1.74578
	1.43848	1.74668
	1.43948	1.74755
	1.44048	1.74838
	1.44148	1.74918
	1.44248	1.74994
	1.44348	1.75068
	1.44448	1.75137
	1.44548	1.75204
	1.44648	1.75267
	1.44748	1.75326
	1.44848	1.75383
	1.44948	1.75435
	1.45048	1.75485
	1.45148	1.75531
	1.45248	1.75574
	1.45348	1.75613
	1.45448	1.75649
	1.45549	1.75681
	1.45649	1.7571
	1.45749	1.75736
	1.45849	1.75758
	1.45949	1.75777
	1.46049	1.75792
	1.46149	1.75804
	1.46249	1.75813
	1.46349	1.75818
	1.46449	1.75819
	1.46549	1.75818
	1.46649	1.75812
	1.46749	1.75804
	1.46849	1.75792
	1.46949	1.75777
	1.47049	1.75758
	1.47149	1.75736
	1.47249	1.7571
	1.47349	1.75681
	1.47449	1.75648
	1.47549	1.75613
	1.47649	1.75573
	1.47749	1.75531
	1.47849	1.75485
	1.47949	1.75435
	1.48049	1.75382
	1.48149	1.75326
	1.48249	1.75267
	1.48349	1.75203
	1.48449	1.75137
	1.4855	1.75067
	1.4865	1.74994
	1.4875	1.74918
	1.4885	1.74838
	1.4895	1.74755
	1.4905	1.74668
	1.4915	1.74578
	1.4925	1.74485
	1.4935	1.74388
	1.4945	1.74288
	1.4955	1.74185
	1.4965	1.74078
	1.4975	1.73968
	1.4985	1.73855
	1.4995	1.73738
	1.5005	1.73619
	1.5015	1.73496
	1.5025	1.73369
	1.5035	1.73239
	1.5045	1.73106
	1.5055	1.7297
	1.5065	1.72831
	1.5075	1.72688
	1.5085	1.72542
	1.5095	1.72393
	1.5105	1.72241
	1.5115	1.72085
	1.5125	1.71926
	1.5135	1.71764
	1.5145	1.71599
	1.51551	1.71431
	1.51651	1.71259
	1.51751	1.71084
	1.51851	1.70907
	1.51951	1.70726
	1.52051	1.70542
	1.52151	1.70354
	1.52251	1.70164
	1.52351	1.69971
	1.52451	1.69774
	1.52551	1.69575
	1.52651	1.69372
	1.52751	1.69167
	1.52851	1.68958
	1.52951	1.68746
	1.53051	1.68532
	1.53151	1.68314
	1.53251	1.68093
	1.53351	1.6787
	1.53451	1.67643
	1.53551	1.67413
	1.53651	1.67181
	1.53751	1.66946
	1.53851	1.66707
	1.53951	1.66466
	1.54051	1.66222
	1.54151	1.65975
	1.54251	1.65725
	1.54351	1.65472
	1.54451	1.65217
	1.54552	1.64959
	1.54652	1.64698
	1.54752	1.64434
	1.54852	1.64167
	1.54952	1.63898
	1.55052	1.63625
	1.55152	1.63351
	1.55252	1.63073
	1.55352	1.62793
	1.55452	1.6251
	1.55552	1.62224
	1.55652	1.61936
	1.55752	1.61645
	1.55852	1.61352
	1.55952	1.61056
	1.56052	1.60757
	1.56152	1.60456
	1.56252	1.60152
	1.56352	1.59846
	1.56452	1.59537
	1.56552	1.59225
	1.56652	1.58912
	1.56752	1.58595
	1.56852	1.58277
	1.56952	1.57955
	1.57052	1.57632
	1.57152	1.57306
	1.57252	1.56978
	1.57352	1.56647
	1.57452	1.56314
	1.57553	1.55979
	1.57653	1.55641
	1.57753	1.55301
	1.57853	1.54959
	1.57953	1.54614
	1.58053	1.54268
	1.58153	1.53919
	1.58253	1.53568
	1.58353	1.53214
	1.58453	1.52859
	1.58553	1.52501
	1.58653	1.52141
	1.58753	1.5178
	1.58853	1.51416
	1.58953	1.5105
	1.59053	1.50682
	1.59153	1.50312
	1.59253	1.4994
	1.59353	1.49566
	1.59453	1.4919
	1.59553	1.48812
	1.59653	1.48432
	1.59753	1.4805
	1.59853	1.47667
	1.59953	1.47281
	1.60053	1.46894
	1.60153	1.46505
	1.60253	1.46114
	1.60353	1.45721
	1.60453	1.45326
	1.60554	1.4493
	1.60654	1.44532
	1.60754	1.44132
	1.60854	1.43731
	1.60954	1.43328
	1.61054	1.42923
	1.61154	1.42516
	1.61254	1.42108
	1.61354	1.41699
	1.61454	1.41288
	1.61554	1.40875
	1.61654	1.40461
	1.61754	1.40045
	1.61854	1.39628
	1.61954	1.39209
	1.62054	1.38789
	1.62154	1.38368
	1.62254	1.37945
	1.62354	1.3752
	1.62454	1.37095
	1.62554	1.36668
	1.62654	1.36239
	1.62754	1.3581
	1.62854	1.35379
	1.62954	1.34947
	1.63054	1.34513
	1.63154	1.34079
	1.63254	1.33643
	1.63354	1.33206
	1.63454	1.32768
	1.63555	1.32329
	1.63655	1.31888
	1.63755	1.31447
	1.63855	1.31004
	1.63955	1.30561
	1.64055	1.30116
	1.64155	1.29671
	1.64255	1.29224
	1.64355	1.28777
	1.64455	1.28328
	1.64555	1.27879
	1.64655	1.27428
	1.64755	1.26977
	1.64855	1.26525
	1.64955	1.26072
	1.65055	1.25618
	1.65155	1.25164
	1.65255	1.24709
	1.65355	1.24253
	1.65455	1.23796
	1.65555	1.23338
	1.65655	1.2288
	1.65755	1.22421
	1.65855	1.21962
	1.65955	1.21501
	1.66055	1.21041
	1.66155	1.20579
	1.66255	1.20117
	1.66355	1.19655
	1.66455	1.19192
	1.66556	1.18728
	1.66656	1.18264
	1.66756	1.17799
	1.66856	1.17334
	1.66956	1.16869
	1.67056	1.16403
	1.67156	1.15937
	1.67256	1.1547
	1.67356	1.15003
	1.67456	1.14536
	1.67556	1.14068
	1.67656	1.136
	1.67756	1.13132
	1.67856	1.12664
	1.67956	1.12195
	1.68056	1.11726
	1.68156	1.11257
	1.68256	1.10788
	1.68356	1.10318
	1.68456	1.09848
	1.68556	1.09379
	1.68656	1.08909
	1.68756	1.08439
	1.68856	1.07969
	1.68956	1.07499
	1.69056	1.07029
	1.69156	1.06559
	1.69256	1.06088
	1.69356	1.05618
	1.69456	1.05148
	1.69557	1.04678
	1.69657	1.04208
	1.69757	1.03738
	1.69857	1.03269
	1.69957	1.02799
	1.70057	1.0233
	1.70157	1.0186
	1.70257	1.01391
	1.70357	1.00922
	1.70457	1.00454
	1.70557	0.99985
	1.70657	0.99517
	1.70757	0.99049
	1.70857	0.98581
	1.70957	0.98114
	1.71057	0.97647
	1.71157	0.9718
	1.71257	0.96714
	1.71357	0.96248
	1.71457	0.95782
	1.71557	0.95317
	1.71657	0.94852
	1.71757	0.94388
	1.71857	0.93924
	1.71957	0.93461
	1.72057	0.92998
	1.72157	0.92535
	1.72257	0.92073
	1.72357	0.91612
	1.72457	0.91151
	1.72558	0.90691
	1.72658	0.90231
	1.72758	0.89772
	1.72858	0.89313
	1.72958	0.88855
	1.73058	0.88398
	1.73158	0.87941
	1.73258	0.87485
	1.73358	0.8703
	1.73458	0.86575
	1.73558	0.86121
	1.73658	0.85668
	1.73758	0.85215
	1.73858	0.84763
	1.73958	0.84312
	1.74058	0.83862
	1.74158	0.83413
	1.74258	0.82964
	1.74358	0.82516
	1.74458	0.82069
	1.74558	0.81623
	1.74658	0.81178
	1.74758	0.80733
	1.74858	0.80289
	1.74958	0.79847
	1.75058	0.79405
	1.75158	0.78964
	1.75258	0.78524
	1.75358	0.78085
	1.75458	0.77647
	1.75559	0.7721
	1.75659	0.76773
	1.75759	0.76338
	1.75859	0.75904
	1.75959	0.75471
	1.76059	0.75039
	1.76159	0.74607
	1.76259	0.74177
	1.76359	0.73748
	1.76459	0.7332
	1.76559	0.72893
	1.76659	0.72467
	1.76759	0.72042
	1.76859	0.71619
	1.76959	0.71196
	1.77059	0.70775
	1.77159	0.70354
	1.77259	0.69935
	1.77359	0.69517
	1.77459	0.691
	1.77559	0.68684
	1.77659	0.6827
	1.77759	0.67856
	1.77859	0.67444
	1.77959	0.67033
	1.78059	0.66623
	1.78159	0.66215
	1.78259	0.65807
	1.78359	0.65401
	1.78459	0.64996
	1.7856	0.64593
	1.7866	0.6419
	1.7876	0.63789
	1.7886	0.63389
	1.7896	0.62991
	1.7906	0.62594
	1.7916	0.62198
	1.7926	0.61803
	1.7936	0.6141
	1.7946	0.61018
	1.7956	0.60627
	1.7966	0.60238
	1.7976	0.5985
	1.7986	0.59463
	1.7996	0.59078
	1.8006	0.58694
	1.8016	0.58311
	1.8026	0.5793
	1.8036	0.5755
	1.8046	0.57171
	1.8056	0.56794
	1.8066	0.56419
	1.8076	0.56044
	1.8086	0.55671
	1.8096	0.553
	1.8106	0.5493
	1.8116	0.54561
	1.8126	0.54194
	1.8136	0.53828
	1.8146	0.53464
	1.81561	0.53101
	1.81661	0.52739
	1.81761	0.52379
	1.81861	0.5202
	1.81961	0.51663
	1.82061	0.51307
	1.82161	0.50953
	1.82261	0.506
	1.82361	0.50249
	1.82461	0.49899
	1.82561	0.49551
	1.82661	0.49204
	1.82761	0.48858
	1.82861	0.48514
	1.82961	0.48172
	1.83061	0.47831
	1.83161	0.47491
	1.83261	0.47153
	1.83361	0.46817
	1.83461	0.46482
	1.83561	0.46148
	1.83661	0.45816
	1.83761	0.45486
	1.83861	0.45157
	1.83961	0.44829
	1.84061	0.44503
	1.84161	0.44179
	1.84261	0.43856
	1.84361	0.43534
	1.84461	0.43215
	1.84562	0.42896
	1.84662	0.42579
	1.84762	0.42264
	1.84862	0.4195
	1.84962	0.41638
	1.85062	0.41327
	1.85162	0.41018
	1.85262	0.4071
	1.85362	0.40404
	1.85462	0.40099
	1.85562	0.39796
	1.85662	0.39494
	1.85762	0.39194
	1.85862	0.38895
	1.85962	0.38598
	1.86062	0.38303
	1.86162	0.38009
	1.86262	0.37716
	1.86362	0.37425
	1.86462	0.37136
	1.86562	0.36848
	1.86662	0.36561
	1.86762	0.36276
	1.86862	0.35993
	1.86962	0.35711
	1.87062	0.35431
	1.87162	0.35152
	1.87262	0.34875
	1.87362	0.34599
	1.87462	0.34325
	1.87563	0.34052
	1.87663	0.33781
	1.87763	0.33511
	1.87863	0.33243
	1.87963	0.32976
	1.88063	0.32711
	1.88163	0.32447
	1.88263	0.32185
	1.88363	0.31924
	1.88463	0.31665
	1.88563	0.31407
	1.88663	0.31151
	1.88763	0.30896
	1.88863	0.30643
	1.88963	0.30391
	1.89063	0.30141
	1.89163	0.29892
	1.89263	0.29644
	1.89363	0.29399
	1.89463	0.29154
	1.89563	0.28911
	1.89663	0.2867
	1.89763	0.2843
	1.89863	0.28191
	1.89963	0.27954
	1.90063	0.27719
	1.90163	0.27484
	1.90263	0.27252
	1.90363	0.2702
	1.90463	0.26791
	1.90564	0.26562
	1.90664	0.26335
	1.90764	0.2611
	1.90864	0.25886
	1.90964	0.25663
	1.91064	0.25442
	1.91164	0.25222
	1.91264	0.25004
	1.91364	0.24787
	1.91464	0.24571
	1.91564	0.24357
	1.91664	0.24144
	1.91764	0.23933
	1.91864	0.23722
	1.91964	0.23514
	1.92064	0.23307
	1.92164	0.23101
	1.92264	0.22896
	1.92364	0.22693
	1.92464	0.22491
	1.92564	0.22291
	1.92664	0.22092
	1.92764	0.21894
	1.92864	0.21698
	1.92964	0.21503
	1.93064	0.21309
	1.93164	0.21117
	1.93264	0.20926
	1.93364	0.20736
	1.93464	0.20548
	1.93565	0.20361
	1.93665	0.20175
	1.93765	0.19991
	1.93865	0.19807
	1.93965	0.19626
	1.94065	0.19445
	1.94165	0.19266
	1.94265	0.19088
	1.94365	0.18911
	1.94465	0.18736
	1.94565	0.18562
	1.94665	0.18389
	1.94765	0.18217
	1.94865	0.18047
	1.94965	0.17878
	1.95065	0.1771
	1.95165	0.17543
	1.95265	0.17378
	1.95365	0.17213
	1.95465	0.1705
	1.95565	0.16889
	1.95665	0.16728
	1.95765	0.16569
	1.95865	0.1641
	1.95965	0.16253
	1.96065	0.16098
	1.96165	0.15943
	1.96265	0.1579
	1.96365	0.15637
	1.96465	0.15486
	1.96566	0.15336
	1.96666	0.15188
	1.96766	0.1504
	1.96866	0.14894
	1.96966	0.14748
	1.97066	0.14604
	1.97166	0.14461
	1.97266	0.14319
	1.97366	0.14178
	1.97466	0.14039
	1.97566	0.139
	1.97666	0.13762
	1.97766	0.13626
	1.97866	0.13491
	1.97966	0.13357
	1.98066	0.13223
	1.98166	0.13091
	1.98266	0.1296
	1.98366	0.1283
	1.98466	0.12701
	1.98566	0.12574
	1.98666	0.12447
	1.98766	0.12321
	1.98866	0.12196
	1.98966	0.12073
	1.99066	0.1195
	1.99166	0.11828
	1.99266	0.11708
	1.99366	0.11588
	1.99466	0.11469
	1.99567	0.11352
[truncated: 1,004 more rows]

## Sheet: Appendix 1-fig.2C
	Theoretical results				Experimental data
	Group A sources		Group A sources+7AA		Group A sources		Group A sources+7AA
	Obtained from analytical results combining Eqs. S47 and S160		Obtained from analytical results analogous to Eq. S117		Reference: Nature 528, 99-104 (2015)
	Growth rate (1/h)	Jacetate (mM /OD600/h)	Growth rate (1/h)	Jacetate (mM /OD600/h)	Growth rate (1/h)	Jacetate (mM /OD600/h)	Growth rate (1/h)	Jacetate (mM /OD600/h)
	0	0	0	0	1.01	2.32	1.09	3.78
	0.01162	4.64275e-18	0.01278	5.48532e-18	1.03	2.84	1.16	4.15
	0.02323	1.8571e-17	0.02556	2.19413e-17	0.72	0.07	1.04	3.06
	0.03485	6.96413e-17	0.03833	9.05078e-17	0.93	1.44	0.8	-0.01
	0.04646	2.13567e-16	0.05111	2.85237e-16	1.14	4.07	1.26	4.18
	0.05808	6.15164e-16	0.06389	8.50225e-16
	0.0697	1.68532e-15	0.07667	2.38612e-15
	0.08131	4.43615e-15	0.08944	6.50834e-15
	0.09293	1.1384e-14	0.10222	1.71142e-14
	0.10455	2.83927e-14	0.115	4.38634e-14
	0.11616	6.92002e-14	0.12778	1.09679e-13
	0.12778	1.65187e-13	0.14056	2.68326e-13
	0.13939	3.8676e-13	0.15333	6.43461e-13
	0.15101	8.89584e-13	0.16611	1.51454e-12
	0.16263	2.01193e-12	0.17889	3.50252e-12
	0.17424	4.47828e-12	0.19167	7.96494e-12
	0.18586	9.81652e-12	0.20444	1.78227e-11
	0.19747	2.12028e-11	0.21722	3.92639e-11
	0.20909	4.51454e-11	0.23	8.51995e-11
	0.22071	9.4795e-11	0.24278	1.82168e-10
	0.23232	1.96359e-10	0.25556	3.83921e-10
	0.24394	4.01353e-10	0.26833	7.97746e-10
	0.25556	8.09695e-10	0.28111	1.63473e-09
	0.26717	1.61259e-09	0.29389	3.3043e-09
	0.27879	3.17114e-09	0.30667	6.58936e-09
	0.2904	6.15838e-09	0.31944	1.29661e-08
	0.30202	1.18124e-08	0.33222	2.51793e-08
	0.31364	2.23816e-08	0.345	4.82615e-08
	0.32525	4.18961e-08	0.35778	9.13132e-08
	0.33687	7.74876e-08	0.37056	1.70565e-07
	0.34848	1.41615e-07	0.38333	3.14565e-07
	0.3601	2.55767e-07	0.39611	5.72844e-07
	0.37172	4.56533e-07	0.40889	1.03016e-06
	0.38333	8.05428e-07	0.42167	1.82958e-06
	0.39495	1.40456e-06	0.43444	3.20927e-06
	0.40657	2.42124e-06	0.44722	5.56031e-06
	0.41818	4.12621e-06	0.46	9.51612e-06
	0.4298	6.95193e-06	0.47278	1.60885e-05
	0.44141	1.15804e-05	0.48556	2.68716e-05
	0.45303	1.90736e-05	0.49833	4.43423e-05
	0.46465	3.10637e-05	0.51111	7.22959e-05
	0.47626	5.00273e-05	0.52389	0.000116468
	0.48788	7.96743e-05	0.53667	0.000185403
	0.49949	0.000125489	0.54944	0.000291655
	0.51111	0.000195476	0.56222	0.000453407
	0.52273	0.000301163	0.575	0.000696621
	0.53434	0.000458932	0.58778	0.00106
	0.54596	0.000691763	0.60056	0.00159
	0.55758	0.00103	0.61333	0.00236
	0.56919	0.00152	0.62611	0.00345
	0.58081	0.00222	0.63889	0.00501
	0.59242	0.0032	0.65167	0.00718
	0.60404	0.00458	0.66444	0.01017
	0.61566	0.00647	0.67722	0.01425
	0.62727	0.00905	0.69	0.01975
	0.63889	0.01252	0.70278	0.02706
	0.65051	0.01715	0.71556	0.03667
	0.66212	0.02324	0.72833	0.04914
	0.67374	0.03117	0.74111	0.06514
	0.68535	0.04139	0.75389	0.08541
	0.69697	0.0544	0.76667	0.1108
	0.70859	0.07078	0.77944	0.14221
	0.7202	0.09118	0.79222	0.1806
	0.73182	0.11629	0.805	0.22697
	0.74343	0.14686	0.81778	0.2823
	0.75505	0.18368	0.83056	0.34756
	0.76667	0.22752	0.84333	0.42361
	0.77828	0.27914	0.85611	0.51119
	0.7899	0.33927	0.86889	0.61086
	0.80152	0.40853	0.88167	0.72296
	0.81313	0.48745	0.89444	0.84759
	0.82475	0.57638	0.90722	0.98453
	0.83636	0.6755	0.92	1.13326
	0.84798	0.78481	0.93278	1.29297
	0.8596	0.90405	0.94556	1.4625
	0.87121	1.03272	0.95833	1.64045
	0.88283	1.17012	0.97111	1.82515
	0.89444	1.31527	0.98389	2.01477
	0.90606	1.46704	0.99667	2.20734
	0.91768	1.62409	1.00944	2.40084
	0.92929	1.78494	1.02222	2.59326
	0.94091	1.94805	1.035	2.7827
	0.95253	2.11182	1.04778	2.96739
	0.96414	2.27469	1.06056	3.1458
	0.97576	2.43516	1.07333	3.31663
	0.98737	2.59183	1.08611	3.47887
	0.99899	2.74347	1.09889	3.63179
	1.01061	2.88906	1.11167	3.77499
	1.02222	3.02775	1.12444	3.9083
	1.03384	3.15894	1.13722	4.03185
	1.04545	3.28226	1.15	4.14596
	1.05707	3.39753	1.16278	4.25114
	1.06869	3.50478	1.17556	4.34803
	1.0803	3.60422	1.18833	4.43737
	1.09192	3.69621	1.20111	4.51995
	1.10354	3.7812	1.21389	4.59658
	1.11515	3.85975	1.22667	4.66806
	1.12677	3.93248	1.23944	4.73514
	1.13838	4	1.25222	4.79854
	1.15	4.06295	1.265	4.85888

## Sheet: Appendix 1-fig.2D
	Theoretical results			Experimental data
				0 μm CM (ι=0)			2 μm CM (ι=1.15*)			4 μm CM (ι=2.33*)			8 μm CM (ι=6.25*)
	Obtained from analytical results combining Eqs. S79 and S160			Reference: Nature 528, 99-104 (2015)
	Growth rate (1/h)	Translation efficiency 1/(ι+1)	Jacetate (mM /OD600/h)	Growth rate (1/h)	Translation efficiency 1/(ι+1)	Jacetate (mM /OD600/h)	Growth rate (1/h)	Translation efficiency 1/(ι+1)	Jacetate (mM /OD600/h)	Growth rate (1/h)	Translation efficiency 1/(ι+1)	Jacetate (mM /OD600/h)	Growth rate (1/h)	Translation efficiency 1/(ι+1)	Jacetate (mM /OD600/h)
	0	1	0	0.35	1	-0.01	0.49	0.49	-0.02	0.45	0.33	-0.17	0.27	0.15	0
	0	0.99666	0	0.55	1	-0.01	0.55	0.49	-0.01	0.5	0.33	0.7	0.31	0.15	0.76
	0	0.99331	0	0.65	1	-0.01	0.6	0.49	0.12	0.58	0.33	1.58	0.36	0.15	1.44
	0	0.98997	0	0.76	1	-0.01	0.68	0.49	1.35	0.61	0.33	2.05	0.39	0.15	1.6
	0	0.98662	0	0.87	1	0.96	0.7	0.49	1.61	0.62	0.33	2.18	0.4	0.15	1.86
	0	0.98328	0	0.92	1	2.3	0.74	0.49	2.25
	0	0.97993	0	1.03	1	2.84
	0	0.97659	0	1.16	1	4.15
	0	0.97324	0
	0	0.9699	0
	0	0.96656	0							* These values of the inhibition coefficient were fitted from experimental data
	0	0.96321	0
	0	0.95987	0
	0	0.95652	0
	0	0.95318	0
	0	0.94983	0
	0	0.94649	0
	0	0.94314	0
	0	0.9398	0
	0	0.93645	0
	0	0.93311	0
	0	0.92977	0
	0	0.92642	0
	0	0.92308	0
	0	0.91973	0
	0	0.91639	0
	0	0.91304	0
	0	0.9097	0
	0	0.90635	0
	0	0.90301	0
	0	0.89967	0
	0	0.89632	0
	0	0.89298	0
	0	0.88963	0
	0	0.88629	0
	0	0.88294	0
	0	0.8796	0
	0	0.87625	0
	0	0.87291	0
	0	0.86957	0
	0	0.86622	0
	0	0.86288	0
	0	0.85953	0
	0	0.85619	0
	0	0.85284	0
	0	0.8495	0
	0	0.84615	0
	0	0.84281	0
	0	0.83946	0
	0	0.83612	0
	0	0.83278	0
	0	0.82943	0
	0	0.82609	0
	0	0.82274	0
	0	0.8194	0
	0	0.81605	0
	0	0.81271	0
	0	0.80936	0
	0	0.80602	0
	0	0.80268	0
	0	0.79933	0
	0	0.79599	0
	0	0.79264	0
	0	0.7893	0
	0	0.78595	0
	0	0.78261	0
	0	0.77926	0
	0	0.77592	0
	0	0.77258	0
	0	0.76923	0
	0	0.76589	0
	0	0.76254	0
	0	0.7592	0
	0	0.75585	0
	0	0.75251	0
	0	0.74916	0
	0	0.74582	0
	0	0.74247	0
	0	0.73913	0
	0	0.73579	0
	0	0.73244	0
	0	0.7291	0
	0	0.72575	0
	0	0.72241	0
	0	0.71906	0
	0	0.71572	0
	0	0.71237	0
	0	0.70903	0
	0	0.70569	0
	0	0.70234	0
	0	0.699	0
	0	0.69565	0
	0	0.69231	0
	0	0.68896	0
	0	0.68562	0
	0	0.68227	0
	0	0.67893	0
	0	0.67559	0
	0	0.67224	0
	0	0.6689	0
	0	0.66555	0
	0	0.66221	0
	0	0.65886	0
	0	0.65552	0
	0	0.65217	0
	0	0.64883	0
	0	0.64548	0
	0	0.64214	0
	0	0.6388	0
	0	0.63545	0
	0	0.63211	0
	0	0.62876	0
	0	0.62542	0
	0	0.62207	0
	0	0.61873	0
	0	0.61538	0
	0	0.61204	0
	0	0.6087	0
	0	0.60535	0
	0	0.60201	0
	0	0.59866	0
	0	0.59532	0
	0	0.59197	0
	0	0.58863	0
	0	0.58528	0
	0	0.58194	0
	0	0.5786	0
	0	0.57525	0
	0	0.57191	0
	0	0.56856	0
	0	0.56522	0
	0	0.56187	0
	0	0.55853	0
	0	0.55518	0
	0	0.55184	0
	0	0.5485	0
	0	0.54515	0
	0	0.54181	0
	0	0.53846	0
	0	0.53512	0
	0	0.53177	0
	0	0.52843	0
	0	0.52508	0
	0	0.52174	0
	0	0.51839	0
	0	0.51505	0
	0	0.51171	0
	0	0.50836	0
	0	0.50502	0
	0	0.50167	0
	0	0.49833	0
	0	0.49498	0
	0	0.49164	0
	0	0.48829	0
	0	0.48495	0
	0	0.48161	0
	0	0.47826	0
	0	0.47492	0
	0	0.47157	0
	0	0.46823	0
	0	0.46488	0
	0	0.46154	0
	0	0.45819	0
	0	0.45485	0
	0	0.45151	0
	0	0.44816	0
	0	0.44482	0
	0	0.44147	0
	0	0.43813	0
	0	0.43478	0
	0	0.43144	0
	0	0.42809	0
	0	0.42475	0
	0	0.4214	0
	0	0.41806	0
	0	0.41472	0
	0	0.41137	0
	0	0.40803	0
	0	0.40468	0
	0	0.40134	0
	0	0.39799	0
	0	0.39465	0
	0	0.3913	0
	0	0.38796	0
	0	0.38462	0
	0	0.38127	0
	0	0.37793	0
	0	0.37458	0
	0	0.37124	0
	0	0.36789	0
	0	0.36455	0
	0	0.3612	0
	0	0.35786	0
	0	0.35452	0
	0	0.35117	0
	0	0.34783	0
	0	0.34448	0
	0	0.34114	0
	0	0.33779	0
	0	0.33445	0
	0	0.3311	0
	0	0.32776	0
	0	0.32441	0
	0	0.32107	0
	0	0.31773	0
	0	0.31438	0
	0	0.31104	0
	0	0.30769	0
	0	0.30435	0
	0	0.301	0
	0	0.29766	0
	0	0.29431	0
	0	0.29097	0
	0	0.28763	0
	0	0.28428	0
	0	0.28094	0
	0	0.27759	0
	0	0.27425	0
	0	0.2709	0
	0	0.26756	0
	0	0.26421	0
	0	0.26087	0
	0	0.25753	0
	0	0.25418	0
	0	0.25084	0
	0	0.24749	0
	0	0.24415	0
	0	0.2408	0
	0	0.23746	0
	0	0.23411	0
	0	0.23077	0
	0	0.22742	0
	0	0.22408	0
	0	0.22074	0
	0	0.21739	0
	0	0.21405	0
	0	0.2107	0
	0	0.20736	0
	0	0.20401	0
	0	0.20067	0
	0	0.19732	0
	0	0.19398	0
	0	0.19064	0
	0	0.18729	0
	0	0.18395	0
	0	0.1806	0
	0	0.17726	0
	0	0.17391	0
	0	0.17057	0
	0	0.16722	0
	0	0.16388	0
	0	0.16054	0
	0	0.15719	0
	0	0.15385	0
	0	0.1505	0
	0	0.14716	0
	0	0.14381	0
	0	0.14047	0
	0	0.13712	0
	0	0.13378	0
	0	0.13043	0
	0	0.12709	0
	0	0.12375	0
	0	0.1204	0
	0	0.11706	0
	0	0.11371	0
	0	0.11037	0
	0	0.10702	0
	0	0.10368	0
	0	0.10033	0
	0	0.09699	0
	0	0.09365	0
	0	0.0903	0
	0	0.08696	0
	0	0.08361	0
	0	0.08027	0
	0	0.07692	0
	0	0.07358	0
	0	0.07023	0
	0	0.06689	0
	0	0.06355	0
	0	0.0602	0
	0	0.05686	0
	0	0.05351	0
	0	0.05017	0
	0	0.04682	0
	0	0.04348	0
	0	0.04013	0
	0	0.03679	0
	0	0.03344	0
	0	0.0301	0
	0	0.02676	0
	0	0.02341	0
	0	0.02007	0
	0	0.01672	0
	0	0.01338	0
	0	0.01003	0
	0	0.00669	0
	0	0.00334	0
	0	1e-07	0
	0.00326	1	6.51108e-19
	0.00325	0.99666	6.50235e-19
	0.00325	0.99331	6.49359e-19
	0.00324	0.98997	6.48479e-19
	0.00324	0.98662	6.47596e-19
	0.00324	0.98328	6.46709e-19
	0.00323	0.97993	6.45818e-19
	0.00323	0.97659	6.44924e-19
	0.00322	0.97324	6.44026e-19
	0.00322	0.9699	6.43124e-19
	0.00321	0.96656	6.42219e-19
	0.00321	0.96321	6.4131e-19
	0.0032	0.95987	6.40397e-19
	0.0032	0.95652	6.39481e-19
	0.0032	0.95318	6.38561e-19
	0.00319	0.94983	6.37636e-19
	0.00319	0.94649	6.36709e-19
	0.00318	0.94314	6.35777e-19
	0.00318	0.9398	6.34841e-19
	0.00317	0.93645	6.33902e-19
	0.00317	0.93311	6.32958e-19
	0.00316	0.92977	6.32011e-19
	0.00316	0.92642	6.31059e-19
	0.00315	0.92308	6.30104e-19
	0.00315	0.91973	6.29144e-19
	0.00314	0.91639	6.28181e-19
	0.00314	0.91304	6.27213e-19
	0.00313	0.9097	6.26242e-19
	0.00313	0.90635	6.25266e-19
	0.00312	0.90301	6.24286e-19
	0.00312	0.89967	6.23302e-19
	0.00311	0.89632	6.22313e-19
	0.00311	0.89298	6.21321e-19
	0.0031	0.88963	6.20324e-19
	0.0031	0.88629	6.19323e-19
	0.00309	0.88294	6.18317e-19
	0.00309	0.8796	6.17307e-19
	0.00308	0.87625	6.16293e-19
	0.00308	0.87291	6.15275e-19
	0.00307	0.86957	6.14252e-19
	0.00307	0.86622	6.13224e-19
	0.00306	0.86288	6.12192e-19
	0.00306	0.85953	6.11156e-19
	0.00305	0.85619	6.10114e-19
	0.00305	0.85284	6.09069e-19
	0.00304	0.8495	6.08019e-19
	0.00304	0.84615	6.06964e-19
	0.00303	0.84281	6.05904e-19
	0.00303	0.83946	6.0484e-19
	0.00302	0.83612	6.03771e-19
	0.00302	0.83278	6.02697e-19
	0.00301	0.82943	6.01618e-19
	0.00301	0.82609	6.00535e-19
	0.003	0.82274	5.99446e-19
	0.00299	0.8194	5.98353e-19
	0.00299	0.81605	5.97255e-19
	0.00298	0.81271	5.96152e-19
	0.00298	0.80936	5.95044e-19
	0.00297	0.80602	5.93931e-19
	0.00297	0.80268	5.92813e-19
	0.00296	0.79933	5.91689e-19
	0.00296	0.79599	5.90561e-19
	0.00295	0.79264	5.89427e-19
	0.00294	0.7893	5.88288e-19
	0.00294	0.78595	5.87144e-19
	0.00293	0.78261	5.85995e-19
	0.00293	0.77926	5.8484e-19
	0.00292	0.77592	5.8368e-19
	0.00291	0.77258	5.82515e-19
	0.00291	0.76923	5.81344e-19
	0.0029	0.76589	5.80168e-19
	0.0029	0.76254	5.78986e-19
	0.00289	0.7592	5.77799e-19
	0.00289	0.75585	5.76606e-19
	0.00288	0.75251	5.75407e-19
	0.00287	0.74916	5.74203e-19
	0.00287	0.74582	5.72993e-19
	0.00286	0.74247	5.71777e-19
	0.00286	0.73913	5.70556e-19
	0.00285	0.73579	5.69329e-19
	0.00284	0.73244	5.68095e-19
	0.00284	0.7291	5.66856e-19
	0.00283	0.72575	5.65611e-19
	0.00282	0.72241	5.6436e-19
	0.00282	0.71906	5.63103e-19
	0.00281	0.71572	5.6184e-19
	0.00281	0.71237	5.60571e-19
	0.0028	0.70903	5.59296e-19
	0.00279	0.70569	5.58014e-19
	0.00279	0.70234	5.56726e-19
	0.00278	0.699	5.55432e-19
	0.00277	0.69565	5.54131e-19
	0.00277	0.69231	5.52824e-19
	0.00276	0.68896	5.51511e-19
	0.00275	0.68562	5.50191e-19
	0.00275	0.68227	5.48865e-19
	0.00274	0.67893	5.47531e-19
	0.00273	0.67559	5.46192e-19
	0.00273	0.67224	5.44845e-19
	0.00272	0.6689	5.43492e-19
	0.00271	0.66555	5.42132e-19
	0.00271	0.66221	5.40766e-19
	0.0027	0.65886	5.39392e-19
	0.00269	0.65552	5.38011e-19
	0.00269	0.65217	5.36624e-19
	0.00268	0.64883	5.35229e-19
	0.00267	0.64548	5.33827e-19
	0.00266	0.64214	5.32418e-19
	0.00266	0.6388	5.31002e-19
	0.00265	0.63545	5.29579e-19
	0.00264	0.63211	5.28148e-19
	0.00264	0.62876	5.2671e-19
	0.00263	0.62542	5.25264e-19
	0.00262	0.62207	5.23811e-19
	0.00261	0.61873	5.22351e-19
	0.00261	0.61538	5.20882e-19
	0.0026	0.61204	5.19406e-19
	0.00259	0.6087	5.17923e-19
	0.00258	0.60535	5.16431e-19
	0.00258	0.60201	5.14932e-19
	0.00257	0.59866	5.13424e-19
	0.00256	0.59532	5.11909e-19
	0.00255	0.59197	5.10386e-19
	0.00255	0.58863	5.08854e-19
	0.00254	0.58528	5.07315e-19
	0.00253	0.58194	5.05767e-19
	0.00252	0.5786	5.04211e-19
	0.00252	0.57525	5.02646e-19
	0.00251	0.57191	5.01073e-19
	0.0025	0.56856	4.99492e-19
	0.00249	0.56522	4.97901e-19
	0.00248	0.56187	4.96303e-19
	0.00248	0.55853	4.94695e-19
	0.00247	0.55518	4.93079e-19
	0.00246	0.55184	4.91454e-19
	0.00245	0.5485	4.89819e-19
	0.00244	0.54515	4.88176e-19
	0.00243	0.54181	4.86524e-19
	0.00243	0.53846	4.84863e-19
	0.00242	0.53512	4.83192e-19
	0.00241	0.53177	4.81512e-19
	0.0024	0.52843	4.79823e-19
	0.00239	0.52508	4.78124e-19
	0.00238	0.52174	4.76415e-19
	0.00238	0.51839	4.74697e-19
	0.00237	0.51505	4.72969e-19
	0.00236	0.51171	4.71232e-19
	0.00235	0.50836	4.69484e-19
	0.00234	0.50502	4.67727e-19
	0.00233	0.50167	4.65959e-19
	0.00232	0.49833	4.64182e-19
	0.00231	0.49498	4.62394e-19
	0.0023	0.49164	4.60595e-19
	0.0023	0.48829	4.58787e-19
	0.00229	0.48495	4.56968e-19
	0.00228	0.48161	4.55138e-19
	0.00227	0.47826	4.53297e-19
	0.00226	0.47492	4.51446e-19
	0.00225	0.47157	4.49584e-19
	0.00224	0.46823	4.47711e-19
	0.00223	0.46488	4.45827e-19
	0.00222	0.46154	4.43932e-19
	0.00221	0.45819	4.42025e-19
	0.0022	0.45485	4.40107e-19
	0.00219	0.45151	4.38178e-19
	0.00218	0.44816	4.36237e-19
	0.00217	0.44482	4.34284e-19
	0.00216	0.44147	4.32319e-19
	0.00215	0.43813	4.30343e-19
	0.00214	0.43478	4.28355e-19
	0.00213	0.43144	4.26354e-19
	0.00212	0.42809	4.24341e-19
	0.00211	0.42475	4.22316e-19
	0.0021	0.4214	4.20279e-19
	0.00209	0.41806	4.18229e-19
	0.00208	0.41472	4.16166e-19
	0.00207	0.41137	4.1409e-19
	0.00206	0.40803	4.12002e-19
	0.00205	0.40468	4.09901e-19
	0.00204	0.40134	4.07786e-19
	0.00203	0.39799	4.05658e-19
	0.00202	0.39465	4.03517e-19
	0.00201	0.3913	4.01362e-19
	0.002	0.38796	3.99193e-19
	0.00199	0.38462	3.97011e-19
	0.00198	0.38127	3.94814e-19
	0.00196	0.37793	3.92604e-19
	0.00195	0.37458	3.9038e-19
	0.00194	0.37124	3.88141e-19
	0.00193	0.36789	3.85887e-19
	0.00192	0.36455	3.83619e-19
	0.00191	0.3612	3.81337e-19
	0.0019	0.35786	3.79039e-19
	0.00189	0.35452	3.76726e-19
	0.00187	0.35117	3.74398e-19
	0.00186	0.34783	3.72055e-19
	0.00185	0.34448	3.69696e-19
	0.00184	0.34114	3.67322e-19
	0.00183	0.33779	3.64932e-19
	0.00181	0.33445	3.62526e-19
	0.0018	0.3311	3.60103e-19
	0.00179	0.32776	3.57665e-19
	0.00178	0.32441	3.5521e-19
	0.00177	0.32107	3.52738e-19
	0.00175	0.31773	3.5025e-19
	0.00174	0.31438	3.47744e-19
	0.00173	0.31104	3.45222e-19
	0.00171	0.30769	3.42682e-19
	0.0017	0.30435	3.40124e-19
	0.00169	0.301	3.37549e-19
	0.00168	0.29766	3.34956e-19
	0.00166	0.29431	3.32345e-19
	0.00165	0.29097	3.29716e-19
	0.00164	0.28763	3.27069e-19
	0.00162	0.28428	3.24402e-19
	0.00161	0.28094	3.21717e-19
	0.0016	0.27759	3.19013e-19
	0.00158	0.27425	3.1629e-19
	0.00157	0.2709	3.13547e-19
	0.00156	0.26756	3.10785e-19
	0.00154	0.26421	3.08003e-19
	0.00153	0.26087	3.052e-19
	0.00151	0.25753	3.02378e-19
	0.0015	0.25418	2.99535e-19
	0.00148	0.25084	2.96671e-19
	0.00147	0.24749	2.93786e-19
	0.00146	0.24415	2.9088e-19
	0.00144	0.2408	2.87953e-19
	0.00143	0.23746	2.85004e-19
	0.00141	0.23411	2.82033e-19
	0.0014	0.23077	2.7904e-19
	0.00138	0.22742	2.76024e-19
	0.00137	0.22408	2.72986e-19
	0.00135	0.22074	2.69925e-19
	0.00134	0.21739	2.66841e-19
	0.00132	0.21405	2.63734e-19
	0.0013	0.2107	2.60602e-19
	0.00129	0.20736	2.57447e-19
	0.00127	0.20401	2.54268e-19
	0.00126	0.20067	2.51064e-19
	0.00124	0.19732	2.47835e-19
	0.00122	0.19398	2.44581e-19
	0.00121	0.19064	2.41302e-19
	0.00119	0.18729	2.37997e-19
	0.00117	0.18395	2.34666e-19
	0.00116	0.1806	2.31309e-19
	0.00114	0.17726	2.27925e-19
	0.00112	0.17391	2.24514e-19
	0.00111	0.17057	2.21076e-19
	0.00109	0.16722	2.1761e-19
	0.00107	0.16388	2.14117e-19
	0.00105	0.16054	2.10595e-19
	0.00104	0.15719	2.07045e-19
	0.00102	0.15385	2.03466e-19
	0.001	0.1505	1.99857e-19
	0.000981879	0.14716	1.96219e-19
	0.000963523	0.14381	1.9255e-19
	0.000945014	0.14047	1.88852e-19
	0.000926352	0.13712	1.85122e-19
	0.000907534	0.13378	1.81362e-19
	0.000888558	0.13043	1.7757e-19
	0.000869423	0.12709	1.73746e-19
	0.000850125	0.12375	1.69889e-19
	0.000830663	0.1204	1.66e-19
	0.000811035	0.11706	1.62077e-19
	0.000791239	0.11371	1.58121e-19
	0.000771273	0.11037	1.54131e-19
	0.000751134	0.10702	1.50107e-19
	0.00073082	0.10368	1.46047e-19
	0.000710329	0.10033	1.41952e-19
	0.000689658	0.09699	1.37821e-19
	0.000668806	0.09365	1.33654e-19
	0.000647769	0.0903	1.2945e-19
	0.000626546	0.08696	1.25209e-19
	0.000605133	0.08361	1.2093e-19
	0.000583529	0.08027	1.16613e-19
	0.00056173	0.07692	1.12256e-19
	0.000539735	0.07358	1.07861e-19
	0.000517539	0.07023	1.03425e-19
	0.000495142	0.06689	9.89492e-20
	0.000472539	0.06355	9.44323e-20
	0.000449728	0.0602	8.98738e-20
	0.000426707	0.05686	8.52731e-20
	0.000403471	0.05351	8.06298e-20
	0.000380019	0.05017	7.59431e-20
	0.000356347	0.04682	7.12124e-20
	0.000332452	0.04348	6.64373e-20
	0.000308331	0.04013	6.16169e-20
	0.00028398	0.03679	5.67507e-20
	0.000259397	0.03344	5.1838e-20
	0.000234578	0.0301	4.68781e-20
	0.00020952	0.02676	4.18704e-20
	0.000184218	0.02341	3.68142e-20
	0.00015867	0.02007	3.17087e-20
	0.000132872	0.01672	2.65533e-20
	0.000106821	0.01338	2.13471e-20
	8.05118e-05	0.01003	1.60895e-20
	5.39414e-05	0.00669	1.07797e-20
	2.71057e-05	0.00334	5.41681e-21
	8.14502e-10	1e-07	1.6277e-25
	0.00652	1	1.30222e-18
	0.00651	0.99666	1.30047e-18
	0.0065	0.99331	1.29872e-18
	0.00649	0.98997	1.29696e-18
	0.00648	0.98662	1.29519e-18
	0.00647	0.98328	1.29342e-18
	0.00646	0.97993	1.29164e-18
	0.00645	0.97659	1.28985e-18
	0.00645	0.97324	1.28805e-18
	0.00644	0.9699	1.28625e-18
	0.00643	0.96656	1.28444e-18
	0.00642	0.96321	1.28262e-18
	0.00641	0.95987	1.28079e-18
	0.0064	0.95652	1.27896e-18
	0.00639	0.95318	1.27712e-18
	0.00638	0.94983	1.27527e-18
	0.00637	0.94649	1.27342e-18
	0.00636	0.94314	1.27155e-18
	0.00635	0.9398	1.26968e-18
	0.00634	0.93645	1.2678e-18
	0.00633	0.93311	1.26592e-18
	0.00633	0.92977	1.26402e-18
	0.00632	0.92642	1.26212e-18
	0.00631	0.92308	1.26021e-18
	0.0063	0.91973	1.25829e-18
	0.00629	0.91639	1.25636e-18
	0.00628	0.91304	1.25443e-18
	0.00627	0.9097	1.25248e-18
	0.00626	0.90635	1.25053e-18
	0.00625	0.90301	1.24857e-18
	0.00624	0.89967	1.2466e-18
	0.00623	0.89632	1.24463e-18
	0.00622	0.89298	1.24264e-18
	0.00621	0.88963	1.24065e-18
	0.0062	0.88629	1.23865e-18
	0.00619	0.88294	1.23663e-18
	0.00618	0.8796	1.23461e-18
	0.00617	0.87625	1.23259e-18
	0.00616	0.87291	1.23055e-18
	0.00615	0.86957	1.2285e-18
	0.00614	0.86622	1.22645e-18
	0.00613	0.86288	1.22438e-18
	0.00612	0.85953	1.22231e-18
	0.00611	0.85619	1.22023e-18
	0.0061	0.85284	1.21814e-18
	0.00609	0.8495	1.21604e-18
	0.00607	0.84615	1.21393e-18
	0.00606	0.84281	1.21181e-18
	0.00605	0.83946	1.20968e-18
	0.00604	0.83612	1.20754e-18
	0.00603	0.83278	1.20539e-18
	0.00602	0.82943	1.20324e-18
	0.00601	0.82609	1.20107e-18
	0.006	0.82274	1.19889e-18
	0.00599	0.8194	1.19671e-18
	0.00598	0.81605	1.19451e-18
	0.00597	0.81271	1.1923e-18
	0.00596	0.80936	1.19009e-18
	0.00594	0.80602	1.18786e-18
	0.00593	0.80268	1.18563e-18
	0.00592	0.79933	1.18338e-18
	0.00591	0.79599	1.18112e-18
	0.0059	0.79264	1.17885e-18
	0.00589	0.7893	1.17658e-18
	0.00588	0.78595	1.17429e-18
	0.00586	0.78261	1.17199e-18
	0.00585	0.77926	1.16968e-18
	0.00584	0.77592	1.16736e-18
	0.00583	0.77258	1.16503e-18
	0.00582	0.76923	1.16269e-18
	0.00581	0.76589	1.16034e-18
	0.00579	0.76254	1.15797e-18
	0.00578	0.7592	1.1556e-18
	0.00577	0.75585	1.15321e-18
	0.00576	0.75251	1.15081e-18
	0.00575	0.74916	1.14841e-18
	0.00573	0.74582	1.14599e-18
	0.00572	0.74247	1.14355e-18
	0.00571	0.73913	1.14111e-18
	0.0057	0.73579	1.13866e-18
	0.00569	0.73244	1.13619e-18
	0.00567	0.7291	1.13371e-18
	0.00566	0.72575	1.13122e-18
	0.00565	0.72241	1.12872e-18
	0.00564	0.71906	1.12621e-18
	0.00562	0.71572	1.12368e-18
	0.00561	0.71237	1.12114e-18
	0.0056	0.70903	1.11859e-18
	0.00558	0.70569	1.11603e-18
	0.00557	0.70234	1.11345e-18
	0.00556	0.699	1.11086e-18
	0.00555	0.69565	1.10826e-18
	0.00553	0.69231	1.10565e-18
	0.00552	0.68896	1.10302e-18
	0.00551	0.68562	1.10038e-18
	0.00549	0.68227	1.09773e-18
	0.00548	0.67893	1.09506e-18
	0.00547	0.67559	1.09238e-18
	0.00545	0.67224	1.08969e-18
	0.00544	0.6689	1.08698e-18
	0.00543	0.66555	1.08426e-18
	0.00541	0.66221	1.08153e-18
	0.0054	0.65886	1.07878e-18
	0.00538	0.65552	1.07602e-18
	0.00537	0.65217	1.07325e-18
	0.00536	0.64883	1.07046e-18
	0.00534	0.64548	1.06765e-18
	0.00533	0.64214	1.06484e-18
	0.00531	0.6388	1.062e-18
	0.0053	0.63545	1.05916e-18
	0.00529	0.63211	1.0563e-18
	0.00527	0.62876	1.05342e-18
	0.00526	0.62542	1.05053e-18
	0.00524	0.62207	1.04762e-18
	0.00523	0.61873	1.0447e-18
	0.00521	0.61538	1.04176e-18
	0.0052	0.61204	1.03881e-18
	0.00518	0.6087	1.03585e-18
	0.00517	0.60535	1.03286e-18
	0.00515	0.60201	1.02986e-18
	0.00514	0.59866	1.02685e-18
	0.00512	0.59532	1.02382e-18
	0.00511	0.59197	1.02077e-18
	0.00509	0.58863	1.01771e-18
	0.00508	0.58528	1.01463e-18
	0.00506	0.58194	1.01153e-18
	0.00505	0.5786	1.00842e-18
	0.00503	0.57525	1.00529e-18
	0.00501	0.57191	1.00215e-18
	0.005	0.56856	9.98983e-19
	0.00498	0.56522	9.95803e-19
	0.00497	0.56187	9.92605e-19
	0.00495	0.55853	9.8939e-19
	0.00493	0.55518	9.86158e-19
	0.00492	0.55184	9.82907e-19
	0.0049	0.5485	9.79639e-19
	0.00489	0.54515	9.76353e-19
	0.00487	0.54181	9.73048e-19
	0.00485	0.53846	9.69725e-19
	0.00484	0.53512	9.66384e-19
	0.00482	0.53177	9.63024e-19
	0.0048	0.52843	9.59645e-19
	0.00479	0.52508	9.56248e-19
	0.00477	0.52174	9.52831e-19
	0.00475	0.51839	9.49395e-19
	0.00473	0.51505	9.45939e-19
	0.00472	0.51171	9.42464e-19
	0.0047	0.50836	9.38969e-19
	0.00468	0.50502	9.35454e-19
	0.00466	0.50167	9.31919e-19
	0.00465	0.49833	9.28363e-19
	0.00463	0.49498	9.24787e-19
	0.00461	0.49164	9.21191e-19
	0.00459	0.48829	9.17574e-19
	0.00457	0.48495	9.13935e-19
	0.00456	0.48161	9.10276e-19
	0.00454	0.47826	9.06595e-19
	0.00452	0.47492	9.02892e-19
	0.0045	0.47157	8.99168e-19
	0.00448	0.46823	8.95422e-19
	0.00446	0.46488	8.91654e-19
	0.00444	0.46154	8.87863e-19
	0.00442	0.45819	8.8405e-19
	0.0044	0.45485	8.80214e-19
	0.00439	0.45151	8.76355e-19
	0.00437	0.44816	8.72473e-19
	0.00435	0.44482	8.68568e-19
	0.00433	0.44147	8.64639e-19
	0.00431	0.43813	8.60686e-19
	0.00429	0.43478	8.56709e-19
	0.00427	0.43144	8.52708e-19
	0.00425	0.42809	8.48683e-19
	0.00423	0.42475	8.44633e-19
	0.00421	0.4214	8.40558e-19
	0.00419	0.41806	8.36458e-19
	0.00416	0.41472	8.32332e-19
	0.00414	0.41137	8.28181e-19
	0.00412	0.40803	8.24004e-19
	0.0041	0.40468	8.19801e-19
	0.00408	0.40134	8.15572e-19
	0.00406	0.39799	8.11316e-19
	0.00404	0.39465	8.07033e-19
	0.00402	0.3913	8.02723e-19
	0.004	0.38796	7.98386e-19
	0.00397	0.38462	7.94022e-19
	0.00395	0.38127	7.89629e-19
	0.00393	0.37793	7.85208e-19
	0.00391	0.37458	7.80759e-19
	0.00388	0.37124	7.76281e-19
	0.00386	0.36789	7.71775e-19
	0.00384	0.36455	7.67239e-19
	0.00382	0.3612	7.62673e-19
	0.00379	0.35786	7.58078e-19
	0.00377	0.35452	7.53453e-19
	0.00375	0.35117	7.48797e-19
	0.00372	0.34783	7.4411e-19
	0.0037	0.34448	7.39393e-19
	0.00368	0.34114	7.34644e-19
	0.00365	0.33779	7.29864e-19
	0.00363	0.33445	7.25051e-19
	0.0036	0.3311	7.20207e-19
	0.00358	0.32776	7.1533e-19
	0.00355	0.32441	7.1042e-19
	0.00353	0.32107	7.05476e-19
	0.00351	0.31773	7.00499e-19
	0.00348	0.31438	6.95488e-19
	0.00345	0.31104	6.90443e-19
	0.00343	0.30769	6.85364e-19
	0.0034	0.30435	6.80249e-19
	0.00338	0.301	6.75099e-19
	0.00335	0.29766	6.69913e-19
	0.00333	0.29431	6.64691e-19
	0.0033	0.29097	6.59433e-19
	0.00327	0.28763	6.54137e-19
	0.00325	0.28428	6.48805e-19
	0.00322	0.28094	6.43435e-19
	0.00319	0.27759	6.38026e-19
	0.00317	0.27425	6.3258e-19
	0.00314	0.2709	6.27094e-19
	0.00311	0.26756	6.2157e-19
	0.00308	0.26421	6.16005e-19
	0.00305	0.26087	6.104e-19
	0.00303	0.25753	6.04755e-19
	0.003	0.25418	5.99069e-19
	0.00297	0.25084	5.93342e-19
	0.00294	0.24749	5.87572e-19
	0.00291	0.24415	5.8176e-19
	0.00288	0.2408	5.75905e-19
	0.00285	0.23746	5.70007e-19
	0.00282	0.23411	5.64066e-19
	0.00279	0.23077	5.5808e-19
	0.00276	0.22742	5.52049e-19
	0.00273	0.22408	5.45972e-19
	0.0027	0.22074	5.39851e-19
	0.00267	0.21739	5.33682e-19
	0.00264	0.21405	5.27467e-19
	0.00261	0.2107	5.21205e-19
	0.00258	0.20736	5.14894e-19
	0.00254	0.20401	5.08535e-19
	0.00251	0.20067	5.02127e-19
	0.00248	0.19732	4.9567e-19
	0.00245	0.19398	4.89162e-19
	0.00241	0.19064	4.82603e-19
	0.00238	0.18729	4.75994e-19
	0.00235	0.18395	4.69332e-19
	0.00231	0.1806	4.62617e-19
	0.00228	0.17726	4.5585e-19
	0.00225	0.17391	4.49028e-19
	0.00221	0.17057	4.42152e-19
	0.00218	0.16722	4.35221e-19
	0.00214	0.16388	4.28234e-19
	0.00211	0.16054	4.2119e-19
	0.00207	0.15719	4.1409e-19
	0.00204	0.15385	4.06931e-19
	0.002	0.1505	3.99714e-19
	0.00196	0.14716	3.92437e-19
	0.00193	0.14381	3.85101e-19
	0.00189	0.14047	3.77704e-19
	0.00185	0.13712	3.70245e-19
	0.00182	0.13378	3.62724e-19
	0.00178	0.13043	3.55139e-19
	0.00174	0.12709	3.47491e-19
	0.0017	0.12375	3.39778e-19
	0.00166	0.1204	3.32e-19
	0.00162	0.11706	3.24155e-19
	0.00158	0.11371	3.16243e-19
	0.00154	0.11037	3.08263e-19
	0.0015	0.10702	3.00213e-19
	0.00146	0.10368	2.92094e-19
	0.00142	0.10033	2.83904e-19
	0.00138	0.09699	2.75643e-19
	0.00134	0.09365	2.67308e-19
	0.0013	0.0903	2.58901e-19
	0.00125	0.08696	2.50418e-19
	0.00121	0.08361	2.4186e-19
	0.00117	0.08027	2.33225e-19
	0.00112	0.07692	2.24513e-19
	0.00108	0.07358	2.15721e-19
	0.00104	0.07023	2.0685e-19
	0.000990284	0.06689	1.97898e-19
	0.000945078	0.06355	1.88865e-19
	0.000899457	0.0602	1.79748e-19
	0.000853414	0.05686	1.70546e-19
	0.000806943	0.05351	1.6126e-19
	0.000760038	0.05017	1.51886e-19
	0.000712694	0.04682	1.42425e-19
	0.000664904	0.04348	1.32875e-19
	0.000616662	0.04013	1.23234e-19
	0.000567961	0.03679	1.13501e-19
	0.000518794	0.03344	1.03676e-19
	0.000469156	0.0301	9.37562e-20
	0.000419039	0.02676	8.37408e-20
	0.000368436	0.02341	7.36284e-20
	0.000317341	0.02007	6.34174e-20
	0.000265745	0.01672	5.31065e-20
	0.000213642	0.01338	4.26942e-20
	0.000161024	0.01003	3.2179e-20
	0.000107883	0.00669	2.15593e-20
	5.42114e-05	0.00334	1.08336e-20
	1.629e-09	1e-07	3.2554e-25
	0.00977	1	1.95332e-18
	0.00976	0.99666	1.95071e-18
	0.00975	0.99331	1.94808e-18
	0.00973	0.98997	1.94544e-18
	0.00972	0.98662	1.94279e-18
	0.00971	0.98328	1.94013e-18
	0.0097	0.97993	1.93745e-18
	0.00968	0.97659	1.93477e-18
	0.00967	0.97324	1.93208e-18
	0.00965	0.9699	1.92937e-18
	0.00964	0.96656	1.92666e-18
	0.00963	0.96321	1.92393e-18
	0.00961	0.95987	1.92119e-18
	0.0096	0.95652	1.91844e-18
	0.00959	0.95318	1.91568e-18
	0.00957	0.94983	1.91291e-18
	0.00956	0.94649	1.91013e-18
	0.00954	0.94314	1.90733e-18
	0.00953	0.9398	1.90452e-18
	0.00952	0.93645	1.9017e-18
	0.0095	0.93311	1.89887e-18
	0.00949	0.92977	1.89603e-18
	0.00947	0.92642	1.89318e-18
	0.00946	0.92308	1.89031e-18
	0.00944	0.91973	1.88743e-18
	0.00943	0.91639	1.88454e-18
	0.00942	0.91304	1.88164e-18
	0.0094	0.9097	1.87873e-18
	0.00939	0.90635	1.8758e-18
	0.00937	0.90301	1.87286e-18
	0.00936	0.89967	1.86991e-18
	0.00934	0.89632	1.86694e-18
	0.00933	0.89298	1.86396e-18
	0.00931	0.88963	1.86097e-18
	0.0093	0.88629	1.85797e-18
	0.00928	0.88294	1.85495e-18
	0.00927	0.8796	1.85192e-18
	0.00925	0.87625	1.84888e-18
	0.00924	0.87291	1.84582e-18
	0.00922	0.86957	1.84275e-18
	0.00921	0.86622	1.83967e-18
	0.00919	0.86288	1.83658e-18
	0.00917	0.85953	1.83347e-18
	0.00916	0.85619	1.83034e-18
	0.00914	0.85284	1.82721e-18
	0.00913	0.8495	1.82406e-18
	0.00911	0.84615	1.82089e-18
	0.0091	0.84281	1.81771e-18
	0.00908	0.83946	1.81452e-18
	0.00906	0.83612	1.81131e-18
	0.00905	0.83278	1.80809e-18
	0.00903	0.82943	1.80485e-18
	0.00902	0.82609	1.8016e-18
	0.009	0.82274	1.79834e-18
	0.00898	0.8194	1.79506e-18
	0.00897	0.81605	1.79177e-18
	0.00895	0.81271	1.78846e-18
	0.00893	0.80936	1.78513e-18
	0.00892	0.80602	1.78179e-18
	0.0089	0.80268	1.77844e-18
	0.00888	0.79933	1.77507e-18
	0.00887	0.79599	1.77168e-18
	0.00885	0.79264	1.76828e-18
	0.00883	0.7893	1.76487e-18
	0.00881	0.78595	1.76143e-18
	0.0088	0.78261	1.75798e-18
	0.00878	0.77926	1.75452e-18
	0.00876	0.77592	1.75104e-18
	0.00874	0.77258	1.74754e-18
	0.00873	0.76923	1.74403e-18
	0.00871	0.76589	1.7405e-18
	0.00869	0.76254	1.73696e-18
	0.00867	0.7592	1.7334e-18
	0.00866	0.75585	1.72982e-18
	0.00864	0.75251	1.72622e-18
	0.00862	0.74916	1.72261e-18
	0.0086	0.74582	1.71898e-18
	0.00858	0.74247	1.71533e-18
	0.00857	0.73913	1.71167e-18
	0.00855	0.73579	1.70799e-18
	0.00853	0.73244	1.70429e-18
	0.00851	0.7291	1.70057e-18
	0.00849	0.72575	1.69683e-18
	0.00847	0.72241	1.69308e-18
	0.00845	0.71906	1.68931e-18
	0.00843	0.71572	1.68552e-18
	0.00842	0.71237	1.68171e-18
	0.0084	0.70903	1.67789e-18
	0.00838	0.70569	1.67404e-18
	0.00836	0.70234	1.67018e-18
	0.00834	0.699	1.6663e-18
	0.00832	0.69565	1.66239e-18
	0.0083	0.69231	1.65847e-18
	0.00828	0.68896	1.65453e-18
	0.00826	0.68562	1.65057e-18
	0.00824	0.68227	1.64659e-18
	0.00822	0.67893	1.64259e-18
	0.0082	0.67559	1.63858e-18
	0.00818	0.67224	1.63454e-18
	0.00816	0.6689	1.63048e-18
	0.00814	0.66555	1.6264e-18
	0.00812	0.66221	1.6223e-18
	0.0081	0.65886	1.61818e-18
	0.00808	0.65552	1.61403e-18
	0.00806	0.65217	1.60987e-18
	0.00803	0.64883	1.60569e-18
	0.00801	0.64548	1.60148e-18
	0.00799	0.64214	1.59726e-18
	0.00797	0.6388	1.59301e-18
	0.00795	0.63545	1.58874e-18
	0.00793	0.63211	1.58444e-18
	0.00791	0.62876	1.58013e-18
	0.00789	0.62542	1.57579e-18
	0.00786	0.62207	1.57143e-18
	0.00784	0.61873	1.56705e-18
	0.00782	0.61538	1.56265e-18
	0.0078	0.61204	1.55822e-18
	0.00778	0.6087	1.55377e-18
	0.00775	0.60535	1.54929e-18
	0.00773	0.60201	1.5448e-18
	0.00771	0.59866	1.54027e-18
	0.00768	0.59532	1.53573e-18
	0.00766	0.59197	1.53116e-18
	0.00764	0.58863	1.52656e-18
	0.00762	0.58528	1.52194e-18
	0.00759	0.58194	1.5173e-18
	0.00757	0.5786	1.51263e-18
	0.00755	0.57525	1.50794e-18
	0.00752	0.57191	1.50322e-18
	0.0075	0.56856	1.49847e-18
	0.00747	0.56522	1.4937e-18
	0.00745	0.56187	1.48891e-18
	0.00743	0.55853	1.48409e-18
	0.0074	0.55518	1.47924e-18
	0.00738	0.55184	1.47436e-18
	0.00735	0.5485	1.46946e-18
	0.00733	0.54515	1.46453e-18
	0.0073	0.54181	1.45957e-18
	0.00728	0.53846	1.45459e-18
	0.00725	0.53512	1.44958e-18
	0.00723	0.53177	1.44454e-18
	0.0072	0.52843	1.43947e-18
	0.00718	0.52508	1.43437e-18
	0.00715	0.52174	1.42925e-18
	0.00713	0.51839	1.42409e-18
	0.0071	0.51505	1.41891e-18
	0.00707	0.51171	1.4137e-18
	0.00705	0.50836	1.40845e-18
	0.00702	0.50502	1.40318e-18
	0.00699	0.50167	1.39788e-18
	0.00697	0.49833	1.39254e-18
	0.00694	0.49498	1.38718e-18
	0.00691	0.49164	1.38179e-18
	0.00689	0.48829	1.37636e-18
	0.00686	0.48495	1.3709e-18
	0.00683	0.48161	1.36541e-18
	0.0068	0.47826	1.35989e-18
	0.00678	0.47492	1.35434e-18
	0.00675	0.47157	1.34875e-18
	0.00672	0.46823	1.34313e-18
	0.00669	0.46488	1.33748e-18
	0.00666	0.46154	1.33179e-18
	0.00664	0.45819	1.32607e-18
	0.00661	0.45485	1.32032e-18
	0.00658	0.45151	1.31453e-18
	0.00655	0.44816	1.30871e-18
	0.00652	0.44482	1.30285e-18
	0.00649	0.44147	1.29696e-18
	0.00646	0.43813	1.29103e-18
	0.00643	0.43478	1.28506e-18
	0.0064	0.43144	1.27906e-18
	0.00637	0.42809	1.27302e-18
	0.00634	0.42475	1.26695e-18
	0.00631	0.4214	1.26084e-18
	0.00628	0.41806	1.25469e-18
	0.00625	0.41472	1.2485e-18
	0.00622	0.41137	1.24227e-18
	0.00618	0.40803	1.23601e-18
	0.00615	0.40468	1.2297e-18
	0.00612	0.40134	1.22336e-18
	0.00609	0.39799	1.21697e-18
	0.00606	0.39465	1.21055e-18
	0.00603	0.3913	1.20409e-18
	0.00599	0.38796	1.19758e-18
	0.00596	0.38462	1.19103e-18
	0.00593	0.38127	1.18444e-18
	0.00589	0.37793	1.17781e-18
	0.00586	0.37458	1.17114e-18
	0.00583	0.37124	1.16442e-18
	0.00579	0.36789	1.15766e-18
	0.00576	0.36455	1.15086e-18
	0.00572	0.3612	1.14401e-18
	0.00569	0.35786	1.13712e-18
	0.00566	0.35452	1.13018e-18
	0.00562	0.35117	1.1232e-18
	0.00559	0.34783	1.11617e-18
	0.00555	0.34448	1.10909e-18
	0.00551	0.34114	1.10197e-18
	0.00548	0.33779	1.0948e-18
	0.00544	0.33445	1.08758e-18
	0.00541	0.3311	1.08031e-18
	0.00537	0.32776	1.07299e-18
	0.00533	0.32441	1.06563e-18
	0.0053	0.32107	1.05821e-18
	0.00526	0.31773	1.05075e-18
	0.00522	0.31438	1.04323e-18
	0.00518	0.31104	1.03567e-18
	0.00514	0.30769	1.02805e-18
	0.00511	0.30435	1.02037e-18
	0.00507	0.301	1.01265e-18
	0.00503	0.29766	1.00487e-18
	0.00499	0.29431	9.97036e-19
	0.00495	0.29097	9.89149e-19
	0.00491	0.28763	9.81206e-19
	0.00487	0.28428	9.73207e-19
	0.00483	0.28094	9.65152e-19
	0.00479	0.27759	9.5704e-19
	0.00475	0.27425	9.4887e-19
	0.00471	0.2709	9.40641e-19
	0.00467	0.26756	9.32354e-19
	0.00462	0.26421	9.24008e-19
	0.00458	0.26087	9.15601e-19
	0.00454	0.25753	9.07133e-19
	0.0045	0.25418	8.98604e-19
	0.00445	0.25084	8.90012e-19
	0.00441	0.24749	8.81358e-19
	0.00437	0.24415	8.7264e-19
	0.00432	0.2408	8.63858e-19
	0.00428	0.23746	8.55011e-19
	0.00423	0.23411	8.46098e-19
	0.00419	0.23077	8.37119e-19
	0.00414	0.22742	8.28073e-19
	0.0041	0.22408	8.18959e-19
	0.00405	0.22074	8.09776e-19
	0.00401	0.21739	8.00523e-19
	0.00396	0.21405	7.91201e-19
	0.00391	0.2107	7.81807e-19
	0.00386	0.20736	7.72341e-19
	0.00382	0.20401	7.62803e-19
	0.00377	0.20067	7.53191e-19
	0.00372	0.19732	7.43505e-19
	0.00367	0.19398	7.33743e-19
	0.00362	0.19064	7.23905e-19
	0.00357	0.18729	7.1399e-19
	0.00352	0.18395	7.03997e-19
	0.00347	0.1806	6.93926e-19
	0.00342	0.17726	6.83774e-19
	0.00337	0.17391	6.73542e-19
	0.00332	0.17057	6.63228e-19
	0.00327	0.16722	6.52831e-19
	0.00321	0.16388	6.42351e-19
	0.00316	0.16054	6.31785e-19
	0.00311	0.15719	6.21134e-19
	0.00305	0.15385	6.10397e-19
	0.003	0.1505	5.99571e-19
	0.00295	0.14716	5.88656e-19
	0.00289	0.14381	5.77651e-19
	0.00284	0.14047	5.66556e-19
	0.00278	0.13712	5.55367e-19
	0.00272	0.13378	5.44085e-19
	0.00267	0.13043	5.32709e-19
	0.00261	0.12709	5.21237e-19
	0.00255	0.12375	5.09667e-19
	0.00249	0.1204	4.98e-19
	0.00243	0.11706	4.86232e-19
	0.00237	0.11371	4.74364e-19
	0.00231	0.11037	4.62394e-19
	0.00225	0.10702	4.5032e-19
	0.00219	0.10368	4.38141e-19
	0.00213	0.10033	4.25857e-19
	0.00207	0.09699	4.13464e-19
	0.00201	0.09365	4.00963e-19
	0.00194	0.0903	3.88351e-19
	0.00188	0.08696	3.75627e-19
	0.00182	0.08361	3.6279e-19
	0.00175	0.08027	3.49838e-19
	0.00169	0.07692	3.36769e-19
	0.00162	0.07358	3.23582e-19
	0.00155	0.07023	3.10275e-19
	0.00149	0.06689	2.96848e-19
	0.00142	0.06355	2.83297e-19
	0.00135	0.0602	2.69621e-19
	0.00128	0.05686	2.55819e-19
	0.00121	0.05351	2.41889e-19
	0.00114	0.05017	2.27829e-19
	0.00107	0.04682	2.13637e-19
	0.000997356	0.04348	1.99312e-19
	0.000924992	0.04013	1.84851e-19
	0.000851941	0.03679	1.70252e-19
	0.000778192	0.03344	1.55514e-19
	0.000703734	0.0301	1.40634e-19
	0.000628559	0.02676	1.25611e-19
	0.000552654	0.02341	1.10443e-19
	0.000476011	0.02007	9.51261e-20
	0.000398617	0.01672	7.96598e-20
	0.000320463	0.01338	6.40413e-20
	0.000241535	0.01003	4.82685e-20
	0.000161824	0.00669	3.2339e-20
	8.13171e-05	0.00334	1.62504e-20
	2.44351e-09	1e-07	4.88311e-25
	0.01303	1	5.20887e-18
	0.01302	0.99666	5.20188e-18
	0.013	0.99331	5.19487e-18
	0.01298	0.98997	5.18783e-18
	0.01296	0.98662	5.18077e-18
	0.01294	0.98328	5.17367e-18
	0.01293	0.97993	5.16654e-18
	0.01291	0.97659	5.15939e-18
	0.01289	0.97324	5.15221e-18
	0.01287	0.9699	5.14499e-18
	0.01285	0.96656	5.13775e-18
	0.01284	0.96321	5.13048e-18
	0.01282	0.95987	5.12318e-18
	0.0128	0.95652	5.11585e-18
	0.01278	0.95318	5.10848e-18
	0.01276	0.94983	5.10109e-18
	0.01274	0.94649	5.09367e-18
	0.01273	0.94314	5.08621e-18
	0.01271	0.9398	5.07873e-18
	0.01269	0.93645	5.07121e-18
	0.01267	0.93311	5.06367e-18
	0.01265	0.92977	5.05609e-18
	0.01263	0.92642	5.04847e-18
	0.01261	0.92308	5.04083e-18
	0.01259	0.91973	5.03316e-18
	0.01257	0.91639	5.02545e-18
	0.01255	0.91304	5.01771e-18
	0.01253	0.9097	5.00993e-18
	0.01252	0.90635	5.00213e-18
	0.0125	0.90301	4.99429e-18
	0.01248	0.89967	4.98641e-18
	0.01246	0.89632	4.97851e-18
	0.01244	0.89298	4.97057e-18
	0.01242	0.88963	4.96259e-18
	0.0124	0.88629	4.95458e-18
	0.01238	0.88294	4.94654e-18
	0.01236	0.8796	4.93846e-18
	0.01234	0.87625	4.93035e-18
	0.01232	0.87291	4.9222e-18
	0.01229	0.86957	4.91401e-18
	0.01227	0.86622	4.90579e-18
	0.01225	0.86288	4.89754e-18
	0.01223	0.85953	4.88924e-18
	0.01221	0.85619	4.88092e-18
	0.01219	0.85284	4.87255e-18
	0.01217	0.8495	4.86415e-18
	0.01215	0.84615	4.85571e-18
	0.01213	0.84281	4.84723e-18
	0.01211	0.83946	4.83872e-18
	0.01209	0.83612	4.83017e-18
	0.01206	0.83278	4.82157e-18
	0.01204	0.82943	4.81295e-18
	0.01202	0.82609	4.80428e-18
	0.012	0.82274	4.79557e-18
	0.01198	0.8194	4.78683e-18
	0.01195	0.81605	4.77804e-18
	0.01193	0.81271	4.76922e-18
	0.01191	0.80936	4.76035e-18
	0.01189	0.80602	4.75145e-18
	0.01187	0.80268	4.7425e-18
	0.01184	0.79933	4.73351e-18
	0.01182	0.79599	4.72449e-18
	0.0118	0.79264	4.71542e-18
	0.01178	0.7893	4.70631e-18
	0.01175	0.78595	4.69715e-18
	0.01173	0.78261	4.68796e-18
	0.01171	0.77926	4.67872e-18
	0.01168	0.77592	4.66944e-18
	0.01166	0.77258	4.66012e-18
	0.01164	0.76923	4.65075e-18
	0.01161	0.76589	4.64134e-18
	0.01159	0.76254	4.63189e-18
	0.01157	0.7592	4.62239e-18
	0.01154	0.75585	4.61285e-18
	0.01152	0.75251	4.60326e-18
	0.01149	0.74916	4.59362e-18
	0.01147	0.74582	4.58394e-18
	0.01144	0.74247	4.57422e-18
	0.01142	0.73913	4.56445e-18
	0.0114	0.73579	4.55463e-18
	0.01137	0.73244	4.54476e-18
	0.01135	0.7291	4.53485e-18
	0.01132	0.72575	4.52489e-18
	0.0113	0.72241	4.51488e-18
	0.01127	0.71906	4.50483e-18
	0.01125	0.71572	4.49472e-18
	0.01122	0.71237	4.48457e-18
	0.01119	0.70903	4.47436e-18
	0.01117	0.70569	4.46411e-18
	0.01114	0.70234	4.45381e-18
	0.01112	0.699	4.44345e-18
	0.01109	0.69565	4.43305e-18
	0.01107	0.69231	4.42259e-18
	0.01104	0.68896	4.41209e-18
	0.01101	0.68562	4.40153e-18
	0.01099	0.68227	4.39092e-18
	0.01096	0.67893	4.38025e-18
	0.01093	0.67559	4.36953e-18
	0.01091	0.67224	4.35876e-18
	0.01088	0.6689	4.34794e-18
	0.01085	0.66555	4.33706e-18
	0.01082	0.66221	4.32612e-18
	0.0108	0.65886	4.31514e-18
	0.01077	0.65552	4.30409e-18
	0.01074	0.65217	4.29299e-18
	0.01071	0.64883	4.28183e-18
	0.01069	0.64548	4.27062e-18
	0.01066	0.64214	4.25935e-18
	0.01063	0.6388	4.24802e-18
	0.0106	0.63545	4.23663e-18
	0.01057	0.63211	4.22518e-18
	0.01054	0.62876	4.21368e-18
	0.01051	0.62542	4.20211e-18
	0.01048	0.62207	4.19049e-18
	0.01046	0.61873	4.1788e-18
	0.01043	0.61538	4.16706e-18
	0.0104	0.61204	4.15525e-18
	0.01037	0.6087	4.14338e-18
	0.01034	0.60535	4.13145e-18
	0.01031	0.60201	4.11945e-18
	0.01028	0.59866	4.1074e-18
	0.01025	0.59532	4.09527e-18
	0.01022	0.59197	4.08309e-18
	0.01019	0.58863	4.07083e-18
	0.01015	0.58528	4.05852e-18
	0.01012	0.58194	4.04613e-18
	0.01009	0.5786	4.03369e-18
	0.01006	0.57525	4.02117e-18
	0.01003	0.57191	4.00858e-18
	0.01	0.56856	3.99593e-18
	0.00997	0.56522	3.98321e-18
	0.00993	0.56187	3.97042e-18
	0.0099	0.55853	3.95756e-18
	0.00987	0.55518	3.94463e-18
	0.00984	0.55184	3.93163e-18
	0.0098	0.5485	3.91856e-18
	0.00977	0.54515	3.90541e-18
	0.00974	0.54181	3.89219e-18
	0.00971	0.53846	3.8789e-18
	0.00967	0.53512	3.86554e-18
	0.00964	0.53177	3.8521e-18
	0.0096	0.52843	3.83858e-18
	0.00957	0.52508	3.82499e-18
	0.00954	0.52174	3.81132e-18
	0.0095	0.51839	3.79758e-18
	0.00947	0.51505	3.78376e-18
	0.00943	0.51171	3.76985e-18
	0.0094	0.50836	3.75587e-18
	0.00936	0.50502	3.74181e-18
	0.00933	0.50167	3.72767e-18
	0.00929	0.49833	3.71345e-18
	0.00926	0.49498	3.69915e-18
	0.00922	0.49164	3.68476e-18
	0.00918	0.48829	3.67029e-18
	0.00915	0.48495	3.65574e-18
	0.00911	0.48161	3.6411e-18
	0.00907	0.47826	3.62638e-18
	0.00904	0.47492	3.61157e-18
	0.009	0.47157	3.59667e-18
	0.00896	0.46823	3.58169e-18
	0.00892	0.46488	3.56661e-18
	0.00889	0.46154	3.55145e-18
	0.00885	0.45819	3.5362e-18
	0.00881	0.45485	3.52086e-18
	0.00877	0.45151	3.50542e-18
	0.00873	0.44816	3.48989e-18
	0.00869	0.44482	3.47427e-18
	0.00865	0.44147	3.45855e-18
	0.00861	0.43813	3.44274e-18
	0.00857	0.43478	3.42684e-18
	0.00853	0.43144	3.41083e-18
	0.00849	0.42809	3.39473e-18
	0.00845	0.42475	3.37853e-18
	0.00841	0.4214	3.36223e-18
	0.00837	0.41806	3.34583e-18
	0.00833	0.41472	3.32933e-18
	0.00829	0.41137	3.31272e-18
	0.00825	0.40803	3.29602e-18
	0.0082	0.40468	3.2792e-18
	0.00816	0.40134	3.26229e-18
	0.00812	0.39799	3.24526e-18
	0.00808	0.39465	3.22813e-18
	0.00803	0.3913	3.21089e-18
	0.00799	0.38796	3.19354e-18
	0.00795	0.38462	3.17609e-18
	0.0079	0.38127	3.15852e-18
	0.00786	0.37793	3.14083e-18
	0.00781	0.37458	3.12304e-18
	0.00777	0.37124	3.10513e-18
	0.00772	0.36789	3.0871e-18
	0.00768	0.36455	3.06895e-18
	0.00763	0.3612	3.05069e-18
	0.00759	0.35786	3.03231e-18
	0.00754	0.35452	3.01381e-18
	0.00749	0.35117	2.99519e-18
	0.00745	0.34783	2.97644e-18
	0.0074	0.34448	2.95757e-18
	0.00735	0.34114	2.93858e-18
	0.0073	0.33779	2.91946e-18
	0.00726	0.33445	2.90021e-18
	0.00721	0.3311	2.88083e-18
	0.00716	0.32776	2.86132e-18
	0.00711	0.32441	2.84168e-18
	0.00706	0.32107	2.82191e-18
	0.00701	0.31773	2.802e-18
	0.00696	0.31438	2.78195e-18
	0.00691	0.31104	2.76177e-18
	0.00686	0.30769	2.74145e-18
	0.00681	0.30435	2.721e-18
	0.00676	0.301	2.70039e-18
	0.0067	0.29766	2.67965e-18
	0.00665	0.29431	2.65876e-18
	0.0066	0.29097	2.63773e-18
	0.00655	0.28763	2.61655e-18
	0.00649	0.28428	2.59522e-18
	0.00644	0.28094	2.57374e-18
	0.00639	0.27759	2.55211e-18
	0.00633	0.27425	2.53032e-18
	0.00628	0.2709	2.50838e-18
	0.00622	0.26756	2.48628e-18
	0.00616	0.26421	2.46402e-18
	0.00611	0.26087	2.4416e-18
	0.00605	0.25753	2.41902e-18
	0.006	0.25418	2.39628e-18
	0.00594	0.25084	2.37337e-18
	0.00588	0.24749	2.35029e-18
	0.00582	0.24415	2.32704e-18
	0.00576	0.2408	2.30362e-18
	0.0057	0.23746	2.28003e-18
	0.00565	0.23411	2.25626e-18
	0.00559	0.23077	2.23232e-18
	0.00552	0.22742	2.20819e-18
	0.00546	0.22408	2.18389e-18
	0.0054	0.22074	2.1594e-18
	0.00534	0.21739	2.13473e-18
	0.00528	0.21405	2.10987e-18
	0.00522	0.2107	2.08482e-18
	0.00515	0.20736	2.05958e-18
	0.00509	0.20401	2.03414e-18
	0.00503	0.20067	2.00851e-18
	0.00496	0.19732	1.98268e-18
	0.0049	0.19398	1.95665e-18
	0.00483	0.19064	1.93041e-18
	0.00476	0.18729	1.90397e-18
	0.0047	0.18395	1.87733e-18
	0.00463	0.1806	1.85047e-18
	0.00456	0.17726	1.8234e-18
	0.00449	0.17391	1.79611e-18
	0.00443	0.17057	1.76861e-18
	0.00436	0.16722	1.74088e-18
	0.00429	0.16388	1.71294e-18
	0.00422	0.16054	1.68476e-18
	0.00414	0.15719	1.65636e-18
	0.00407	0.15385	1.62772e-18
	0.004	0.1505	1.59886e-18
	0.00393	0.14716	1.56975e-18
	0.00385	0.14381	1.5404e-18
	0.00378	0.14047	1.51081e-18
	0.00371	0.13712	1.48098e-18
	0.00363	0.13378	1.45089e-18
	0.00355	0.13043	1.42056e-18
	0.00348	0.12709	1.38996e-18
	0.0034	0.12375	1.35911e-18
	0.00332	0.1204	1.328e-18
	0.00324	0.11706	1.29662e-18
	0.00316	0.11371	1.26497e-18
	0.00309	0.11037	1.23305e-18
	0.003	0.10702	1.20085e-18
	0.00292	0.10368	1.16838e-18
	0.00284	0.10033	1.13562e-18
	0.00276	0.09699	1.10257e-18
	0.00268	0.09365	1.06923e-18
	0.00259	0.0903	1.0356e-18
	0.00251	0.08696	1.00167e-18
	0.00242	0.08361	9.67439e-19
	0.00233	0.08027	9.329e-19
	0.00225	0.07692	8.9805e-19
	0.00216	0.07358	8.62885e-19
	0.00207	0.07023	8.27401e-19
	0.00198	0.06689	7.91594e-19
	0.00189	0.06355	7.55458e-19
	0.0018	0.0602	7.1899e-19
	0.00171	0.05686	6.82185e-19
	0.00161	0.05351	6.45038e-19
	0.00152	0.05017	6.07545e-19
	0.00143	0.04682	5.697e-19
	0.00133	0.04348	5.31498e-19
	0.00123	0.04013	4.92935e-19
	0.00114	0.03679	4.54005e-19
	0.00104	0.03344	4.14704e-19
	0.000938312	0.0301	3.75025e-19
	0.000838078	0.02676	3.34963e-19
	0.000736873	0.02341	2.94513e-19
	0.000634681	0.02007	2.5367e-19
	0.00053149	0.01672	2.12426e-19
	0.000427284	0.01338	1.70777e-19
	0.000322047	0.01003	1.28716e-19
	0.000215765	0.00669	8.62372e-20
	0.000108423	0.00334	4.33345e-20
	3.25801e-09	1e-07	1.30216e-24
	0.01629	1	6.51108e-18
	0.01627	0.99666	6.50235e-18
	0.01625	0.99331	6.49359e-18
	0.01622	0.98997	6.48479e-18
	0.0162	0.98662	6.47596e-18
	0.01618	0.98328	6.46709e-18
	0.01616	0.97993	6.45818e-18
	0.01614	0.97659	6.44924e-18
	0.01611	0.97324	6.44026e-18
	0.01609	0.9699	6.43124e-18
	0.01607	0.96656	6.42219e-18
	0.01605	0.96321	6.4131e-18
	0.01602	0.95987	6.40397e-18
	0.016	0.95652	6.39481e-18
	0.01598	0.95318	6.38561e-18
	0.01595	0.94983	6.37636e-18
	0.01593	0.94649	6.36709e-18
	0.01591	0.94314	6.35777e-18
	0.01588	0.9398	6.34841e-18
	0.01586	0.93645	6.33902e-18
	0.01584	0.93311	6.32958e-18
	0.01581	0.92977	6.32011e-18
	0.01579	0.92642	6.31059e-18
	0.01577	0.92308	6.30104e-18
	0.01574	0.91973	6.29144e-18
	0.01572	0.91639	6.28181e-18
	0.01569	0.91304	6.27213e-18
	0.01567	0.9097	6.26242e-18
	0.01564	0.90635	6.25266e-18
	0.01562	0.90301	6.24286e-18
	0.0156	0.89967	6.23302e-18
	0.01557	0.89632	6.22313e-18
	0.01555	0.89298	6.21321e-18
	0.01552	0.88963	6.20324e-18
	0.0155	0.88629	6.19323e-18
	0.01547	0.88294	6.18317e-18
	0.01545	0.8796	6.17307e-18
	0.01542	0.87625	6.16293e-18
	0.01539	0.87291	6.15275e-18
	0.01537	0.86957	6.14252e-18
	0.01534	0.86622	6.13224e-18
	0.01532	0.86288	6.12192e-18
	0.01529	0.85953	6.11156e-18
	0.01527	0.85619	6.10114e-18
	0.01524	0.85284	6.09069e-18
	0.01521	0.8495	6.08019e-18
	0.01519	0.84615	6.06964e-18
	0.01516	0.84281	6.05904e-18
	0.01513	0.83946	6.0484e-18
	0.01511	0.83612	6.03771e-18
	0.01508	0.83278	6.02697e-18
	0.01505	0.82943	6.01618e-18
	0.01503	0.82609	6.00535e-18
	0.015	0.82274	5.99446e-18
	0.01497	0.8194	5.98353e-18
	0.01494	0.81605	5.97255e-18
	0.01492	0.81271	5.96152e-18
	0.01489	0.80936	5.95044e-18
	0.01486	0.80602	5.93931e-18
	0.01483	0.80268	5.92813e-18
	0.0148	0.79933	5.91689e-18
	0.01478	0.79599	5.90561e-18
	0.01475	0.79264	5.89427e-18
	0.01472	0.7893	5.88288e-18
	0.01469	0.78595	5.87144e-18
	0.01466	0.78261	5.85995e-18
	0.01463	0.77926	5.8484e-18
	0.0146	0.77592	5.8368e-18
	0.01457	0.77258	5.82515e-18
	0.01455	0.76923	5.81344e-18
	0.01452	0.76589	5.80168e-18
	0.01449	0.76254	5.78986e-18
	0.01446	0.7592	5.77799e-18
	0.01443	0.75585	5.76606e-18
	0.0144	0.75251	5.75407e-18
	0.01437	0.74916	5.74203e-18
	0.01434	0.74582	5.72993e-18
	0.01431	0.74247	5.71777e-18
	0.01428	0.73913	5.70556e-18
	0.01424	0.73579	5.69329e-18
	0.01421	0.73244	5.68095e-18
	0.01418	0.7291	5.66856e-18
	0.01415	0.72575	5.65611e-18
	0.01412	0.72241	5.6436e-18
	0.01409	0.71906	5.63103e-18
	0.01406	0.71572	5.6184e-18
	0.01403	0.71237	5.60571e-18
	0.01399	0.70903	5.59296e-18
	0.01396	0.70569	5.58014e-18
	0.01393	0.70234	5.56726e-18
	0.0139	0.699	5.55432e-18
	0.01386	0.69565	5.54131e-18
	0.01383	0.69231	5.52824e-18
	0.0138	0.68896	5.51511e-18
	0.01377	0.68562	5.50191e-18
	0.01373	0.68227	5.48865e-18
	0.0137	0.67893	5.47531e-18
	0.01367	0.67559	5.46192e-18
	0.01363	0.67224	5.44845e-18
	0.0136	0.6689	5.43492e-18
	0.01356	0.66555	5.42132e-18
	0.01353	0.66221	5.40766e-18
	0.0135	0.65886	5.39392e-18
	0.01346	0.65552	5.38011e-18
	0.01343	0.65217	5.36624e-18
	0.01339	0.64883	5.35229e-18
	0.01336	0.64548	5.33827e-18
	0.01332	0.64214	5.32418e-18
	0.01329	0.6388	5.31002e-18
	0.01325	0.63545	5.29579e-18
	0.01321	0.63211	5.28148e-18
	0.01318	0.62876	5.2671e-18
	0.01314	0.62542	5.25264e-18
	0.01311	0.62207	5.23811e-18
	0.01307	0.61873	5.22351e-18
	0.01303	0.61538	5.20882e-18
	0.013	0.61204	5.19406e-18
	0.01296	0.6087	5.17923e-18
	0.01292	0.60535	5.16431e-18
	0.01288	0.60201	5.14932e-18
	0.01285	0.59866	5.13424e-18
	0.01281	0.59532	5.11909e-18
	0.01277	0.59197	5.10386e-18
	0.01273	0.58863	5.08854e-18
	0.01269	0.58528	5.07315e-18
	0.01265	0.58194	5.05767e-18
	0.01262	0.5786	5.04211e-18
	0.01258	0.57525	5.02646e-18
	0.01254	0.57191	5.01073e-18
	0.0125	0.56856	4.99492e-18
	0.01246	0.56522	4.97901e-18
	0.01242	0.56187	4.96303e-18
	0.01238	0.55853	4.94695e-18
	0.01234	0.55518	4.93079e-18
	0.0123	0.55184	4.91454e-18
	0.01226	0.5485	4.89819e-18
	0.01221	0.54515	4.88176e-18
	0.01217	0.54181	4.86524e-18
	0.01213	0.53846	4.84863e-18
	0.01209	0.53512	4.83192e-18
	0.01205	0.53177	4.81512e-18
	0.01201	0.52843	4.79823e-18
	0.01196	0.52508	4.78124e-18
	0.01192	0.52174	4.76415e-18
	0.01188	0.51839	4.74697e-18
	0.01183	0.51505	4.72969e-18
	0.01179	0.51171	4.71232e-18
	0.01175	0.50836	4.69484e-18
	0.0117	0.50502	4.67727e-18
	0.01166	0.50167	4.65959e-18
	0.01161	0.49833	4.64182e-18
	0.01157	0.49498	4.62394e-18
	0.01152	0.49164	4.60595e-18
	0.01148	0.48829	4.58787e-18
	0.01143	0.48495	4.56968e-18
	0.01139	0.48161	4.55138e-18
	0.01134	0.47826	4.53297e-18
	0.0113	0.47492	4.51446e-18
	0.01125	0.47157	4.49584e-18
	0.0112	0.46823	4.47711e-18
	0.01115	0.46488	4.45827e-18
	0.01111	0.46154	4.43932e-18
	0.01106	0.45819	4.42025e-18
	0.01101	0.45485	4.40107e-18
	0.01096	0.45151	4.38178e-18
	0.01091	0.44816	4.36237e-18
	0.01087	0.44482	4.34284e-18
	0.01082	0.44147	4.32319e-18
	0.01077	0.43813	4.30343e-18
	0.01072	0.43478	4.28355e-18
	0.01067	0.43144	4.26354e-18
	0.01062	0.42809	4.24341e-18
	0.01057	0.42475	4.22316e-18
	0.01052	0.4214	4.20279e-18
	0.01046	0.41806	4.18229e-18
	0.01041	0.41472	4.16166e-18
	0.01036	0.41137	4.1409e-18
	0.01031	0.40803	4.12002e-18
	0.01026	0.40468	4.09901e-18
	0.0102	0.40134	4.07786e-18
	0.01015	0.39799	4.05658e-18
	0.0101	0.39465	4.03517e-18
	0.01004	0.3913	4.01362e-18
	0.00999	0.38796	3.99193e-18
	0.00993	0.38462	3.97011e-18
	0.00988	0.38127	3.94814e-18
	0.00982	0.37793	3.92604e-18
	0.00977	0.37458	3.9038e-18
	0.00971	0.37124	3.88141e-18
	0.00965	0.36789	3.85887e-18
	0.0096	0.36455	3.83619e-18
	0.00954	0.3612	3.81337e-18
	0.00948	0.35786	3.79039e-18
	0.00943	0.35452	3.76726e-18
	0.00937	0.35117	3.74398e-18
	0.00931	0.34783	3.72055e-18
	0.00925	0.34448	3.69696e-18
	0.00919	0.34114	3.67322e-18
	0.00913	0.33779	3.64932e-18
	0.00907	0.33445	3.62526e-18
	0.00901	0.3311	3.60103e-18
	0.00895	0.32776	3.57665e-18
	0.00889	0.32441	3.5521e-18
	0.00883	0.32107	3.52738e-18
	0.00876	0.31773	3.5025e-18
	0.0087	0.31438	3.47744e-18
	0.00864	0.31104	3.45222e-18
	0.00857	0.30769	3.42682e-18
	0.00851	0.30435	3.40124e-18
	0.00845	0.301	3.37549e-18
	0.00838	0.29766	3.34956e-18
	0.00832	0.29431	3.32345e-18
	0.00825	0.29097	3.29716e-18
	0.00818	0.28763	3.27069e-18
	0.00812	0.28428	3.24402e-18
	0.00805	0.28094	3.21717e-18
	0.00798	0.27759	3.19013e-18
	0.00791	0.27425	3.1629e-18
	0.00784	0.2709	3.13547e-18
	0.00778	0.26756	3.10785e-18
	0.00771	0.26421	3.08003e-18
	0.00764	0.26087	3.052e-18
	0.00757	0.25753	3.02378e-18
	0.00749	0.25418	2.99535e-18
	0.00742	0.25084	2.96671e-18
	0.00735	0.24749	2.93786e-18
	0.00728	0.24415	2.9088e-18
	0.0072	0.2408	2.87953e-18
	0.00713	0.23746	2.85004e-18
	0.00706	0.23411	2.82033e-18
	0.00698	0.23077	2.7904e-18
	0.00691	0.22742	2.76024e-18
	0.00683	0.22408	2.72986e-18
	0.00675	0.22074	2.69925e-18
	0.00668	0.21739	2.66841e-18
	0.0066	0.21405	2.63734e-18
	0.00652	0.2107	2.60602e-18
	0.00644	0.20736	2.57447e-18
	0.00636	0.20401	2.54268e-18
	0.00628	0.20067	2.51064e-18
	0.0062	0.19732	2.47835e-18
	0.00612	0.19398	2.44581e-18
	0.00604	0.19064	2.41302e-18
	0.00595	0.18729	2.37997e-18
	0.00587	0.18395	2.34666e-18
	0.00579	0.1806	2.31309e-18
	0.0057	0.17726	2.27925e-18
	0.00562	0.17391	2.24514e-18
	0.00553	0.17057	2.21076e-18
	0.00544	0.16722	2.1761e-18
	0.00536	0.16388	2.14117e-18
	0.00527	0.16054	2.10595e-18
	0.00518	0.15719	2.07045e-18
	0.00509	0.15385	2.03466e-18
	0.005	0.1505	1.99857e-18
	0.00491	0.14716	1.96219e-18
	0.00482	0.14381	1.9255e-18
	0.00473	0.14047	1.88852e-18
	0.00463	0.13712	1.85122e-18
	0.00454	0.13378	1.81362e-18
	0.00444	0.13043	1.7757e-18
	0.00435	0.12709	1.73746e-18
	0.00425	0.12375	1.69889e-18
	0.00415	0.1204	1.66e-18
	0.00406	0.11706	1.62077e-18
	0.00396	0.11371	1.58121e-18
	0.00386	0.11037	1.54131e-18
	0.00376	0.10702	1.50107e-18
	0.00365	0.10368	1.46047e-18
	0.00355	0.10033	1.41952e-18
	0.00345	0.09699	1.37821e-18
	0.00334	0.09365	1.33654e-18
	0.00324	0.0903	1.2945e-18
	0.00313	0.08696	1.25209e-18
	0.00303	0.08361	1.2093e-18
	0.00292	0.08027	1.16613e-18
	0.00281	0.07692	1.12256e-18
	0.0027	0.07358	1.07861e-18
	0.00259	0.07023	1.03425e-18
	0.00248	0.06689	9.89492e-19
	0.00236	0.06355	9.44323e-19
	0.00225	0.0602	8.98738e-19
	0.00213	0.05686	8.52731e-19
	0.00202	0.05351	8.06298e-19
	0.0019	0.05017	7.59431e-19
	0.00178	0.04682	7.12124e-19
	0.00166	0.04348	6.64373e-19
	0.00154	0.04013	6.16169e-19
	0.00142	0.03679	5.67507e-19
	0.0013	0.03344	5.1838e-19
	0.00117	0.0301	4.68781e-19
	0.00105	0.02676	4.18704e-19
	0.000921091	0.02341	3.68142e-19
	0.000793352	0.02007	3.17087e-19
	0.000664362	0.01672	2.65533e-19
	0.000534104	0.01338	2.13471e-19
	0.000402559	0.01003	1.60895e-19
	0.000269707	0.00669	1.07797e-19
	0.000135529	0.00334	5.41681e-20
	4.07251e-09	1e-07	1.6277e-24
	0.01955	1	1.17199e-17
	0.01952	0.99666	1.17042e-17
	0.0195	0.99331	1.16885e-17
	0.01947	0.98997	1.16726e-17
	0.01944	0.98662	1.16567e-17
	0.01942	0.98328	1.16408e-17
	0.01939	0.97993	1.16247e-17
	0.01936	0.97659	1.16086e-17
	0.01934	0.97324	1.15925e-17
	0.01931	0.9699	1.15762e-17
	0.01928	0.96656	1.15599e-17
	0.01925	0.96321	1.15436e-17
	0.01923	0.95987	1.15272e-17
	0.0192	0.95652	1.15107e-17
	0.01917	0.95318	1.14941e-17
	0.01914	0.94983	1.14775e-17
	0.01912	0.94649	1.14608e-17
	0.01909	0.94314	1.1444e-17
	0.01906	0.9398	1.14271e-17
	0.01903	0.93645	1.14102e-17
	0.019	0.93311	1.13932e-17
	0.01898	0.92977	1.13762e-17
	0.01895	0.92642	1.13591e-17
	0.01892	0.92308	1.13419e-17
	0.01889	0.91973	1.13246e-17
	0.01886	0.91639	1.13073e-17
	0.01883	0.91304	1.12898e-17
	0.0188	0.9097	1.12724e-17
	0.01877	0.90635	1.12548e-17
	0.01874	0.90301	1.12371e-17
	0.01871	0.89967	1.12194e-17
	0.01868	0.89632	1.12016e-17
	0.01865	0.89298	1.11838e-17
	0.01862	0.88963	1.11658e-17
	0.01859	0.88629	1.11478e-17
	0.01856	0.88294	1.11297e-17
	0.01853	0.8796	1.11115e-17
	0.0185	0.87625	1.10933e-17
	0.01847	0.87291	1.10749e-17
	0.01844	0.86957	1.10565e-17
	0.01841	0.86622	1.1038e-17
	0.01838	0.86288	1.10195e-17
	0.01835	0.85953	1.10008e-17
	0.01832	0.85619	1.09821e-17
	0.01829	0.85284	1.09632e-17
	0.01826	0.8495	1.09443e-17
	0.01822	0.84615	1.09253e-17
	0.01819	0.84281	1.09063e-17
	0.01816	0.83946	1.08871e-17
	0.01813	0.83612	1.08679e-17
	0.0181	0.83278	1.08485e-17
	0.01806	0.82943	1.08291e-17
	0.01803	0.82609	1.08096e-17
	0.018	0.82274	1.079e-17
	0.01796	0.8194	1.07704e-17
	0.01793	0.81605	1.07506e-17
	0.0179	0.81271	1.07307e-17
	0.01787	0.80936	1.07108e-17
	0.01783	0.80602	1.06908e-17
	0.0178	0.80268	1.06706e-17
	0.01776	0.79933	1.06504e-17
	0.01773	0.79599	1.06301e-17
	0.0177	0.79264	1.06097e-17
	0.01766	0.7893	1.05892e-17
	0.01763	0.78595	1.05686e-17
	0.01759	0.78261	1.05479e-17
	0.01756	0.77926	1.05271e-17
	0.01752	0.77592	1.05062e-17
	0.01749	0.77258	1.04853e-17
	0.01745	0.76923	1.04642e-17
	0.01742	0.76589	1.0443e-17
	0.01738	0.76254	1.04217e-17
	0.01735	0.7592	1.04004e-17
	0.01731	0.75585	1.03789e-17
	0.01728	0.75251	1.03573e-17
	0.01724	0.74916	1.03357e-17
	0.0172	0.74582	1.03139e-17
	0.01717	0.74247	1.0292e-17
	0.01713	0.73913	1.027e-17
	0.01709	0.73579	1.02479e-17
	0.01706	0.73244	1.02257e-17
	0.01702	0.7291	1.02034e-17
	0.01698	0.72575	1.0181e-17
	0.01694	0.72241	1.01585e-17
	0.01691	0.71906	1.01359e-17
	0.01687	0.71572	1.01131e-17
	0.01683	0.71237	1.00903e-17
	0.01679	0.70903	1.00673e-17
	0.01675	0.70569	1.00442e-17
	0.01672	0.70234	1.00211e-17
	0.01668	0.699	9.99777e-18
	0.01664	0.69565	9.97436e-18
	0.0166	0.69231	9.95084e-18
	0.01656	0.68896	9.9272e-18
	0.01652	0.68562	9.90344e-18
	0.01648	0.68227	9.87956e-18
	0.01644	0.67893	9.85557e-18
	0.0164	0.67559	9.83145e-18
	0.01636	0.67224	9.80722e-18
	0.01632	0.6689	9.78286e-18
	0.01628	0.66555	9.75838e-18
	0.01624	0.66221	9.73378e-18
	0.01619	0.65886	9.70905e-18
	0.01615	0.65552	9.6842e-18
	0.01611	0.65217	9.65923e-18
	0.01607	0.64883	9.63412e-18
	0.01603	0.64548	9.60889e-18
	0.01599	0.64214	9.58353e-18
	0.01594	0.6388	9.55804e-18
	0.0159	0.63545	9.53242e-18
	0.01586	0.63211	9.50666e-18
	0.01581	0.62876	9.48078e-18
	0.01577	0.62542	9.45476e-18
	0.01573	0.62207	9.4286e-18
	0.01568	0.61873	9.40231e-18
	0.01564	0.61538	9.37588e-18
	0.01559	0.61204	9.34931e-18
	0.01555	0.6087	9.32261e-18
	0.01551	0.60535	9.29576e-18
	0.01546	0.60201	9.26877e-18
	0.01542	0.59866	9.24164e-18
	0.01537	0.59532	9.21436e-18
	0.01532	0.59197	9.18694e-18
	0.01528	0.58863	9.15938e-18
	0.01523	0.58528	9.13167e-18
	0.01519	0.58194	9.1038e-18
	0.01514	0.5786	9.07579e-18
	0.01509	0.57525	9.04763e-18
	0.01504	0.57191	9.01932e-18
	0.015	0.56856	8.99085e-18
	0.01495	0.56522	8.96223e-18
	0.0149	0.56187	8.93345e-18
	0.01485	0.55853	8.90451e-18
	0.0148	0.55518	8.87542e-18
	0.01476	0.55184	8.84616e-18
	0.01471	0.5485	8.81675e-18
	0.01466	0.54515	8.78717e-18
	0.01461	0.54181	8.75743e-18
	0.01456	0.53846	8.72753e-18
	0.01451	0.53512	8.69746e-18
	0.01446	0.53177	8.66722e-18
	0.01441	0.52843	8.63681e-18
	0.01436	0.52508	8.60623e-18
	0.0143	0.52174	8.57548e-18
	0.01425	0.51839	8.54455e-18
	0.0142	0.51505	8.51345e-18
	0.01415	0.51171	8.48217e-18
	0.0141	0.50836	8.45072e-18
	0.01404	0.50502	8.41908e-18
	0.01399	0.50167	8.38727e-18
	0.01394	0.49833	8.35527e-18
	0.01388	0.49498	8.32309e-18
	0.01383	0.49164	8.29072e-18
	0.01377	0.48829	8.25816e-18
	0.01372	0.48495	8.22542e-18
	0.01367	0.48161	8.19248e-18
	0.01361	0.47826	8.15935e-18
	0.01355	0.47492	8.12603e-18
	0.0135	0.47157	8.09251e-18
	0.01344	0.46823	8.0588e-18
	0.01339	0.46488	8.02488e-18
	0.01333	0.46154	7.99077e-18
	0.01327	0.45819	7.95645e-18
	0.01321	0.45485	7.92193e-18
	0.01316	0.45151	7.8872e-18
	0.0131	0.44816	7.85226e-18
	0.01304	0.44482	7.81711e-18
	0.01298	0.44147	7.78175e-18
	0.01292	0.43813	7.74617e-18
	0.01286	0.43478	7.71038e-18
	0.0128	0.43144	7.67437e-18
	0.01274	0.42809	7.63814e-18
	0.01268	0.42475	7.60169e-18
	0.01262	0.4214	7.56502e-18
	0.01256	0.41806	7.52812e-18
	0.01249	0.41472	7.49099e-18
	0.01243	0.41137	7.45363e-18
	0.01237	0.40803	7.41604e-18
	0.01231	0.40468	7.37821e-18
	0.01224	0.40134	7.34015e-18
	0.01218	0.39799	7.30184e-18
	0.01212	0.39465	7.2633e-18
	0.01205	0.3913	7.22451e-18
	0.01199	0.38796	7.18548e-18
	0.01192	0.38462	7.14619e-18
	0.01185	0.38127	7.10666e-18
	0.01179	0.37793	7.06687e-18
	0.01172	0.37458	7.02683e-18
	0.01165	0.37124	6.98653e-18
	0.01159	0.36789	6.94597e-18
	0.01152	0.36455	6.90515e-18
	0.01145	0.3612	6.86406e-18
	0.01138	0.35786	6.8227e-18
	0.01131	0.35452	6.78107e-18
	0.01124	0.35117	6.73917e-18
	0.01117	0.34783	6.69699e-18
[truncated: 118,004 more rows]

## Sheet: Appendix 1-fig.2E
	Theoretical results								Experimental data
	0 μm CM (ι=0)		2 μm CM (ι=1.15*)		4 μm CM (ι=2.33*)		8 μm CM (ι=6.25*)		0 μm CM (ι=0)		2 μm CM (ι=1.15*)		4 μm CM (ι=2.33*)		8 μm CM (ι=6.25*)
	Obtained from analytical results combining Eqs. S79 and S160								Reference: Nature 528, 99-104 (2015)
	Growth rate (1/h)	Jacetate (mM /OD600/h)	Growth rate (1/h)	Jacetate (mM /OD600/h)	Growth rate (1/h)	Jacetate (mM /OD600/h)	Growth rate (1/h)	Jacetate (mM /OD600/h)	Growth rate (1/h)	Jacetate (mM /OD600/h)	Growth rate (1/h)	Jacetate (mM /OD600/h)	Growth rate (1/h)	Jacetate (mM /OD600/h)	Growth rate (1/h)	Jacetate (mM /OD600/h)
	0	0	0	0	0	0	0	0	0.35	-0.01	0.49	-0.02	0.45	-0.17	0.27	0
	0.01313	5.24833e-18	0.00899	3.5947e-18	0.0068	2.71647e-18	0.00375	1.49948e-18	0.55	-0.01	0.55	-0.01	0.5	0.7	0.31	0.76
	0.02626	2.62416e-17	0.01799	1.79735e-17	0.01359	1.08659e-17	0.0075	5.99791e-18	0.65	-0.01	0.6	0.12	0.58	1.58	0.36	1.44
	0.03939	1.10215e-16	0.02698	5.93125e-17	0.02039	4.07471e-17	0.01126	2.02429e-17	0.76	-0.01	0.68	1.35	0.61	2.05	0.39	1.6
	0.05253	3.67383e-16	0.03598	2.01303e-16	0.02719	1.35824e-16	0.01501	6.2978e-17	0.87	0.96	0.7	1.61	0.62	2.18	0.4	1.86
	0.06566	1.19399e-15	0.04497	6.11098e-16	0.03398	4.00679e-16	0.01876	1.79937e-16	0.92	2.3	0.74	2.25
	0.07879	3.6056e-15	0.05396	1.76859e-15	0.04078	1.12462e-15	0.02251	4.85831e-16	1.03	2.84
	0.09192	1.05072e-14	0.06296	4.8816e-15	0.04758	3.02343e-15	0.02626	1.26481e-15	1.16	4.15
	0.10505	2.95376e-14	0.07195	1.30847e-14	0.05437	7.8995e-15	0.03001	3.19089e-15
	0.11818	8.063e-14	0.08095	3.40993e-14	0.06117	2.00842e-14	0.03377	7.83402e-15
	0.13131	2.1442e-13	0.08994	8.66322e-14	0.06797	4.98336e-14	0.03752	1.88034e-14				* These values of the inhibition coefficient were fitted from experimental data
	0.14444	5.56735e-13	0.09893	2.15324e-13	0.07476	1.21049e-13	0.04127	4.42293e-14
	0.15758	1.4138e-12	0.10793	5.24215e-13	0.08156	2.88277e-13	0.04502	1.02105e-13
	0.17071	3.51614e-12	0.11692	1.25197e-12	0.08836	6.7397e-13	0.04877	2.31647e-13
	0.18384	8.57328e-12	0.12592	2.93618e-12	0.09515	1.54855e-12	0.05252	5.17029e-13
	0.19697	2.05108e-11	0.13491	6.76753e-12	0.10195	3.49956e-12	0.05628	1.13623e-12
	0.2101	4.81799e-11	0.1439	1.53402e-11	0.10875	7.78399e-12	0.06003	2.46022e-12
	0.22323	1.11183e-10	0.1529	3.42154e-11	0.11554	1.705e-11	0.06378	5.25141e-12
	0.23636	2.52169e-10	0.16189	7.5128e-11	0.12234	3.67943e-11	0.06753	1.10553e-11
	0.24949	5.62343e-10	0.17088	1.62456e-10	0.12914	7.8259e-11	0.07128	2.29625e-11
	0.26263	1.2334e-09	0.17988	3.46073e-10	0.13593	1.64107e-10	0.07503	4.70722e-11
	0.27576	2.66151e-09	0.18887	7.26468e-10	0.14273	3.39377e-10	0.07879	9.52636e-11
	0.28889	5.65164e-09	0.19787	1.5031e-09	0.14953	6.92312e-10	0.08254	1.90375e-10
	0.30202	1.18124e-08	0.20686	3.06603e-09	0.15632	1.39341e-09	0.08629	3.75757e-10
	0.31515	2.43055e-08	0.21585	6.1668e-09	0.16312	2.76753e-09	0.09004	7.32648e-10
	0.32828	4.92428e-08	0.22485	1.22324e-08	0.16992	5.4252e-09	0.09379	1.41139e-09
	0.34141	9.82473e-08	0.23384	2.3933e-08	0.17671	1.04981e-08	0.09754	2.68671e-09
	0.35455	1.93062e-07	0.24284	4.61925e-08	0.18351	2.00556e-08	0.1013	5.0545e-09
	0.36768	3.73703e-07	0.25183	8.79607e-08	0.19031	3.78304e-08	0.10505	9.39869e-09
	0.38081	7.1262e-07	0.26082	1.65271e-07	0.1971	7.04651e-08	0.1088	1.72756e-08
	0.39394	1.33887e-06	0.26982	3.06434e-07	0.2039	1.29622e-07	0.11255	3.13921e-08
	0.40707	2.47861e-06	0.27881	5.60728e-07	0.21069	2.355e-07	0.1163	5.63983e-08
	0.4202	4.52176e-06	0.28781	1.0127e-06	0.21749	4.22622e-07	0.12005	1.00185e-07
	0.43333	8.12972e-06	0.2968	1.80532e-06	0.22429	7.49192e-07	0.12381	1.75982e-07
	0.44646	1.44061e-05	0.30579	3.17692e-06	0.23108	1.31204e-06	0.12756	3.05697e-07
	0.4596	2.51626e-05	0.31479	5.51913e-06	0.23788	2.27008e-06	0.13131	5.25167e-07
	0.47273	4.33246e-05	0.32378	9.46618e-06	0.24468	3.88068e-06	0.13506	8.92311e-07
	0.48586	7.35386e-05	0.33278	1.60305e-05	0.25147	6.55497e-06	0.13881	1.49959e-06
	0.49899	0.000123064	0.34177	2.68051e-05	0.25827	1.0941e-05	0.14256	2.49282e-06
	0.51212	0.000203052	0.35076	4.42597e-05	0.26507	1.80465e-05	0.14632	4.09915e-06
	0.52525	0.000330352	0.35976	7.21687e-05	0.27186	2.94172e-05	0.15007	6.66812e-06
	0.53838	0.000529994	0.36875	0.000116215	0.27866	4.7392e-05	0.15382	1.0731e-05
	0.55152	0.00083853	0.37775	0.000184831	0.28546	7.54619e-05	0.15757	1.70856e-05
	0.56465	0.00131	0.38674	0.000290344	0.29225	0.000118766	0.16132	2.69145e-05
	0.57778	0.00201	0.39573	0.000450503	0.29905	0.000184766	0.16507	4.19501e-05
	0.59091	0.00306	0.40473	0.00069049	0.30585	0.000284144	0.16883	6.46978e-05
	0.60404	0.00458	0.41372	0.00105	0.31264	0.000431981	0.17258	9.87357e-05
	0.61717	0.00676	0.42271	0.00156	0.31944	0.000649266	0.17633	0.00014911
	0.6303	0.00986	0.43171	0.00231	0.32624	0.000964796	0.18008	0.000222848
	0.64343	0.01418	0.4407	0.00337	0.33303	0.00142	0.18383	0.000329607
	0.65657	0.02012	0.4497	0.00487	0.33983	0.00206	0.18758	0.000482493
	0.6697	0.02818	0.45869	0.00694	0.34663	0.00296	0.19134	0.000699058
	0.68283	0.03895	0.46768	0.00978	0.35342	0.0042	0.19509	0.001
	0.69596	0.05314	0.47668	0.01362	0.36022	0.0059	0.19884	0.00142
	0.70909	0.07158	0.48567	0.01875	0.36702	0.0082	0.20259	0.002
	0.72222	0.09518	0.49467	0.02551	0.37381	0.01128	0.20634	0.00278
	0.73535	0.12498	0.50366	0.03431	0.38061	0.01533	0.21009	0.00383
	0.74848	0.16206	0.51265	0.04562	0.38741	0.02061	0.21385	0.00522
	0.76162	0.20754	0.52165	0.05997	0.3942	0.02742	0.2176	0.00705
	0.77475	0.26256	0.53064	0.07796	0.401	0.0361	0.22135	0.00942
	0.78788	0.32817	0.53964	0.10022	0.4078	0.04701	0.2251	0.01247
	0.80101	0.40532	0.54863	0.12742	0.41459	0.06059	0.22885	0.01635
	0.81414	0.49478	0.55762	0.16026	0.42139	0.07727	0.2326	0.02123
	0.82727	0.59706	0.56662	0.19939	0.42819	0.09755	0.23636	0.02729
	0.8404	0.71238	0.57561	0.24546	0.43498	0.12189	0.24011	0.03476
	0.85354	0.84062	0.58461	0.29902	0.44178	0.15077	0.24386	0.04385
	0.86667	0.98129	0.5936	0.36052	0.44858	0.18466	0.24761	0.0548
	0.8798	1.13348	0.60259	0.43027	0.45537	0.22394	0.25136	0.06786
	0.89293	1.29594	0.61159	0.50841	0.46217	0.26896	0.25512	0.08327
	0.90606	1.46704	0.62058	0.59489	0.46897	0.31997	0.25887	0.10124
	0.91919	1.64488	0.62958	0.68945	0.47576	0.37709	0.26262	0.12201
	0.93232	1.82734	0.63857	0.79158	0.48256	0.44033	0.26637	0.14573
	0.94545	2.01214	0.64756	0.9006	0.48936	0.50956	0.27012	0.17256
	0.95859	2.19701	0.65656	1.01559	0.49615	0.58449	0.27387	0.20259
	0.97172	2.37971	0.66555	1.13546	0.50295	0.66468	0.27763	0.23584
	0.98485	2.55816	0.67454	1.25898	0.50975	0.74956	0.28138	0.27229
	0.99798	2.73051	0.68354	1.38482	0.51654	0.8384	0.28513	0.31182
	1.01111	2.89523	0.69253	1.51161	0.52334	0.93039	0.28888	0.35428
	1.02424	3.05112	0.70153	1.63794	0.53014	1.02462	0.29263	0.39941
	1.03737	3.19732	0.71052	1.76252	0.53693	1.12012	0.29638	0.44689
	1.05051	3.33337	0.71951	1.88409	0.54373	1.21593	0.30014	0.49636
	1.06364	3.45912	0.72851	2.00159	0.55053	1.31107	0.30389	0.5474
	1.07677	3.57477	0.7375	2.11409	0.55732	1.40463	0.30764	0.59953
	1.0899	3.68073	0.7465	2.22089	0.56412	1.49576	0.31139	0.65229
	1.10303	3.77764	0.75549	2.32148	0.57092	1.58374	0.31514	0.70517
	1.11616	3.8663	0.76448	2.41554	0.57771	1.66794	0.31889	0.7577
	1.12929	3.94758	0.77348	2.50299	0.58451	1.74789	0.32265	0.80941
	1.14242	4.02238	0.78247	2.58388	0.5913	1.82325	0.3264	0.85989
	1.15556	4.09163	0.79147	2.65845	0.5981	1.89384	0.33015	0.90875
	1.16869	4.15619	0.80046	2.72706	0.6049	1.95959	0.3339	0.95568
	1.18182	4.21686	0.80945	2.79013	0.61169	2.02056	0.33765	1.00042
	1.19495	4.27438	0.81845	2.8482	0.61849	2.07691	0.3414	1.0428
	1.20808	4.32937	0.82744	2.90179	0.62529	2.1289	0.34516	1.08269
	1.22121	4.38237	0.83644	2.95147	0.63208	2.17683	0.34891	1.12003
	1.23434	4.43384	0.84543	2.99778	0.63888	2.22107	0.35266	1.15485
	1.24747	4.48414	0.85442	3.04123	0.64568	2.26199	0.35641	1.18719
	1.26061	4.53357	0.86342	3.0823	0.65247	2.29999	0.36016	1.21716
	1.27374	4.58235	0.87241	3.12141	0.65927	2.33546	0.36391	1.2449
	1.28687	4.63067	0.88141	3.15894	0.66607	2.36876	0.36767	1.27058
	1.3	4.67865	0.8904	3.19522	0.67286	2.40024	0.37142	1.29439

## Sheet: Appendix 1-fig.2H
	Relative substrate quality	Growth rate	Energy efficiency
	Normalized κpy (%)*	λ (1/h)	εf (1/s)	εr (1/s)
	The variable	Obtained from Eq. S96	Obtained from Eq. S93
	0.01	0.00244	1.15721e-05	3.85428e-05
	0.01003	0.00245	1.16077e-05	3.86613e-05
	0.01006	0.00246	1.16434e-05	3.87801e-05				* The κpy for pyruvate at saturated concentration was set to be 100%
	0.01009	0.00246	1.16792e-05	3.88993e-05
	0.01012	0.00247	1.17151e-05	3.90188e-05
	0.01015	0.00248	1.17511e-05	3.91387e-05
	0.01019	0.00249	1.17873e-05	3.9259e-05
	0.01022	0.0025	1.18235e-05	3.93797e-05
	0.01025	0.0025	1.18599e-05	3.95007e-05
	0.01028	0.00251	1.18964e-05	3.96221e-05
	0.01031	0.00252	1.1933e-05	3.97438e-05
	0.01034	0.00253	1.19697e-05	3.9866e-05
	0.01038	0.00253	1.20065e-05	3.99885e-05
	0.01041	0.00254	1.20434e-05	4.01114e-05
	0.01044	0.00255	1.20804e-05	4.02347e-05
	0.01047	0.00256	1.21176e-05	4.03583e-05
	0.0105	0.00257	1.21549e-05	4.04823e-05
	0.01054	0.00257	1.21922e-05	4.06067e-05
	0.01057	0.00258	1.22297e-05	4.07315e-05
	0.0106	0.00259	1.22674e-05	4.08567e-05
	0.01063	0.0026	1.23051e-05	4.09823e-05
	0.01067	0.0026	1.23429e-05	4.11082e-05
	0.0107	0.00261	1.23809e-05	4.12345e-05
	0.01073	0.00262	1.2419e-05	4.13612e-05
	0.01076	0.00263	1.24572e-05	4.14883e-05
	0.0108	0.00264	1.24955e-05	4.16158e-05
	0.01083	0.00264	1.25339e-05	4.17437e-05
	0.01086	0.00265	1.25725e-05	4.1872e-05
	0.0109	0.00266	1.26111e-05	4.20007e-05
	0.01093	0.00267	1.26499e-05	4.21298e-05
	0.01097	0.00268	1.26888e-05	4.22592e-05
	0.011	0.00269	1.27279e-05	4.23891e-05
	0.01103	0.00269	1.2767e-05	4.25193e-05
	0.01107	0.0027	1.28063e-05	4.265e-05
	0.0111	0.00271	1.28457e-05	4.27811e-05
	0.01113	0.00272	1.28852e-05	4.29125e-05
	0.01117	0.00273	1.29248e-05	4.30444e-05
	0.0112	0.00274	1.29646e-05	4.31767e-05
	0.01124	0.00274	1.30044e-05	4.33093e-05
	0.01127	0.00275	1.30444e-05	4.34424e-05
	0.01131	0.00276	1.30846e-05	4.35759e-05
	0.01134	0.00277	1.31248e-05	4.37098e-05
	0.01138	0.00278	1.31652e-05	4.38442e-05
	0.01141	0.00279	1.32057e-05	4.39789e-05
	0.01145	0.00279	1.32463e-05	4.4114e-05
	0.01148	0.0028	1.3287e-05	4.42496e-05
	0.01152	0.00281	1.33279e-05	4.43855e-05
	0.01155	0.00282	1.33689e-05	4.45219e-05
	0.01159	0.00283	1.341e-05	4.46587e-05
	0.01162	0.00284	1.34512e-05	4.4796e-05
	0.01166	0.00285	1.34926e-05	4.49336e-05
	0.0117	0.00285	1.35341e-05	4.50717e-05
	0.01173	0.00286	1.35757e-05	4.52102e-05
	0.01177	0.00287	1.36175e-05	4.53491e-05
	0.0118	0.00288	1.36594e-05	4.54885e-05
	0.01184	0.00289	1.37014e-05	4.56282e-05
	0.01188	0.0029	1.37435e-05	4.57684e-05
	0.01191	0.00291	1.37858e-05	4.59091e-05
	0.01195	0.00292	1.38282e-05	4.60501e-05
	0.01199	0.00293	1.38707e-05	4.61916e-05
	0.01202	0.00293	1.39134e-05	4.63336e-05
	0.01206	0.00294	1.39562e-05	4.6476e-05
	0.0121	0.00295	1.39991e-05	4.66188e-05
	0.01213	0.00296	1.40422e-05	4.6762e-05
	0.01217	0.00297	1.40854e-05	4.69057e-05
	0.01221	0.00298	1.41287e-05	4.70498e-05
	0.01225	0.00299	1.41721e-05	4.71944e-05
	0.01228	0.003	1.42157e-05	4.73394e-05
	0.01232	0.00301	1.42594e-05	4.74849e-05
	0.01236	0.00302	1.43033e-05	4.76308e-05
	0.0124	0.00303	1.43473e-05	4.77771e-05
	0.01244	0.00304	1.43914e-05	4.79239e-05
	0.01247	0.00304	1.44357e-05	4.80712e-05
	0.01251	0.00305	1.44801e-05	4.82189e-05
	0.01255	0.00306	1.45246e-05	4.8367e-05
	0.01259	0.00307	1.45693e-05	4.85156e-05
	0.01263	0.00308	1.46141e-05	4.86647e-05
	0.01267	0.00309	1.4659e-05	4.88142e-05
	0.01271	0.0031	1.47041e-05	4.89642e-05
	0.01275	0.00311	1.47494e-05	4.91147e-05
	0.01279	0.00312	1.47947e-05	4.92656e-05
	0.01282	0.00313	1.48402e-05	4.94169e-05
	0.01286	0.00314	1.48859e-05	4.95688e-05
	0.0129	0.00315	1.49317e-05	4.97211e-05
	0.01294	0.00316	1.49776e-05	4.98738e-05
	0.01298	0.00317	1.50236e-05	5.00271e-05
	0.01302	0.00318	1.50699e-05	5.01808e-05
	0.01306	0.00319	1.51162e-05	5.0335e-05
	0.0131	0.0032	1.51627e-05	5.04896e-05
	0.01314	0.00321	1.52093e-05	5.06447e-05
	0.01318	0.00322	1.52561e-05	5.08003e-05
	0.01322	0.00323	1.5303e-05	5.09564e-05
	0.01327	0.00324	1.53501e-05	5.1113e-05
	0.01331	0.00325	1.53973e-05	5.127e-05
	0.01335	0.00326	1.54447e-05	5.14275e-05
	0.01339	0.00327	1.54922e-05	5.15855e-05
	0.01343	0.00328	1.55398e-05	5.1744e-05
	0.01347	0.00329	1.55876e-05	5.1903e-05
	0.01351	0.0033	1.56356e-05	5.20625e-05
	0.01355	0.00331	1.56836e-05	5.22224e-05
	0.01359	0.00332	1.57319e-05	5.23829e-05
	0.01364	0.00333	1.57803e-05	5.25438e-05
	0.01368	0.00334	1.58288e-05	5.27052e-05
	0.01372	0.00335	1.58775e-05	5.28672e-05
	0.01376	0.00336	1.59263e-05	5.30296e-05
	0.01381	0.00337	1.59753e-05	5.31925e-05
	0.01385	0.00338	1.60244e-05	5.33559e-05
	0.01389	0.00339	1.60737e-05	5.35198e-05
	0.01393	0.0034	1.61232e-05	5.36843e-05
	0.01398	0.00341	1.61727e-05	5.38492e-05
	0.01402	0.00342	1.62225e-05	5.40146e-05
	0.01406	0.00343	1.62724e-05	5.41806e-05
	0.01411	0.00344	1.63224e-05	5.4347e-05
	0.01415	0.00345	1.63726e-05	5.4514e-05
	0.01419	0.00346	1.6423e-05	5.46815e-05
	0.01424	0.00347	1.64735e-05	5.48495e-05
	0.01428	0.00348	1.65242e-05	5.5018e-05
	0.01432	0.00349	1.6575e-05	5.5187e-05
	0.01437	0.0035	1.6626e-05	5.53565e-05
	0.01441	0.00351	1.66771e-05	5.55266e-05
	0.01446	0.00353	1.67284e-05	5.56972e-05
	0.0145	0.00354	1.67798e-05	5.58683e-05
	0.01455	0.00355	1.68315e-05	5.60399e-05
	0.01459	0.00356	1.68832e-05	5.62121e-05
	0.01463	0.00357	1.69351e-05	5.63848e-05
	0.01468	0.00358	1.69872e-05	5.6558e-05
	0.01473	0.00359	1.70395e-05	5.67317e-05
	0.01477	0.0036	1.70919e-05	5.6906e-05
	0.01482	0.00361	1.71445e-05	5.70808e-05
	0.01486	0.00362	1.71972e-05	5.72562e-05
	0.01491	0.00363	1.72501e-05	5.74321e-05
	0.01495	0.00365	1.73031e-05	5.76085e-05
	0.015	0.00366	1.73564e-05	5.77855e-05
	0.01505	0.00367	1.74097e-05	5.7963e-05
	0.01509	0.00368	1.74633e-05	5.8141e-05
	0.01514	0.00369	1.7517e-05	5.83196e-05
	0.01518	0.0037	1.75709e-05	5.84988e-05
	0.01523	0.00371	1.76249e-05	5.86785e-05
	0.01528	0.00372	1.76791e-05	5.88587e-05
	0.01532	0.00374	1.77335e-05	5.90395e-05
	0.01537	0.00375	1.7788e-05	5.92209e-05
	0.01542	0.00376	1.78427e-05	5.94028e-05
	0.01547	0.00377	1.78976e-05	5.95853e-05
	0.01551	0.00378	1.79527e-05	5.97683e-05
	0.01556	0.00379	1.80079e-05	5.99519e-05
	0.01561	0.00381	1.80633e-05	6.01361e-05
	0.01566	0.00382	1.81188e-05	6.03208e-05
	0.01571	0.00383	1.81745e-05	6.05061e-05
	0.01575	0.00384	1.82304e-05	6.0692e-05
	0.0158	0.00385	1.82865e-05	6.08784e-05
	0.01585	0.00386	1.83428e-05	6.10654e-05
	0.0159	0.00388	1.83992e-05	6.1253e-05
	0.01595	0.00389	1.84558e-05	6.14411e-05
	0.016	0.0039	1.85125e-05	6.16299e-05
	0.01605	0.00391	1.85695e-05	6.18192e-05
	0.0161	0.00392	1.86266e-05	6.20091e-05
	0.01615	0.00394	1.86839e-05	6.21995e-05
	0.0162	0.00395	1.87413e-05	6.23906e-05
	0.01625	0.00396	1.8799e-05	6.25822e-05
	0.0163	0.00397	1.88568e-05	6.27744e-05
	0.01635	0.00398	1.89148e-05	6.29673e-05
	0.0164	0.004	1.8973e-05	6.31607e-05
	0.01645	0.00401	1.90313e-05	6.33547e-05
	0.0165	0.00402	1.90898e-05	6.35493e-05
	0.01655	0.00403	1.91486e-05	6.37445e-05
	0.0166	0.00405	1.92074e-05	6.39403e-05
	0.01665	0.00406	1.92665e-05	6.41367e-05
	0.0167	0.00407	1.93258e-05	6.43337e-05
	0.01675	0.00408	1.93852e-05	6.45313e-05
	0.0168	0.00409	1.94448e-05	6.47295e-05
	0.01686	0.00411	1.95046e-05	6.49283e-05
	0.01691	0.00412	1.95646e-05	6.51277e-05
	0.01696	0.00413	1.96248e-05	6.53277e-05
	0.01701	0.00415	1.96852e-05	6.55284e-05
	0.01706	0.00416	1.97457e-05	6.57297e-05
	0.01712	0.00417	1.98064e-05	6.59315e-05
	0.01717	0.00418	1.98673e-05	6.6134e-05
	0.01722	0.0042	1.99285e-05	6.63372e-05
	0.01727	0.00421	1.99897e-05	6.65409e-05
	0.01733	0.00422	2.00512e-05	6.67453e-05
	0.01738	0.00423	2.01129e-05	6.69503e-05
	0.01743	0.00425	2.01748e-05	6.71559e-05
	0.01749	0.00426	2.02368e-05	6.73622e-05
	0.01754	0.00427	2.0299e-05	6.7569e-05
	0.0176	0.00429	2.03615e-05	6.77766e-05
	0.01765	0.0043	2.04241e-05	6.79847e-05
	0.0177	0.00431	2.04869e-05	6.81935e-05
	0.01776	0.00433	2.05499e-05	6.8403e-05
	0.01781	0.00434	2.06131e-05	6.8613e-05
	0.01787	0.00435	2.06765e-05	6.88238e-05
	0.01792	0.00437	2.07401e-05	6.90351e-05
	0.01798	0.00438	2.08039e-05	6.92472e-05
	0.01803	0.00439	2.08679e-05	6.94598e-05
	0.01809	0.00441	2.09321e-05	6.96732e-05
	0.01814	0.00442	2.09964e-05	6.98871e-05
	0.0182	0.00443	2.1061e-05	7.01018e-05
	0.01826	0.00445	2.11258e-05	7.0317e-05
	0.01831	0.00446	2.11908e-05	7.0533e-05
	0.01837	0.00447	2.12559e-05	7.07496e-05
	0.01843	0.00449	2.13213e-05	7.09669e-05
	0.01848	0.0045	2.13869e-05	7.11848e-05
	0.01854	0.00452	2.14527e-05	7.14034e-05
	0.0186	0.00453	2.15187e-05	7.16227e-05
	0.01865	0.00454	2.15848e-05	7.18427e-05
	0.01871	0.00456	2.16512e-05	7.20633e-05
	0.01877	0.00457	2.17178e-05	7.22846e-05
	0.01883	0.00458	2.17846e-05	7.25066e-05
	0.01888	0.0046	2.18516e-05	7.27293e-05
	0.01894	0.00461	2.19188e-05	7.29526e-05
	0.019	0.00463	2.19862e-05	7.31766e-05
	0.01906	0.00464	2.20538e-05	7.34014e-05
	0.01912	0.00465	2.21217e-05	7.36268e-05
	0.01918	0.00467	2.21897e-05	7.38529e-05
	0.01924	0.00468	2.2258e-05	7.40796e-05
	0.01929	0.0047	2.23264e-05	7.43071e-05
	0.01935	0.00471	2.23951e-05	7.45353e-05
	0.01941	0.00473	2.2464e-05	7.47642e-05
	0.01947	0.00474	2.2533e-05	7.49938e-05
	0.01953	0.00476	2.26023e-05	7.52241e-05
	0.01959	0.00477	2.26719e-05	7.54551e-05
	0.01965	0.00478	2.27416e-05	7.56868e-05
	0.01971	0.0048	2.28115e-05	7.59192e-05
	0.01977	0.00481	2.28817e-05	7.61523e-05
	0.01984	0.00483	2.29521e-05	7.63862e-05
	0.0199	0.00484	2.30226e-05	7.66207e-05
	0.01996	0.00486	2.30935e-05	7.6856e-05
	0.02002	0.00487	2.31645e-05	7.7092e-05
	0.02008	0.00489	2.32357e-05	7.73287e-05
	0.02014	0.0049	2.33072e-05	7.75662e-05
	0.0202	0.00492	2.33789e-05	7.78043e-05
	0.02027	0.00493	2.34508e-05	7.80432e-05
	0.02033	0.00495	2.35229e-05	7.82829e-05
	0.02039	0.00496	2.35952e-05	7.85232e-05
	0.02045	0.00498	2.36678e-05	7.87644e-05
	0.02052	0.00499	2.37406e-05	7.90062e-05
	0.02058	0.00501	2.38136e-05	7.92488e-05
	0.02064	0.00502	2.38869e-05	7.94921e-05
	0.02071	0.00504	2.39603e-05	7.97362e-05
	0.02077	0.00505	2.4034e-05	7.9981e-05
	0.02083	0.00507	2.41079e-05	8.02266e-05
	0.0209	0.00509	2.41821e-05	8.04729e-05
	0.02096	0.0051	2.42564e-05	8.072e-05
	0.02103	0.00512	2.4331e-05	8.09679e-05
	0.02109	0.00513	2.44059e-05	8.12165e-05
	0.02116	0.00515	2.44809e-05	8.14658e-05
	0.02122	0.00516	2.45562e-05	8.1716e-05
	0.02129	0.00518	2.46318e-05	8.19668e-05
	0.02135	0.0052	2.47075e-05	8.22185e-05
	0.02142	0.00521	2.47835e-05	8.24709e-05
	0.02148	0.00523	2.48597e-05	8.27242e-05
	0.02155	0.00524	2.49362e-05	8.29781e-05
	0.02162	0.00526	2.50129e-05	8.32329e-05
	0.02168	0.00528	2.50898e-05	8.34884e-05
	0.02175	0.00529	2.5167e-05	8.37448e-05
	0.02182	0.00531	2.52444e-05	8.40019e-05
	0.02188	0.00532	2.5322e-05	8.42598e-05
	0.02195	0.00534	2.53999e-05	8.45185e-05
	0.02202	0.00536	2.5478e-05	8.4778e-05
	0.02209	0.00537	2.55564e-05	8.50382e-05
	0.02215	0.00539	2.5635e-05	8.52993e-05
	0.02222	0.00541	2.57138e-05	8.55612e-05
	0.02229	0.00542	2.57929e-05	8.58239e-05
	0.02236	0.00544	2.58722e-05	8.60873e-05
	0.02243	0.00545	2.59518e-05	8.63516e-05
	0.0225	0.00547	2.60316e-05	8.66167e-05
	0.02257	0.00549	2.61117e-05	8.68826e-05
	0.02264	0.00551	2.6192e-05	8.71494e-05
	0.0227	0.00552	2.62725e-05	8.74169e-05
	0.02277	0.00554	2.63533e-05	8.76853e-05
	0.02284	0.00556	2.64344e-05	8.79545e-05
	0.02292	0.00557	2.65157e-05	8.82245e-05
	0.02299	0.00559	2.65972e-05	8.84953e-05
	0.02306	0.00561	2.6679e-05	8.8767e-05
	0.02313	0.00562	2.67611e-05	8.90395e-05
	0.0232	0.00564	2.68434e-05	8.93128e-05
	0.02327	0.00566	2.69259e-05	8.9587e-05
	0.02334	0.00568	2.70087e-05	8.9862e-05
	0.02341	0.00569	2.70918e-05	9.01379e-05
	0.02348	0.00571	2.71751e-05	9.04146e-05
	0.02356	0.00573	2.72587e-05	9.06921e-05
	0.02363	0.00574	2.73425e-05	9.09705e-05
	0.0237	0.00576	2.74266e-05	9.12498e-05
	0.02378	0.00578	2.7511e-05	9.15299e-05
	0.02385	0.0058	2.75956e-05	9.18108e-05
	0.02392	0.00582	2.76805e-05	9.20927e-05
	0.024	0.00583	2.77656e-05	9.23753e-05
	0.02407	0.00585	2.7851e-05	9.26589e-05
	0.02414	0.00587	2.79366e-05	9.29433e-05
	0.02422	0.00589	2.80225e-05	9.32286e-05
	0.02429	0.0059	2.81087e-05	9.35148e-05
	0.02437	0.00592	2.81952e-05	9.38018e-05
	0.02444	0.00594	2.82819e-05	9.40898e-05
	0.02452	0.00596	2.83689e-05	9.43786e-05
	0.02459	0.00598	2.84561e-05	9.46683e-05
	0.02467	0.006	2.85436e-05	9.49588e-05
	0.02474	0.00601	2.86314e-05	9.52503e-05
	0.02482	0.00603	2.87195e-05	9.55427e-05
	0.0249	0.00605	2.88078e-05	9.58359e-05
	0.02497	0.00607	2.88964e-05	9.61301e-05
	0.02505	0.00609	2.89853e-05	9.64251e-05
	0.02513	0.00611	2.90744e-05	9.67211e-05
	0.0252	0.00612	2.91638e-05	9.7018e-05
	0.02528	0.00614	2.92535e-05	9.73157e-05
	0.02536	0.00616	2.93435e-05	9.76144e-05
	0.02544	0.00618	2.94337e-05	9.7914e-05
	0.02552	0.0062	2.95243e-05	9.82146e-05
	0.02559	0.00622	2.96151e-05	9.8516e-05
	0.02567	0.00624	2.97061e-05	9.88184e-05
	0.02575	0.00626	2.97975e-05	9.91216e-05
	0.02583	0.00628	2.98891e-05	9.94259e-05
	0.02591	0.00629	2.99811e-05	9.9731e-05
	0.02599	0.00631	3.00733e-05	0.000100037
	0.02607	0.00633	3.01658e-05	0.000100344
	0.02615	0.00635	3.02585e-05	0.000100652
	0.02623	0.00637	3.03516e-05	0.000100961
	0.02631	0.00639	3.04449e-05	0.000101271
	0.02639	0.00641	3.05386e-05	0.000101582
	0.02647	0.00643	3.06325e-05	0.000101893
	0.02655	0.00645	3.07267e-05	0.000102206
	0.02664	0.00647	3.08212e-05	0.00010252
	0.02672	0.00649	3.0916e-05	0.000102834
	0.0268	0.00651	3.10111e-05	0.00010315
	0.02688	0.00653	3.11064e-05	0.000103467
	0.02697	0.00655	3.12021e-05	0.000103784
	0.02705	0.00657	3.12981e-05	0.000104103
	0.02713	0.00659	3.13943e-05	0.000104422
	0.02722	0.00661	3.14909e-05	0.000104742
	0.0273	0.00663	3.15877e-05	0.000105064
	0.02738	0.00665	3.16849e-05	0.000105386
	0.02747	0.00667	3.17823e-05	0.00010571
	0.02755	0.00669	3.188e-05	0.000106034
	0.02764	0.00671	3.19781e-05	0.000106359
	0.02772	0.00673	3.20764e-05	0.000106686
	0.02781	0.00675	3.21751e-05	0.000107013
	0.02789	0.00677	3.2274e-05	0.000107342
	0.02798	0.00679	3.23733e-05	0.000107671
	0.02806	0.00681	3.24729e-05	0.000108001
	0.02815	0.00683	3.25727e-05	0.000108333
	0.02824	0.00685	3.26729e-05	0.000108665
	0.02832	0.00688	3.27734e-05	0.000108999
	0.02841	0.0069	3.28742e-05	0.000109333
	0.0285	0.00692	3.29753e-05	0.000109669
	0.02859	0.00694	3.30767e-05	0.000110005
	0.02867	0.00696	3.31784e-05	0.000110343
	0.02876	0.00698	3.32805e-05	0.000110681
	0.02885	0.007	3.33828e-05	0.000111021
	0.02894	0.00702	3.34855e-05	0.000111361
	0.02903	0.00704	3.35885e-05	0.000111703
	0.02912	0.00707	3.36917e-05	0.000112046
	0.02921	0.00709	3.37954e-05	0.00011239
	0.0293	0.00711	3.38993e-05	0.000112735
	0.02939	0.00713	3.40036e-05	0.00011308
	0.02948	0.00715	3.41081e-05	0.000113427
	0.02957	0.00717	3.4213e-05	0.000113775
	0.02966	0.0072	3.43182e-05	0.000114124
	0.02975	0.00722	3.44238e-05	0.000114475
	0.02984	0.00724	3.45297e-05	0.000114826
	0.02993	0.00726	3.46358e-05	0.000115178
	0.03003	0.00728	3.47424e-05	0.000115532
	0.03012	0.00731	3.48492e-05	0.000115886
	0.03021	0.00733	3.49564e-05	0.000116242
	0.0303	0.00735	3.50639e-05	0.000116598
	0.0304	0.00737	3.51717e-05	0.000116956
	0.03049	0.0074	3.52799e-05	0.000117315
	0.03058	0.00742	3.53884e-05	0.000117675
	0.03068	0.00744	3.54972e-05	0.000118036
	0.03077	0.00746	3.56064e-05	0.000118398
	0.03087	0.00749	3.57159e-05	0.000118761
	0.03096	0.00751	3.58257e-05	0.000119125
	0.03106	0.00753	3.59359e-05	0.000119491
	0.03115	0.00756	3.60464e-05	0.000119857
	0.03125	0.00758	3.61573e-05	0.000120225
	0.03134	0.0076	3.62685e-05	0.000120594
	0.03144	0.00762	3.638e-05	0.000120964
	0.03154	0.00765	3.64919e-05	0.000121335
	0.03163	0.00767	3.66041e-05	0.000121707
	0.03173	0.00769	3.67167e-05	0.00012208
	0.03183	0.00772	3.68296e-05	0.000122455
	0.03193	0.00774	3.69429e-05	0.000122831
	0.03203	0.00776	3.70565e-05	0.000123207
	0.03212	0.00779	3.71705e-05	0.000123585
	0.03222	0.00781	3.72848e-05	0.000123964
	0.03232	0.00784	3.73994e-05	0.000124345
	0.03242	0.00786	3.75144e-05	0.000124726
	0.03252	0.00788	3.76298e-05	0.000125109
	0.03262	0.00791	3.77455e-05	0.000125492
	0.03272	0.00793	3.78616e-05	0.000125877
	0.03282	0.00796	3.79781e-05	0.000126263
	0.03292	0.00798	3.80949e-05	0.000126651
	0.03302	0.008	3.8212e-05	0.000127039
	0.03313	0.00803	3.83295e-05	0.000127429
	0.03323	0.00805	3.84474e-05	0.00012782
	0.03333	0.00808	3.85656e-05	0.000128212
	0.03343	0.0081	3.86842e-05	0.000128605
	0.03354	0.00813	3.88032e-05	0.000128999
	0.03364	0.00815	3.89225e-05	0.000129395
	0.03374	0.00818	3.90422e-05	0.000129792
	0.03385	0.0082	3.91623e-05	0.00013019
	0.03395	0.00823	3.92827e-05	0.000130589
	0.03405	0.00825	3.94036e-05	0.00013099
	0.03416	0.00828	3.95247e-05	0.000131392
	0.03426	0.0083	3.96463e-05	0.000131795
	0.03437	0.00833	3.97682e-05	0.000132199
	0.03448	0.00835	3.98905e-05	0.000132604
	0.03458	0.00838	4.00132e-05	0.000133011
	0.03469	0.0084	4.01362e-05	0.000133419
	0.03479	0.00843	4.02597e-05	0.000133828
	0.0349	0.00845	4.03835e-05	0.000134238
	0.03501	0.00848	4.05077e-05	0.00013465
	0.03512	0.00851	4.06322e-05	0.000135063
	0.03522	0.00853	4.07572e-05	0.000135477
	0.03533	0.00856	4.08825e-05	0.000135893
	0.03544	0.00858	4.10083e-05	0.000136309
	0.03555	0.00861	4.11344e-05	0.000136727
	0.03566	0.00864	4.12609e-05	0.000137147
	0.03577	0.00866	4.13878e-05	0.000137567
	0.03588	0.00869	4.15151e-05	0.000137989
	0.03599	0.00871	4.16427e-05	0.000138412
	0.0361	0.00874	4.17708e-05	0.000138837
	0.03621	0.00877	4.18992e-05	0.000139262
	0.03632	0.00879	4.20281e-05	0.000139689
	0.03644	0.00882	4.21574e-05	0.000140118
	0.03655	0.00885	4.2287e-05	0.000140547
	0.03666	0.00887	4.2417e-05	0.000140978
	0.03677	0.0089	4.25475e-05	0.000141411
	0.03689	0.00893	4.26783e-05	0.000141844
	0.037	0.00896	4.28096e-05	0.000142279
	0.03711	0.00898	4.29412e-05	0.000142716
	0.03723	0.00901	4.30733e-05	0.000143153
	0.03734	0.00904	4.32057e-05	0.000143592
	0.03746	0.00906	4.33386e-05	0.000144032
	0.03757	0.00909	4.34719e-05	0.000144474
	0.03769	0.00912	4.36056e-05	0.000144917
	0.0378	0.00915	4.37397e-05	0.000145361
	0.03792	0.00918	4.38742e-05	0.000145807
	0.03804	0.0092	4.40091e-05	0.000146254
	0.03815	0.00923	4.41445e-05	0.000146702
	0.03827	0.00926	4.42802e-05	0.000147152
	0.03839	0.00929	4.44164e-05	0.000147603
	0.03851	0.00932	4.4553e-05	0.000148056
	0.03862	0.00934	4.469e-05	0.00014851
	0.03874	0.00937	4.48274e-05	0.000148965
	0.03886	0.0094	4.49653e-05	0.000149422
	0.03898	0.00943	4.51036e-05	0.00014988
	0.0391	0.00946	4.52423e-05	0.000150339
	0.03922	0.00949	4.53814e-05	0.0001508
	0.03934	0.00952	4.5521e-05	0.000151262
	0.03946	0.00954	4.56609e-05	0.000151726
	0.03959	0.00957	4.58014e-05	0.000152191
	0.03971	0.0096	4.59422e-05	0.000152658
	0.03983	0.00963	4.60835e-05	0.000153126
	0.03995	0.00966	4.62252e-05	0.000153595
	0.04007	0.00969	4.63674e-05	0.000154066
	0.0402	0.00972	4.651e-05	0.000154538
	0.04032	0.00975	4.6653e-05	0.000155012
	0.04045	0.00978	4.67965e-05	0.000155487
	0.04057	0.00981	4.69404e-05	0.000155964
	0.04069	0.00984	4.70847e-05	0.000156442
	0.04082	0.00987	4.72295e-05	0.000156921
	0.04095	0.0099	4.73748e-05	0.000157402
	0.04107	0.00993	4.75204e-05	0.000157885
	0.0412	0.00996	4.76666e-05	0.000158369
	0.04132	0.00999	4.78132e-05	0.000158854
	0.04145	0.01002	4.79602e-05	0.000159341
	0.04158	0.01005	4.81077e-05	0.00015983
	0.04171	0.01008	4.82556e-05	0.000160319
	0.04184	0.01011	4.8404e-05	0.000160811
	0.04196	0.01014	4.85529e-05	0.000161304
	0.04209	0.01017	4.87022e-05	0.000161798
	0.04222	0.0102	4.8852e-05	0.000162294
	0.04235	0.01023	4.90022e-05	0.000162791
	0.04248	0.01026	4.91529e-05	0.00016329
	0.04261	0.01029	4.9304e-05	0.000163791
	0.04274	0.01033	4.94557e-05	0.000164293
	0.04288	0.01036	4.96077e-05	0.000164796
	0.04301	0.01039	4.97603e-05	0.000165301
	0.04314	0.01042	4.99133e-05	0.000165808
	0.04327	0.01045	5.00668e-05	0.000166316
	0.04341	0.01048	5.02208e-05	0.000166826
	0.04354	0.01052	5.03752e-05	0.000167337
	0.04367	0.01055	5.05301e-05	0.00016785
	0.04381	0.01058	5.06855e-05	0.000168364
	0.04394	0.01061	5.08414e-05	0.00016888
	0.04408	0.01064	5.09977e-05	0.000169398
	0.04421	0.01068	5.11546e-05	0.000169917
	0.04435	0.01071	5.13119e-05	0.000170437
	0.04449	0.01074	5.14697e-05	0.00017096
	0.04462	0.01077	5.16279e-05	0.000171484
	0.04476	0.01081	5.17867e-05	0.000172009
	0.0449	0.01084	5.19459e-05	0.000172536
	0.04504	0.01087	5.21057e-05	0.000173065
	0.04517	0.0109	5.22659e-05	0.000173595
	0.04531	0.01094	5.24266e-05	0.000174127
	0.04545	0.01097	5.25879e-05	0.000174661
	0.04559	0.011	5.27496e-05	0.000175196
	0.04573	0.01104	5.29118e-05	0.000175732
	0.04587	0.01107	5.30745e-05	0.000176271
	0.04601	0.0111	5.32377e-05	0.000176811
	0.04616	0.01114	5.34014e-05	0.000177353
	0.0463	0.01117	5.35656e-05	0.000177896
	0.04644	0.01121	5.37304e-05	0.000178441
	0.04658	0.01124	5.38956e-05	0.000178988
	0.04673	0.01127	5.40613e-05	0.000179536
	0.04687	0.01131	5.42276e-05	0.000180086
	0.04701	0.01134	5.43943e-05	0.000180638
	0.04716	0.01138	5.45616e-05	0.000181191
	0.0473	0.01141	5.47294e-05	0.000181746
	0.04745	0.01144	5.48977e-05	0.000182303
	0.04759	0.01148	5.50665e-05	0.000182862
	0.04774	0.01151	5.52358e-05	0.000183422
	0.04789	0.01155	5.54057e-05	0.000183984
	0.04804	0.01158	5.55761e-05	0.000184547
	0.04818	0.01162	5.5747e-05	0.000185113
	0.04833	0.01165	5.59184e-05	0.00018568
	0.04848	0.01169	5.60904e-05	0.000186249
	0.04863	0.01172	5.62628e-05	0.000186819
	0.04878	0.01176	5.64359e-05	0.000187391
	0.04893	0.0118	5.66094e-05	0.000187965
	0.04908	0.01183	5.67835e-05	0.000188541
	0.04923	0.01187	5.69581e-05	0.000189119
	0.04938	0.0119	5.71333e-05	0.000189698
	0.04953	0.01194	5.73089e-05	0.000190279
	0.04969	0.01198	5.74852e-05	0.000190862
	0.04984	0.01201	5.76619e-05	0.000191446
	0.04999	0.01205	5.78393e-05	0.000192033
	0.05015	0.01208	5.80171e-05	0.000192621
	0.0503	0.01212	5.81955e-05	0.000193211
	0.05045	0.01216	5.83745e-05	0.000193803
	0.05061	0.01219	5.8554e-05	0.000194396
	0.05077	0.01223	5.8734e-05	0.000194992
	0.05092	0.01227	5.89147e-05	0.000195589
	0.05108	0.01231	5.90958e-05	0.000196188
	0.05124	0.01234	5.92775e-05	0.000196789
	0.05139	0.01238	5.94598e-05	0.000197391
	0.05155	0.01242	5.96427e-05	0.000197996
	0.05171	0.01245	5.98261e-05	0.000198602
	0.05187	0.01249	6.001e-05	0.00019921
	0.05203	0.01253	6.01946e-05	0.00019982
	0.05219	0.01257	6.03797e-05	0.000200432
	0.05235	0.01261	6.05654e-05	0.000201046
	0.05251	0.01264	6.07516e-05	0.000201662
	0.05267	0.01268	6.09384e-05	0.000202279
	0.05283	0.01272	6.11258e-05	0.000202899
	0.053	0.01276	6.13138e-05	0.00020352
	0.05316	0.0128	6.15023e-05	0.000204143
	0.05332	0.01284	6.16914e-05	0.000204768
	0.05349	0.01288	6.18811e-05	0.000205395
	0.05365	0.01291	6.20714e-05	0.000206024
	0.05382	0.01295	6.22623e-05	0.000206655
	0.05398	0.01299	6.24537e-05	0.000207288
	0.05415	0.01303	6.26458e-05	0.000207922
	0.05431	0.01307	6.28384e-05	0.000208559
	0.05448	0.01311	6.30317e-05	0.000209198
	0.05465	0.01315	6.32255e-05	0.000209838
	0.05482	0.01319	6.34199e-05	0.000210481
	0.05499	0.01323	6.36149e-05	0.000211125
	0.05515	0.01327	6.38105e-05	0.000211771
	0.05532	0.01331	6.40067e-05	0.00021242
	0.05549	0.01335	6.42036e-05	0.00021307
	0.05566	0.01339	6.4401e-05	0.000213722
	0.05584	0.01343	6.4599e-05	0.000214377
	0.05601	0.01347	6.47977e-05	0.000215033
	0.05618	0.01351	6.49969e-05	0.000215691
	0.05635	0.01355	6.51968e-05	0.000216351
	0.05653	0.01359	6.53973e-05	0.000217014
	0.0567	0.01363	6.55984e-05	0.000217678
	0.05687	0.01368	6.58001e-05	0.000218344
	0.05705	0.01372	6.60024e-05	0.000219013
	0.05723	0.01376	6.62054e-05	0.000219683
	0.0574	0.0138	6.64089e-05	0.000220356
	0.05758	0.01384	6.66131e-05	0.00022103
	0.05775	0.01388	6.6818e-05	0.000221707
	0.05793	0.01392	6.70234e-05	0.000222385
	0.05811	0.01397	6.72295e-05	0.000223066
	0.05829	0.01401	6.74363e-05	0.000223749
	0.05847	0.01405	6.76436e-05	0.000224433
	0.05865	0.01409	6.78516e-05	0.00022512
	0.05883	0.01414	6.80603e-05	0.000225809
	0.05901	0.01418	6.82695e-05	0.000226501
	0.05919	0.01422	6.84795e-05	0.000227194
	0.05937	0.01426	6.869e-05	0.000227889
	0.05956	0.01431	6.89013e-05	0.000228586
	0.05974	0.01435	6.91131e-05	0.000229286
	0.05992	0.01439	6.93256e-05	0.000229988
	0.06011	0.01444	6.95388e-05	0.000230692
	0.06029	0.01448	6.97526e-05	0.000231398
	0.06048	0.01452	6.99671e-05	0.000232106
	0.06066	0.01457	7.01823e-05	0.000232816
	0.06085	0.01461	7.03981e-05	0.000233528
	0.06104	0.01466	7.06145e-05	0.000234243
	0.06123	0.0147	7.08317e-05	0.00023496
	0.06141	0.01474	7.10495e-05	0.000235679
	0.0616	0.01479	7.12679e-05	0.0002364
	0.06179	0.01483	7.14871e-05	0.000237123
	0.06198	0.01488	7.17069e-05	0.000237849
	0.06217	0.01492	7.19274e-05	0.000238576
	0.06236	0.01497	7.21486e-05	0.000239306
	0.06256	0.01501	7.23704e-05	0.000240039
	0.06275	0.01506	7.25929e-05	0.000240773
	0.06294	0.0151	7.28161e-05	0.00024151
	0.06313	0.01515	7.304e-05	0.000242249
	0.06333	0.01519	7.32646e-05	0.00024299
	0.06352	0.01524	7.34899e-05	0.000243733
	0.06372	0.01529	7.37159e-05	0.000244479
	0.06391	0.01533	7.39426e-05	0.000245227
	0.06411	0.01538	7.41699e-05	0.000245977
	0.06431	0.01542	7.4398e-05	0.000246729
	0.06451	0.01547	7.46267e-05	0.000247484
	0.0647	0.01552	7.48562e-05	0.000248241
	0.0649	0.01556	7.50864e-05	0.000249001
	0.0651	0.01561	7.53173e-05	0.000249762
	0.0653	0.01566	7.55489e-05	0.000250526
	0.0655	0.01571	7.57812e-05	0.000251293
	0.06571	0.01575	7.60142e-05	0.000252061
	0.06591	0.0158	7.62479e-05	0.000252832
	0.06611	0.01585	7.64823e-05	0.000253606
	0.06631	0.0159	7.67175e-05	0.000254381
	0.06652	0.01594	7.69534e-05	0.000255159
	0.06672	0.01599	7.719e-05	0.00025594
	0.06693	0.01604	7.74274e-05	0.000256723
	0.06713	0.01609	7.76654e-05	0.000257508
	0.06734	0.01614	7.79043e-05	0.000258295
	0.06755	0.01618	7.81438e-05	0.000259085
	0.06776	0.01623	7.83841e-05	0.000259878
	0.06796	0.01628	7.86251e-05	0.000260673
	0.06817	0.01633	7.88668e-05	0.00026147
	0.06838	0.01638	7.91093e-05	0.000262269
	0.06859	0.01643	7.93526e-05	0.000263071
	0.0688	0.01648	7.95966e-05	0.000263876
	0.06902	0.01653	7.98413e-05	0.000264683
	0.06923	0.01658	8.00868e-05	0.000265492
	0.06944	0.01663	8.03331e-05	0.000266304
	0.06965	0.01668	8.05801e-05	0.000267118
	0.06987	0.01673	8.08278e-05	0.000267935
	0.07008	0.01678	8.10764e-05	0.000268754
	0.0703	0.01683	8.13257e-05	0.000269576
	0.07052	0.01688	8.15757e-05	0.0002704
	0.07073	0.01693	8.18265e-05	0.000271227
	0.07095	0.01698	8.20781e-05	0.000272056
	0.07117	0.01703	8.23305e-05	0.000272888
	0.07139	0.01708	8.25837e-05	0.000273723
	0.07161	0.01713	8.28376e-05	0.000274559
	0.07183	0.01719	8.30923e-05	0.000275399
	0.07205	0.01724	8.33478e-05	0.000276241
	0.07227	0.01729	8.3604e-05	0.000277085
	0.07249	0.01734	8.38611e-05	0.000277932
	0.07271	0.01739	8.4119e-05	0.000278782
	0.07294	0.01744	8.43776e-05	0.000279634
	0.07316	0.0175	8.4637e-05	0.000280489
	0.07339	0.01755	8.48973e-05	0.000281346
	0.07361	0.0176	8.51583e-05	0.000282206
	0.07384	0.01766	8.54201e-05	0.000283069
	0.07407	0.01771	8.56828e-05	0.000283934
	0.07429	0.01776	8.59462e-05	0.000284802
	0.07452	0.01781	8.62105e-05	0.000285673
	0.07475	0.01787	8.64756e-05	0.000286546
	0.07498	0.01792	8.67414e-05	0.000287422
	0.07521	0.01798	8.70082e-05	0.0002883
	0.07544	0.01803	8.72757e-05	0.000289181
	0.07568	0.01808	8.7544e-05	0.000290065
	0.07591	0.01814	8.78132e-05	0.000290952
	0.07614	0.01819	8.80832e-05	0.000291841
	0.07638	0.01825	8.8354e-05	0.000292733
	0.07661	0.0183	8.86257e-05	0.000293627
	0.07685	0.01836	8.88982e-05	0.000294525
	0.07708	0.01841	8.91715e-05	0.000295425
	0.07732	0.01847	8.94457e-05	0.000296327
	0.07756	0.01852	8.97207e-05	0.000297233
	0.0778	0.01858	8.99965e-05	0.000298141
	0.07804	0.01863	9.02733e-05	0.000299052
	0.07828	0.01869	9.05508e-05	0.000299966
	0.07852	0.01874	9.08292e-05	0.000300882
	0.07876	0.0188	9.11085e-05	0.000301802
	0.079	0.01886	9.13886e-05	0.000302724
	0.07924	0.01891	9.16696e-05	0.000303649
	0.07949	0.01897	9.19514e-05	0.000304577
	0.07973	0.01903	9.22342e-05	0.000305507
	0.07998	0.01908	9.25177e-05	0.000306441
	0.08022	0.01914	9.28022e-05	0.000307377
	0.08047	0.0192	9.30875e-05	0.000308316
	0.08072	0.01926	9.33737e-05	0.000309258
	0.08097	0.01931	9.36608e-05	0.000310202
	0.08122	0.01937	9.39488e-05	0.00031115
	0.08146	0.01943	9.42377e-05	0.000312101
	0.08172	0.01949	9.45274e-05	0.000313054
	0.08197	0.01955	9.4818e-05	0.00031401
	0.08222	0.0196	9.51096e-05	0.000314969
	0.08247	0.01966	9.5402e-05	0.000315931
	0.08273	0.01972	9.56953e-05	0.000316896
	0.08298	0.01978	9.59895e-05	0.000317864
	0.08324	0.01984	9.62846e-05	0.000318835
	0.08349	0.0199	9.65807e-05	0.000319809
	0.08375	0.01996	9.68776e-05	0.000320786
	0.08401	0.02002	9.71755e-05	0.000321765
	0.08426	0.02008	9.74742e-05	0.000322748
	0.08452	0.02014	9.77739e-05	0.000323734
	0.08478	0.0202	9.80745e-05	0.000324723
	0.08504	0.02026	9.83761e-05	0.000325714
	0.08531	0.02032	9.86785e-05	0.000326709
	0.08557	0.02038	9.89819e-05	0.000327707
	0.08583	0.02044	9.92863e-05	0.000328707
	0.0861	0.0205	9.95915e-05	0.000329711
	0.08636	0.02056	9.98977e-05	0.000330718
	0.08663	0.02063	0.000100205	0.000331728
	0.08689	0.02069	0.000100513	0.00033274
	0.08716	0.02075	0.000100822	0.000333756
	0.08743	0.02081	0.000101132	0.000334775
	0.0877	0.02087	0.000101443	0.000335798
	0.08797	0.02094	0.000101755	0.000336823
	0.08824	0.021	0.000102068	0.000337851
	0.08851	0.02106	0.000102381	0.000338883
	0.08878	0.02112	0.000102696	0.000339917
	0.08905	0.02119	0.000103012	0.000340955
	0.08933	0.02125	0.000103329	0.000341996
	0.0896	0.02131	0.000103646	0.00034304
	0.08988	0.02138	0.000103965	0.000344087
	0.09015	0.02144	0.000104285	0.000345137
	0.09043	0.0215	0.000104605	0.000346191
	0.09071	0.02157	0.000104927	0.000347247
	0.09099	0.02163	0.000105249	0.000348307
	0.09127	0.0217	0.000105573	0.00034937
	0.09155	0.02176	0.000105898	0.000350437
	0.09183	0.02183	0.000106223	0.000351506
	0.09211	0.02189	0.00010655	0.000352579
	0.0924	0.02196	0.000106877	0.000353655
	0.09268	0.02202	0.000107206	0.000354735
	0.09297	0.02209	0.000107535	0.000355817
	0.09325	0.02215	0.000107866	0.000356903
	0.09354	0.02222	0.000108198	0.000357992
	0.09383	0.02229	0.00010853	0.000359085
	0.09411	0.02235	0.000108864	0.00036018
	0.0944	0.02242	0.000109199	0.000361279
	0.09469	0.02249	0.000109534	0.000362382
	0.09499	0.02255	0.000109871	0.000363488
	0.09528	0.02262	0.000110209	0.000364597
	0.09557	0.02269	0.000110548	0.000365709
	0.09587	0.02276	0.000110888	0.000366825
	0.09616	0.02282	0.000111229	0.000367944
	0.09646	0.02289	0.000111571	0.000369067
	0.09675	0.02296	0.000111914	0.000370193
	0.09705	0.02303	0.000112258	0.000371322
	0.09735	0.0231	0.000112603	0.000372455
	0.09765	0.02317	0.000112949	0.000373591
	0.09795	0.02323	0.000113296	0.000374731
	0.09825	0.0233	0.000113644	0.000375874
	0.09855	0.02337	0.000113994	0.00037702
	0.09885	0.02344	0.000114344	0.00037817
	0.09916	0.02351	0.000114696	0.000379324
	0.09946	0.02358	0.000115048	0.000380481
	0.09977	0.02365	0.000115402	0.000381641
	0.10008	0.02372	0.000115757	0.000382805
	0.10038	0.02379	0.000116113	0.000383973
	0.10069	0.02386	0.00011647	0.000385144
	0.101	0.02394	0.000116828	0.000386319
	0.10131	0.02401	0.000117187	0.000387497
	0.10163	0.02408	0.000117547	0.000388678
	0.10194	0.02415	0.000117909	0.000389864
	0.10225	0.02422	0.000118271	0.000391053
	0.10257	0.02429	0.000118635	0.000392245
	0.10288	0.02437	0.000118999	0.000393441
	0.1032	0.02444	0.000119365	0.000394641
	0.10352	0.02451	0.000119732	0.000395844
	0.10383	0.02458	0.0001201	0.000397051
	0.10415	0.02466	0.000120469	0.000398262
	0.10447	0.02473	0.00012084	0.000399476
	0.10479	0.0248	0.000121211	0.000400694
	0.10512	0.02488	0.000121584	0.000401915
	0.10544	0.02495	0.000121958	0.000403141
	0.10576	0.02503	0.000122333	0.00040437
	0.10609	0.0251	0.000122709	0.000405602
	0.10642	0.02517	0.000123086	0.000406839
	0.10674	0.02525	0.000123464	0.000408079
	0.10707	0.02532	0.000123844	0.000409323
	0.1074	0.0254	0.000124225	0.000410571
	0.10773	0.02547	0.000124607	0.000411822
	0.10806	0.02555	0.00012499	0.000413077
	0.1084	0.02563	0.000125374	0.000414336
	0.10873	0.0257	0.000125759	0.000415599
	0.10906	0.02578	0.000126146	0.000416866
	0.1094	0.02585	0.000126534	0.000418136
	0.10974	0.02593	0.000126923	0.00041941
	0.11007	0.02601	0.000127313	0.000420688
	0.11041	0.02608	0.000127704	0.00042197
	0.11075	0.02616	0.000128097	0.000423256
	0.11109	0.02624	0.000128491	0.000424546
	0.11143	0.02632	0.000128886	0.00042584
	0.11178	0.0264	0.000129282	0.000427137
	0.11212	0.02647	0.000129679	0.000428439
	0.11246	0.02655	0.000130078	0.000429744
	0.11281	0.02663	0.000130478	0.000431053
	0.11316	0.02671	0.000130879	0.000432367
	0.11351	0.02679	0.000131281	0.000433684
	0.11386	0.02687	0.000131685	0.000435005
	0.11421	0.02695	0.00013209	0.00043633
	0.11456	0.02703	0.000132496	0.000437659
	0.11491	0.02711	0.000132903	0.000438993
	0.11526	0.02719	0.000133311	0.00044033
	0.11562	0.02727	0.000133721	0.000441671
	0.11597	0.02735	0.000134132	0.000443016
	0.11633	0.02743	0.000134545	0.000444366
	0.11669	0.02751	0.000134958	0.000445719
	0.11705	0.02759	0.000135373	0.000447077
	0.11741	0.02767	0.000135789	0.000448438
	0.11777	0.02776	0.000136207	0.000449804
	0.11813	0.02784	0.000136625	0.000451174
	0.11849	0.02792	0.000137045	0.000452548
	0.11886	0.028	0.000137467	0.000453926
	0.11922	0.02809	0.000137889	0.000455308
	0.11959	0.02817	0.000138313	0.000456695
	0.11996	0.02825	0.000138738	0.000458085
	0.12033	0.02834	0.000139165	0.00045948
	0.1207	0.02842	0.000139593	0.000460879
	0.12107	0.0285	0.000140022	0.000462282
	0.12144	0.02859	0.000140452	0.00046369
	0.12181	0.02867	0.000140884	0.000465101
	0.12219	0.02876	0.000141317	0.000466517
	0.12256	0.02884	0.000141751	0.000467937
	0.12294	0.02893	0.000142187	0.000469362
	0.12332	0.02901	0.000142624	0.000470791
	0.1237	0.0291	0.000143062	0.000472224
	0.12408	0.02918	0.000143502	0.000473661
	0.12446	0.02927	0.000143943	0.000475103
	0.12484	0.02936	0.000144386	0.000476549
	0.12523	0.02944	0.00014483	0.000477999
	0.12561	0.02953	0.000145275	0.000479454
	0.126	0.02962	0.000145721	0.000480913
	0.12639	0.0297	0.000146169	0.000482377
	0.12678	0.02979	0.000146619	0.000483845
	0.12717	0.02988	0.000147069	0.000485317
	0.12756	0.02997	0.000147521	0.000486794
	0.12795	0.03006	0.000147975	0.000488275
	0.12834	0.03015	0.00014843	0.000489761
	0.12874	0.03023	0.000148886	0.000491251
	0.12913	0.03032	0.000149344	0.000492746
	0.12953	0.03041	0.000149803	0.000494245
	0.12993	0.0305	0.000150263	0.000495748
	0.13033	0.03059	0.000150725	0.000497257
	0.13073	0.03068	0.000151188	0.000498769
	0.13113	0.03077	0.000151653	0.000500287
	0.13153	0.03086	0.000152119	0.000501809
	0.13194	0.03095	0.000152587	0.000503335
	0.13234	0.03104	0.000153056	0.000504866
	0.13275	0.03114	0.000153526	0.000506402
	0.13316	0.03123	0.000153998	0.000507942
	0.13357	0.03132	0.000154472	0.000509487
	0.13398	0.03141	0.000154946	0.000511036
	0.13439	0.0315	0.000155423	0.00051259
	0.13481	0.0316	0.0001559	0.000514149
	0.13522	0.03169	0.00015638	0.000515713
	0.13564	0.03178	0.00015686	0.000517281
	0.13605	0.03188	0.000157342	0.000518854
	0.13647	0.03197	0.000157826	0.000520432
	0.13689	0.03206	0.000158311	0.000522014
	0.13731	0.03216	0.000158798	0.000523601
	0.13774	0.03225	0.000159286	0.000525193
	0.13816	0.03235	0.000159775	0.00052679
	0.13858	0.03244	0.000160267	0.000528391
	0.13901	0.03254	0.000160759	0.000529998
	0.13944	0.03263	0.000161253	0.000531609
	0.13987	0.03273	0.000161749	0.000533225
	0.1403	0.03283	0.000162246	0.000534846
	0.14073	0.03292	0.000162745	0.000536472
	0.14116	0.03302	0.000163245	0.000538102
	0.1416	0.03312	0.000163747	0.000539738
	0.14203	0.03321	0.00016425	0.000541378
	0.14247	0.03331	0.000164755	0.000543023
	0.14291	0.03341	0.000165261	0.000544674
	0.14335	0.03351	0.000165769	0.000546329
	0.14379	0.0336	0.000166279	0.000547989
	0.14423	0.0337	0.00016679	0.000549654
	0.14467	0.0338	0.000167303	0.000551325
	0.14512	0.0339	0.000167817	0.000553
	0.14556	0.034	0.000168333	0.00055468
	0.14601	0.0341	0.00016885	0.000556365
	0.14646	0.0342	0.000169369	0.000558056
	0.14691	0.0343	0.000169889	0.000559751
	0.14736	0.0344	0.000170412	0.000561451
	0.14782	0.0345	0.000170935	0.000563157
	0.14827	0.0346	0.000171461	0.000564868
	0.14873	0.0347	0.000171988	0.000566584
	0.14918	0.03481	0.000172516	0.000568305
	0.14964	0.03491	0.000173047	0.000570031
	0.1501	0.03501	0.000173579	0.000571762
	0.15057	0.03511	0.000174112	0.000573499
	0.15103	0.03521	0.000174647	0.00057524
	0.15149	0.03532	0.000175184	0.000576987
	0.15196	0.03542	0.000175722	0.000578739
	0.15243	0.03552	0.000176262	0.000580497
	0.1529	0.03563	0.000176804	0.000582259
	0.15337	0.03573	0.000177348	0.000584027
	0.15384	0.03584	0.000177893	0.000585801
	0.15431	0.03594	0.000178439	0.000587579
	0.15479	0.03605	0.000178988	0.000589363
	0.15526	0.03615	0.000179538	0.000591152
	0.15574	0.03626	0.00018009	0.000592947
	0.15622	0.03636	0.000180643	0.000594747
	0.1567	0.03647	0.000181198	0.000596552
	0.15718	0.03658	0.000181755	0.000598363
	0.15766	0.03668	0.000182314	0.00060018
	0.15815	0.03679	0.000182874	0.000602001
	0.15864	0.0369	0.000183436	0.000603828
	0.15912	0.03701	0.000184	0.000605661
	0.15961	0.03711	0.000184566	0.000607499
	0.1601	0.03722	0.000185133	0.000609343
	0.1606	0.03733	0.000185702	0.000611192
	0.16109	0.03744	0.000186273	0.000613046
	0.16159	0.03755	0.000186845	0.000614906
	0.16208	0.03766	0.000187419	0.000616772
	0.16258	0.03777	0.000187995	0.000618643
	0.16308	0.03788	0.000188573	0.00062052
	0.16358	0.03799	0.000189153	0.000622403
	0.16409	0.0381	0.000189734	0.000624291
	0.16459	0.03821	0.000190317	0.000626185
	0.1651	0.03832	0.000190902	0.000628084
	0.1656	0.03843	0.000191489	0.00062999
	0.16611	0.03855	0.000192077	0.0006319
	0.16663	0.03866	0.000192667	0.000633817
	0.16714	0.03877	0.00019326	0.000635739
	0.16765	0.03888	0.000193853	0.000637667
	0.16817	0.039	0.000194449	0.000639601
	0.16868	0.03911	0.000195047	0.000641541
	0.1692	0.03922	0.000195646	0.000643486
	0.16972	0.03934	0.000196247	0.000645437
	0.17025	0.03945	0.000196851	0.000647394
	0.17077	0.03957	0.000197456	0.000649357
	0.17129	0.03968	0.000198062	0.000651326
	0.17182	0.0398	0.000198671	0.000653301
	0.17235	0.03991	0.000199282	0.000655281
	0.17288	0.04003	0.000199894	0.000657268
	0.17341	0.04015	0.000200508	0.00065926
	0.17395	0.04026	0.000201125	0.000661259
	0.17448	0.04038	0.000201743	0.000663263
	0.17502	0.0405	0.000202363	0.000665273
	0.17556	0.04061	0.000202984	0.000667289
	0.1761	0.04073	0.000203608	0.000669312
	0.17664	0.04085	0.000204234	0.00067134
	0.17718	0.04097	0.000204862	0.000673374
	0.17773	0.04109	0.000205491	0.000675415
	0.17827	0.04121	0.000206123	0.000677462
	0.17882	0.04133	0.000206756	0.000679514
	0.17937	0.04145	0.000207392	0.000681573
	0.17992	0.04157	0.000208029	0.000683638
	0.18048	0.04169	0.000208668	0.000685709
	0.18103	0.04181	0.000209309	0.000687786
	0.18159	0.04193	0.000209953	0.00068987
	0.18215	0.04205	0.000210598	0.00069196
	0.18271	0.04217	0.000211245	0.000694055
	0.18327	0.04229	0.000211894	0.000696158
	0.18383	0.04242	0.000212545	0.000698266
	0.1844	0.04254	0.000213198	0.000700381
	0.18496	0.04266	0.000213854	0.000702502
	0.18553	0.04279	0.000214511	0.000704629
	0.1861	0.04291	0.00021517	0.000706763
	0.18668	0.04303	0.000215831	0.000708903
	0.18725	0.04316	0.000216494	0.000711049
	0.18783	0.04328	0.00021716	0.000713202
	0.1884	0.04341	0.000217827	0.000715361
	0.18898	0.04353	0.000218496	0.000717527
	0.18957	0.04366	0.000219168	0.000719699
	0.19015	0.04379	0.000219841	0.000721878
	0.19073	0.04391	0.000220517	0.000724063
	0.19132	0.04404	0.000221194	0.000726255
	0.19191	0.04417	0.000221874	0.000728453
	0.1925	0.04429	0.000222556	0.000730657
	0.19309	0.04442	0.00022324	0.000732869
	0.19368	0.04455	0.000223926	0.000735086
	0.19428	0.04468	0.000224614	0.000737311
	0.19488	0.04481	0.000225304	0.000739542
	0.19548	0.04494	0.000225996	0.000741779
	0.19608	0.04507	0.000226691	0.000744024
	0.19668	0.0452	0.000227387	0.000746275
	0.19729	0.04533	0.000228086	0.000748532
	0.19789	0.04546	0.000228787	0.000750797
	0.1985	0.04559	0.00022949	0.000753068
	0.19911	0.04572	0.000230195	0.000755346
	0.19973	0.04585	0.000230902	0.000757631
	0.20034	0.04598	0.000231612	0.000759922
	0.20096	0.04612	0.000232324	0.00076222
	0.20157	0.04625	0.000233038	0.000764525
	0.20219	0.04638	0.000233754	0.000766837
	0.20282	0.04652	0.000234472	0.000769156
	0.20344	0.04665	0.000235192	0.000771482
	0.20407	0.04678	0.000235915	0.000773815
	0.20469	0.04692	0.00023664	0.000776154
	0.20532	0.04705	0.000237367	0.000778501
	0.20595	0.04719	0.000238096	0.000780854
	0.20659	0.04732	0.000238828	0.000783215
	0.20722	0.04746	0.000239562	0.000785582
	0.20786	0.0476	0.000240298	0.000787957
	0.2085	0.04773	0.000241036	0.000790338
	0.20914	0.04787	0.000241777	0.000792727
	0.20978	0.04801	0.00024252	0.000795123
	0.21043	0.04815	0.000243265	0.000797525
	0.21108	0.04828	0.000244012	0.000799935
	0.21173	0.04842	0.000244762	0.000802353
	0.21238	0.04856	0.000245514	0.000804777
	0.21303	0.0487	0.000246268	0.000807208
	0.21369	0.04884	0.000247025	0.000809647
	0.21434	0.04898	0.000247784	0.000812093
	0.215	0.04912	0.000248545	0.000814546
	0.21566	0.04926	0.000249309	0.000817007
	0.21633	0.0494	0.000250075	0.000819474
	0.21699	0.04954	0.000250843	0.00082195
	0.21766	0.04969	0.000251614	0.000824432
	0.21833	0.04983	0.000252387	0.000826922
	0.219	0.04997	0.000253163	0.000829419
	0.21967	0.05011	0.000253941	0.000831923
	0.22035	0.05026	0.000254721	0.000834435
	0.22103	0.0504	0.000255503	0.000836955
	0.22171	0.05055	0.000256288	0.000839482
	0.22239	0.05069	0.000257076	0.000842016
	0.22307	0.05084	0.000257866	0.000844558
	0.22376	0.05098	0.000258658	0.000847107
	0.22445	0.05113	0.000259453	0.000849664
	0.22514	0.05127	0.00026025	0.000852229
	0.22583	0.05142	0.000261049	0.000854801
	0.22653	0.05157	0.000261851	0.000857381
	0.22722	0.05171	0.000262656	0.000859968
	0.22792	0.05186	0.000263463	0.000862563
	0.22862	0.05201	0.000264272	0.000865166
	0.22933	0.05216	0.000265084	0.000867776
	0.23003	0.05231	0.000265899	0.000870394
	0.23074	0.05246	0.000266716	0.00087302
	0.23145	0.05261	0.000267535	0.000875654
	0.23216	0.05276	0.000268357	0.000878295
	0.23287	0.05291	0.000269181	0.000880945
	0.23359	0.05306	0.000270008	0.000883602
	0.23431	0.05321	0.000270838	0.000886267
	0.23503	0.05336	0.00027167	0.000888939
	0.23575	0.05351	0.000272505	0.00089162
	0.23648	0.05366	0.000273342	0.000894309
	0.23721	0.05382	0.000274181	0.000897005
	0.23794	0.05397	0.000275024	0.00089971
	0.23867	0.05412	0.000275869	0.000902422
	0.2394	0.05428	0.000276716	0.000905143
	0.24014	0.05443	0.000277566	0.000907872
	0.24088	0.05459	0.000278419	0.000910608
	0.24162	0.05474	0.000279274	0.000913353
	0.24236	0.0549	0.000280132	0.000916106
	0.24311	0.05505	0.000280993	0.000918867
	0.24385	0.05521	0.000281856	0.000921636
	0.2446	0.05537	0.000282722	0.000924413
	0.24536	0.05552	0.000283591	0.000927199
	0.24611	0.05568	0.000284462	0.000929992
	0.24687	0.05584	0.000285336	0.000932794
	0.24763	0.056	0.000286212	0.000935604
	0.24839	0.05616	0.000287091	0.000938423
	0.24915	0.05632	0.000287973	0.00094125
	0.24992	0.05648	0.000288858	0.000944085
	0.25069	0.05664	0.000289745	0.000946928
	0.25146	0.0568	0.000290636	0.00094978
	0.25223	0.05696	0.000291528	0.00095264
	0.25301	0.05712	0.000292424	0.000955509
	0.25379	0.05728	0.000293322	0.000958386
	0.25457	0.05744	0.000294223	0.000961272
	0.25535	0.05761	0.000295127	0.000964166
	0.25614	0.05777	0.000296034	0.000967069
	0.25692	0.05793	0.000296943	0.00096998
	0.25771	0.0581	0.000297855	0.000972899
	0.25851	0.05826	0.00029877	0.000975828
	0.2593	0.05843	0.000299688	0.000978765
	0.2601	0.05859	0.000300609	0.00098171
	0.2609	0.05876	0.000301532	0.000984665
	0.2617	0.05892	0.000302458	0.000987628
	0.26251	0.05909	0.000303387	0.000990599
	0.26331	0.05926	0.000304319	0.00099358
	0.26412	0.05942	0.000305254	0.000996569
	0.26494	0.05959	0.000306192	0.000999567
	0.26575	0.05976	0.000307132	0.001
	0.26657	0.05993	0.000308076	0.00101
	0.26739	0.0601	0.000309022	0.00101
	0.26821	0.06027	0.000309971	0.00101
	0.26904	0.06044	0.000310923	0.00101
	0.26986	0.06061	0.000311878	0.00102
	0.27069	0.06078	0.000312836	0.00102
	0.27153	0.06095	0.000313797	0.00102
	0.27236	0.06112	0.000314761	0.00103
	0.2732	0.06129	0.000315728	0.00103
	0.27404	0.06147	0.000316698	0.00103
	0.27488	0.06164	0.000317671	0.00104
	0.27573	0.06181	0.000318646	0.00104
	0.27658	0.06199	0.000319625	0.00104
	0.27743	0.06216	0.000320607	0.00105
	0.27828	0.06234	0.000321592	0.00105
	0.27914	0.06251	0.000322579	0.00105
	0.27999	0.06269	0.00032357	0.00106
	0.28086	0.06286	0.000324564	0.00106
	0.28172	0.06304	0.000325561	0.00106
	0.28259	0.06322	0.000326561	0.00106
	0.28346	0.06339	0.000327564	0.00107
	0.28433	0.06357	0.00032857	0.00107
	0.2852	0.06375	0.000329579	0.00107
	0.28608	0.06393	0.000330591	0.00108
	0.28696	0.06411	0.000331607	0.00108
	0.28784	0.06429	0.000332625	0.00108
	0.28873	0.06447	0.000333647	0.00109
	0.28961	0.06465	0.000334672	0.00109
	0.29051	0.06483	0.0003357	0.00109
	0.2914	0.06501	0.000336731	0.0011
	0.2923	0.06519	0.000337765	0.0011
	0.29319	0.06537	0.000338802	0.0011
	0.2941	0.06556	0.000339843	0.00111
	0.295	0.06574	0.000340887	0.00111
	0.29591	0.06592	0.000341934	0.00111
	0.29682	0.06611	0.000342984	0.00112
	0.29773	0.06629	0.000344037	0.00112
	0.29865	0.06648	0.000345094	0.00112
	0.29957	0.06666	0.000346154	0.00113
	0.30049	0.06685	0.000347217	0.00113
	0.30141	0.06704	0.000348283	0.00113
	0.30234	0.06722	0.000349353	0.00114
	0.30327	0.06741	0.000350426	0.00114
	0.3042	0.0676	0.000351502	0.00114
	0.30514	0.06779	0.000352581	0.00115
	0.30608	0.06798	0.000353664	0.00115
	0.30702	0.06817	0.00035475	0.00115
	0.30796	0.06836	0.00035584	0.00116
	0.30891	0.06855	0.000356933	0.00116
	0.30986	0.06874	0.000358029	0.00116
	0.31081	0.06893	0.000359128	0.00117
	0.31177	0.06912	0.000360231	0.00117
	0.31273	0.06931	0.000361337	0.00118
	0.31369	0.06951	0.000362447	0.00118
	0.31465	0.0697	0.00036356	0.00118
	0.31562	0.06989	0.000364677	0.00119
	0.31659	0.07009	0.000365796	0.00119
	0.31757	0.07028	0.00036692	0.00119
	0.31854	0.07048	0.000368047	0.0012
	0.31952	0.07067	0.000369177	0.0012
	0.32051	0.07087	0.000370311	0.0012
	0.32149	0.07107	0.000371448	0.00121
	0.32248	0.07126	0.000372588	0.00121
	0.32347	0.07146	0.000373733	0.00121
	0.32447	0.07166	0.00037488	0.00122
	0.32546	0.07186	0.000376031	0.00122
	0.32647	0.07206	0.000377186	0.00123
	0.32747	0.07226	0.000378344	0.00123
	0.32848	0.07246	0.000379506	0.00123
	0.32949	0.07266	0.000380672	0.00124
	0.3305	0.07286	0.00038184	0.00124
	0.33152	0.07306	0.000383013	0.00124
	0.33254	0.07326	0.000384189	0.00125
	0.33356	0.07346	0.000385369	0.00125
	0.33459	0.07367	0.000386552	0.00126
	0.33562	0.07387	0.000387739	0.00126
	0.33665	0.07407	0.00038893	0.00126
	0.33768	0.07428	0.000390124	0.00127
	0.33872	0.07448	0.000391322	0.00127
	0.33976	0.07469	0.000392524	0.00127
	0.34081	0.0749	0.000393729	0.00128
	0.34186	0.0751	0.000394938	0.00128
	0.34291	0.07531	0.00039615	0.00129
	0.34396	0.07552	0.000397367	0.00129
	0.34502	0.07572	0.000398587	0.00129
	0.34608	0.07593	0.000399811	0.0013
	0.34715	0.07614	0.000401038	0.0013
	0.34821	0.07635	0.00040227	0.0013
	0.34929	0.07656	0.000403505	0.00131
	0.35036	0.07677	0.000404744	0.00131
	0.35144	0.07698	0.000405987	0.00132
	0.35252	0.07719	0.000407233	0.00132
	0.3536	0.07741	0.000408484	0.00132
	0.35469	0.07762	0.000409738	0.00133
	0.35578	0.07783	0.000410996	0.00133
	0.35688	0.07805	0.000412258	0.00134
	0.35797	0.07826	0.000413523	0.00134
	0.35907	0.07847	0.000414793	0.00134
	0.36018	0.07869	0.000416067	0.00135
	0.36129	0.07891	0.000417344	0.00135
	0.3624	0.07912	0.000418625	0.00136
	0.36351	0.07934	0.000419911	0.00136
	0.36463	0.07956	0.0004212	0.00136
	0.36575	0.07977	0.000422493	0.00137
	0.36688	0.07999	0.00042379	0.00137
	0.36801	0.08021	0.000425091	0.00138
	0.36914	0.08043	0.000426396	0.00138
	0.37027	0.08065	0.000427705	0.00138
	0.37141	0.08087	0.000429019	0.00139
	0.37256	0.08109	0.000430336	0.00139
	0.3737	0.08131	0.000431657	0.0014
	0.37485	0.08153	0.000432982	0.0014
	0.376	0.08176	0.000434311	0.00141
	0.37716	0.08198	0.000435645	0.00141
	0.37832	0.0822	0.000436982	0.00141
	0.37948	0.08243	0.000438324	0.00142
	0.38065	0.08265	0.000439669	0.00142
	0.38182	0.08288	0.000441019	0.00143
	0.383	0.0831	0.000442373	0.00143
	0.38417	0.08333	0.000443731	0.00144
	0.38536	0.08356	0.000445093	0.00144
	0.38654	0.08378	0.000446459	0.00144
	0.38773	0.08401	0.00044783	0.00145
	0.38892	0.08424	0.000449205	0.00145
	0.39012	0.08447	0.000450584	0.00146
	0.39132	0.0847	0.000451967	0.00146
	0.39252	0.08493	0.000453354	0.00147
	0.39373	0.08516	0.000454746	0.00147
	0.39494	0.08539	0.000456142	0.00147
	0.39616	0.08562	0.000457542	0.00148
	0.39737	0.08585	0.000458947	0.00148
	0.3986	0.08609	0.000460356	0.00149
	0.39982	0.08632	0.000461769	0.00149
	0.40105	0.08655	0.000463186	0.0015
	0.40229	0.08679	0.000464608	0.0015
	0.40352	0.08702	0.000466034	0.00151
	0.40476	0.08726	0.000467465	0.00151
	0.40601	0.08749	0.0004689	0.00151
	0.40726	0.08773	0.000470339	0.00152
	0.40851	0.08797	0.000471783	0.00152
	0.40977	0.08821	0.000473231	0.00153
	0.41103	0.08844	0.000474683	0.00153
	0.41229	0.08868	0.00047614	0.00154
	0.41356	0.08892	0.000477602	0.00154
	0.41483	0.08916	0.000479068	0.00155
	0.41611	0.0894	0.000480538	0.00155
	0.41739	0.08964	0.000482013	0.00156
	0.41867	0.08989	0.000483493	0.00156
	0.41996	0.09013	0.000484977	0.00156
	0.42125	0.09037	0.000486465	0.00157
	0.42255	0.09061	0.000487958	0.00157
	0.42385	0.09086	0.000489456	0.00158
	0.42515	0.0911	0.000490958	0.00158
	0.42646	0.09135	0.000492465	0.00159
	0.42777	0.09159	0.000493977	0.00159
	0.42909	0.09184	0.000495493	0.0016
	0.43041	0.09208	0.000497014	0.0016
	0.43173	0.09233	0.000498539	0.00161
	0.43306	0.09258	0.000500069	0.00161
	0.43439	0.09283	0.000501604	0.00162
	0.43573	0.09308	0.000503143	0.00162
	0.43707	0.09333	0.000504688	0.00163
	0.43841	0.09358	0.000506237	0.00163
	0.43976	0.09383	0.00050779	0.00164
	0.44111	0.09408	0.000509349	0.00164
	0.44247	0.09433	0.000510912	0.00165
	0.44383	0.09458	0.00051248	0.00165
	0.44519	0.09483	0.000514053	0.00165
	0.44656	0.09509	0.00051563	0.00166
	0.44794	0.09534	0.000517213	0.00166
	0.44931	0.0956	0.0005188	0.00167
	0.4507	0.09585	0.000520392	0.00167
	0.45208	0.09611	0.000521989	0.00168
	0.45347	0.09636	0.000523591	0.00168
	0.45487	0.09662	0.000525198	0.00169
	0.45627	0.09688	0.000526809	0.00169
	0.45767	0.09714	0.000528426	0.0017
	0.45908	0.0974	0.000530048	0.0017
	0.46049	0.09765	0.000531674	0.00171
	0.46191	0.09791	0.000533306	0.00171
	0.46333	0.09817	0.000534942	0.00172
	0.46475	0.09844	0.000536584	0.00172
	0.46618	0.0987	0.000538231	0.00173
	0.46762	0.09896	0.000539882	0.00174
	0.46905	0.09922	0.000541539	0.00174
	0.4705	0.09949	0.000543201	0.00175
	0.47194	0.09975	0.000544867	0.00175
	0.4734	0.10001	0.000546539	0.00176
	0.47485	0.10028	0.000548216	0.00176
	0.47631	0.10054	0.000549899	0.00177
	0.47778	0.10081	0.000551586	0.00177
	0.47925	0.10108	0.000553278	0.00178
	0.48072	0.10135	0.000554976	0.00178
	0.4822	0.10161	0.000556679	0.00179
	0.48368	0.10188	0.000558387	0.00179
	0.48517	0.10215	0.0005601	0.0018
	0.48666	0.10242	0.000561819	0.0018
	0.48816	0.10269	0.000563543	0.00181
	0.48966	0.10296	0.000565272	0.00181
	0.49117	0.10323	0.000567006	0.00182
	0.49268	0.10351	0.000568746	0.00182
	0.49419	0.10378	0.000570491	0.00183
	0.49571	0.10405	0.000572241	0.00184
	0.49724	0.10433	0.000573997	0.00184
	0.49877	0.1046	0.000575758	0.00185
	0.5003	0.10488	0.000577525	0.00185
	0.50184	0.10515	0.000579297	0.00186
	0.50339	0.10543	0.000581074	0.00186
	0.50493	0.10571	0.000582857	0.00187
	0.50649	0.10598	0.000584645	0.00187
	0.50804	0.10626	0.000586439	0.00188
	0.50961	0.10654	0.000588238	0.00188
	0.51117	0.10682	0.000590043	0.00189
	0.51275	0.1071	0.000591853	0.0019
	0.51432	0.10738	0.000593668	0.0019
	0.51591	0.10766	0.00059549	0.00191
	0.51749	0.10794	0.000597317	0.00191
	0.51908	0.10823	0.000599149	0.00192
	0.52068	0.10851	0.000600987	0.00192
	0.52228	0.10879	0.000602831	0.00193
	0.52389	0.10908	0.00060468	0.00194
	0.5255	0.10936	0.000606535	0.00194
	0.52712	0.10965	0.000608396	0.00195
	0.52874	0.10993	0.000610262	0.00195
	0.53037	0.11022	0.000612134	0.00196
	0.532	0.11051	0.000614012	0.00196
	0.53363	0.1108	0.000615896	0.00197
	0.53527	0.11108	0.000617785	0.00198
	0.53692	0.11137	0.00061968	0.00198
	0.53857	0.11166	0.000621581	0.00199
	0.54023	0.11195	0.000623488	0.00199
	0.54189	0.11224	0.0006254	0.002
	0.54356	0.11254	0.000627319	0.002
	0.54523	0.11283	0.000629243	0.00201
	0.54691	0.11312	0.000631173	0.00202
	0.54859	0.11341	0.000633109	0.00202
	0.55028	0.11371	0.000635051	0.00203
	0.55197	0.114	0.000636999	0.00203
	0.55367	0.1143	0.000638953	0.00204
	0.55537	0.1146	0.000640912	0.00205
	0.55708	0.11489	0.000642878	0.00205
	0.55879	0.11519	0.00064485	0.00206
	0.56051	0.11549	0.000646828	0.00206
	0.56223	0.11579	0.000648812	0.00207
	0.56396	0.11608	0.000650802	0.00208
	0.5657	0.11638	0.000652798	0.00208
	0.56744	0.11668	0.0006548	0.00209
	0.56918	0.11699	0.000656809	0.00209
	0.57093	0.11729	0.000658823	0.0021
	0.57269	0.11759	0.000660844	0.00211
	0.57445	0.11789	0.00066287	0.00211
	0.57622	0.1182	0.000664903	0.00212
	0.57799	0.1185	0.000666943	0.00213
	0.57977	0.1188	0.000668988	0.00213
	0.58155	0.11911	0.00067104	0.00214
	0.58334	0.11942	0.000673098	0.00214
	0.58513	0.11972	0.000675162	0.00215
	0.58693	0.12003	0.000677232	0.00216
	0.58874	0.12034	0.000679309	0.00216
	0.59055	0.12065	0.000681393	0.00217
	0.59237	0.12096	0.000683482	0.00218
	0.59419	0.12127	0.000685578	0.00218
	0.59602	0.12158	0.000687681	0.00219
	0.59785	0.12189	0.000689789	0.0022
	0.59969	0.1222	0.000691905	0.0022
	0.60153	0.12251	0.000694027	0.00221
	0.60338	0.12282	0.000696155	0.00221
	0.60524	0.12314	0.00069829	0.00222
	0.6071	0.12345	0.000700431	0.00223
	0.60897	0.12377	0.000702579	0.00223
	0.61084	0.12408	0.000704733	0.00224
	0.61272	0.1244	0.000706894	0.00225
	0.61461	0.12472	0.000709062	0.00225
	0.6165	0.12503	0.000711236	0.00226
	0.61839	0.12535	0.000713417	0.00227
	0.62029	0.12567	0.000715604	0.00227
	0.6222	0.12599	0.000717798	0.00228
	0.62412	0.12631	0.000719999	0.00229
	0.62604	0.12663	0.000722207	0.00229
	0.62796	0.12695	0.000724421	0.0023
	0.62989	0.12727	0.000726643	0.00231
	0.63183	0.1276	0.00072887	0.00231
	0.63377	0.12792	0.000731105	0.00232
	0.63572	0.12824	0.000733347	0.00233
	0.63768	0.12857	0.000735595	0.00233
	0.63964	0.12889	0.000737851	0.00234
	0.64161	0.12922	0.000740113	0.00235
	0.64358	0.12955	0.000742382	0.00235
	0.64556	0.12987	0.000744658	0.00236
	0.64755	0.1302	0.000746941	0.00237
	0.64954	0.13053	0.000749231	0.00237
	0.65154	0.13086	0.000751528	0.00238
	0.65354	0.13119	0.000753832	0.00239
	0.65555	0.13152	0.000756143	0.0024
	0.65757	0.13185	0.000758461	0.0024
	0.65959	0.13218	0.000760786	0.00241
	0.66162	0.13251	0.000763118	0.00242
	0.66365	0.13285	0.000765458	0.00242
	0.66569	0.13318	0.000767804	0.00243
	0.66774	0.13351	0.000770158	0.00244
	0.6698	0.13385	0.000772519	0.00245
	0.67186	0.13418	0.000774887	0.00245
	0.67392	0.13452	0.000777263	0.00246
	0.67599	0.13486	0.000779645	0.00247
	0.67807	0.13519	0.000782035	0.00247
	0.68016	0.13553	0.000784432	0.00248
	0.68225	0.13587	0.000786837	0.00249
	0.68435	0.13621	0.000789249	0.0025
	0.68646	0.13655	0.000791668	0.0025
	0.68857	0.13689	0.000794095	0.00251
	0.69068	0.13723	0.000796529	0.00252
	0.69281	0.13757	0.00079897	0.00252
	0.69494	0.13792	0.000801419	0.00253
	0.69708	0.13826	0.000803875	0.00254
	0.69922	0.1386	0.000806339	0.00255
	0.70137	0.13895	0.000808811	0.00255
	0.70353	0.13929	0.00081129	0.00256
	0.70569	0.13964	0.000813776	0.00257
	0.70786	0.13999	0.00081627	0.00258
	0.71004	0.14033	0.000818772	0.00258
	0.71223	0.14068	0.000821282	0.00259
	0.71442	0.14103	0.000823799	0.0026
	0.71661	0.14138	0.000826323	0.00261
	0.71882	0.14173	0.000828856	0.00261
	0.72103	0.14208	0.000831396	0.00262
	0.72325	0.14243	0.000833944	0.00263
	0.72547	0.14278	0.0008365	0.00264
	0.7277	0.14314	0.000839063	0.00264
	0.72994	0.14349	0.000841635	0.00265
	0.73219	0.14384	0.000844214	0.00266
	0.73444	0.1442	0.000846801	0.00267
	0.7367	0.14455	0.000849396	0.00267
	0.73896	0.14491	0.000851999	0.00268
	0.74124	0.14526	0.00085461	0.00269
	0.74352	0.14562	0.000857229	0.0027
	0.7458	0.14598	0.000859855	0.00271
	0.7481	0.14634	0.00086249	0.00271
	0.7504	0.1467	0.000865133	0.00272
	0.75271	0.14706	0.000867784	0.00273
	0.75502	0.14742	0.000870443	0.00274
	0.75734	0.14778	0.00087311	0.00275
	0.75967	0.14814	0.000875786	0.00275
	0.76201	0.1485	0.000878469	0.00276
	0.76435	0.14886	0.000881161	0.00277
	0.7667	0.14923	0.000883861	0.00278
	0.76906	0.14959	0.000886569	0.00279
	0.77143	0.14996	0.000889285	0.00279
	0.7738	0.15032	0.00089201	0.0028
	0.77618	0.15069	0.000894743	0.00281
	0.77857	0.15106	0.000897484	0.00282
	0.78096	0.15142	0.000900234	0.00283
	0.78337	0.15179	0.000902992	0.00283
	0.78578	0.15216	0.000905758	0.00284
	0.78819	0.15253	0.000908533	0.00285
	0.79062	0.1529	0.000911317	0.00286
	0.79305	0.15327	0.000914109	0.00287
	0.79549	0.15364	0.000916909	0.00287
	0.79793	0.15402	0.000919718	0.00288
	0.80039	0.15439	0.000922536	0.00289
	0.80285	0.15476	0.000925362	0.0029
	0.80532	0.15514	0.000928197	0.00291
	0.8078	0.15551	0.00093104	0.00292
	0.81028	0.15589	0.000933892	0.00292
	0.81277	0.15626	0.000936753	0.00293
	0.81527	0.15664	0.000939622	0.00294
	0.81778	0.15702	0.000942501	0.00295
	0.8203	0.1574	0.000945388	0.00296
	0.82282	0.15777	0.000948284	0.00297
	0.82535	0.15815	0.000951188	0.00298
	0.82789	0.15853	0.000954102	0.00298
	0.83044	0.15891	0.000957024	0.00299
	0.83299	0.1593	0.000959956	0.003
	0.83555	0.15968	0.000962896	0.00301
	0.83812	0.16006	0.000965845	0.00302
	0.8407	0.16044	0.000968803	0.00303
	0.84329	0.16083	0.000971771	0.00304
	0.84588	0.16121	0.000974747	0.00304
	0.84848	0.1616	0.000977732	0.00305
	0.85109	0.16198	0.000980727	0.00306
	0.85371	0.16237	0.00098373	0.00307
	0.85634	0.16276	0.000986743	0.00308
	0.85897	0.16315	0.000989765	0.00309
	0.86161	0.16354	0.000992796	0.0031
	0.86426	0.16392	0.000995837	0.00311
	0.86692	0.16431	0.000998887	0.00312
	0.86959	0.1647	0.001	0.00312
	0.87226	0.1651	0.00101	0.00313
	0.87494	0.16549	0.00101	0.00314
	0.87764	0.16588	0.00101	0.00315
	0.88034	0.16627	0.00101	0.00316
	0.88304	0.16667	0.00102	0.00317
	0.88576	0.16706	0.00102	0.00318
	0.88848	0.16746	0.00102	0.00319
	0.89122	0.16785	0.00103	0.0032
	0.89396	0.16825	0.00103	0.00321
	0.89671	0.16865	0.00103	0.00321
	0.89947	0.16904	0.00104	0.00322
	0.90223	0.16944	0.00104	0.00323
	0.90501	0.16984	0.00104	0.00324
	0.90779	0.17024	0.00105	0.00325
	0.91058	0.17064	0.00105	0.00326
	0.91338	0.17104	0.00105	0.00327
	0.91619	0.17145	0.00106	0.00328
	0.91901	0.17185	0.00106	0.00329
	0.92184	0.17225	0.00106	0.0033
	0.92467	0.17265	0.00107	0.00331
	0.92752	0.17306	0.00107	0.00332
	0.93037	0.17346	0.00107	0.00333
	0.93323	0.17387	0.00107	0.00334
	0.9361	0.17428	0.00108	0.00335
	0.93898	0.17468	0.00108	0.00336
	0.94187	0.17509	0.00108	0.00336
	0.94477	0.1755	0.00109	0.00337
	0.94767	0.17591	0.00109	0.00338
	0.95059	0.17632	0.00109	0.00339
	0.95351	0.17673	0.0011	0.0034
	0.95645	0.17714	0.0011	0.00341
	0.95939	0.17755	0.0011	0.00342
	0.96234	0.17796	0.00111	0.00343
	0.9653	0.17837	0.00111	0.00344
	0.96827	0.17879	0.00112	0.00345
	0.97125	0.1792	0.00112	0.00346
	0.97423	0.17962	0.00112	0.00347
	0.97723	0.18003	0.00113	0.00348
	0.98024	0.18045	0.00113	0.00349
	0.98325	0.18086	0.00113	0.0035
	0.98627	0.18128	0.00114	0.00351
	0.98931	0.1817	0.00114	0.00352
	0.99235	0.18212	0.00114	0.00353
	0.9954	0.18254	0.00115	0.00354
	0.99847	0.18296	0.00115	0.00355
	1.00154	0.18338	0.00115	0.00356
	1.00462	0.1838	0.00116	0.00357
	1.00771	0.18422	0.00116	0.00358
	1.01081	0.18464	0.00116	0.00359
	1.01392	0.18507	0.00117	0.0036
	1.01703	0.18549	0.00117	0.00361
	1.02016	0.18591	0.00117	0.00362
	1.0233	0.18634	0.00118	0.00363
	1.02645	0.18676	0.00118	0.00364
	1.02961	0.18719	0.00119	0.00365
	1.03277	0.18762	0.00119	0.00366
	1.03595	0.18804	0.00119	0.00367
	1.03914	0.18847	0.0012	0.00368
	1.04233	0.1889	0.0012	0.00369
	1.04554	0.18933	0.0012	0.00371
	1.04875	0.18976	0.00121	0.00372
	1.05198	0.19019	0.00121	0.00373
	1.05522	0.19062	0.00121	0.00374
	1.05846	0.19105	0.00122	0.00375
	1.06172	0.19149	0.00122	0.00376
	1.06498	0.19192	0.00123	0.00377
	1.06826	0.19235	0.00123	0.00378
	1.07154	0.19279	0.00123	0.00379
	1.07484	0.19322	0.00124	0.0038
	1.07815	0.19366	0.00124	0.00381
	1.08146	0.19409	0.00124	0.00382
	1.08479	0.19453	0.00125	0.00383
	1.08813	0.19497	0.00125	0.00384
	1.09147	0.19541	0.00126	0.00385
	1.09483	0.19585	0.00126	0.00386
	1.0982	0.19628	0.00126	0.00388
	1.10157	0.19672	0.00127	0.00389
	1.10496	0.19717	0.00127	0.0039
	1.10836	0.19761	0.00128	0.00391
	1.11177	0.19805	0.00128	0.00392
	1.11519	0.19849	0.00128	0.00393
	1.11862	0.19893	0.00129	0.00394
	1.12206	0.19938	0.00129	0.00395
	1.12551	0.19982	0.0013	0.00396
	1.12897	0.20027	0.0013	0.00397
	1.13245	0.20071	0.0013	0.00399
	1.13593	0.20116	0.00131	0.004
	1.13942	0.2016	0.00131	0.00401
	1.14293	0.20205	0.00132	0.00402
	1.14644	0.2025	0.00132	0.00403
	1.14997	0.20295	0.00132	0.00404
	1.15351	0.2034	0.00133	0.00405
	1.15706	0.20385	0.00133	0.00406
	1.16062	0.2043	0.00134	0.00408
	1.16419	0.20475	0.00134	0.00409
	1.16777	0.2052	0.00134	0.0041
	1.17136	0.20565	0.00135	0.00411
	1.17496	0.20611	0.00135	0.00412
	1.17857	0.20656	0.00136	0.00413
	1.1822	0.20701	0.00136	0.00415
	1.18584	0.20747	0.00136	0.00416
	1.18948	0.20792	0.00137	0.00417
	1.19314	0.20838	0.00137	0.00418
	1.19681	0.20883	0.00138	0.00419
	1.20049	0.20929	0.00138	0.0042
	1.20419	0.20975	0.00139	0.00422
	1.20789	0.21021	0.00139	0.00423
	1.21161	0.21067	0.00139	0.00424
	1.21533	0.21113	0.0014	0.00425
	1.21907	0.21159	0.0014	0.00426
	1.22282	0.21205	0.00141	0.00427
	1.22658	0.21251	0.00141	0.00429
	1.23035	0.21297	0.00142	0.0043
	1.23414	0.21343	0.00142	0.00431
	1.23793	0.21389	0.00142	0.00432
	1.24174	0.21436	0.00143	0.00433
	1.24556	0.21482	0.00143	0.00435
	1.24939	0.21529	0.00144	0.00436
	1.25324	0.21575	0.00144	0.00437
	1.25709	0.21622	0.00145	0.00438
	1.26096	0.21668	0.00145	0.00439
	1.26484	0.21715	0.00145	0.00441
	1.26873	0.21762	0.00146	0.00442
	1.27263	0.21809	0.00146	0.00443
	1.27654	0.21855	0.00147	0.00444
	1.28047	0.21902	0.00147	0.00446
	1.28441	0.21949	0.00148	0.00447
	1.28836	0.21996	0.00148	0.00448
	1.29232	0.22043	0.00149	0.00449
	1.2963	0.22091	0.00149	0.00451
	1.30028	0.22138	0.00149	0.00452
	1.30428	0.22185	0.0015	0.00453
	1.30829	0.22232	0.0015	0.00454
	1.31232	0.2228	0.00151	0.00456
	1.31636	0.22327	0.00151	0.00457
	1.3204	0.22375	0.00152	0.00458
	1.32447	0.22422	0.00152	0.00459
	1.32854	0.2247	0.00153	0.00461
	1.33263	0.22517	0.00153	0.00462
	1.33672	0.22565	0.00154	0.00463
	1.34084	0.22613	0.00154	0.00464
	1.34496	0.22661	0.00155	0.00466
	1.3491	0.22709	0.00155	0.00467
	1.35325	0.22757	0.00156	0.00468
	1.35741	0.22805	0.00156	0.0047
	1.36158	0.22853	0.00156	0.00471
	1.36577	0.22901	0.00157	0.00472
	1.36997	0.22949	0.00157	0.00474
	1.37419	0.22997	0.00158	0.00475
	1.37841	0.23045	0.00158	0.00476
	1.38265	0.23094	0.00159	0.00477
	1.38691	0.23142	0.00159	0.00479
	1.39117	0.2319	0.0016	0.0048
	1.39545	0.23239	0.0016	0.00481
	1.39974	0.23287	0.00161	0.00483
	1.40405	0.23336	0.00161	0.00484
	1.40837	0.23385	0.00162	0.00485
	1.4127	0.23433	0.00162	0.00487
	1.41705	0.23482	0.00163	0.00488
	1.4214	0.23531	0.00163	0.00489
	1.42578	0.2358	0.00164	0.00491
	1.43016	0.23628	0.00164	0.00492
	1.43456	0.23677	0.00165	0.00493
	1.43897	0.23726	0.00165	0.00495
	1.4434	0.23775	0.00166	0.00496
	1.44784	0.23825	0.00166	0.00497
	1.45229	0.23874	0.00167	0.00499
	1.45676	0.23923	0.00167	0.005
	1.46124	0.23972	0.00168	0.00502
	1.46573	0.24022	0.00168	0.00503
	1.47024	0.24071	0.00169	0.00504
	1.47477	0.2412	0.00169	0.00506
	1.4793	0.2417	0.0017	0.00507
	1.48385	0.24219	0.0017	0.00508
	1.48842	0.24269	0.00171	0.0051
	1.49299	0.24318	0.00171	0.00511
	1.49759	0.24368	0.00172	0.00513
	1.50219	0.24418	0.00173	0.00514
	1.50681	0.24468	0.00173	0.00515
	1.51145	0.24517	0.00174	0.00517
	1.5161	0.24567	0.00174	0.00518
	1.52076	0.24617	0.00175	0.0052
	1.52544	0.24667	0.00175	0.00521
	1.53013	0.24717	0.00176	0.00523
	1.53484	0.24767	0.00176	0.00524
	1.53956	0.24817	0.00177	0.00525
	1.54429	0.24867	0.00177	0.00527
	1.54904	0.24918	0.00178	0.00528
	1.55381	0.24968	0.00178	0.0053
	1.55859	0.25018	0.00179	0.00531
	1.56338	0.25069	0.0018	0.00533
	1.56819	0.25119	0.0018	0.00534
	1.57301	0.25169	0.00181	0.00535
	1.57785	0.2522	0.00181	0.00537
	1.5827	0.2527	0.00182	0.00538
	1.58757	0.25321	0.00182	0.0054
	1.59246	0.25372	0.00183	0.00541
	1.59735	0.25422	0.00183	0.00543
	1.60227	0.25473	0.00184	0.00544
	1.6072	0.25524	0.00184	0.00546
	1.61214	0.25575	0.00185	0.00547
	1.6171	0.25626	0.00186	0.00549
	1.62207	0.25676	0.00186	0.0055
	1.62706	0.25727	0.00187	0.00552
	1.63207	0.25778	0.00187	0.00553
	1.63709	0.25829	0.00188	0.00555
	1.64212	0.25881	0.00188	0.00556
	1.64717	0.25932	0.00189	0.00558
	1.65224	0.25983	0.0019	0.00559
	1.65732	0.26034	0.0019	0.00561
	1.66242	0.26085	0.00191	0.00562
	1.66753	0.26137	0.00191	0.00564
	1.67266	0.26188	0.00192	0.00565
	1.67781	0.26239	0.00193	0.00567
	1.68297	0.26291	0.00193	0.00568
	1.68814	0.26342	0.00194	0.0057
	1.69334	0.26394	0.00194	0.00571
	1.69854	0.26446	0.00195	0.00573
	1.70377	0.26497	0.00195	0.00574
	1.70901	0.26549	0.00196	0.00576
	1.71427	0.26601	0.00197	0.00577
	1.71954	0.26652	0.00197	0.00579
	1.72483	0.26704	0.00198	0.00581
	1.73013	0.26756	0.00198	0.00582
	1.73545	0.26808	0.00199	0.00584
	1.74079	0.2686	0.002	0.00585
	1.74615	0.26912	0.002	0.00587
	1.75152	0.26964	0.00201	0.00588
	1.7569	0.27016	0.00202	0.0059
	1.76231	0.27068	0.00202	0.00592
	1.76773	0.2712	0.00203	0.00593
	1.77317	0.27172	0.00203	0.00595
	1.77862	0.27224	0.00204	0.00596
	1.78409	0.27276	0.00205	0.00598
	1.78958	0.27329	0.00205	0.00599
	1.79508	0.27381	0.00206	0.00601
	1.80061	0.27433	0.00207	0.00603
	1.80614	0.27486	0.00207	0.00604
	1.8117	0.27538	0.00208	0.00606
	1.81727	0.27591	0.00208	0.00607
	1.82286	0.27643	0.00209	0.00609
	1.82847	0.27696	0.0021	0.00611
	1.83409	0.27748	0.0021	0.00612
	1.83973	0.27801	0.00211	0.00614
	1.84539	0.27854	0.00212	0.00616
	1.85107	0.27906	0.00212	0.00617
	1.85676	0.27959	0.00213	0.00619
	1.86247	0.28012	0.00214	0.00621
	1.8682	0.28065	0.00214	0.00622
	1.87395	0.28118	0.00215	0.00624
	1.87971	0.2817	0.00215	0.00625
	1.88549	0.28223	0.00216	0.00627
	1.89129	0.28276	0.00217	0.00629
	1.89711	0.28329	0.00217	0.0063
	1.90295	0.28382	0.00218	0.00632
	1.9088	0.28435	0.00219	0.00634
	1.91467	0.28489	0.00219	0.00636
	1.92056	0.28542	0.0022	0.00637
	1.92647	0.28595	0.00221	0.00639
	1.93239	0.28648	0.00221	0.00641
	1.93834	0.28701	0.00222	0.00642
	1.9443	0.28755	0.00223	0.00644
	1.95028	0.28808	0.00223	0.00646
	1.95628	0.28861	0.00224	0.00647
	1.96229	0.28915	0.00225	0.00649
	1.96833	0.28968	0.00226	0.00651
	1.97438	0.29021	0.00226	0.00652
	1.98046	0.29075	0.00227	0.00654
	1.98655	0.29128	0.00228	0.00656
	1.99266	0.29182	0.00228	0.00658
	1.99879	0.29236	0.00229	0.00659
	2.00494	0.29289	0.0023	0.00661
	2.0111	0.29343	0.0023	0.00663
	2.01729	0.29396	0.00231	0.00665
	2.02349	0.2945	0.00232	0.00666
	2.02972	0.29504	0.00233	0.00668
	2.03596	0.29558	0.00233	0.0067
	2.04222	0.29611	0.00234	0.00672
	2.04851	0.29665	0.00235	0.00673
	2.05481	0.29719	0.00235	0.00675
	2.06113	0.29773	0.00236	0.00677
	2.06747	0.29827	0.00237	0.00679
	2.07383	0.29881	0.00238	0.0068
	2.0802	0.29935	0.00238	0.00682
	2.0866	0.29989	0.00239	0.00684
	2.09302	0.30043	0.0024	0.00686
	2.09946	0.30097	0.0024	0.00688
	2.10592	0.30151	0.00241	0.00689
	2.11239	0.30205	0.00242	0.00691
	2.11889	0.30259	0.00243	0.00693
	2.12541	0.30313	0.00243	0.00695
	2.13195	0.30368	0.00244	0.00697
	2.1385	0.30422	0.00245	0.00698
	2.14508	0.30476	0.00246	0.007
	2.15168	0.3053	0.00246	0.00702
	2.1583	0.30585	0.00247	0.00704
	2.16494	0.30639	0.00248	0.00706
	2.1716	0.30693	0.00249	0.00708
	2.17827	0.30748	0.00249	0.00709
	2.18498	0.30802	0.0025	0.00711
	2.1917	0.30857	0.00251	0.00713
	2.19844	0.30911	0.00252	0.00715
	2.2052	0.30965	0.00252	0.00717
	2.21198	0.3102	0.00253	0.00719
	2.21879	0.31074	0.00254	0.0072
	2.22561	0.31129	0.00255	0.00722
	2.23246	0.31184	0.00255	0.00724
	2.23932	0.31238	0.00256	0.00726
	2.24621	0.31293	0.00257	0.00728
	2.25312	0.31347	0.00258	0.0073
	2.26005	0.31402	0.00259	0.00732
	2.267	0.31457	0.00259	0.00734
	2.27397	0.31512	0.0026	0.00735
	2.28097	0.31566	0.00261	0.00737
	2.28798	0.31621	0.00262	0.00739
	2.29502	0.31676	0.00263	0.00741
	2.30208	0.31731	0.00263	0.00743
	2.30916	0.31785	0.00264	0.00745
	2.31627	0.3184	0.00265	0.00747
	2.32339	0.31895	0.00266	0.00749
	2.33054	0.3195	0.00267	0.00751
	2.3377	0.32005	0.00267	0.00753
	2.34489	0.3206	0.00268	0.00755
	2.35211	0.32115	0.00269	0.00757
	2.35934	0.3217	0.0027	0.00759
	2.3666	0.32225	0.00271	0.0076
	2.37388	0.3228	0.00271	0.00762
	2.38118	0.32335	0.00272	0.00764
	2.3885	0.3239	0.00273	0.00766
	2.39585	0.32445	0.00274	0.00768
	2.40322	0.325	0.00275	0.0077
	2.41061	0.32555	0.00276	0.00772
	2.41803	0.3261	0.00276	0.00774
	2.42546	0.32665	0.00277	0.00776
	2.43292	0.3272	0.00278	0.00778
	2.44041	0.32775	0.00279	0.0078
	2.44791	0.32831	0.0028	0.00782
	2.45544	0.32886	0.00281	0.00784
	2.463	0.32941	0.00282	0.00786
	2.47057	0.32996	0.00282	0.00788
	2.47817	0.33052	0.00283	0.0079
	2.48579	0.33107	0.00284	0.00792
	2.49344	0.33162	0.00285	0.00794
	2.50111	0.33217	0.00286	0.00796
	2.5088	0.33273	0.00287	0.00798
	2.51652	0.33328	0.00288	0.008
	2.52426	0.33383	0.00288	0.00802
	2.53202	0.33439	0.00289	0.00804
	2.53981	0.33494	0.0029	0.00806
	2.54762	0.33549	0.00291	0.00808
	2.55546	0.33605	0.00292	0.0081
	2.56332	0.3366	0.00293	0.00812
	2.57121	0.33715	0.00294	0.00814
	2.57911	0.33771	0.00295	0.00816
	2.58705	0.33826	0.00296	0.00819
	2.595	0.33882	0.00296	0.00821
	2.60299	0.33937	0.00297	0.00823
	2.61099	0.33993	0.00298	0.00825
	2.61902	0.34048	0.00299	0.00827
	2.62708	0.34104	0.003	0.00829
	2.63516	0.34159	0.00301	0.00831
	2.64327	0.34214	0.00302	0.00833
	2.6514	0.3427	0.00303	0.00835
	2.65955	0.34326	0.00304	0.00837
	2.66773	0.34381	0.00305	0.00839
	2.67594	0.34437	0.00306	0.00841
	2.68417	0.34492	0.00306	0.00844
	2.69242	0.34548	0.00307	0.00846
	2.70071	0.34603	0.00308	0.00848
	2.70901	0.34659	0.00309	0.0085
	2.71734	0.34714	0.0031	0.00852
	2.7257	0.3477	0.00311	0.00854
	2.73409	0.34826	0.00312	0.00856
	2.7425	0.34881	0.00313	0.00858
	2.75093	0.34937	0.00314	0.00861
	2.75939	0.34992	0.00315	0.00863
	2.76788	0.35048	0.00316	0.00865
	2.77639	0.35104	0.00317	0.00867
	2.78493	0.35159	0.00318	0.00869
	2.7935	0.35215	0.00319	0.00871
	2.80209	0.3527	0.0032	0.00874
	2.81071	0.35326	0.00321	0.00876
	2.81936	0.35382	0.00322	0.00878
	2.82803	0.35437	0.00323	0.0088
	2.83673	0.35493	0.00324	0.00882
	2.84545	0.35549	0.00325	0.00884
	2.8542	0.35604	0.00326	0.00887
	2.86298	0.3566	0.00327	0.00889
	2.87179	0.35716	0.00328	0.00891
	2.88062	0.35771	0.00329	0.00893
	2.88948	0.35827	0.0033	0.00895
	2.89837	0.35883	0.00331	0.00898
	2.90729	0.35938	0.00332	0.009
	2.91623	0.35994	0.00333	0.00902
	2.9252	0.3605	0.00334	0.00904
	2.9342	0.36105	0.00335	0.00907
	2.94322	0.36161	0.00336	0.00909
	2.95227	0.36217	0.00337	0.00911
	2.96136	0.36272	0.00338	0.00913
	2.97046	0.36328	0.00339	0.00915
	2.9796	0.36384	0.0034	0.00918
	2.98877	0.36439	0.00341	0.0092
	2.99796	0.36495	0.00342	0.00922
	3.00718	0.36551	0.00343	0.00924
	3.01643	0.36606	0.00344	0.00927
	3.02571	0.36662	0.00345	0.00929
	3.03501	0.36718	0.00346	0.00931
	3.04435	0.36773	0.00347	0.00934
	3.05371	0.36829	0.00348	0.00936
	3.06311	0.36885	0.00349	0.00938
	3.07253	0.3694	0.0035	0.0094
	3.08198	0.36996	0.00351	0.00943
	3.09146	0.37052	0.00352	0.00945
	3.10097	0.37107	0.00353	0.00947
	3.11051	0.37163	0.00354	0.0095
	3.12007	0.37219	0.00355	0.00952
	3.12967	0.37274	0.00357	0.00954
	3.1393	0.3733	0.00358	0.00957
	3.14895	0.37386	0.00359	0.00959
	3.15864	0.37441	0.0036	0.00961
	3.16835	0.37497	0.00361	0.00964
	3.1781	0.37552	0.00362	0.00966
	3.18787	0.37608	0.00363	0.00968
	3.19768	0.37664	0.00364	0.00971
	3.20752	0.37719	0.00365	0.00973
	3.21738	0.37775	0.00366	0.00975
	3.22728	0.3783	0.00367	0.00978
	3.2372	0.37886	0.00369	0.0098
	3.24716	0.37941	0.0037	0.00982
	3.25715	0.37997	0.00371	0.00985
	3.26717	0.38053	0.00372	0.00987
	3.27722	0.38108	0.00373	0.00989
	3.2873	0.38164	0.00374	0.00992
	3.29741	0.38219	0.00375	0.00994
	3.30755	0.38275	0.00376	0.00997
	3.31772	0.3833	0.00378	0.00999
	3.32793	0.38386	0.00379	0.01001
	3.33817	0.38441	0.0038	0.01004
	3.34843	0.38497	0.00381	0.01006
	3.35873	0.38552	0.00382	0.01009
	3.36906	0.38607	0.00383	0.01011
	3.37943	0.38663	0.00385	0.01013
	3.38982	0.38718	0.00386	0.01016
	3.40025	0.38774	0.00387	0.01018
	3.41071	0.38829	0.00388	0.01021
	3.4212	0.38885	0.00389	0.01023
	3.43172	0.3894	0.0039	0.01026
	3.44228	0.38995	0.00392	0.01028
	3.45286	0.39051	0.00393	0.0103
	3.46348	0.39106	0.00394	0.01033
	3.47414	0.39161	0.00395	0.01035
	3.48482	0.39217	0.00396	0.01038
	3.49554	0.39272	0.00398	0.0104
	3.50629	0.39327	0.00399	0.01043
	3.51708	0.39382	0.004	0.01045
	3.5279	0.39438	0.00401	0.01048
	3.53875	0.39493	0.00402	0.0105
	3.54963	0.39548	0.00404	0.01053
	3.56055	0.39603	0.00405	0.01055
	3.5715	0.39659	0.00406	0.01058
	3.58249	0.39714	0.00407	0.0106
	3.59351	0.39769	0.00408	0.01063
	3.60456	0.39824	0.0041	0.01065
	3.61565	0.39879	0.00411	0.01068
	3.62677	0.39934	0.00412	0.0107
	3.63792	0.39989	0.00413	0.01073
	3.64911	0.40045	0.00415	0.01075
	3.66034	0.401	0.00416	0.01078
	3.6716	0.40155	0.00417	0.0108
	3.68289	0.4021	0.00418	0.01083
	3.69422	0.40265	0.0042	0.01085
	3.70558	0.4032	0.00421	0.01088
	3.71698	0.40375	0.00422	0.0109
	3.72841	0.4043	0.00424	0.01093
	3.73988	0.40485	0.00425	0.01096
	3.75138	0.40539	0.00426	0.01098
	3.76292	0.40594	0.00427	0.01101
	3.7745	0.40649	0.00429	0.01103
	3.78611	0.40704	0.0043	0.01106
	3.79775	0.40759	0.00431	0.01108
	3.80943	0.40814	0.00433	0.01111
	3.82115	0.40868	0.00434	0.01114
	3.8329	0.40923	0.00435	0.01116
	3.84469	0.40978	0.00436	0.01119
	3.85652	0.41033	0.00438	0.01121
	3.86838	0.41087	0.00439	0.01124
	3.88028	0.41142	0.0044	0.01127
	3.89221	0.41197	0.00442	0.01129
	3.90419	0.41251	0.00443	0.01132
	3.91619	0.41306	0.00444	0.01134
	3.92824	0.41361	0.00446	0.01137
	3.94032	0.41415	0.00447	0.0114
	3.95244	0.4147	0.00448	0.01142
	3.9646	0.41524	0.0045	0.01145
	3.97679	0.41579	0.00451	0.01147
	3.98903	0.41633	0.00453	0.0115
	4.0013	0.41688	0.00454	0.01153
	4.0136	0.41742	0.00455	0.01155
	4.02595	0.41796	0.00457	0.01158
	4.03833	0.41851	0.00458	0.01161
	4.05075	0.41905	0.00459	0.01163
	4.06321	0.41959	0.00461	0.01166
	4.07571	0.42014	0.00462	0.01169
	4.08825	0.42068	0.00464	0.01171
	4.10082	0.42122	0.00465	0.01174
	4.11344	0.42176	0.00466	0.01177
	4.12609	0.42231	0.00468	0.01179
	4.13878	0.42285	0.00469	0.01182
	4.15151	0.42339	0.00471	0.01185
	4.16428	0.42393	0.00472	0.01187
	4.17709	0.42447	0.00473	0.0119
	4.18994	0.42501	0.00475	0.01193
	4.20282	0.42555	0.00476	0.01196
	4.21575	0.42609	0.00478	0.01198
	4.22872	0.42663	0.00479	0.01201
	4.24173	0.42717	0.00481	0.01204
	4.25477	0.42771	0.00482	0.01206
	4.26786	0.42825	0.00483	0.01209
	4.28099	0.42878	0.00485	0.01212
	4.29415	0.42932	0.00486	0.01215
	4.30736	0.42986	0.00488	0.01217
	4.32061	0.4304	0.00489	0.0122
	4.3339	0.43094	0.00491	0.01223
	4.34723	0.43147	0.00492	0.01226
	4.3606	0.43201	0.00494	0.01228
	4.37402	0.43254	0.00495	0.01231
	4.38747	0.43308	0.00497	0.01234
	4.40096	0.43362	0.00498	0.01237
	4.4145	0.43415	0.005	0.01239
	4.42808	0.43469	0.00501	0.01242
	4.4417	0.43522	0.00503	0.01245
	4.45536	0.43576	0.00504	0.01248
	4.46907	0.43629	0.00506	0.0125
	4.48281	0.43682	0.00507	0.01253
	4.4966	0.43736	0.00509	0.01256
	4.51043	0.43789	0.0051	0.01259
	4.5243	0.43842	0.00512	0.01262
	4.53822	0.43895	0.00513	0.01264
	4.55218	0.43949	0.00515	0.01267
	4.56618	0.44002	0.00517	0.0127
	4.58023	0.44055	0.00518	0.01273
	4.59431	0.44108	0.0052	0.01276
[truncated: 1,003 more rows]

## Sheet: Appendix 1-fig. 3A-B
	Source data for Appendix 1-figure 3A
	Growth rate (1/h)	Relative protein expression data of enzymes in glycolysis
		pgi	pfkA	fbaA	tpiA	gapA	pgk	gpmA	eno	pykF	aceE
	Reference: Molecular Systems Biology 11, 784 (2015)
	0.57762	0.65955	0.83756	0.69192	0.75361	0.60637	0.71478	0.91066	0.5055	0.40982	0.6642
	0.67079	0.75964	0.8813	0.72663	0.7789	0.63453	0.81178	0.90397	0.57664	0.46682	0.7108
	0.86643	1.0238	0.94135	0.90355	0.91854	0.85759	0.9138	0.93604	0.83436	0.78382	0.93348
	1.0397	0.9905	1.0235	1.0386	1.0326	1.057	1.0345	1.0256	1.0663	1.0865	1.0266
	Source data for Appendix 1-figure 3B
	Growth rate (1/h)	Relative protein expression data of enzymes in the TCA cycle
		gltA	acnB	icd	sucA	sucB	sucC	sucD	sdhA	sdhB	fumA	mdh
	Reference: Molecular Systems Biology 11, 784 (2015)
	0.57762	1.6901	1.9275	1.189	1.2219	1.1429	1.7479	1.638	1.3873	1.4936	1.9937	1.0355
	0.67079	1.8305	1.8267	1.1896	1.292	1.2204	1.7677	1.7445	1.3709	1.4603	1.9609	0.99252
	0.86643	1.4941	1.2365	0.96674	1.2184	1.2003	1.4455	1.4083	1.2482	1.275	1.2802	0.99143
	1.0397	0.80238	0.90539	1.0133	0.91263	0.91988	0.82181	0.83666	0.90071	0.88998	0.88791	1.0034

## Sheet: Appendix 1-fig. 3C
	Theoretical results						Experimental data
	Genes in glycolysis
	pykF		eno		gapA		pykF		eno		gapA
	Obtained from Eq. S118						Reference: Molecular Systems Biology 11, 784 (2015)
	Growth rate (1/h)	Relative protein expression	Growth rate (1/h)	Relative protein expression	Growth rate (1/h)	Relative protein expression	Growth rate (1/h)	Relative protein expression	Growth rate (1/h)	Relative protein expression	Growth rate (1/h)	Relative protein expression
	0	0	0	0	0	0	0.57762	0.40982	0.57762	0.5055	0.57762	0.60637
	0.01162	0.00797	0.01162	0.00987	0.01162	0.0109	0.67079	0.46682	0.67079	0.57664	0.67079	0.63453
	0.02323	0.01594	0.02323	0.01975	0.02323	0.0218	0.86643	0.78382	0.86643	0.83436	0.86643	0.85759
	0.03485	0.02391	0.03485	0.02962	0.03485	0.03271	1.0397	1.0865	1.0397	1.0663	1.0397	1.057
	0.04646	0.03188	0.04646	0.03949	0.04646	0.04361
	0.05808	0.03986	0.05808	0.04937	0.05808	0.05451
	0.0697	0.04783	0.0697	0.05924	0.0697	0.06541
	0.08131	0.0558	0.08131	0.06911	0.08131	0.07631
	0.09293	0.06377	0.09293	0.07899	0.09293	0.08721
	0.10455	0.07174	0.10455	0.08886	0.10455	0.09812
	0.11616	0.07971	0.11616	0.09873	0.11616	0.10902
	0.12778	0.08768	0.12778	0.10861	0.12778	0.11992
	0.13939	0.09565	0.13939	0.11848	0.13939	0.13082
	0.15101	0.10363	0.15101	0.12835	0.15101	0.14172
	0.16263	0.1116	0.16263	0.13823	0.16263	0.15263
	0.17424	0.11957	0.17424	0.1481	0.17424	0.16353
	0.18586	0.12754	0.18586	0.15797	0.18586	0.17443
	0.19747	0.13551	0.19747	0.16785	0.19747	0.18533
	0.20909	0.14348	0.20909	0.17772	0.20909	0.19623
	0.22071	0.15145	0.22071	0.18759	0.22071	0.20714
	0.23232	0.15942	0.23232	0.19747	0.23232	0.21804
	0.24394	0.1674	0.24394	0.20734	0.24394	0.22894
	0.25556	0.17537	0.25556	0.21721	0.25556	0.23984
	0.26717	0.18334	0.26717	0.22709	0.26717	0.25074
	0.27879	0.19131	0.27879	0.23696	0.27879	0.26164
	0.2904	0.19928	0.2904	0.24683	0.2904	0.27255
	0.30202	0.20725	0.30202	0.25671	0.30202	0.28345
	0.31364	0.21522	0.31364	0.26658	0.31364	0.29435
	0.32525	0.22319	0.32525	0.27645	0.32525	0.30525
	0.33687	0.23116	0.33687	0.28633	0.33687	0.31615
	0.34848	0.23914	0.34848	0.2962	0.34848	0.32706
	0.3601	0.24711	0.3601	0.30607	0.3601	0.33796
	0.37172	0.25508	0.37172	0.31595	0.37172	0.34886
	0.38333	0.26305	0.38333	0.32582	0.38333	0.35976
	0.39495	0.27102	0.39495	0.3357	0.39495	0.37066
	0.40657	0.27899	0.40657	0.34557	0.40657	0.38157
	0.41818	0.28696	0.41818	0.35544	0.41818	0.39247
	0.4298	0.29494	0.4298	0.36532	0.4298	0.40337
	0.44141	0.30291	0.44141	0.37519	0.44141	0.41427
	0.45303	0.31088	0.45303	0.38506	0.45303	0.42518
	0.46465	0.31885	0.46465	0.39494	0.46465	0.43608
	0.47626	0.32683	0.47626	0.40482	0.47626	0.44698
	0.48788	0.3348	0.48788	0.41469	0.48788	0.45789
	0.49949	0.34278	0.49949	0.42457	0.49949	0.4688
	0.51111	0.35076	0.51111	0.43445	0.51111	0.47971
	0.52273	0.35875	0.52273	0.44434	0.52273	0.49063
	0.53434	0.36674	0.53434	0.45423	0.53434	0.50155
	0.54596	0.37475	0.54596	0.46414	0.54596	0.51249
	0.55758	0.38277	0.55758	0.47406	0.55758	0.52344
	0.56919	0.39081	0.56919	0.48399	0.56919	0.53441
	0.58081	0.39888	0.58081	0.49396	0.58081	0.54541
	0.59242	0.407	0.59242	0.50396	0.59242	0.55645
	0.60404	0.41517	0.60404	0.51401	0.60404	0.56755
	0.61566	0.42341	0.61566	0.52413	0.61566	0.57872
	0.62727	0.43176	0.62727	0.53433	0.62727	0.58999
	0.63889	0.44024	0.63889	0.54465	0.63889	0.60139
	0.65051	0.44888	0.65051	0.55513	0.65051	0.61295
	0.66212	0.45774	0.66212	0.56579	0.66212	0.62472
	0.67374	0.46686	0.67374	0.57668	0.67374	0.63676
	0.68535	0.47632	0.68535	0.58788	0.68535	0.64912
	0.69697	0.48618	0.69697	0.59943	0.69697	0.66187
	0.70859	0.49653	0.70859	0.61142	0.70859	0.67511
	0.7202	0.50747	0.7202	0.62393	0.7202	0.68893
	0.73182	0.51909	0.73182	0.63705	0.73182	0.70341
	0.74343	0.53151	0.74343	0.65088	0.74343	0.71868
	0.75505	0.54483	0.75505	0.66551	0.75505	0.73483
	0.76667	0.55918	0.76667	0.68105	0.76667	0.75199
	0.77828	0.57465	0.77828	0.69759	0.77828	0.77026
	0.7899	0.59137	0.7899	0.71523	0.7899	0.78974
	0.80152	0.60941	0.80152	0.73406	0.80152	0.81052
	0.81313	0.62885	0.81313	0.75413	0.81313	0.83269
	0.82475	0.64975	0.82475	0.7755	0.82475	0.85628
	0.83636	0.67213	0.83636	0.79818	0.83636	0.88132
	0.84798	0.696	0.84798	0.82218	0.84798	0.90782
	0.8596	0.7213	0.8596	0.84746	0.8596	0.93574
	0.87121	0.74798	0.87121	0.87396	0.87121	0.965
	0.88283	0.77593	0.88283	0.90159	0.88283	0.99551
	0.89444	0.805	0.89444	0.93023	0.89444	1.02712
	0.90606	0.83504	0.90606	0.95971	0.90606	1.05968
	0.91768	0.86584	0.91768	0.98988	0.91768	1.09299
	0.92929	0.8972	0.92929	1.02054	0.92929	1.12685
	0.94091	0.92889	0.94091	1.05149	0.94091	1.16102
	0.95253	0.96067	0.95253	1.08253	0.95253	1.1953
	0.96414	0.99232	0.96414	1.11345	0.96414	1.22944
	0.97576	1.02362	0.97576	1.14406	0.97576	1.26324
	0.98737	1.05437	0.98737	1.17418	0.98737	1.2965
	0.99899	1.08439	0.99899	1.20366	0.99899	1.32904
	1.01061	1.11352	1.01061	1.23234	1.01061	1.36071
	1.02222	1.14166	1.02222	1.26014	1.02222	1.3914
	1.03384	1.1687	1.03384	1.28697	1.03384	1.42103
	1.04545	1.1946	1.04545	1.31278	1.04545	1.44953
	1.05707	1.21933	1.05707	1.33755	1.05707	1.47688
	1.06869	1.2429	1.06869	1.36128	1.06869	1.50308
	1.0803	1.26532	1.0803	1.38401	1.0803	1.52817
	1.09192	1.28667	1.09192	1.40577	1.09192	1.5522
	1.10354	1.307	1.10354	1.42662	1.10354	1.57523
	1.11515	1.32639	1.11515	1.44665	1.11515	1.59734
	1.12677	1.34493	1.12677	1.46592	1.12677	1.61862
	1.13838	1.36272	1.13838	1.48452	1.13838	1.63916
	1.15	1.37984	1.15	1.50253	1.15	1.65904

## Sheet: Appendix 1-fig. 3D
	Theoretical results						Experimental data
	Genes in the TCA cycle
	gltA		sucB		sucD		gltA		sucB		sucD
	Obtained from Eq. S118						Reference: Molecular Systems Biology 11, 784 (2015)
	Growth rate (1/h)	Relative protein expression	Growth rate (1/h)	Relative protein expression	Growth rate (1/h)	Relative protein expression	Growth rate (1/h)	Relative protein expression	Growth rate (1/h)	Relative protein expression	Growth rate (1/h)	Relative protein expression
	0	0	0	0	0	0	0.57762	1.6901	0.57762	1.1429	0.57762	1.638
	0.01162	0.03316	0.01162	0.02316	0.01162	0.03088	0.67079	1.8305	0.67079	1.2204	0.67079	1.7445
	0.02323	0.06631	0.02323	0.04632	0.02323	0.06176	0.86643	1.4941	0.86643	1.2003	0.86643	1.4083
	0.03485	0.09947	0.03485	0.06948	0.03485	0.09264	1.0397	0.80238	1.0397	0.91988	1.0397	0.83666
	0.04646	0.13263	0.04646	0.09264	0.04646	0.12352
	0.05808	0.16578	0.05808	0.1158	0.05808	0.15441
	0.0697	0.19894	0.0697	0.13897	0.0697	0.18529
	0.08131	0.2321	0.08131	0.16213	0.08131	0.21617
	0.09293	0.26526	0.09293	0.18529	0.09293	0.24705
	0.10455	0.29841	0.10455	0.20845	0.10455	0.27793
	0.11616	0.33157	0.11616	0.23161	0.11616	0.30881
	0.12778	0.36473	0.12778	0.25477	0.12778	0.33969
	0.13939	0.39788	0.13939	0.27793	0.13939	0.37057
	0.15101	0.43104	0.15101	0.30109	0.15101	0.40145
	0.16263	0.4642	0.16263	0.32425	0.16263	0.43234
	0.17424	0.49735	0.17424	0.34741	0.17424	0.46322
	0.18586	0.53051	0.18586	0.37057	0.18586	0.4941
	0.19747	0.56367	0.19747	0.39373	0.19747	0.52498
	0.20909	0.59683	0.20909	0.4169	0.20909	0.55586
	0.22071	0.62998	0.22071	0.44006	0.22071	0.58674
	0.23232	0.66314	0.23232	0.46322	0.23232	0.61762
	0.24394	0.6963	0.24394	0.48638	0.24394	0.6485
	0.25556	0.72945	0.25556	0.50954	0.25556	0.67938
	0.26717	0.76261	0.26717	0.5327	0.26717	0.71027
	0.27879	0.79577	0.27879	0.55586	0.27879	0.74115
	0.2904	0.82892	0.2904	0.57902	0.2904	0.77203
	0.30202	0.86208	0.30202	0.60218	0.30202	0.80291
	0.31364	0.89524	0.31364	0.62534	0.31364	0.83379
	0.32525	0.9284	0.32525	0.6485	0.32525	0.86467
	0.33687	0.96155	0.33687	0.67166	0.33687	0.89555
	0.34848	0.99471	0.34848	0.69483	0.34848	0.92643
	0.3601	1.02787	0.3601	0.71799	0.3601	0.95731
	0.37172	1.06102	0.37172	0.74115	0.37172	0.9882
	0.38333	1.09418	0.38333	0.76431	0.38333	1.01908
	0.39495	1.12734	0.39495	0.78747	0.39495	1.04996
	0.40657	1.16049	0.40657	0.81063	0.40657	1.08084
	0.41818	1.19365	0.41818	0.83379	0.41818	1.11172
	0.4298	1.2268	0.4298	0.85695	0.4298	1.1426
	0.44141	1.25996	0.44141	0.88011	0.44141	1.17347
	0.45303	1.29311	0.45303	0.90326	0.45303	1.20435
	0.46465	1.32626	0.46465	0.92642	0.46465	1.23522
	0.47626	1.3594	0.47626	0.94957	0.47626	1.26609
	0.48788	1.39254	0.48788	0.97271	0.48788	1.29695
	0.49949	1.42566	0.49949	0.99585	0.49949	1.3278
	0.51111	1.45877	0.51111	1.01897	0.51111	1.35862
	0.52273	1.49185	0.52273	1.04207	0.52273	1.38943
	0.53434	1.52489	0.53434	1.06514	0.53434	1.42019
	0.54596	1.55788	0.54596	1.08818	0.54596	1.4509
	0.55758	1.5908	0.55758	1.11115	0.55758	1.48153
	0.56919	1.6236	0.56919	1.13404	0.56919	1.51205
	0.58081	1.65626	0.58081	1.15681	0.58081	1.54242
	0.59242	1.68871	0.59242	1.17943	0.59242	1.57257
	0.60404	1.72089	0.60404	1.20183	0.60404	1.60244
	0.61566	1.75269	0.61566	1.22394	0.61566	1.63192
	0.62727	1.78401	0.62727	1.24567	0.62727	1.6609
	0.63889	1.81468	0.63889	1.26691	0.63889	1.68922
	0.65051	1.84453	0.65051	1.28751	0.65051	1.71668
	0.66212	1.87332	0.66212	1.3073	0.66212	1.74306
	0.67374	1.9008	0.67374	1.32606	0.67374	1.76808
	0.68535	1.92665	0.68535	1.34357	0.68535	1.79142
	0.69697	1.9505	0.69697	1.35952	0.69697	1.81269
	0.70859	1.97194	0.70859	1.37361	0.70859	1.83148
	0.7202	1.99051	0.7202	1.38547	0.7202	1.8473
	0.73182	2.0057	0.73182	1.39473	0.73182	1.85964
	0.74343	2.01698	0.74343	1.40095	0.74343	1.86794
	0.75505	2.0238	0.75505	1.40373	0.75505	1.87163
	0.76667	2.0256	0.76667	1.40261	0.76667	1.87014
	0.77828	2.02182	0.77828	1.39717	0.77828	1.8629
	0.7899	2.01197	0.7899	1.38703	0.7899	1.84938
	0.80152	1.99557	0.80152	1.37183	0.80152	1.82911
	0.81313	1.97228	0.81313	1.35129	0.81313	1.80172
	0.82475	1.94182	0.82475	1.3252	0.82475	1.76693
	0.83636	1.90406	0.83636	1.29345	0.83636	1.72461
	0.84798	1.85902	0.84798	1.25608	0.84798	1.67477
	0.8596	1.80688	0.8596	1.2132	0.8596	1.6176
	0.87121	1.74798	0.87121	1.16509	0.87121	1.55346
	0.88283	1.68285	0.88283	1.11216	0.88283	1.48288
	0.89444	1.61216	0.89444	1.05492	0.89444	1.40657
	0.90606	1.53675	0.90606	0.99403	0.90606	1.32537
	0.91768	1.45756	0.91768	0.93021	0.91768	1.24028
	0.92929	1.37564	0.92929	0.86429	0.92929	1.15238
	0.94091	1.29211	0.94091	0.79711	0.94091	1.06281
	0.95253	1.20811	0.95253	0.72956	0.95253	0.97275
	0.96414	1.12475	0.96414	0.66252	0.96414	0.88336
	0.97576	1.04311	0.97576	0.59681	0.97576	0.79574
	0.98737	0.96419	0.98737	0.5332	0.98737	0.71093
	0.99899	0.88886	0.99899	0.47237	0.99899	0.62983
	1.01061	0.81787	1.01061	0.4149	1.01061	0.5532
	1.02222	0.75181	1.02222	0.36125	1.02222	0.48166
	1.03384	0.69111	1.03384	0.31175	1.03384	0.41566
	1.04545	0.63605	1.04545	0.26661	1.04545	0.35548
	1.05707	0.58675	1.05707	0.22593	1.05707	0.30124
	1.06869	0.54318	1.06869	0.18969	1.06869	0.25292
	1.0803	0.50519	1.0803	0.15777	1.0803	0.21036
	1.09192	0.47255	1.09192	0.12999	1.09192	0.17332
	1.10354	0.4449	1.10354	0.10608	1.10354	0.14144
	1.11515	0.42186	1.11515	0.08573	1.11515	0.11431
	1.12677	0.403	1.12677	0.06861	1.12677	0.09149
	1.13838	0.38785	1.13838	0.05438	1.13838	0.0725
	1.15	0.37597	1.15	0.04267	1.15	0.0569

## Sheet: Appendix 1-fig. 3E-H
	Source data for Appendix 1-figure 3E													Source data for Appendix 1-figure 3F
	Theoretical results		Experimental data											Theoretical results		Experimental data
			Genes in glycolysis (ϕ1)													Genes in glycolysis (ϕ2)
			eno		fbaA		pgk		tpiA							aceE		pykF
	Obtained from Eq. S120 (a line)		Reference: Molecular Systems Biology 11, 784 (2015)											Obtained from Eq. S120 (a line)		Reference: Molecular Systems Biology 11, 784 (2015)
	Growth rate (1/h)	Relative protein expression	Growth rate (1/h)	Relative protein expression	Growth rate (1/h)	Relative protein expression	Growth rate (1/h)	Relative protein expression	Growth rate (1/h)	Relative protein expression				Growth rate (1/h)	Relative protein expression	Growth rate (1/h)	Relative protein expression	Growth rate (1/h)	Relative protein expression
	0	0	0.43895	0.5605	0.44046	0.5437	0.44228	0.5887	0.4394	0.5361				0	0	0.43895	0.5605	0.44046	0.5437
	1	1.12	0.52861	0.6781	0.53118	0.6359	0.52831	0.7049	0.52791	0.7521				1	1.12	0.52861	0.6781	0.53118	0.6359
			0.71884	0.7578	0.72141	0.7327	0.72096	0.904	0.7188	0.811						0.71884	0.7578	0.72141	0.7327
			0.80995	0.8448	0.81155	0.8475	0.81176	0.9367	0.8088	1.0878						0.80995	0.8448	0.81155	0.8475
			0.89007	1.0015	0.89174	0.997	0.89118	0.9855	0.89204	0.9943						0.89007	1.0015	0.89174	0.997
	Source data for Appendix 1-figure 3H												Source data for Appendix 1-figure 3G
	Theoretical results		Experimental data										Theoretical results		Experimental data
			Genes in the TCA cycle (ϕ4)												Genes in the TCA cycle (ϕ3)
			fumA		mdh		sucB		sucD						acnB		gltA		icd
	Obtained from Eq. S120 (a line)		Reference: Molecular Systems Biology 11, 784 (2015)										Obtained from Eq. S120 (a line)		Reference: Molecular Systems Biology 11, 784 (2015)
	Growth rate (1/h)	Relative protein expression	Growth rate (1/h)	Relative protein expression	Growth rate (1/h)	Relative protein expression	Growth rate (1/h)	Relative protein expression	Growth rate (1/h)	Relative protein expression			Growth rate (1/h)	Relative protein expression	Growth rate (1/h)	Relative protein expression	Growth rate (1/h)	Relative protein expression	Growth rate (1/h)	Relative protein expression
	0	0	0.43906	0.6863	0.439	0.4921	0.43953	0.4756	0.44243	0.5459			0	0	0.44086	0.6605	0.44135	0.7	0.44074	0.5807
	1	1.12	0.52813	0.7249	0.52721	0.6654	0.5289	0.7041	0.53114	0.691			1	1.12	0.52837	0.7463	0.52756	0.8461	0.5287	0.7656
			0.72254	0.926	0.71933	0.8672	0.71974	0.7184	0.72139	0.839					0.71957	0.8836	0.72197	0.8647	0.72037	0.8925
			0.80872	1.0484	0.80932	0.8933	0.81022	0.7702	0.8101	0.8963					0.80857	0.8836	0.81328	0.874	0.80926	0.9163
			0.89037	1.0089	0.89193	0.9913	0.88865	1.0028	0.89181	0.996					0.89018	0.9961	0.89507	1.0068	0.89074	0.9834

## Sheet: Appendix 1-fig. 3I-J
	Source data for Appendix 1-figure 3I								Source data for Appendix 1-figure 3J
	Theoretical results		Experimental data						Theoretical results		Experimental data
			Genes in glycolysis (ϕ2)								Genes in the TCA cycle (ϕ3)
			aceE		pykF						acnB		gltA		icd
	Obtained from Eq. S121 (a line)		Reference: Molecular Systems Biology 11, 784 (2015)						Obtained from Eq. S121 (a line)		Reference: Molecular Systems Biology 11, 784 (2015)
	Growth rate (1/h)	Relative protein expression	Growth rate (1/h)	Relative protein expression	Growth rate (1/h)	Relative protein expression			Growth rate (1/h)	Relative protein expression	Growth rate (1/h)	Relative protein expression	Growth rate (1/h)	Relative protein expression	Growth rate (1/h)	Relative protein expression
	0	0.16849	0.43895	0.5605	0.44046	0.5437			0	0.15033	0.44086	0.6605	0.44135	0.7	0.44074	0.5807
	1	1.1	0.52861	0.6781	0.53118	0.6359			1	1.1	0.52837	0.7463	0.52756	0.8461	0.5287	0.7656
			0.71884	0.7578	0.72141	0.7327					0.71957	0.8836	0.72197	0.8647	0.72037	0.8925
			0.80995	0.8448	0.81155	0.8475					0.80857	0.8836	0.81328	0.874	0.80926	0.9163
			0.89007	1.0015	0.89174	0.997					0.89018	0.9961	0.89507	1.0068	0.89074	0.9834

[truncated: 3 more sheets: Appendix 1-fig. 3K-N, Appendix 1-fig. 4A, Appendix 1-fig. 4B]
